# Supplementary material for: Genetic loci determining potato starch yield and granule morphology revealed by genome-wide association study (GWAS)
Source: PeerJ. 2020 Nov 10;8:e10286. doi: 10.7717/peerj.10286 (PMC7664467; doi:10.7717/peerj.10286)
Supplement: Supplemental Information 1 [file peerj-08-10286-s001.xlsx]

## Sheet: Sheet1
	average
Potato Variety	Starch yield	Feret's diameter	Area	Circularity	Aspect_Ratio_(AR)	Minimal_Feret's_diameter	Roundness	Solidity
785/8-5	10.7175	30.4384	598.348	0.829492	1.36	22.08	0.76	0.96
Agata	7.43313	31.5045	642.349	0.801165	1.39	22.88	0.74	0.95
Alena	15.0603	39.5	1060.05	0.845448	1.3	30.03	0.78	0.97
Antonina	17.2456	34.6002	761.945	0.837115	1.35	25.25	0.76	0.97
Arlekin	13.4014	34.913	797.148	0.829545	1.35	25.69	0.76	0.96
Babushka	11.73	36.3278	960.608	0.814161	1.34	27.01	0.77	0.96
Bozhedar	10.9959	34.5635	772.695	0.825446	1.39	24.78	0.75	0.96
Bravo	12.5611	31.8268	656.134	0.817368	1.41	22.73	0.74	0.96
Vasilyok	13.2557	32.1934	675.43	0.808992	1.39	23.11	0.74	0.96
Velikan	10.9157	29.0272	578.116	0.82865	1.34	21.77	0.77	0.96
Virazh	14.011	32.365	685.174	0.853822	1.32	24.07	0.77	0.97
Vympel	13.4008	36.773	904.362	0.844782	1.32	27.59	0.77	0.97
G 06-08-2015	14.2615	30.6756	627.036	0.826999	1.39	22.46	0.76	0.96
G 25-861	7.92577	27.287	478.683	0.802116	1.39	19.59	0.74	0.95
G 3-43-6	13.8144	34.8407	841.623	0.868258	1.25	27.35	0.81	0.98
G 21-8516	13.4932	33.5841	788.416	0.842151	1.32	25.05	0.77	0.97
G 3-43-2	8.60923	28.0104	540.429	0.853096	1.27	21.94	0.81	0.97
Gala	10.525	31.7739	665.197	0.82663	1.34	23.17	0.77	0.96
Golubizna	17.273	44.4178	1212.14	0.831157	1.42	31.05	0.72	0.97
Gornyak	13.3167	40.4769	1099.97	0.845615	1.31	30.64	0.78	0.97
Granat	15.0389	34.2273	837.202	0.842671	1.27	26.99	0.81	0.97
Granola	10.2623	39.663	1035.72	0.818134	1.36	29	0.76	0.96
Gulliver	10.8244	35.0239	820.553	0.840368	1.33	26.38	0.77	0.97
Gusar	10.6943	36.8829	910.986	0.855247	1.29	27.94	0.79	0.97
Debryansky	12.6883	34.7647	826.463	0.826166	1.33	25.92	0.77	0.96
Diamant	15.4696	42.788	1306.59	0.832959	1.36	32.27	0.77	0.97
DiDzhon 12	8.36259	28.6229	542.584	0.843324	1.33	21.16	0.77	0.96
Zhavoronok	11.8257	26.3279	470.435	0.82781	1.32	19.83	0.78	0.96
Zhigulyovsky	11.7757	33.2125	747.324	0.79554	1.4	23.9	0.74	0.95
Zhukovsky Ranny	10.6344	32.438	694.961	0.837685	1.34	24.06	0.77	0.96
Zagadka	14.1187	29.6382	591.083	0.788789	1.4	21.62	0.75	0.94
Zekura	10.6214	36.7024	879.058	0.811178	1.37	26.96	0.76	0.96
Zizella	8.0837	24.478	388.04	0.803629	1.33	18.41	0.78	0.95
Zlatka	13.2101	36.0042	826.596	0.848496	1.33	26.67	0.77	0.97
Il’insky	11.3715	36.4613	830.26	0.834055	1.37	26.51	0.75	0.97
Impala	9.82583	31.8516	686.818	0.847754	1.31	24.11	0.78	0.97
Irbitsky	13.2465	36.4421	880.649	0.839309	1.34	27.03	0.76	0.97
Kemerovchanin	15.2582	38.2196	965.606	0.844575	1.36	27.83	0.76	0.97
Klada	9.5352	29.832	584.535	0.821442	1.39	22.09	0.76	0.96
Kolobok	11.618	32.5275	722.406	0.846401	1.32	24.35	0.78	0.97
Kortny	15.9561	36.6608	871.017	0.826947	1.39	26.33	0.74	0.97
Krepysh	10.6917	33.6675	777.312	0.846934	1.28	25.67	0.8	0.97
Kuznechanka	13.778	39.6722	1036.73	0.849313	1.31	29.65	0.78	0.97
Ladozhsky	10.8035	31.6629	668.168	0.785267	1.43	22.8	0.74	0.94
Lina	12.9371	32.2238	673.496	0.853563	1.32	24	0.77	0.97
Lomonosovsky	14.5779	31.8907	716.054	0.837547	1.31	24.12	0.79	0.96
Lyubava	12.768	36.7564	983.199	0.857016	1.27	28.76	0.81	0.97
Luks	12.8405	31.541	693.454	0.844559	1.29	24	0.79	0.97
Maret	15.4076	41.9544	1182.79	0.842252	1.31	31.56	0.78	0.97
Matushka	17.7798	36.8912	987.253	0.850504	1.27	28.67	0.8	0.97
Melavitsa	12.7058	31.2397	652.125	0.836072	1.36	22.86	0.75	0.96
Meteor	13.1039	35.4384	828.689	0.851793	1.34	25.99	0.76	0.97
Mona Liza	11.32	46.4503	1370.43	0.834909	1.38	33.57	0.74	0.97
Nacra	16.5784	29.7748	608.972	0.841076	1.29	23.02	0.8	0.96
Nayada	14.373	36.0114	866.454	0.786118	1.42	25.82	0.73	0.95
Nevsky	13.5537	33.8287	793.178	0.808608	1.41	24.75	0.75	0.95
Nikulinsky	12.1388	38.5196	1019.61	0.82555	1.34	28.79	0.77	0.96
Novosibirsky	11.5636	29.3638	593.116	0.840146	1.28	22.62	0.8	0.96
Pamyati Osipovoi	13.153	26.7789	480.565	0.826672	1.34	19.75	0.77	0.96
Pamyati Rogacheva	18.3796	35.5747	818.004	0.846665	1.32	26.46	0.77	0.97
Picasso	9.56346	30.8453	630.719	0.800958	1.4	22.32	0.74	0.95
Radonezhsky	12.3794	36.5283	898.08	0.857386	1.3	27.89	0.79	0.97
Reggae	13.1892	43.5344	1161.6	0.837559	1.41	30.94	0.73	0.97
Red Scarlett	10.5267	33.6118	727.164	0.84745	1.33	24.75	0.77	0.97
Red Star	7.79352	27.3411	495.282	0.828078	1.38	20.09	0.76	0.96
Ruslan	12.4788	27.5908	518.588	0.836008	1.33	20.71	0.78	0.96
Russky Suvenir	12.122	33.1241	741.859	0.822687	1.33	25.08	0.78	0.96
S-112-03	16.8969	34.0078	809.124	0.851677	1.29	26.14	0.8	0.97
Samba	16.581	43.2845	1151.37	0.829111	1.42	30.2	0.72	0.97
Sante	10.8554	31.7732	661.602	0.828757	1.35	23.62	0.76	0.96
Sarovsky	17.5836	37.2699	934.377	0.844378	1.29	28.6	0.79	0.97
Safo	12.0184	32.8561	716.388	0.854643	1.33	24.23	0.77	0.97
Svitanok Kievsky	15.4341	32.4199	708.822	0.82524	1.3	24.97	0.79	0.96
Selma	10.8493	26.7148	467.068	0.830709	1.33	20.17	0.78	0.96
Skala	8.78297	28.3781	549.021	0.832363	1.31	21.66	0.79	0.96
Solnechny	15.0678	40.7464	1008.34	0.841259	1.4	28.97	0.73	0.97
Start	12.1563	36.5937	870.699	0.819457	1.38	26.19	0.75	0.96
Stigniya	15.6275	36.4335	919.156	0.8185	1.38	26.33	0.75	0.96
Sudarynya	12.1422	31.4092	621.333	0.844947	1.32	23.39	0.77	0.97
Tanay	11.2444	33.1808	728.017	0.852726	1.3	24.92	0.78	0.97
Tango	18.8005	39.2783	1069.94	0.86087	1.3	29.65	0.79	0.98
Tuleevsky	11.4868	35.6217	813.154	0.846461	1.36	25.76	0.76	0.97
Udacha	14.8305	42.1443	1187.61	0.835126	1.32	31.98	0.78	0.97
Favorit	8.38318	28.6967	559.961	0.855619	1.26	22.37	0.81	0.97
Fioletovy	13.3339	27.3048	497.215	0.863408	1.3	20.49	0.79	0.97
Fritella	13.836	35.5896	805.759	0.843273	1.36	25.68	0.75	0.97
Khozyayushka	14.7796	31.2935	651.212	0.855467	1.31	23.61	0.79	0.97
Charoit	14.0181	29.1642	586.916	0.856425	1.29	22.16	0.79	0.97
Yugana	13.9441	30.6633	632.131	0.841983	1.31	23.1	0.78	0.97
Yuna	12.6488	37.1839	932.216	0.856631	1.3	28.23	0.78	0.97
