# Supplementary material for: Genetic loci determining potato starch yield and granule morphology revealed by genome-wide association study (GWAS)
Source: PeerJ. 2020 Nov 10;8:e10286. doi: 10.7717/peerj.10286 (PMC7664467; doi:10.7717/peerj.10286)
Supplement: Supplemental Information 11 [file peerj-08-10286-s011.xlsx]

## Sheet: genotyping data
marker	allele A	allele B	Zhigulyovsky	Klada	Zhukovsky ranny	Antonina	Arlekin	Babushka	Sarovsky	Reggae	Red Scarlett	Picasso	Gulliver	Pamyati Rogacheva	Sudarynya	Di John 12	G 06-08-2015	Tanay	Golubizna	Fritella	Selma	Alena	Zizella	Khozyayushka	Sante	G 3-43-2	Maret	Diamant	Udacha	Yuna	Vasilyok	G.21. 8516	Gornyak	Kemerovchanin	Lina	Russian souvenir	Nacra	Safo	Tango	Stigniya	G. 25/861	785/8-5	Ruslan	Zagadka	Start	Melavitsa	Nayada	Bravo	Gala
CTRL-1	A	C	----	----	----	----	----	----	----	----	----	----	----	----	----	----	----	----	----	----	----	----	----	----	----	----	----	----	----	----	----	----	----	----	----	----	----	----	----	----	----	----	----	----	----	----	----	----	----
CTRL-10	A	C	----	----	----	----	----	----	----	----	----	----	----	----	----	----	----	----	----	----	----	----	----	----	----	----	----	----	----	----	----	----	----	----	----	----	----	----	----	----	----	----	----	----	----	----	----	----	----
CTRL-100	A	G	----	----	----	----	----	----	----	----	----	----	----	----	----	----	----	----	----	----	----	----	----	----	----	----	----	----	----	----	----	----	----	----	----	----	----	----	----	----	----	----	----	----	----	----	----	----	----
CTRL-101	A	G	----	----	----	----	----	----	----	----	----	----	----	----	----	----	----	----	----	----	----	----	----	----	----	----	----	----	----	----	----	----	----	----	----	----	----	----	----	----	----	----	----	----	----	----	----	----	----
CTRL-103	A	G	----	----	----	----	----	----	----	----	----	----	----	----	----	----	----	----	----	----	----	----	----	----	----	----	----	----	----	----	----	----	----	----	----	----	----	----	----	----	----	----	----	----	----	----	----	----	----
CTRL-104	A	G	----	----	----	----	----	----	----	----	----	----	----	----	----	----	----	----	----	----	----	----	----	----	----	----	----	----	----	----	----	----	----	----	----	----	----	----	----	----	----	----	----	----	----	----	----	----	----
CTRL-105	A	G	----	----	----	----	----	----	----	----	----	----	----	----	----	----	----	----	----	----	----	----	----	----	----	----	----	----	----	----	----	----	----	----	----	----	----	----	----	----	----	----	----	----	----	----	----	----	----
CTRL-106	A	G	----	----	----	----	----	----	----	----	----	----	----	----	----	----	----	----	----	----	----	----	----	----	----	----	----	----	----	----	----	----	----	----	----	----	----	----	----	----	----	----	----	----	----	----	----	----	----
CTRL-107	A	G	----	----	----	----	----	----	----	----	----	----	----	----	----	----	----	----	----	----	----	----	----	----	----	----	----	----	----	----	----	----	----	----	----	----	----	----	----	----	----	----	----	----	----	----	----	----	----
CTRL-11	A	C	----	----	----	----	----	----	----	----	----	----	----	----	----	----	----	----	----	----	----	----	----	----	----	----	----	----	----	----	----	----	----	----	----	----	----	----	----	----	----	----	----	----	----	----	----	----	----
CTRL-110	A	G	----	----	----	----	----	----	----	----	----	----	----	----	----	----	----	----	----	----	----	----	----	----	----	----	----	----	----	----	----	----	----	----	----	----	----	----	----	----	----	----	----	----	----	----	----	----	----
CTRL-12	A	C	----	----	----	----	----	----	----	----	----	----	----	----	----	----	----	----	----	----	----	----	----	----	----	----	----	----	----	----	----	----	----	----	----	----	----	----	----	----	----	----	----	----	----	----	----	----	----
CTRL-13	A	C	----	----	----	----	----	----	----	----	----	----	----	----	----	----	----	----	----	----	----	----	----	----	----	----	----	----	----	----	----	----	----	----	----	----	----	----	----	----	----	----	----	----	----	----	----	----	----
CTRL-14	A	C	----	----	----	----	----	----	----	----	----	----	----	----	----	----	----	----	----	----	----	----	----	----	----	----	----	----	----	----	----	----	----	----	----	----	----	----	----	----	----	----	----	----	----	----	----	----	----
CTRL-15	A	C	----	----	----	----	----	----	----	----	----	----	----	----	----	----	----	----	----	----	----	----	----	----	----	----	----	----	----	----	----	----	----	----	----	----	----	----	----	----	----	----	----	----	----	----	----	----	----
CTRL-16	A	C	----	----	----	----	----	----	----	----	----	----	----	----	----	----	----	----	----	----	----	----	----	----	----	----	----	----	----	----	----	----	----	----	----	----	----	----	----	----	----	----	----	----	----	----	----	----	----
CTRL-17	A	C	----	----	----	----	----	----	----	----	----	----	----	----	----	----	----	----	----	----	----	----	----	----	----	----	----	----	----	----	----	----	----	----	----	----	----	----	----	----	----	----	----	----	----	----	----	----	----
CTRL-18	A	C	----	----	----	----	----	----	----	----	----	----	----	----	----	----	----	----	----	----	----	----	----	----	----	----	----	----	----	----	----	----	----	----	----	----	----	----	----	----	----	----	----	----	----	----	----	----	----
CTRL-19	A	C	----	----	----	----	----	----	----	----	----	----	----	----	----	----	----	----	----	----	----	----	----	----	----	----	----	----	----	----	----	----	----	----	----	----	----	----	----	----	----	----	----	----	----	----	----	----	----
CTRL-2	A	C	----	----	----	----	----	----	----	----	----	----	----	----	----	----	----	----	----	----	----	----	----	----	----	----	----	----	----	----	----	----	----	----	----	----	----	----	----	----	----	----	----	----	----	----	----	----	----
CTRL-21	A	C	----	----	----	----	----	----	----	----	----	----	----	----	----	----	----	----	----	----	----	----	----	----	----	----	----	----	----	----	----	----	----	----	----	----	----	----	----	----	----	----	----	----	----	----	----	----	----
CTRL-22	A	C	----	----	----	----	----	----	----	----	----	----	----	----	----	----	----	----	----	----	----	----	----	----	----	----	----	----	----	----	----	----	----	----	----	----	----	----	----	----	----	----	----	----	----	----	----	----	----
CTRL-23	A	C	----	----	----	----	----	----	----	----	----	----	----	----	----	----	----	----	----	----	----	----	----	----	----	----	----	----	----	----	----	----	----	----	----	----	----	----	----	----	----	----	----	----	----	----	----	----	----
CTRL-24	A	C	----	----	----	----	----	----	----	----	----	----	----	----	----	----	----	----	----	----	----	----	----	----	----	----	----	----	----	----	----	----	----	----	----	----	----	----	----	----	----	----	----	----	----	----	----	----	----
CTRL-25	A	C	----	----	----	----	----	----	----	----	----	----	----	----	----	----	----	----	----	----	----	----	----	----	----	----	----	----	----	----	----	----	----	----	----	----	----	----	----	----	----	----	----	----	----	----	----	----	----
CTRL-26	A	C	----	----	----	----	----	----	----	----	----	----	----	----	----	----	----	----	----	----	----	----	----	----	----	----	----	----	----	----	----	----	----	----	----	----	----	----	----	----	----	----	----	----	----	----	----	----	----
CTRL-28	A	C	----	----	----	----	----	----	----	----	----	----	----	----	----	----	----	----	----	----	----	----	----	----	----	----	----	----	----	----	----	----	----	----	----	----	----	----	----	----	----	----	----	----	----	----	----	----	----
CTRL-3	A	C	----	----	----	----	----	----	----	----	----	----	----	----	----	----	----	----	----	----	----	----	----	----	----	----	----	----	----	----	----	----	----	----	----	----	----	----	----	----	----	----	----	----	----	----	----	----	----
CTRL-30	A	C	----	----	----	----	----	----	----	----	----	----	----	----	----	----	----	----	----	----	----	----	----	----	----	----	----	----	----	----	----	----	----	----	----	----	----	----	----	----	----	----	----	----	----	----	----	----	----
CTRL-31	A	C	----	----	----	----	----	----	----	----	----	----	----	----	----	----	----	----	----	----	----	----	----	----	----	----	----	----	----	----	----	----	----	----	----	----	----	----	----	----	----	----	----	----	----	----	----	----	----
CTRL-32	A	C	----	----	----	----	----	----	----	----	----	----	----	----	----	----	----	----	----	----	----	----	----	----	----	----	----	----	----	----	----	----	----	----	----	----	----	----	----	----	----	----	----	----	----	----	----	----	----
CTRL-33	A	C	----	----	----	----	----	----	----	----	----	----	----	----	----	----	----	----	----	----	----	----	----	----	----	----	----	----	----	----	----	----	----	----	----	----	----	----	----	----	----	----	----	----	----	----	----	----	----
CTRL-34	A	C	----	----	----	----	----	----	----	----	----	----	----	----	----	----	----	----	----	----	----	----	----	----	----	----	----	----	----	----	----	----	----	----	----	----	----	----	----	----	----	----	----	----	----	----	----	----	----
CTRL-35	A	C	----	----	----	----	----	----	----	----	----	----	----	----	----	----	----	----	----	----	----	----	----	----	----	----	----	----	----	----	----	----	----	----	----	----	----	----	----	----	----	----	----	----	----	----	----	----	----
CTRL-36	A	C	----	----	----	----	----	----	----	----	----	----	----	----	----	----	----	----	----	----	----	----	----	----	----	----	----	----	----	----	----	----	----	----	----	----	----	----	----	----	----	----	----	----	----	----	----	----	----
CTRL-37	A	C	----	----	----	----	----	----	----	----	----	----	----	----	----	----	----	----	----	----	----	----	----	----	----	----	----	----	----	----	----	----	----	----	----	----	----	----	----	----	----	----	----	----	----	----	----	----	----
CTRL-38	A	C	----	----	----	----	----	----	----	----	----	----	----	----	----	----	----	----	----	----	----	----	----	----	----	----	----	----	----	----	----	----	----	----	----	----	----	----	----	----	----	----	----	----	----	----	----	----	----
CTRL-39	A	C	----	----	----	----	----	----	----	----	----	----	----	----	----	----	----	----	----	----	----	----	----	----	----	----	----	----	----	----	----	----	----	----	----	----	----	----	----	----	----	----	----	----	----	----	----	----	----
CTRL-4	A	C	----	----	----	----	----	----	----	----	----	----	----	----	----	----	----	----	----	----	----	----	----	----	----	----	----	----	----	----	----	----	----	----	----	----	----	----	----	----	----	----	----	----	----	----	----	----	----
CTRL-40	A	C	----	----	----	----	----	----	----	----	----	----	----	----	----	----	----	----	----	----	----	----	----	----	----	----	----	----	----	----	----	----	----	----	----	----	----	----	----	----	----	----	----	----	----	----	----	----	----
CTRL-41	A	C	----	----	----	----	----	----	----	----	----	----	----	----	----	----	----	----	----	----	----	----	----	----	----	----	----	----	----	----	----	----	----	----	----	----	----	----	----	----	----	----	----	----	----	----	----	----	----
CTRL-42	A	C	----	----	----	----	----	----	----	----	----	----	----	----	----	----	----	----	----	----	----	----	----	----	----	----	----	----	----	----	----	----	----	----	----	----	----	----	----	----	----	----	----	----	----	----	----	----	----
CTRL-43	A	C	----	----	----	----	----	----	----	----	----	----	----	----	----	----	----	----	----	----	----	----	----	----	----	----	----	----	----	----	----	----	----	----	----	----	----	----	----	----	----	----	----	----	----	----	----	----	----
CTRL-44	A	C	----	----	----	----	----	----	----	----	----	----	----	----	----	----	----	----	----	----	----	----	----	----	----	----	----	----	----	----	----	----	----	----	----	----	----	----	----	----	----	----	----	----	----	----	----	----	----
CTRL-45	A	C	----	----	----	----	----	----	----	----	----	----	----	----	----	----	----	----	----	----	----	----	----	----	----	----	----	----	----	----	----	----	----	----	----	----	----	----	----	----	----	----	----	----	----	----	----	----	----
CTRL-47	A	C	----	----	----	----	----	----	----	----	----	----	----	----	----	----	----	----	----	----	----	----	----	----	----	----	----	----	----	----	----	----	----	----	----	----	----	----	----	----	----	----	----	----	----	----	----	----	----
CTRL-48	A	C	----	----	----	----	----	----	----	----	----	----	----	----	----	----	----	----	----	----	----	----	----	----	----	----	----	----	----	----	----	----	----	----	----	----	----	----	----	----	----	----	----	----	----	----	----	----	----
CTRL-49	A	C	----	----	----	----	----	----	----	----	----	----	----	----	----	----	----	----	----	----	----	----	----	----	----	----	----	----	----	----	----	----	----	----	----	----	----	----	----	----	----	----	----	----	----	----	----	----	----
CTRL-5	A	C	----	----	----	----	----	----	----	----	----	----	----	----	----	----	----	----	----	----	----	----	----	----	----	----	----	----	----	----	----	----	----	----	----	----	----	----	----	----	----	----	----	----	----	----	----	----	----
CTRL-50	A	C	----	----	----	----	----	----	----	----	----	----	----	----	----	----	----	----	----	----	----	----	----	----	----	----	----	----	----	----	----	----	----	----	----	----	----	----	----	----	----	----	----	----	----	----	----	----	----
CTRL-51	A	C	----	----	----	----	----	----	----	----	----	----	----	----	----	----	----	----	----	----	----	----	----	----	----	----	----	----	----	----	----	----	----	----	----	----	----	----	----	----	----	----	----	----	----	----	----	----	----
CTRL-52	A	C	----	----	----	----	----	----	----	----	----	----	----	----	----	----	----	----	----	----	----	----	----	----	----	----	----	----	----	----	----	----	----	----	----	----	----	----	----	----	----	----	----	----	----	----	----	----	----
CTRL-53	A	C	----	----	----	----	----	----	----	----	----	----	----	----	----	----	----	----	----	----	----	----	----	----	----	----	----	----	----	----	----	----	----	----	----	----	----	----	----	----	----	----	----	----	----	----	----	----	----
CTRL-54	A	C	----	----	----	----	----	----	----	----	----	----	----	----	----	----	----	----	----	----	----	----	----	----	----	----	----	----	----	----	----	----	----	----	----	----	----	----	----	----	----	----	----	----	----	----	----	----	----
CTRL-56	A	C	----	----	----	----	----	----	----	----	----	----	----	----	----	----	----	----	----	----	----	----	----	----	----	----	----	----	----	----	----	----	----	----	----	----	----	----	----	----	----	----	----	----	----	----	----	----	----
CTRL-57	A	C	----	----	----	----	----	----	----	----	----	----	----	----	----	----	----	----	----	----	----	----	----	----	----	----	----	----	----	----	----	----	----	----	----	----	----	----	----	----	----	----	----	----	----	----	----	----	----
CTRL-58	A	C	----	----	----	----	----	----	----	----	----	----	----	----	----	----	----	----	----	----	----	----	----	----	----	----	----	----	----	----	----	----	----	----	----	----	----	----	----	----	----	----	----	----	----	----	----	----	----
CTRL-59	A	C	----	----	----	----	----	----	----	----	----	----	----	----	----	----	----	----	----	----	----	----	----	----	----	----	----	----	----	----	----	----	----	----	----	----	----	----	----	----	----	----	----	----	----	----	----	----	----
CTRL-6	A	C	----	----	----	----	----	----	----	----	----	----	----	----	----	----	----	----	----	----	----	----	----	----	----	----	----	----	----	----	----	----	----	----	----	----	----	----	----	----	----	----	----	----	----	----	----	----	----
CTRL-60	A	C	----	----	----	----	----	----	----	----	----	----	----	----	----	----	----	----	----	----	----	----	----	----	----	----	----	----	----	----	----	----	----	----	----	----	----	----	----	----	----	----	----	----	----	----	----	----	----
CTRL-61	A	C	----	----	----	----	----	----	----	----	----	----	----	----	----	----	----	----	----	----	----	----	----	----	----	----	----	----	----	----	----	----	----	----	----	----	----	----	----	----	----	----	----	----	----	----	----	----	----
CTRL-62	A	C	----	----	----	----	----	----	----	----	----	----	----	----	----	----	----	----	----	----	----	----	----	----	----	----	----	----	----	----	----	----	----	----	----	----	----	----	----	----	----	----	----	----	----	----	----	----	----
CTRL-63	A	C	----	----	----	----	----	----	----	----	----	----	----	----	----	----	----	----	----	----	----	----	----	----	----	----	----	----	----	----	----	----	----	----	----	----	----	----	----	----	----	----	----	----	----	----	----	----	----
CTRL-64	A	C	----	----	----	----	----	----	----	----	----	----	----	----	----	----	----	----	----	----	----	----	----	----	----	----	----	----	----	----	----	----	----	----	----	----	----	----	----	----	----	----	----	----	----	----	----	----	----
CTRL-65	A	C	----	----	----	----	----	----	----	----	----	----	----	----	----	----	----	----	----	----	----	----	----	----	----	----	----	----	----	----	----	----	----	----	----	----	----	----	----	----	----	----	----	----	----	----	----	----	----
CTRL-66	A	C	----	----	----	----	----	----	----	----	----	----	----	----	----	----	----	----	----	----	----	----	----	----	----	----	----	----	----	----	----	----	----	----	----	----	----	----	----	----	----	----	----	----	----	----	----	----	----
CTRL-68	A	C	----	----	----	----	----	----	----	----	----	----	----	----	----	----	----	----	----	----	----	----	----	----	----	----	----	----	----	----	----	----	----	----	----	----	----	----	----	----	----	----	----	----	----	----	----	----	----
CTRL-69	A	C	----	----	----	----	----	----	----	----	----	----	----	----	----	----	----	----	----	----	----	----	----	----	----	----	----	----	----	----	----	----	----	----	----	----	----	----	----	----	----	----	----	----	----	----	----	----	----
CTRL-7	A	C	----	----	----	----	----	----	----	----	----	----	----	----	----	----	----	----	----	----	----	----	----	----	----	----	----	----	----	----	----	----	----	----	----	----	----	----	----	----	----	----	----	----	----	----	----	----	----
CTRL-70	A	C	----	----	----	----	----	----	----	----	----	----	----	----	----	----	----	----	----	----	----	----	----	----	----	----	----	----	----	----	----	----	----	----	----	----	----	----	----	----	----	----	----	----	----	----	----	----	----
CTRL-71	A	C	----	----	----	----	----	----	----	----	----	----	----	----	----	----	----	----	----	----	----	----	----	----	----	----	----	----	----	----	----	----	----	----	----	----	----	----	----	----	----	----	----	----	----	----	----	----	----
CTRL-73	A	C	----	----	----	----	----	----	----	----	----	----	----	----	----	----	----	----	----	----	----	----	----	----	----	----	----	----	----	----	----	----	----	----	----	----	----	----	----	----	----	----	----	----	----	----	----	----	----
CTRL-74	A	C	----	----	----	----	----	----	----	----	----	----	----	----	----	----	----	----	----	----	----	----	----	----	----	----	----	----	----	----	----	----	----	----	----	----	----	----	----	----	----	----	----	----	----	----	----	----	----
CTRL-75	A	C	----	----	----	----	----	----	----	----	----	----	----	----	----	----	----	----	----	----	----	----	----	----	----	----	----	----	----	----	----	----	----	----	----	----	----	----	----	----	----	----	----	----	----	----	----	----	----
CTRL-76	A	C	----	----	----	----	----	----	----	----	----	----	----	----	----	----	----	----	----	----	----	----	----	----	----	----	----	----	----	----	----	----	----	----	----	----	----	----	----	----	----	----	----	----	----	----	----	----	----
CTRL-77	A	C	----	----	----	----	----	----	----	----	----	----	----	----	----	----	----	----	----	----	----	----	----	----	----	----	----	----	----	----	----	----	----	----	----	----	----	----	----	----	----	----	----	----	----	----	----	----	----
CTRL-78	A	C	----	----	----	----	----	----	----	----	----	----	----	----	----	----	----	----	----	----	----	----	----	----	----	----	----	----	----	----	----	----	----	----	----	----	----	----	----	----	----	----	----	----	----	----	----	----	----
CTRL-79	A	C	----	----	----	----	----	----	----	----	----	----	----	----	----	----	----	----	----	----	----	----	----	----	----	----	----	----	----	----	----	----	----	----	----	----	----	----	----	----	----	----	----	----	----	----	----	----	----
CTRL-8	A	C	----	----	----	----	----	----	----	----	----	----	----	----	----	----	----	----	----	----	----	----	----	----	----	----	----	----	----	----	----	----	----	----	----	----	----	----	----	----	----	----	----	----	----	----	----	----	----
CTRL-80	A	C	----	----	----	----	----	----	----	----	----	----	----	----	----	----	----	----	----	----	----	----	----	----	----	----	----	----	----	----	----	----	----	----	----	----	----	----	----	----	----	----	----	----	----	----	----	----	----
CTRL-81	A	C	----	----	----	----	----	----	----	----	----	----	----	----	----	----	----	----	----	----	----	----	----	----	----	----	----	----	----	----	----	----	----	----	----	----	----	----	----	----	----	----	----	----	----	----	----	----	----
CTRL-82	A	C	----	----	----	----	----	----	----	----	----	----	----	----	----	----	----	----	----	----	----	----	----	----	----	----	----	----	----	----	----	----	----	----	----	----	----	----	----	----	----	----	----	----	----	----	----	----	----
CTRL-83	A	C	----	----	----	----	----	----	----	----	----	----	----	----	----	----	----	----	----	----	----	----	----	----	----	----	----	----	----	----	----	----	----	----	----	----	----	----	----	----	----	----	----	----	----	----	----	----	----
CTRL-84	A	C	----	----	----	----	----	----	----	----	----	----	----	----	----	----	----	----	----	----	----	----	----	----	----	----	----	----	----	----	----	----	----	----	----	----	----	----	----	----	----	----	----	----	----	----	----	----	----
CTRL-85	A	C	----	----	----	----	----	----	----	----	----	----	----	----	----	----	----	----	----	----	----	----	----	----	----	----	----	----	----	----	----	----	----	----	----	----	----	----	----	----	----	----	----	----	----	----	----	----	----
CTRL-86	A	C	----	----	----	----	----	----	----	----	----	----	----	----	----	----	----	----	----	----	----	----	----	----	----	----	----	----	----	----	----	----	----	----	----	----	----	----	----	----	----	----	----	----	----	----	----	----	----
CTRL-87	A	C	----	----	----	----	----	----	----	----	----	----	----	----	----	----	----	----	----	----	----	----	----	----	----	----	----	----	----	----	----	----	----	----	----	----	----	----	----	----	----	----	----	----	----	----	----	----	----
CTRL-88	A	G	----	----	----	----	----	----	----	----	----	----	----	----	----	----	----	----	----	----	----	----	----	----	----	----	----	----	----	----	----	----	----	----	----	----	----	----	----	----	----	----	----	----	----	----	----	----	----
CTRL-89	A	G	----	----	----	----	----	----	----	----	----	----	----	----	----	----	----	----	----	----	----	----	----	----	----	----	----	----	----	----	----	----	----	----	----	----	----	----	----	----	----	----	----	----	----	----	----	----	----
CTRL-9	A	C	----	----	----	----	----	----	----	----	----	----	----	----	----	----	----	----	----	----	----	----	----	----	----	----	----	----	----	----	----	----	----	----	----	----	----	----	----	----	----	----	----	----	----	----	----	----	----
CTRL-90	A	G	----	----	----	----	----	----	----	----	----	----	----	----	----	----	----	----	----	----	----	----	----	----	----	----	----	----	----	----	----	----	----	----	----	----	----	----	----	----	----	----	----	----	----	----	----	----	----
CTRL-91	A	G	----	----	----	----	----	----	----	----	----	----	----	----	----	----	----	----	----	----	----	----	----	----	----	----	----	----	----	----	----	----	----	----	----	----	----	----	----	----	----	----	----	----	----	----	----	----	----
CTRL-92	A	G	----	----	----	----	----	----	----	----	----	----	----	----	----	----	----	----	----	----	----	----	----	----	----	----	----	----	----	----	----	----	----	----	----	----	----	----	----	----	----	----	----	----	----	----	----	----	----
CTRL-93	A	G	----	----	----	----	----	----	----	----	----	----	----	----	----	----	----	----	----	----	----	----	----	----	----	----	----	----	----	----	----	----	----	----	----	----	----	----	----	----	----	----	----	----	----	----	----	----	----
CTRL-94	A	G	----	----	----	----	----	----	----	----	----	----	----	----	----	----	----	----	----	----	----	----	----	----	----	----	----	----	----	----	----	----	----	----	----	----	----	----	----	----	----	----	----	----	----	----	----	----	----
CTRL-95	A	G	----	----	----	----	----	----	----	----	----	----	----	----	----	----	----	----	----	----	----	----	----	----	----	----	----	----	----	----	----	----	----	----	----	----	----	----	----	----	----	----	----	----	----	----	----	----	----
CTRL-96	A	G	----	----	----	----	----	----	----	----	----	----	----	----	----	----	----	----	----	----	----	----	----	----	----	----	----	----	----	----	----	----	----	----	----	----	----	----	----	----	----	----	----	----	----	----	----	----	----
CTRL-97	A	G	----	----	----	----	----	----	----	----	----	----	----	----	----	----	----	----	----	----	----	----	----	----	----	----	----	----	----	----	----	----	----	----	----	----	----	----	----	----	----	----	----	----	----	----	----	----	----
CTRL-98	A	G	----	----	----	----	----	----	----	----	----	----	----	----	----	----	----	----	----	----	----	----	----	----	----	----	----	----	----	----	----	----	----	----	----	----	----	----	----	----	----	----	----	----	----	----	----	----	----
CTRL-99	A	G	----	----	----	----	----	----	----	----	----	----	----	----	----	----	----	----	----	----	----	----	----	----	----	----	----	----	----	----	----	----	----	----	----	----	----	----	----	----	----	----	----	----	----	----	----	----	----
CTRL2-1	A	C	----	----	----	----	----	----	----	----	----	----	----	----	----	----	----	----	----	----	----	----	----	----	----	----	----	----	----	----	----	----	----	----	----	----	----	----	----	----	----	----	----	----	----	----	----	----	----
CTRL2-10	A	C	----	----	----	----	----	----	----	----	----	----	----	----	----	----	----	----	----	----	----	----	----	----	----	----	----	----	----	----	----	----	----	----	----	----	----	----	----	----	----	----	----	----	----	----	----	----	----
CTRL2-100	A	G	----	----	----	----	----	----	----	----	----	----	----	----	----	----	----	----	----	----	----	----	----	----	----	----	----	----	----	----	----	----	----	----	----	----	----	----	----	----	----	----	----	----	----	----	----	----	----
CTRL2-101	A	G	----	----	----	----	----	----	----	----	----	----	----	----	----	----	----	----	----	----	----	----	----	----	----	----	----	----	----	----	----	----	----	----	----	----	----	----	----	----	----	----	----	----	----	----	----	----	----
CTRL2-103	A	G	----	----	----	----	----	----	----	----	----	----	----	----	----	----	----	----	----	----	----	----	----	----	----	----	----	----	----	----	----	----	----	----	----	----	----	----	----	----	----	----	----	----	----	----	----	----	----
CTRL2-104	A	G	----	----	----	----	----	----	----	----	----	----	----	----	----	----	----	----	----	----	----	----	----	----	----	----	----	----	----	----	----	----	----	----	----	----	----	----	----	----	----	----	----	----	----	----	----	----	----
CTRL2-105	A	G	----	----	----	----	----	----	----	----	----	----	----	----	----	----	----	----	----	----	----	----	----	----	----	----	----	----	----	----	----	----	----	----	----	----	----	----	----	----	----	----	----	----	----	----	----	----	----
CTRL2-106	A	G	----	----	----	----	----	----	----	----	----	----	----	----	----	----	----	----	----	----	----	----	----	----	----	----	----	----	----	----	----	----	----	----	----	----	----	----	----	----	----	----	----	----	----	----	----	----	----
CTRL2-107	A	G	----	----	----	----	----	----	----	----	----	----	----	----	----	----	----	----	----	----	----	----	----	----	----	----	----	----	----	----	----	----	----	----	----	----	----	----	----	----	----	----	----	----	----	----	----	----	----
CTRL2-11	A	C	----	----	----	----	----	----	----	----	----	----	----	----	----	----	----	----	----	----	----	----	----	----	----	----	----	----	----	----	----	----	----	----	----	----	----	----	----	----	----	----	----	----	----	----	----	----	----
CTRL2-110	A	G	----	----	----	----	----	----	----	----	----	----	----	----	----	----	----	----	----	----	----	----	----	----	----	----	----	----	----	----	----	----	----	----	----	----	----	----	----	----	----	----	----	----	----	----	----	----	----
CTRL2-12	A	C	----	----	----	----	----	----	----	----	----	----	----	----	----	----	----	----	----	----	----	----	----	----	----	----	----	----	----	----	----	----	----	----	----	----	----	----	----	----	----	----	----	----	----	----	----	----	----
CTRL2-13	A	C	----	----	----	----	----	----	----	----	----	----	----	----	----	----	----	----	----	----	----	----	----	----	----	----	----	----	----	----	----	----	----	----	----	----	----	----	----	----	----	----	----	----	----	----	----	----	----
CTRL2-14	A	C	----	----	----	----	----	----	----	----	----	----	----	----	----	----	----	----	----	----	----	----	----	----	----	----	----	----	----	----	----	----	----	----	----	----	----	----	----	----	----	----	----	----	----	----	----	----	----
CTRL2-15	A	C	----	----	----	----	----	----	----	----	----	----	----	----	----	----	----	----	----	----	----	----	----	----	----	----	----	----	----	----	----	----	----	----	----	----	----	----	----	----	----	----	----	----	----	----	----	----	----
CTRL2-16	A	C	----	----	----	----	----	----	----	----	----	----	----	----	----	----	----	----	----	----	----	----	----	----	----	----	----	----	----	----	----	----	----	----	----	----	----	----	----	----	----	----	----	----	----	----	----	----	----
CTRL2-17	A	C	----	----	----	----	----	----	----	----	----	----	----	----	----	----	----	----	----	----	----	----	----	----	----	----	----	----	----	----	----	----	----	----	----	----	----	----	----	----	----	----	----	----	----	----	----	----	----
CTRL2-18	A	C	----	----	----	----	----	----	----	----	----	----	----	----	----	----	----	----	----	----	----	----	----	----	----	----	----	----	----	----	----	----	----	----	----	----	----	----	----	----	----	----	----	----	----	----	----	----	----
CTRL2-19	A	C	----	----	----	----	----	----	----	----	----	----	----	----	----	----	----	----	----	----	----	----	----	----	----	----	----	----	----	----	----	----	----	----	----	----	----	----	----	----	----	----	----	----	----	----	----	----	----
CTRL2-2	A	C	----	----	----	----	----	----	----	----	----	----	----	----	----	----	----	----	----	----	----	----	----	----	----	----	----	----	----	----	----	----	----	----	----	----	----	----	----	----	----	----	----	----	----	----	----	----	----
CTRL2-21	A	C	----	----	----	----	----	----	----	----	----	----	----	----	----	----	----	----	----	----	----	----	----	----	----	----	----	----	----	----	----	----	----	----	----	----	----	----	----	----	----	----	----	----	----	----	----	----	----
CTRL2-22	A	C	----	----	----	----	----	----	----	----	----	----	----	----	----	----	----	----	----	----	----	----	----	----	----	----	----	----	----	----	----	----	----	----	----	----	----	----	----	----	----	----	----	----	----	----	----	----	----
CTRL2-23	A	C	----	----	----	----	----	----	----	----	----	----	----	----	----	----	----	----	----	----	----	----	----	----	----	----	----	----	----	----	----	----	----	----	----	----	----	----	----	----	----	----	----	----	----	----	----	----	----
CTRL2-24	A	C	----	----	----	----	----	----	----	----	----	----	----	----	----	----	----	----	----	----	----	----	----	----	----	----	----	----	----	----	----	----	----	----	----	----	----	----	----	----	----	----	----	----	----	----	----	----	----
CTRL2-25	A	C	----	----	----	----	----	----	----	----	----	----	----	----	----	----	----	----	----	----	----	----	----	----	----	----	----	----	----	----	----	----	----	----	----	----	----	----	----	----	----	----	----	----	----	----	----	----	----
CTRL2-26	A	C	----	----	----	----	----	----	----	----	----	----	----	----	----	----	----	----	----	----	----	----	----	----	----	----	----	----	----	----	----	----	----	----	----	----	----	----	----	----	----	----	----	----	----	----	----	----	----
CTRL2-3	A	C	----	----	----	----	----	----	----	----	----	----	----	----	----	----	----	----	----	----	----	----	----	----	----	----	----	----	----	----	----	----	----	----	----	----	----	----	----	----	----	----	----	----	----	----	----	----	----
CTRL2-30	A	C	----	----	----	----	----	----	----	----	----	----	----	----	----	----	----	----	----	----	----	----	----	----	----	----	----	----	----	----	----	----	----	----	----	----	----	----	----	----	----	----	----	----	----	----	----	----	----
CTRL2-31	A	C	----	----	----	----	----	----	----	----	----	----	----	----	----	----	----	----	----	----	----	----	----	----	----	----	----	----	----	----	----	----	----	----	----	----	----	----	----	----	----	----	----	----	----	----	----	----	----
CTRL2-32	A	C	----	----	----	----	----	----	----	----	----	----	----	----	----	----	----	----	----	----	----	----	----	----	----	----	----	----	----	----	----	----	----	----	----	----	----	----	----	----	----	----	----	----	----	----	----	----	----
CTRL2-33	A	C	----	----	----	----	----	----	----	----	----	----	----	----	----	----	----	----	----	----	----	----	----	----	----	----	----	----	----	----	----	----	----	----	----	----	----	----	----	----	----	----	----	----	----	----	----	----	----
CTRL2-34	A	C	----	----	----	----	----	----	----	----	----	----	----	----	----	----	----	----	----	----	----	----	----	----	----	----	----	----	----	----	----	----	----	----	----	----	----	----	----	----	----	----	----	----	----	----	----	----	----
CTRL2-35	A	C	----	----	----	----	----	----	----	----	----	----	----	----	----	----	----	----	----	----	----	----	----	----	----	----	----	----	----	----	----	----	----	----	----	----	----	----	----	----	----	----	----	----	----	----	----	----	----
CTRL2-36	A	C	----	----	----	----	----	----	----	----	----	----	----	----	----	----	----	----	----	----	----	----	----	----	----	----	----	----	----	----	----	----	----	----	----	----	----	----	----	----	----	----	----	----	----	----	----	----	----
CTRL2-37	A	C	----	----	----	----	----	----	----	----	----	----	----	----	----	----	----	----	----	----	----	----	----	----	----	----	----	----	----	----	----	----	----	----	----	----	----	----	----	----	----	----	----	----	----	----	----	----	----
CTRL2-38	A	C	----	----	----	----	----	----	----	----	----	----	----	----	----	----	----	----	----	----	----	----	----	----	----	----	----	----	----	----	----	----	----	----	----	----	----	----	----	----	----	----	----	----	----	----	----	----	----
CTRL2-39	A	C	----	----	----	----	----	----	----	----	----	----	----	----	----	----	----	----	----	----	----	----	----	----	----	----	----	----	----	----	----	----	----	----	----	----	----	----	----	----	----	----	----	----	----	----	----	----	----
CTRL2-4	A	C	----	----	----	----	----	----	----	----	----	----	----	----	----	----	----	----	----	----	----	----	----	----	----	----	----	----	----	----	----	----	----	----	----	----	----	----	----	----	----	----	----	----	----	----	----	----	----
CTRL2-40	A	C	----	----	----	----	----	----	----	----	----	----	----	----	----	----	----	----	----	----	----	----	----	----	----	----	----	----	----	----	----	----	----	----	----	----	----	----	----	----	----	----	----	----	----	----	----	----	----
CTRL2-41	A	C	----	----	----	----	----	----	----	----	----	----	----	----	----	----	----	----	----	----	----	----	----	----	----	----	----	----	----	----	----	----	----	----	----	----	----	----	----	----	----	----	----	----	----	----	----	----	----
CTRL2-42	A	C	----	----	----	----	----	----	----	----	----	----	----	----	----	----	----	----	----	----	----	----	----	----	----	----	----	----	----	----	----	----	----	----	----	----	----	----	----	----	----	----	----	----	----	----	----	----	----
CTRL2-43	A	C	----	----	----	----	----	----	----	----	----	----	----	----	----	----	----	----	----	----	----	----	----	----	----	----	----	----	----	----	----	----	----	----	----	----	----	----	----	----	----	----	----	----	----	----	----	----	----
CTRL2-44	A	C	----	----	----	----	----	----	----	----	----	----	----	----	----	----	----	----	----	----	----	----	----	----	----	----	----	----	----	----	----	----	----	----	----	----	----	----	----	----	----	----	----	----	----	----	----	----	----
CTRL2-45	A	C	----	----	----	----	----	----	----	----	----	----	----	----	----	----	----	----	----	----	----	----	----	----	----	----	----	----	----	----	----	----	----	----	----	----	----	----	----	----	----	----	----	----	----	----	----	----	----
CTRL2-47	A	C	----	----	----	----	----	----	----	----	----	----	----	----	----	----	----	----	----	----	----	----	----	----	----	----	----	----	----	----	----	----	----	----	----	----	----	----	----	----	----	----	----	----	----	----	----	----	----
CTRL2-48	A	C	----	----	----	----	----	----	----	----	----	----	----	----	----	----	----	----	----	----	----	----	----	----	----	----	----	----	----	----	----	----	----	----	----	----	----	----	----	----	----	----	----	----	----	----	----	----	----
CTRL2-49	A	C	----	----	----	----	----	----	----	----	----	----	----	----	----	----	----	----	----	----	----	----	----	----	----	----	----	----	----	----	----	----	----	----	----	----	----	----	----	----	----	----	----	----	----	----	----	----	----
CTRL2-5	A	C	----	----	----	----	----	----	----	----	----	----	----	----	----	----	----	----	----	----	----	----	----	----	----	----	----	----	----	----	----	----	----	----	----	----	----	----	----	----	----	----	----	----	----	----	----	----	----
CTRL2-50	A	C	----	----	----	----	----	----	----	----	----	----	----	----	----	----	----	----	----	----	----	----	----	----	----	----	----	----	----	----	----	----	----	----	----	----	----	----	----	----	----	----	----	----	----	----	----	----	----
CTRL2-51	A	C	----	----	----	----	----	----	----	----	----	----	----	----	----	----	----	----	----	----	----	----	----	----	----	----	----	----	----	----	----	----	----	----	----	----	----	----	----	----	----	----	----	----	----	----	----	----	----
CTRL2-52	A	C	----	----	----	----	----	----	----	----	----	----	----	----	----	----	----	----	----	----	----	----	----	----	----	----	----	----	----	----	----	----	----	----	----	----	----	----	----	----	----	----	----	----	----	----	----	----	----
CTRL2-53	A	C	----	----	----	----	----	----	----	----	----	----	----	----	----	----	----	----	----	----	----	----	----	----	----	----	----	----	----	----	----	----	----	----	----	----	----	----	----	----	----	----	----	----	----	----	----	----	----
CTRL2-54	A	C	----	----	----	----	----	----	----	----	----	----	----	----	----	----	----	----	----	----	----	----	----	----	----	----	----	----	----	----	----	----	----	----	----	----	----	----	----	----	----	----	----	----	----	----	----	----	----
CTRL2-56	A	C	----	----	----	----	----	----	----	----	----	----	----	----	----	----	----	----	----	----	----	----	----	----	----	----	----	----	----	----	----	----	----	----	----	----	----	----	----	----	----	----	----	----	----	----	----	----	----
CTRL2-57	A	C	----	----	----	----	----	----	----	----	----	----	----	----	----	----	----	----	----	----	----	----	----	----	----	----	----	----	----	----	----	----	----	----	----	----	----	----	----	----	----	----	----	----	----	----	----	----	----
CTRL2-58	A	C	----	----	----	----	----	----	----	----	----	----	----	----	----	----	----	----	----	----	----	----	----	----	----	----	----	----	----	----	----	----	----	----	----	----	----	----	----	----	----	----	----	----	----	----	----	----	----
CTRL2-59	A	C	----	----	----	----	----	----	----	----	----	----	----	----	----	----	----	----	----	----	----	----	----	----	----	----	----	----	----	----	----	----	----	----	----	----	----	----	----	----	----	----	----	----	----	----	----	----	----
CTRL2-6	A	C	----	----	----	----	----	----	----	----	----	----	----	----	----	----	----	----	----	----	----	----	----	----	----	----	----	----	----	----	----	----	----	----	----	----	----	----	----	----	----	----	----	----	----	----	----	----	----
CTRL2-60	A	C	----	----	----	----	----	----	----	----	----	----	----	----	----	----	----	----	----	----	----	----	----	----	----	----	----	----	----	----	----	----	----	----	----	----	----	----	----	----	----	----	----	----	----	----	----	----	----
CTRL2-61	A	C	----	----	----	----	----	----	----	----	----	----	----	----	----	----	----	----	----	----	----	----	----	----	----	----	----	----	----	----	----	----	----	----	----	----	----	----	----	----	----	----	----	----	----	----	----	----	----
CTRL2-62	A	C	----	----	----	----	----	----	----	----	----	----	----	----	----	----	----	----	----	----	----	----	----	----	----	----	----	----	----	----	----	----	----	----	----	----	----	----	----	----	----	----	----	----	----	----	----	----	----
CTRL2-63	A	C	----	----	----	----	----	----	----	----	----	----	----	----	----	----	----	----	----	----	----	----	----	----	----	----	----	----	----	----	----	----	----	----	----	----	----	----	----	----	----	----	----	----	----	----	----	----	----
CTRL2-64	A	C	----	----	----	----	----	----	----	----	----	----	----	----	----	----	----	----	----	----	----	----	----	----	----	----	----	----	----	----	----	----	----	----	----	----	----	----	----	----	----	----	----	----	----	----	----	----	----
CTRL2-65	A	C	----	----	----	----	----	----	----	----	----	----	----	----	----	----	----	----	----	----	----	----	----	----	----	----	----	----	----	----	----	----	----	----	----	----	----	----	----	----	----	----	----	----	----	----	----	----	----
CTRL2-66	A	C	----	----	----	----	----	----	----	----	----	----	----	----	----	----	----	----	----	----	----	----	----	----	----	----	----	----	----	----	----	----	----	----	----	----	----	----	----	----	----	----	----	----	----	----	----	----	----
CTRL2-68	A	C	----	----	----	----	----	----	----	----	----	----	----	----	----	----	----	----	----	----	----	----	----	----	----	----	----	----	----	----	----	----	----	----	----	----	----	----	----	----	----	----	----	----	----	----	----	----	----
CTRL2-69	A	C	----	----	----	----	----	----	----	----	----	----	----	----	----	----	----	----	----	----	----	----	----	----	----	----	----	----	----	----	----	----	----	----	----	----	----	----	----	----	----	----	----	----	----	----	----	----	----
CTRL2-7	A	C	----	----	----	----	----	----	----	----	----	----	----	----	----	----	----	----	----	----	----	----	----	----	----	----	----	----	----	----	----	----	----	----	----	----	----	----	----	----	----	----	----	----	----	----	----	----	----
CTRL2-70	A	C	----	----	----	----	----	----	----	----	----	----	----	----	----	----	----	----	----	----	----	----	----	----	----	----	----	----	----	----	----	----	----	----	----	----	----	----	----	----	----	----	----	----	----	----	----	----	----
CTRL2-71	A	C	----	----	----	----	----	----	----	----	----	----	----	----	----	----	----	----	----	----	----	----	----	----	----	----	----	----	----	----	----	----	----	----	----	----	----	----	----	----	----	----	----	----	----	----	----	----	----
CTRL2-73	A	C	----	----	----	----	----	----	----	----	----	----	----	----	----	----	----	----	----	----	----	----	----	----	----	----	----	----	----	----	----	----	----	----	----	----	----	----	----	----	----	----	----	----	----	----	----	----	----
CTRL2-74	A	C	----	----	----	----	----	----	----	----	----	----	----	----	----	----	----	----	----	----	----	----	----	----	----	----	----	----	----	----	----	----	----	----	----	----	----	----	----	----	----	----	----	----	----	----	----	----	----
CTRL2-75	A	C	----	----	----	----	----	----	----	----	----	----	----	----	----	----	----	----	----	----	----	----	----	----	----	----	----	----	----	----	----	----	----	----	----	----	----	----	----	----	----	----	----	----	----	----	----	----	----
CTRL2-76	A	C	----	----	----	----	----	----	----	----	----	----	----	----	----	----	----	----	----	----	----	----	----	----	----	----	----	----	----	----	----	----	----	----	----	----	----	----	----	----	----	----	----	----	----	----	----	----	----
CTRL2-77	A	C	----	----	----	----	----	----	----	----	----	----	----	----	----	----	----	----	----	----	----	----	----	----	----	----	----	----	----	----	----	----	----	----	----	----	----	----	----	----	----	----	----	----	----	----	----	----	----
CTRL2-78	A	C	----	----	----	----	----	----	----	----	----	----	----	----	----	----	----	----	----	----	----	----	----	----	----	----	----	----	----	----	----	----	----	----	----	----	----	----	----	----	----	----	----	----	----	----	----	----	----
CTRL2-79	A	C	----	----	----	----	----	----	----	----	----	----	----	----	----	----	----	----	----	----	----	----	----	----	----	----	----	----	----	----	----	----	----	----	----	----	----	----	----	----	----	----	----	----	----	----	----	----	----
CTRL2-8	A	C	----	----	----	----	----	----	----	----	----	----	----	----	----	----	----	----	----	----	----	----	----	----	----	----	----	----	----	----	----	----	----	----	----	----	----	----	----	----	----	----	----	----	----	----	----	----	----
CTRL2-80	A	C	----	----	----	----	----	----	----	----	----	----	----	----	----	----	----	----	----	----	----	----	----	----	----	----	----	----	----	----	----	----	----	----	----	----	----	----	----	----	----	----	----	----	----	----	----	----	----
CTRL2-81	A	C	----	----	----	----	----	----	----	----	----	----	----	----	----	----	----	----	----	----	----	----	----	----	----	----	----	----	----	----	----	----	----	----	----	----	----	----	----	----	----	----	----	----	----	----	----	----	----
CTRL2-82	A	C	----	----	----	----	----	----	----	----	----	----	----	----	----	----	----	----	----	----	----	----	----	----	----	----	----	----	----	----	----	----	----	----	----	----	----	----	----	----	----	----	----	----	----	----	----	----	----
CTRL2-83	A	C	----	----	----	----	----	----	----	----	----	----	----	----	----	----	----	----	----	----	----	----	----	----	----	----	----	----	----	----	----	----	----	----	----	----	----	----	----	----	----	----	----	----	----	----	----	----	----
CTRL2-84	A	C	----	----	----	----	----	----	----	----	----	----	----	----	----	----	----	----	----	----	----	----	----	----	----	----	----	----	----	----	----	----	----	----	----	----	----	----	----	----	----	----	----	----	----	----	----	----	----
CTRL2-85	A	C	----	----	----	----	----	----	----	----	----	----	----	----	----	----	----	----	----	----	----	----	----	----	----	----	----	----	----	----	----	----	----	----	----	----	----	----	----	----	----	----	----	----	----	----	----	----	----
CTRL2-86	A	C	----	----	----	----	----	----	----	----	----	----	----	----	----	----	----	----	----	----	----	----	----	----	----	----	----	----	----	----	----	----	----	----	----	----	----	----	----	----	----	----	----	----	----	----	----	----	----
CTRL2-87	A	C	----	----	----	----	----	----	----	----	----	----	----	----	----	----	----	----	----	----	----	----	----	----	----	----	----	----	----	----	----	----	----	----	----	----	----	----	----	----	----	----	----	----	----	----	----	----	----
CTRL2-88	A	G	----	----	----	----	----	----	----	----	----	----	----	----	----	----	----	----	----	----	----	----	----	----	----	----	----	----	----	----	----	----	----	----	----	----	----	----	----	----	----	----	----	----	----	----	----	----	----
CTRL2-89	A	G	----	----	----	----	----	----	----	----	----	----	----	----	----	----	----	----	----	----	----	----	----	----	----	----	----	----	----	----	----	----	----	----	----	----	----	----	----	----	----	----	----	----	----	----	----	----	----
CTRL2-9	A	C	----	----	----	----	----	----	----	----	----	----	----	----	----	----	----	----	----	----	----	----	----	----	----	----	----	----	----	----	----	----	----	----	----	----	----	----	----	----	----	----	----	----	----	----	----	----	----
CTRL2-90	A	G	----	----	----	----	----	----	----	----	----	----	----	----	----	----	----	----	----	----	----	----	----	----	----	----	----	----	----	----	----	----	----	----	----	----	----	----	----	----	----	----	----	----	----	----	----	----	----
CTRL2-91	A	G	----	----	----	----	----	----	----	----	----	----	----	----	----	----	----	----	----	----	----	----	----	----	----	----	----	----	----	----	----	----	----	----	----	----	----	----	----	----	----	----	----	----	----	----	----	----	----
CTRL2-92	A	G	----	----	----	----	----	----	----	----	----	----	----	----	----	----	----	----	----	----	----	----	----	----	----	----	----	----	----	----	----	----	----	----	----	----	----	----	----	----	----	----	----	----	----	----	----	----	----
CTRL2-93	A	G	----	----	----	----	----	----	----	----	----	----	----	----	----	----	----	----	----	----	----	----	----	----	----	----	----	----	----	----	----	----	----	----	----	----	----	----	----	----	----	----	----	----	----	----	----	----	----
CTRL2-94	A	G	----	----	----	----	----	----	----	----	----	----	----	----	----	----	----	----	----	----	----	----	----	----	----	----	----	----	----	----	----	----	----	----	----	----	----	----	----	----	----	----	----	----	----	----	----	----	----
CTRL2-95	A	G	----	----	----	----	----	----	----	----	----	----	----	----	----	----	----	----	----	----	----	----	----	----	----	----	----	----	----	----	----	----	----	----	----	----	----	----	----	----	----	----	----	----	----	----	----	----	----
CTRL2-96	A	G	----	----	----	----	----	----	----	----	----	----	----	----	----	----	----	----	----	----	----	----	----	----	----	----	----	----	----	----	----	----	----	----	----	----	----	----	----	----	----	----	----	----	----	----	----	----	----
CTRL2-97	A	G	----	----	----	----	----	----	----	----	----	----	----	----	----	----	----	----	----	----	----	----	----	----	----	----	----	----	----	----	----	----	----	----	----	----	----	----	----	----	----	----	----	----	----	----	----	----	----
CTRL2-98	A	G	----	----	----	----	----	----	----	----	----	----	----	----	----	----	----	----	----	----	----	----	----	----	----	----	----	----	----	----	----	----	----	----	----	----	----	----	----	----	----	----	----	----	----	----	----	----	----
CTRL2-99	A	G	----	----	----	----	----	----	----	----	----	----	----	----	----	----	----	----	----	----	----	----	----	----	----	----	----	----	----	----	----	----	----	----	----	----	----	----	----	----	----	----	----	----	----	----	----	----	----
D_locus_(DFR)_A_LG02	T	C	TTCC	TTTT	TTTC	TTTC	TTTT	TTCC	TTTC	TTTC	TTTC	TTCC	TTCC	TTTC	TTTT	TTTC	TTTT	TTTC	TTTT	TTCC	TTTC	TTCC	TTTT	TTTC	TTTC	TTTC	TTTT	TTTT	TTTC	TTTT	TTTC	TTTT	TTCC	TTCC	TTTC	TTTT	TCCC	TTTT	TTCC	TTTT	TTCC	TTTC	TTTT	TTTT	TTCC	TTTC	TTCC	TTTC	TTCC
D_locus_(DFR)_C_LG02	A	G	AAGG	AAAA	AAAG	AAAG	AAAA	AAGG	AAAG	AAAG	AAAG	AAGG	AAGG	AAAG	AAAA	AAAG	AAAA	AAAG	AAAA	AAGG	AAAG	AGGG	AAAA	AAAG	AAAG	AAAG	AAAA	AAAA	AAAG	AAAA	AAAG	AAAA	AGGG	AAGG	AAAG	AAAA	AGGG	AAAA	AAGG	AAAA	AAGG	AAAG	AAAA	AAAA	AAGG	AAAG	AAGG	AAAG	AAGG
D_locus_(DFR)_D_LG02	A	G	AAGG	AAAA	AAAG	AAAG	AAAA	AAGG	AAAG	AAAG	AAAG	AAGG	AAGG	AAAG	AAAA	AAAG	AAAA	AAAG	AAAA	AAGG	AAAG	AGGG	AAAA	AAAG	AAAG	AAAG	AAAA	AAAA	AAAG	AAAA	AAAG	AAAA	AGGG	AAGG	AAAG	AAAA	AGGG	AAAA	AAGG	AAAA	AAGG	AAAG	AAAA	AAAA	AAGG	AAAG	AAGG	AAAG	AAGG
D_locus_(DFR)_G_LG02	T	A	TTAA	AAAA	TAAA	TAAA	AAAA	TTAA	TAAA	TAAA	TAAA	TTAA	TTAA	TAAA	AAAA	TAAA	AAAA	TAAA	AAAA	TTAA	TAAA	TTTA	AAAA	TAAA	TAAA	TAAA	AAAA	AAAA	TAAA	AAAA	TAAA	AAAA	TTTA	TTAA	TAAA	AAAA	TTTA	AAAA	TTAA	AAAA	TTAA	TAAA	AAAA	AAAA	TTAA	TAAA	----	TAAA	TTAA
D_locus_(DFR)_H_LG02	T	C	TTCC	CCCC	TCCC	TCCC	CCCC	TTCC	TCCC	TCCC	TCCC	TTCC	TTCC	TCCC	CCCC	TCCC	CCCC	TCCC	CCCC	TTCC	TCCC	TTTC	CCCC	TCCC	TCCC	TCCC	CCCC	CCCC	TCCC	CCCC	TCCC	CCCC	TTTC	TTCC	TCCC	CCCC	----	CCCC	TTCC	CCCC	TTCC	TCCC	CCCC	CCCC	TTCC	TCCC	TTCC	TCCC	TTCC
D_locus_(DFR)_I_LG02	A	C	AACC	CCCC	ACCC	ACCC	CCCC	AACC	ACCC	ACCC	ACCC	AACC	AACC	ACCC	CCCC	ACCC	CCCC	ACCC	CCCC	AACC	ACCC	AAAC	CCCC	ACCC	ACCC	ACCC	CCCC	CCCC	ACCC	CCCC	ACCC	CCCC	AAAC	AACC	ACCC	CCCC	AAAC	CCCC	AACC	CCCC	AACC	ACCC	CCCC	CCCC	AACC	ACCC	AACC	ACCC	AACC
Gpa_2_G_LG12	A	G	----	----	----	----	----	----	----	----	----	----	----	----	----	----	----	----	----	----	----	----	----	----	----	----	----	----	----	----	----	----	----	----	----	----	----	----	----	----	----	----	----	----	----	----	----	----	----
Gro14_a_Paal_LG07	T	A	----	----	----	----	----	----	----	----	----	----	----	----	----	----	----	----	----	----	----	----	----	----	----	----	----	----	----	----	----	----	----	----	----	----	----	----	----	----	----	----	----	----	----	----	----	----	----
Gro14_b_Paal_LG07	T	A	----	----	----	----	----	----	----	----	----	----	----	----	----	----	----	----	----	----	----	----	----	----	----	----	----	----	----	----	----	----	----	----	----	----	----	----	----	----	----	----	----	----	----	----	----	----	----
Gro14_c_Paal_LG07	T	C	----	----	----	----	----	----	----	----	----	----	----	----	----	----	----	----	----	----	----	----	----	----	----	----	----	----	----	----	----	----	----	----	----	----	----	----	----	----	----	----	----	----	----	----	----	----	----
Gro14_d_Paal_LG07	T	C	----	----	----	----	----	----	----	----	----	----	----	----	----	----	----	----	----	----	----	----	----	----	----	----	----	----	----	----	----	----	----	----	----	----	----	----	----	----	----	----	----	----	----	----	----	----	----
Gro14_f_Paal_LG07	A	G	----	----	----	----	----	----	----	----	----	----	----	----	----	----	----	----	----	----	----	----	----	----	----	----	----	----	----	----	----	----	----	----	----	----	----	----	----	----	----	----	----	----	----	----	----	----	----
I_locus_(Stan2)_bb_LG10	T	C	CCCC	CCCC	CCCC	CCCC	TCCC	CCCC	TCCC	CCCC	CCCC	CCCC	CCCC	CCCC	CCCC	CCCC	CCCC	CCCC	CCCC	CCCC	CCCC	CCCC	CCCC	CCCC	CCCC	TCCC	CCCC	CCCC	CCCC	CCCC	CCCC	CCCC	CCCC	CCCC	CCCC	CCCC	CCCC	CCCC	CCCC	CCCC	TCCC	CCCC	CCCC	CCCC	TCCC	CCCC	CCCC	CCCC	CCCC
I_locus_(Stan2)_e_LG10	T	C	----	----	----	----	----	----	----	----	----	----	----	----	----	----	----	----	----	----	----	----	----	----	----	----	----	----	----	----	----	----	----	----	----	----	----	----	----	----	----	----	----	----	----	----	----	----	----
Plocus_F35H_a1_LG11	A	G	AGGG	AGGG	AAGG	AGGG	GGGG	AGGG	GGGG	GGGG	GGGG	AAGG	GGGG	AGGG	GGGG	AGGG	GGGG	GGGG	GGGG	GGGG	GGGG	GGGG	GGGG	AGGG	GGGG	GGGG	GGGG	GGGG	AGGG	GGGG	GGGG	GGGG	AAGG	GGGG	GGGG	GGGG	GGGG	GGGG	AGGG	AGGG	GGGG	GGGG	AGGG	AGGG	GGGG	AGGG	AGGG	AAGG	GGGG
Plocus_F35H_a2_LG11	A	G	AGGG	AGGG	AAGG	AGGG	GGGG	AGGG	GGGG	GGGG	GGGG	AAGG	GGGG	AGGG	GGGG	AGGG	GGGG	GGGG	GGGG	GGGG	GGGG	GGGG	GGGG	AGGG	GGGG	GGGG	GGGG	GGGG	AGGG	GGGG	GGGG	GGGG	AAGG	GGGG	GGGG	GGGG	GGGG	GGGG	AGGG	AGGG	GGGG	GGGG	AGGG	AGGG	GGGG	AGGG	AGGG	AAGG	GGGG
Plocus_F35H_b1_LG11	A	G	AGGG	AGGG	GGGG	GGGG	GGGG	GGGG	GGGG	GGGG	GGGG	GGGG	GGGG	GGGG	GGGG	GGGG	GGGG	GGGG	GGGG	GGGG	GGGG	GGGG	GGGG	GGGG	GGGG	GGGG	GGGG	GGGG	AGGG	GGGG	GGGG	GGGG	AGGG	GGGG	GGGG	GGGG	GGGG	GGGG	GGGG	AGGG	GGGG	GGGG	GGGG	AGGG	GGGG	GGGG	AGGG	AGGG	GGGG
Plocus_F35H_b2_LG11	A	G	AGGG	AGGG	GGGG	GGGG	GGGG	GGGG	GGGG	GGGG	GGGG	GGGG	GGGG	GGGG	GGGG	GGGG	GGGG	GGGG	GGGG	GGGG	GGGG	GGGG	GGGG	GGGG	GGGG	GGGG	GGGG	GGGG	AGGG	GGGG	GGGG	GGGG	AGGG	GGGG	GGGG	GGGG	GGGG	GGGG	GGGG	AGGG	GGGG	GGGG	GGGG	AGGG	GGGG	GGGG	AGGG	AGGG	GGGG
PotVar0000007	A	G	GGGG	GGGG	GGGG	GGGG	GGGG	GGGG	GGGG	GGGG	GGGG	GGGG	AGGG	GGGG	----	GGGG	GGGG	GGGG	AGGG	GGGG	GGGG	GGGG	GGGG	GGGG	GGGG	GGGG	----	AGGG	GGGG	GGGG	AGGG	GGGG	GGGG	GGGG	GGGG	GGGG	GGGG	GGGG	GGGG	AGGG	GGGG	GGGG	GGGG	GGGG	GGGG	GGGG	GGGG	GGGG	GGGG
PotVar0000025	A	G	AAAA	AGGG	AAAG	AAAG	AAGG	AAGG	AAGG	AAAG	AGGG	AAGG	AAAG	AAAG	AAGG	AAGG	AAAG	AAAA	AAGG	AAAG	----	AAGG	AAGG	AAAG	AAAA	AAGG	AAGG	AAGG	AAGG	AAAG	AAGG	AAAG	AAGG	AAAG	AAAA	AAAA	AAAA	AAAG	AGGG	AAAG	AAAG	AAGG	AAAG	AAGG	AAGG	AAAG	AAGG	AAAG	AAGG
PotVar0000040	T	C	TCCC	CCCC	CCCC	TTCC	TCCC	CCCC	CCCC	CCCC	CCCC	CCCC	CCCC	TCCC	TCCC	CCCC	TTCC	TCCC	CCCC	TCCC	TTCC	TCCC	TCCC	TCCC	TTCC	TCCC	TCCC	TCCC	TCCC	TCCC	TCCC	CCCC	TCCC	TCCC	TTCC	TCCC	TTTC	CCCC	TCCC	CCCC	CCCC	CCCC	CCCC	TCCC	TCCC	CCCC	CCCC	TTCC	CCCC
PotVar0000042	A	G	AGGG	AAAG	AGGG	AAAG	AAAG	AAAG	AAGG	AGGG	AAAG	AAGG	AGGG	AAGG	AAAG	AAGG	AAAG	AGGG	AAGG	AAGG	AAAA	AAAG	AAAG	AAGG	AAGG	AAAG	AAAG	AAAG	AAAG	AAGG	AAAG	AGGG	AAAG	AAGG	AAGG	AAGG	AAAG	AGGG	AAAA	AAGG	AGGG	AAGG	AGGG	AAAG	AAAG	AGGG	AAAG	AAAG	AAGG
PotVar0000060	T	C	TTCC	CCCC	CCCC	TTCC	TCCC	CCCC	CCCC	CCCC	CCCC	TCCC	CCCC	TCCC	TCCC	CCCC	TTCC	TTCC	CCCC	TCCC	TTCC	TCCC	TCCC	TCCC	TTCC	TCCC	TCCC	TCCC	----	TCCC	TCCC	CCCC	TCCC	TTCC	TTCC	TCCC	TTTC	TCCC	TCCC	CCCC	CCCC	TCCC	CCCC	TCCC	TCCC	CCCC	CCCC	TTCC	CCCC
PotVar0000061	A	G	AAAG	AAAA	AAAA	AAAA	AAAA	AAAA	AAAA	AAAA	AAAA	AAAG	AAAA	AAAA	AAAA	AAAA	AAAA	AAAG	AAAA	AAAA	AAAA	AAAA	AAAA	AAAA	AAAA	AAAA	AAAA	AAAA	AAAG	AAAA	AAAA	AAAA	AAAA	AAAG	AAAA	AAAA	AAAA	AAAG	AAAA	AAAA	AAAA	AAAG	AAAA	AAAA	AAAA	AAAA	AAAA	AAAA	AAAA
PotVar0000062	A	G	AGGG	GGGG	GGGG	GGGG	AGGG	GGGG	GGGG	GGGG	GGGG	GGGG	GGGG	GGGG	GGGG	GGGG	AGGG	AGGG	GGGG	AGGG	GGGG	GGGG	AGGG	AGGG	AGGG	AGGG	AGGG	AGGG	AGGG	AGGG	GGGG	GGGG	AGGG	AGGG	AGGG	GGGG	AGGG	GGGG	GGGG	GGGG	GGGG	GGGG	GGGG	AGGG	GGGG	GGGG	GGGG	AGGG	GGGG
PotVar0000066	T	C	CCCC	TTTC	TCCC	TCCC	TTCC	TTCC	TTCC	TCCC	TTTC	TTCC	CCCC	TCCC	TCCC	TTCC	TCCC	CCCC	TCCC	TCCC	TTCC	TTCC	TCCC	TCCC	CCCC	TTCC	TCCC	TCCC	TTCC	TCCC	TCCC	TCCC	TTCC	TCCC	CCCC	CCCC	CCCC	TCCC	TTTC	CCCC	TCCC	TTCC	TCCC	TTCC	TTCC	TCCC	TTCC	TCCC	TTCC
PotVar0000078	A	G	----	----	----	----	----	----	----	----	----	----	----	----	----	----	----	----	----	----	----	----	----	----	----	----	----	----	----	----	----	----	----	----	----	----	----	----	----	----	----	----	----	----	----	----	----	----	----
PotVar0000195	A	C	----	----	----	----	----	----	----	----	----	----	----	----	----	----	----	----	----	----	----	----	----	----	----	----	----	----	----	----	----	----	----	----	----	----	----	----	----	----	----	----	----	----	----	----	----	----	----
PotVar0000210	A	G	----	----	----	----	----	----	----	----	----	----	----	----	----	----	----	----	----	----	----	----	----	----	----	----	----	----	----	----	----	----	----	----	----	----	----	----	----	----	----	----	----	----	----	----	----	----	----
PotVar0000255	T	C	----	----	----	----	----	----	----	----	----	----	----	----	----	----	----	----	----	----	----	----	----	----	----	----	----	----	----	----	----	----	----	----	----	----	----	----	----	----	----	----	----	----	----	----	----	----	----
PotVar0000412	T	G	----	----	----	----	----	----	----	----	----	----	----	----	----	----	----	----	----	----	----	----	----	----	----	----	----	----	----	----	----	----	----	----	----	----	----	----	----	----	----	----	----	----	----	----	----	----	----
PotVar0000446	A	G	GGGG	GGGG	GGGG	GGGG	GGGG	GGGG	GGGG	GGGG	AGGG	GGGG	GGGG	GGGG	GGGG	AGGG	GGGG	GGGG	GGGG	GGGG	GGGG	GGGG	GGGG	GGGG	GGGG	GGGG	GGGG	GGGG	GGGG	AGGG	GGGG	GGGG	GGGG	GGGG	GGGG	GGGG	GGGG	GGGG	GGGG	GGGG	GGGG	AGGG	GGGG	GGGG	GGGG	GGGG	AGGG	GGGG	GGGG
PotVar0000457	T	C	CCCC	CCCC	CCCC	CCCC	CCCC	CCCC	TCCC	CCCC	CCCC	CCCC	CCCC	CCCC	CCCC	CCCC	CCCC	CCCC	CCCC	CCCC	CCCC	CCCC	CCCC	CCCC	CCCC	CCCC	CCCC	CCCC	CCCC	CCCC	CCCC	CCCC	CCCC	CCCC	CCCC	CCCC	CCCC	CCCC	CCCC	CCCC	CCCC	CCCC	CCCC	CCCC	CCCC	CCCC	CCCC	CCCC	CCCC
PotVar0000459	A	G	GGGG	GGGG	AGGG	AAGG	AGGG	AAGG	GGGG	AGGG	AGGG	AAGG	AGGG	GGGG	AGGG	AGGG	AAAG	AGGG	AGGG	AGGG	AAGG	GGGG	AAGG	GGGG	AGGG	AAGG	AAGG	AAGG	GGGG	GGGG	AAGG	GGGG	GGGG	AGGG	AGGG	AGGG	AGGG	AGGG	AGGG	GGGG	AGGG	AGGG	AGGG	AGGG	AAGG	AAGG	GGGG	AGGG	AAGG
PotVar0000460	T	C	TTCC	CCCC	TTCC	CCCC	CCCC	TCCC	TCCC	TCCC	CCCC	CCCC	TCCC	TCCC	TTCC	TCCC	CCCC	TTCC	TCCC	TTCC	TCCC	TCCC	TTCC	----	CCCC	TCCC	TCCC	TCCC	TTCC	TTCC	CCCC	TCCC	TCCC	TCCC	CCCC	TCCC	CCCC	TCCC	TCCC	TCCC	TCCC	CCCC	TTCC	TTCC	TTCC	CCCC	TTTC	TTCC	TCCC
PotVar0000462	A	G	----	----	----	----	----	----	----	----	----	----	----	----	----	----	----	----	----	----	----	----	----	----	----	----	----	----	----	----	----	----	----	----	----	----	----	----	----	----	----	----	----	----	----	----	----	----	----
PotVar0000472	A	G	GGGG	GGGG	GGGG	GGGG	GGGG	GGGG	GGGG	GGGG	GGGG	GGGG	GGGG	GGGG	GGGG	GGGG	GGGG	GGGG	GGGG	GGGG	GGGG	GGGG	GGGG	GGGG	GGGG	GGGG	GGGG	GGGG	GGGG	GGGG	GGGG	GGGG	GGGG	GGGG	GGGG	GGGG	GGGG	GGGG	GGGG	GGGG	GGGG	GGGG	GGGG	GGGG	GGGG	GGGG	GGGG	GGGG	GGGG
PotVar0000474	A	G	AAGG	AAGG	GGGG	GGGG	AGGG	AGGG	GGGG	AGGG	AGGG	AGGG	AGGG	AGGG	GGGG	AGGG	GGGG	GGGG	AGGG	AGGG	GGGG	AGGG	GGGG	AGGG	AGGG	GGGG	AGGG	AGGG	GGGG	AAGG	GGGG	AGGG	AAGG	GGGG	AGGG	AGGG	AGGG	AGGG	AGGG	GGGG	AGGG	AAGG	GGGG	GGGG	GGGG	AGGG	AGGG	GGGG	GGGG
PotVar0000481	A	G	AAAA	AAAA	AAAG	AAAG	AAAG	AAGG	AAAA	AAAG	AAAA	AAAG	AAAG	AAAA	AAAG	AAAA	AAGG	AAAG	AAAG	AAAG	AAAG	AAAA	AAAG	AAAA	AAAA	AAGG	AAAG	AAAG	AAAA	AAAA	AAAG	AAAA	AAAG	AAAA	AAAA	AAAA	AAAA	AAAG	AAAA	AAAA	AAAG	AAAA	AAAG	AAAG	AAAG	AAAG	AAAA	AAAA	AAGG
PotVar0000484	A	G	GGGG	AGGG	AGGG	GGGG	GGGG	GGGG	GGGG	AGGG	AGGG	GGGG	AGGG	GGGG	AGGG	GGGG	GGGG	GGGG	AGGG	GGGG	AGGG	GGGG	GGGG	----	AAGG	GGGG	GGGG	GGGG	GGGG	GGGG	AAGG	GGGG	GGGG	GGGG	AAGG	GGGG	GGGG	AGGG	GGGG	AGGG	AGGG	AGGG	GGGG	GGGG	GGGG	GGGG	GGGG	GGGG	GGGG
PotVar0000495	A	G	AAGG	GGGG	AAGG	AGGG	AGGG	AGGG	AGGG	AGGG	AGGG	GGGG	AGGG	AAGG	AGGG	AGGG	AGGG	AAAG	AGGG	AAGG	GGGG	AAGG	AAGG	AAGG	GGGG	AAGG	AAGG	AAGG	AAAA	AAGG	GGGG	AGGG	GGGG	AAAA	GGGG	AGGG	GGGG	AGGG	AAGG	AAGG	AGGG	GGGG	AAAG	AAGG	AAGG	GGGG	AAAG	AAGG	AAGG
PotVar0000512	T	C	CCCC	TCCC	CCCC	CCCC	CCCC	CCCC	CCCC	TCCC	TCCC	CCCC	TCCC	CCCC	TCCC	CCCC	CCCC	CCCC	CCCC	CCCC	CCCC	CCCC	CCCC	TCCC	TTCC	CCCC	CCCC	CCCC	CCCC	CCCC	CCCC	CCCC	CCCC	CCCC	TTCC	CCCC	CCCC	CCCC	CCCC	TCCC	TCCC	----	CCCC	CCCC	CCCC	CCCC	CCCC	CCCC	CCCC
PotVar0000514	A	C	AAAA	AAAC	AAAA	AAAC	AAAC	AAAC	AACC	AAAA	AACC	AACC	AAAA	AAAA	AAAC	AACC	AAAC	AAAA	AAAC	AAAC	AACC	AAAC	AAAC	AAAA	AACC	AAAA	AAAC	AAAC	AAAA	AAAC	AAAC	ACCC	AACC	AAAA	AACC	AAAC	AAAC	AAAA	AAAC	AAAC	AAAC	AACC	AAAA	AAAC	AAAC	AAAC	AAAC	AACC	AAAA
PotVar0000542	T	C	TTCC	TTCC	TTTC	CCCC	TCCC	TCCC	TTCC	TTCC	TCCC	CCCC	TTCC	TTCC	TTCC	TTCC	CCCC	TTCC	TCCC	TTCC	CCCC	TTCC	TTCC	TTCC	TTCC	TCCC	TTCC	TTCC	TTCC	----	CCCC	TCCC	CCCC	TTCC	TTCC	TTCC	TTCC	TCCC	CCCC	TTCC	TTCC	TCCC	TTCC	TTCC	TTCC	TCCC	TTTC	TTCC	TCCC
PotVar0000568	A	G	GGGG	AGGG	GGGG	GGGG	GGGG	GGGG	GGGG	GGGG	GGGG	GGGG	GGGG	GGGG	GGGG	AGGG	GGGG	GGGG	GGGG	GGGG	GGGG	GGGG	GGGG	GGGG	GGGG	GGGG	GGGG	GGGG	GGGG	GGGG	GGGG	GGGG	GGGG	GGGG	GGGG	GGGG	GGGG	GGGG	GGGG	GGGG	GGGG	GGGG	GGGG	GGGG	GGGG	GGGG	GGGG	GGGG	GGGG
PotVar0000579	A	G	GGGG	GGGG	AGGG	AGGG	AGGG	AAGG	GGGG	AGGG	GGGG	AGGG	AGGG	GGGG	AGGG	GGGG	AGGG	AGGG	AGGG	AGGG	AGGG	GGGG	AGGG	GGGG	GGGG	AAGG	AGGG	AGGG	GGGG	GGGG	AGGG	GGGG	AGGG	GGGG	GGGG	GGGG	GGGG	AGGG	GGGG	GGGG	AGGG	GGGG	AGGG	GGGG	AGGG	AGGG	GGGG	GGGG	AAGG
PotVar0000583	A	C	CCCC	CCCC	CCCC	ACCC	ACCC	CCCC	CCCC	CCCC	ACCC	CCCC	CCCC	ACCC	CCCC	CCCC	AACC	ACCC	ACCC	CCCC	ACCC	ACCC	CCCC	----	CCCC	ACCC	CCCC	CCCC	AACC	CCCC	AACC	CCCC	CCCC	AACC	CCCC	CCCC	CCCC	ACCC	AACC	ACCC	CCCC	ACCC	ACCC	ACCC	CCCC	CCCC	CCCC	CCCC	ACCC
PotVar0000586	A	C	AACC	AAAC	AAAA	AAAC	AAAA	AAAA	AAAA	AAAA	AAAA	AAAC	AAAC	AAAC	AAAA	AAAA	AAAA	AAAA	AAAA	AAAA	AAAA	AAAA	AAAA	AAAC	AAAA	AAAA	AAAA	AAAA	AAAA	AAAA	AAAA	AAAA	AAAC	AAAA	AAAA	AAAC	AAAC	AAAC	AAAC	AAAA	AAAA	AAAA	AAAA	AAAA	AAAA	AAAA	AAAA	AAAA	AAAA
PotVar0000614	T	C	CCCC	CCCC	CCCC	CCCC	CCCC	CCCC	CCCC	CCCC	CCCC	CCCC	CCCC	CCCC	CCCC	CCCC	CCCC	CCCC	CCCC	CCCC	CCCC	CCCC	CCCC	CCCC	CCCC	CCCC	CCCC	CCCC	CCCC	CCCC	CCCC	CCCC	CCCC	CCCC	CCCC	CCCC	CCCC	CCCC	CCCC	CCCC	CCCC	CCCC	CCCC	CCCC	CCCC	CCCC	CCCC	CCCC	CCCC
PotVar0000616	T	C	----	----	----	----	----	----	----	----	----	----	----	----	----	----	----	----	----	----	----	----	----	----	----	----	----	----	----	----	----	----	----	----	----	----	----	----	----	----	----	----	----	----	----	----	----	----	----
PotVar0000619	T	G	TTTT	TTTT	TTTT	TTTG	TTTG	TTTG	TTTT	TTTT	TTGG	TTTG	TTTT	TTTT	TTTG	TTTG	TTTG	TTTT	TTTG	TTTG	TTGG	TTTG	TTTG	TTTT	TTGG	TTTT	TTTG	TTTG	TTTT	TTTG	TTTG	TTTG	TTTG	TTTT	TTGG	TTTG	TTTG	TTTT	TTTG	TTTT	TTTG	TTGG	TTTT	TTTT	TTTG	TTTG	TTTG	TTTG	TTTT
PotVar0000651	A	G	----	----	----	----	----	----	----	----	----	----	----	----	----	----	----	----	----	----	----	----	----	----	----	----	----	----	----	----	----	----	----	----	----	----	----	----	----	----	----	----	----	----	----	----	----	----	----
PotVar0000716	T	G	----	----	----	----	----	----	----	----	----	----	----	----	----	----	----	----	----	----	----	----	----	----	----	----	----	----	----	----	----	----	----	----	----	----	----	----	----	----	----	----	----	----	----	----	----	----	----
PotVar0000717	A	G	AAAA	AAAA	AAAA	AAAA	AAAA	AAAA	AAAA	AAAA	AAAA	AAAA	AAAA	AAAA	AAAA	AAAA	AAAA	AAAA	AAAA	AAAA	AAAA	AAAA	AAAA	AAAA	AAAA	AAAA	AAAA	AAAA	AAAA	AAAA	AAAA	AAAA	AAAA	AAAA	AAAA	AAAA	AAAA	AAAA	AAAA	AAAA	AAAA	AAAA	AAAA	AAAA	AAAA	AAAA	AAAA	AAAA	AAAA
PotVar0000732	T	G	GGGG	TGGG	GGGG	TGGG	TGGG	TGGG	GGGG	TGGG	TTGG	TGGG	GGGG	GGGG	TGGG	TTGG	TGGG	GGGG	GGGG	GGGG	TTGG	TGGG	TGGG	TGGG	TTGG	GGGG	TGGG	TGGG	GGGG	TGGG	TGGG	TGGG	TGGG	GGGG	----	TGGG	TGGG	GGGG	TGGG	TGGG	TGGG	TTTG	GGGG	GGGG	TGGG	TTGG	TGGG	TGGG	GGGG
PotVar0000750	T	C	----	----	----	----	----	----	----	----	----	----	----	----	----	----	----	----	----	----	----	----	----	----	----	----	----	----	----	----	----	----	----	----	----	----	----	----	----	----	----	----	----	----	----	----	----	----	----
PotVar0000751	A	G	----	----	----	----	----	----	----	----	----	----	----	----	----	----	----	----	----	----	----	----	----	----	----	----	----	----	----	----	----	----	----	----	----	----	----	----	----	----	----	----	----	----	----	----	----	----	----
PotVar0000753	T	C	TTTT	TTTT	TTTT	TTTT	TTTT	TTTT	TTTT	TTTT	TTTT	TTTT	TTTT	TTTT	TTTT	TTTT	TTTT	TTTT	TTTT	TTTT	TTTT	TTTT	TTTT	TTTT	TTTC	TTTT	TTTT	TTTT	TTTT	TTTT	TTTT	TTTT	TTTT	TTTT	TTTC	TTTT	TTTT	TTTT	TTTT	TTTT	TTTT	TTTT	TTTT	TTTT	TTTT	TTTT	TTTT	TTTT	TTTT
PotVar0000758	A	G	----	----	----	----	----	----	----	----	----	----	----	----	----	----	----	----	----	----	----	----	----	----	----	----	----	----	----	----	----	----	----	----	----	----	----	----	----	----	----	----	----	----	----	----	----	----	----
PotVar0000759	A	G	AAAA	AAAG	AAAG	AAAA	AAAA	AAAA	AAAA	AAAG	AAAG	AAAA	AAAG	AAAA	AAAG	AAAA	AAAA	AAAA	AAAA	AAAA	AAAA	AAAA	AAAA	AAAG	AAAG	AAAA	AAAG	AAAG	AAAA	AAAA	AAAA	AAAA	AAAA	AAAA	AAAG	AAAA	AAAA	AAAA	AAAA	AAAA	AAAG	AAAA	AAAG	AAAA	AAAA	AAAA	AAAA	AAAA	AAAA
PotVar0000760	A	G	AAAA	AAAG	AAAG	AAAG	AAAG	AAGG	AAGG	AAAG	AAAA	AAGG	AAAG	AAAA	AAAG	AAAG	AAAG	AAAG	AAGG	AAGG	AAAG	AAAA	AAAG	AAAA	AAAA	AAGG	AAAA	AAAA	AAAA	AAAA	AAAG	AAAG	AAAG	AAAA	AAAA	AAAA	AAAA	AAAG	AAAA	AAAG	AAAG	AAAA	AAAG	AAAG	AAAG	AAAG	AAAA	AAAA	AAGG
PotVar0000767	T	G	GGGG	TGGG	TGGG	TGGG	TTGG	TTGG	TTGG	TGGG	GGGG	TTGG	TGGG	GGGG	TGGG	TGGG	TGGG	TGGG	TTGG	TTGG	TGGG	GGGG	TGGG	GGGG	GGGG	TTGG	GGGG	GGGG	GGGG	GGGG	TGGG	TGGG	TGGG	GGGG	GGGG	GGGG	TGGG	TGGG	GGGG	TGGG	TGGG	GGGG	TGGG	TGGG	TGGG	TGGG	GGGG	GGGG	TTGG
PotVar0000768	T	G	----	----	----	----	----	----	----	----	----	----	----	----	----	----	----	----	----	----	----	----	----	----	----	----	----	----	----	----	----	----	----	----	----	----	----	----	----	----	----	----	----	----	----	----	----	----	----
PotVar0000774	T	C	TTTT	TTTC	TTTC	TTTT	TTTT	TTTT	TTTT	TTTC	TTTC	TTTT	TTTC	TTTT	TTTC	TTTT	TTTT	TTTT	TTTT	TTTT	TTTT	TTTT	TTTT	----	TTTC	TTTT	TTTC	TTTC	TTTT	TTTT	TTTT	TTTT	TTTT	TTTT	TTTC	TTTT	TTTT	TTTT	TTTT	TTTT	TTTC	TTTT	TTTC	TTTT	TTTT	TTTT	TTTT	TTTT	TTTT
PotVar0000800	T	G	TTGG	TTTT	TTGG	TTTT	TTTT	TTTG	TTTG	TTTG	TTTT	TTTT	TTTG	TTTG	TTTG	TTTG	TTTT	TTGG	TTTG	TTGG	TTTT	TTTT	TTGG	TTTT	TTTT	TTTG	TTGG	TTGG	TTGG	TTGG	TTTT	TTGG	TTTG	TTGG	TTTT	TTTG	TTTT	TTTG	TTTT	TTTG	TTTG	TTTT	TTTG	TTGG	TTGG	TTTT	TGGG	TGGG	TTTG
PotVar0000802	T	C	----	----	----	----	----	----	----	----	----	----	----	----	----	----	----	----	----	----	----	----	----	----	----	----	----	----	----	----	----	----	----	----	----	----	----	----	----	----	----	----	----	----	----	----	----	----	----
PotVar0000805	A	G	AAGG	AGGG	GGGG	AGGG	GGGG	GGGG	GGGG	GGGG	GGGG	AGGG	AGGG	AGGG	GGGG	GGGG	GGGG	GGGG	GGGG	GGGG	GGGG	AGGG	GGGG	AGGG	GGGG	GGGG	GGGG	GGGG	GGGG	GGGG	GGGG	GGGG	AGGG	GGGG	GGGG	AGGG	AGGG	AGGG	AGGG	GGGG	GGGG	GGGG	GGGG	GGGG	GGGG	GGGG	GGGG	GGGG	GGGG
PotVar0000812	A	G	AAGG	AAGG	AAAG	AAGG	AAAG	AAAA	AAAA	----	AAGG	AAAG	AAGG	AGGG	AAAG	AAAA	AAGG	----	AAAG	AAAA	AAAG	AGGG	AAAA	----	AAAG	AAAG	AAAG	AAAG	AAGG	AAAG	AAGG	AAAA	AAAG	AAGG	AAAG	AAAG	AAAG	AAGG	AGGG	AAAG	AAAG	AAAG	AAGG	AAAG	AAAA	AAAG	AAAA	AAAA	AAAG
PotVar0000820	T	G	----	----	----	----	----	----	----	----	----	----	----	----	----	----	----	----	----	----	----	----	----	----	----	----	----	----	----	----	----	----	----	----	----	----	----	----	----	----	----	----	----	----	----	----	----	----	----
PotVar0000886	T	C	CCCC	TCCC	TCCC	CCCC	TCCC	CCCC	CCCC	TCCC	CCCC	CCCC	CCCC	CCCC	CCCC	CCCC	CCCC	TCCC	CCCC	CCCC	CCCC	CCCC	CCCC	CCCC	CCCC	CCCC	TCCC	TCCC	CCCC	CCCC	CCCC	CCCC	TCCC	CCCC	CCCC	CCCC	CCCC	CCCC	CCCC	TCCC	CCCC	CCCC	TCCC	CCCC	TCCC	CCCC	CCCC	TCCC	CCCC
PotVar0000996	A	G	AAAA	AAAG	AAAG	AAAA	AAAG	AAAA	AAAA	AAAG	AAAA	AAAA	AAAA	AAAA	AAAA	AAAA	AAAA	AAAG	AAAA	AAAA	AAAA	AAAA	AAAA	AAAA	AAAA	AAAA	AAAG	AAAG	AAAA	AAAA	AAAA	AAAA	AAAG	AAAA	AAAA	AAAA	AAAA	AAAA	AAAA	AAAG	AAAA	AAAA	AAAG	AAAA	AAAG	AAAA	AAAA	----	AAAA
PotVar0001003	T	G	TTTT	TTTT	TTTT	TTTG	TTTG	TTTT	TTTT	TTTT	TTTT	TTTT	TTTT	TTTG	TTTG	TTTT	TTTT	TTTT	TTTG	TTGG	TTTT	TTGG	TTTT	TTTT	TTTT	TTTG	TTTT	TTTT	TTTT	TTTT	TTTT	TTTT	TTTT	TTTT	TTTT	TTGG	TTTG	TTTG	TTGG	TTTG	TTTT	TTTG	TTTT	TTTT	TTTG	TTGG	TTTG	TTTT	TTTG
PotVar0001004	A	G	AAGG	AAAG	AAAG	AAAG	AAAG	AAAA	AAAG	AAAG	AAAG	AAGG	AAAA	AAAG	AAAG	AAAG	AAAG	AAAG	AAGG	AAAA	AAAG	AAAA	AAAG	AAAA	AAAA	AAAG	AAAG	AAAG	AAGG	AAAG	AAAG	AAAA	AAAA	AAGG	AAAA	AAAA	AAAA	AAAG	AAAG	AAAG	AAAA	AAAG	AAAG	AAGG	AAGG	AAAA	AAAA	AAAA	AAAG
PotVar0001006	A	G	AAAG	AGGG	AGGG	AAGG	AGGG	AGGG	AAGG	AGGG	AAGG	AAAG	AAAG	AAAG	AAGG	AGGG	AGGG	AAAG	AAGG	GGGG	AAGG	AGGG	AGGG	AGGG	GGGG	AAAG	AGGG	AGGG	AAAG	AGGG	AAGG	GGGG	AGGG	AAAA	GGGG	AGGG	GGGG	AAGG	AGGG	AGGG	AGGG	AGGG	AGGG	AAGG	AAGG	AGGG	GGGG	GGGG	AGGG
PotVar0001015	T	C	----	----	----	----	----	----	----	----	----	----	----	----	----	----	----	----	----	----	----	----	----	----	----	----	----	----	----	----	----	----	----	----	----	----	----	----	----	----	----	----	----	----	----	----	----	----	----
PotVar0001033	T	C	CCCC	CCCC	CCCC	CCCC	CCCC	CCCC	CCCC	CCCC	CCCC	CCCC	CCCC	CCCC	CCCC	CCCC	CCCC	CCCC	CCCC	CCCC	CCCC	CCCC	CCCC	CCCC	TCCC	CCCC	CCCC	CCCC	CCCC	CCCC	CCCC	CCCC	CCCC	CCCC	TCCC	CCCC	CCCC	CCCC	CCCC	CCCC	CCCC	CCCC	CCCC	CCCC	CCCC	CCCC	CCCC	CCCC	CCCC
PotVar0001067	T	C	TTTC	TTTC	TTCC	TTTC	TTTT	TTCC	TTCC	TTCC	TTTC	TTTC	TTTC	TTTT	TTTC	TCCC	TTTC	TTTT	TTTC	TTTT	TTCC	TTTC	TTCC	TTCC	TCCC	TTTT	TTTC	TTTC	TTTC	TTCC	TTTC	TTCC	TTTC	TTTT	TCCC	TTTT	TTTC	TTTC	TTTT	TTTC	TTCC	TTCC	TTCC	TTCC	TTTT	TTTC	TTCC	TTTC	TTCC
PotVar0001074	T	C	TTCC	TTTC	TTTC	TTCC	TCCC	TTTT	TTTC	TTTC	TTCC	TTCC	TTTT	TTCC	TTCC	TTTC	TCCC	TTTC	TCCC	CCCC	TTTC	TTCC	TTCC	TTTC	TTTC	TTCC	TTCC	TTCC	TTCC	TTTC	TTCC	TTTC	TTTT	TTCC	TTTC	TCCC	TCCC	TTCC	CCCC	TTCC	TTTC	TTCC	TTTC	TTCC	TCCC	TTCC	TTTC	TTTC	TTCC
PotVar0001097	T	C	----	----	----	----	----	----	----	----	----	----	----	----	----	----	----	----	----	----	----	----	----	----	----	----	----	----	----	----	----	----	----	----	----	----	----	----	----	----	----	----	----	----	----	----	----	----	----
PotVar0001127	T	G	----	----	----	----	----	----	----	----	----	----	----	----	----	----	----	----	----	----	----	----	----	----	----	----	----	----	----	----	----	----	----	----	----	----	----	----	----	----	----	----	----	----	----	----	----	----	----
PotVar0001136	A	G	----	----	----	----	----	----	----	----	----	----	----	----	----	----	----	----	----	----	----	----	----	----	----	----	----	----	----	----	----	----	----	----	----	----	----	----	----	----	----	----	----	----	----	----	----	----	----
PotVar0001163	A	C	----	----	----	----	----	----	----	----	----	----	----	----	----	----	----	----	----	----	----	----	----	----	----	----	----	----	----	----	----	----	----	----	----	----	----	----	----	----	----	----	----	----	----	----	----	----	----
PotVar0001186	A	G	GGGG	GGGG	GGGG	GGGG	GGGG	GGGG	GGGG	GGGG	AGGG	GGGG	GGGG	GGGG	GGGG	GGGG	GGGG	GGGG	GGGG	GGGG	GGGG	GGGG	GGGG	GGGG	GGGG	GGGG	GGGG	GGGG	GGGG	GGGG	AGGG	GGGG	GGGG	GGGG	GGGG	GGGG	GGGG	GGGG	GGGG	GGGG	GGGG	GGGG	GGGG	GGGG	GGGG	GGGG	GGGG	GGGG	GGGG
PotVar0001195	T	C	----	----	----	----	----	----	----	----	----	----	----	----	----	----	----	----	----	----	----	----	----	----	----	----	----	----	----	----	----	----	----	----	----	----	----	----	----	----	----	----	----	----	----	----	----	----	----
PotVar0001207	T	C	TTTT	TTTC	TTTT	TTTT	TTTT	TTTT	TTTT	TTTT	TTTT	TTTT	TTTT	TTTT	TTTT	TTTT	TTTT	TTTT	TTTT	TTTC	TTTT	TTTT	TTTT	TTTT	TTTT	TTTT	TTTT	TTTT	TTTT	TTTT	TTTT	TTTC	TTTC	TTTT	TTTT	TTTT	TTTT	TTTT	TTTT	TTTT	TTTT	TTTT	TTTT	TTTT	TTTT	TTTT	TTTC	TTTC	TTTT
PotVar0001208	A	C	----	----	----	----	----	----	----	----	----	----	----	----	----	----	----	----	----	----	----	----	----	----	----	----	----	----	----	----	----	----	----	----	----	----	----	----	----	----	----	----	----	----	----	----	----	----	----
PotVar0001214	T	G	TGGG	GGGG	GGGG	TGGG	GGGG	TGGG	TGGG	GGGG	GGGG	TGGG	TTTG	TTGG	TGGG	GGGG	GGGG	GGGG	GGGG	GGGG	TGGG	TGGG	GGGG	TGGG	GGGG	TGGG	GGGG	GGGG	GGGG	GGGG	GGGG	GGGG	TGGG	GGGG	GGGG	TGGG	GGGG	GGGG	GGGG	GGGG	TGGG	GGGG	GGGG	GGGG	GGGG	GGGG	GGGG	GGGG	GGGG
PotVar0001216	T	G	GGGG	TGGG	GGGG	GGGG	GGGG	GGGG	GGGG	GGGG	GGGG	GGGG	GGGG	GGGG	GGGG	GGGG	GGGG	GGGG	GGGG	TGGG	GGGG	GGGG	GGGG	GGGG	GGGG	GGGG	GGGG	GGGG	GGGG	GGGG	GGGG	TGGG	TGGG	GGGG	GGGG	GGGG	GGGG	GGGG	GGGG	GGGG	GGGG	GGGG	GGGG	GGGG	GGGG	GGGG	TGGG	TGGG	GGGG
PotVar0001227	A	G	AAGG	AAAG	AAGG	AAGG	AAAA	AGGG	AGGG	AAGG	AAGG	AAGG	GGGG	----	AAGG	AGGG	AAAG	AAGG	AAAG	AAAA	AGGG	AAGG	AAGG	----	AGGG	AAGG	AAAG	AAAG	AAGG	AGGG	AAGG	AAGG	AAGG	AAGG	AGGG	AAAG	----	AAGG	AAAA	AAAG	AGGG	AAGG	AAGG	AAGG	AAAA	AAGG	AAGG	AAAG	AAGG
PotVar0001239	A	G	AAAA	AAAA	AAAA	AAAA	AAAA	AAAA	AAAA	AAAA	AAAA	AAAA	AAAA	AAAA	AAAA	AAAA	AAAA	AAAA	AAAA	AAAA	AAAA	AAAA	AAAA	AAAA	AAAG	AAAA	AAAA	AAAA	AAAA	AAAA	AAAA	AAAA	AAAA	AAAA	AAAG	AAAA	AAAA	AAAA	AAAA	AAAA	AAAA	AAAA	AAAA	AAAA	AAAA	AAAA	AAAA	AAAA	AAAA
PotVar0001240	T	C	CCCC	CCCC	CCCC	TCCC	TCCC	CCCC	CCCC	CCCC	CCCC	CCCC	CCCC	TCCC	CCCC	CCCC	CCCC	CCCC	TCCC	TTCC	CCCC	TTCC	CCCC	CCCC	CCCC	TCCC	CCCC	CCCC	CCCC	CCCC	CCCC	CCCC	CCCC	CCCC	CCCC	TTCC	TCCC	TCCC	TTCC	TCCC	CCCC	TCCC	CCCC	CCCC	CCCC	TTCC	TCCC	CCCC	TCCC
PotVar0001247	A	G	AAGG	AGGG	AAGG	AAGG	GGGG	AAAG	AAAG	AAGG	AGGG	AAGG	AAAA	AAGG	AAGG	AAAG	AGGG	GGGG	AGGG	GGGG	AAAG	AAGG	AAGG	AAAG	AAAG	AGGG	AGGG	AGGG	AGGG	AAGG	AGGG	AAGG	AAGG	GGGG	AAAG	AGGG	AGGG	AGGG	GGGG	AGGG	AAAG	AAGG	AAGG	AAGG	GGGG	AGGG	AAGG	AGGG	AAGG
PotVar0001264	A	G	GGGG	AGGG	GGGG	GGGG	GGGG	GGGG	GGGG	GGGG	GGGG	GGGG	GGGG	GGGG	GGGG	GGGG	GGGG	GGGG	GGGG	----	GGGG	GGGG	GGGG	GGGG	GGGG	GGGG	GGGG	GGGG	GGGG	GGGG	GGGG	AGGG	AGGG	GGGG	GGGG	GGGG	GGGG	GGGG	GGGG	GGGG	GGGG	GGGG	GGGG	GGGG	GGGG	GGGG	AGGG	AGGG	GGGG
PotVar0001266	T	C	CCCC	CCCC	CCCC	CCCC	TCCC	CCCC	CCCC	CCCC	TCCC	CCCC	CCCC	CCCC	CCCC	CCCC	TTCC	CCCC	CCCC	TCCC	CCCC	CCCC	CCCC	TCCC	CCCC	CCCC	CCCC	CCCC	CCCC	CCCC	TCCC	TCCC	CCCC	CCCC	CCCC	TCCC	TCCC	CCCC	TCCC	CCCC	TCCC	CCCC	CCCC	CCCC	CCCC	CCCC	CCCC	TCCC	CCCC
PotVar0001268	A	C	----	----	----	----	----	----	----	----	----	----	----	----	----	----	----	----	----	----	----	----	----	----	----	----	----	----	----	----	----	----	----	----	----	----	----	----	----	----	----	----	----	----	----	----	----	----	----
PotVar0001270	T	C	CCCC	CCCC	CCCC	CCCC	CCCC	CCCC	CCCC	CCCC	CCCC	CCCC	CCCC	CCCC	CCCC	CCCC	CCCC	CCCC	CCCC	CCCC	CCCC	CCCC	CCCC	CCCC	CCCC	CCCC	CCCC	CCCC	CCCC	CCCC	CCCC	CCCC	CCCC	CCCC	CCCC	CCCC	CCCC	CCCC	CCCC	CCCC	CCCC	CCCC	CCCC	CCCC	CCCC	CCCC	CCCC	CCCC	CCCC
PotVar0001271	T	C	----	----	----	----	----	----	----	----	----	----	----	----	----	----	----	----	----	----	----	----	----	----	----	----	----	----	----	----	----	----	----	----	----	----	----	----	----	----	----	----	----	----	----	----	----	----	----
PotVar0001272	T	C	----	TTCC	TTCC	TTCC	CCCC	TTTC	TTTC	TTCC	TTCC	TTCC	TTTT	TTCC	TTCC	TTTC	TCCC	TTCC	TCCC	TCCC	TTTC	TTCC	TTCC	TTCC	TTTC	TTCC	TCCC	TCCC	TTCC	TTTC	TTCC	TTTC	TTTC	----	TTTC	TCCC	TCCC	TTCC	CCCC	TCCC	TTTC	TTCC	TTCC	----	CCCC	TTCC	TTTC	TTCC	TTCC
PotVar0001276	A	G	GGGG	GGGG	GGGG	GGGG	AGGG	GGGG	GGGG	GGGG	AGGG	GGGG	GGGG	GGGG	GGGG	GGGG	AAGG	GGGG	GGGG	AGGG	GGGG	GGGG	AGGG	AGGG	GGGG	GGGG	GGGG	GGGG	GGGG	GGGG	AGGG	AGGG	GGGG	GGGG	GGGG	AGGG	AGGG	GGGG	AGGG	GGGG	AGGG	GGGG	GGGG	GGGG	GGGG	GGGG	GGGG	AGGG	GGGG
PotVar0001283	A	G	GGGG	GGGG	GGGG	GGGG	GGGG	GGGG	GGGG	GGGG	GGGG	GGGG	GGGG	GGGG	GGGG	GGGG	GGGG	GGGG	GGGG	GGGG	GGGG	GGGG	GGGG	GGGG	AGGG	GGGG	GGGG	GGGG	GGGG	GGGG	GGGG	GGGG	GGGG	GGGG	AGGG	GGGG	AGGG	GGGG	GGGG	GGGG	GGGG	GGGG	GGGG	GGGG	GGGG	GGGG	GGGG	GGGG	GGGG
PotVar0001284	A	G	GGGG	AGGG	GGGG	GGGG	GGGG	GGGG	GGGG	GGGG	GGGG	GGGG	GGGG	GGGG	GGGG	GGGG	GGGG	GGGG	GGGG	AGGG	GGGG	GGGG	GGGG	GGGG	GGGG	GGGG	GGGG	GGGG	GGGG	GGGG	GGGG	AGGG	AGGG	GGGG	GGGG	GGGG	GGGG	GGGG	GGGG	GGGG	GGGG	GGGG	GGGG	GGGG	GGGG	GGGG	AGGG	AGGG	GGGG
PotVar0001285	T	C	TTTT	TTTC	TTTC	TTTT	TTTC	TTTT	TTTT	TTTC	TTTT	TTTT	TTTT	TTTT	TTTT	TTTT	TTTT	TTTC	TTTT	TTTT	TTTT	TTTT	TTTT	TTTT	TTTT	TTTT	TTTC	TTTC	TTTT	TTTT	TTTT	TTTT	TTTC	TTTT	TTTT	TTTT	TTTT	TTTT	TTTT	TTTC	TTTT	TTTT	TTTC	TTTT	TTTC	TTTT	TTTT	TTTC	TTTT
PotVar0001290	T	G	TTGG	TTTG	TTTG	TTTG	TTTG	TTTT	TTTG	TTTG	TTTG	TTGG	TTTT	TTTG	TTTG	TTTG	TTTG	TTTG	TTGG	TTTT	TTTG	TTTT	TTTG	----	TTTT	TTTG	TTTG	TTTG	TTGG	TTTG	TTTG	TTTT	TTTT	TTGG	TTTT	TTTT	TTTT	TTTG	TTTG	TTTG	TTTT	TTTG	TTTG	TTGG	TTGG	TTTT	TTTT	TTTT	TTTG
PotVar0001295	T	C	TTCC	TTCC	TTTC	TTCC	TCCC	TTTC	TTTC	TTTC	TTCC	TTCC	TTTT	TTCC	TTCC	TTTC	TCCC	TTTC	TCCC	CCCC	TTTC	TTCC	TTCC	TTTC	TTTC	TTCC	TTCC	TTCC	TTCC	TTTC	TTCC	TTCC	TTTC	TTCC	TTTC	TCCC	TCCC	TTCC	CCCC	TTCC	TTTC	TTCC	TTTC	TTCC	TCCC	TTCC	TTCC	TTCC	TTCC
PotVar0001297	T	C	CCCC	CCCC	CCCC	TCCC	TCCC	CCCC	CCCC	CCCC	CCCC	CCCC	CCCC	TCCC	TCCC	CCCC	CCCC	CCCC	TCCC	TTCC	CCCC	TTCC	CCCC	CCCC	CCCC	TCCC	CCCC	CCCC	CCCC	CCCC	CCCC	CCCC	CCCC	CCCC	CCCC	TTCC	TCCC	TCCC	TTCC	TCCC	CCCC	TCCC	CCCC	CCCC	TCCC	TTCC	TCCC	CCCC	TCCC
PotVar0001308	T	G	TTTT	TTTT	TTTT	TTTT	TTTT	TTTT	TTTT	TTTT	TTTT	TTTT	TTTT	TTTT	TTTT	TTTT	TTTT	TTGG	TTTT	TTTT	TTTT	TTTT	TTTT	TTTT	TTTT	TTTG	TTTT	TTTT	TTTG	TTTG	TTTT	TTTT	TTTT	TTGG	TTTT	TTTT	TTTT	TTTG	TTTT	TTTT	TTTT	TTTT	TTTT	TTTT	TTTT	TTTG	TTTT	TTTT	TTTT
PotVar0001310	A	G	GGGG	GGGG	GGGG	AGGG	AGGG	GGGG	GGGG	GGGG	GGGG	GGGG	GGGG	AGGG	AGGG	GGGG	GGGG	GGGG	AGGG	AAGG	GGGG	AAGG	GGGG	GGGG	AGGG	AGGG	GGGG	GGGG	GGGG	GGGG	GGGG	GGGG	GGGG	GGGG	AGGG	AAGG	AGGG	AGGG	AAGG	AGGG	GGGG	AGGG	GGGG	GGGG	AGGG	AAGG	AGGG	GGGG	AGGG
PotVar0001316	A	G	GGGG	AGGG	GGGG	GGGG	GGGG	GGGG	GGGG	GGGG	GGGG	GGGG	GGGG	GGGG	GGGG	GGGG	GGGG	GGGG	GGGG	AGGG	GGGG	GGGG	GGGG	GGGG	GGGG	GGGG	GGGG	GGGG	GGGG	GGGG	GGGG	AGGG	AGGG	GGGG	GGGG	GGGG	GGGG	GGGG	GGGG	GGGG	GGGG	GGGG	GGGG	GGGG	GGGG	GGGG	AGGG	AGGG	GGGG
PotVar0001317	A	G	AAGG	AGGG	AAGG	AAGG	GGGG	AAAG	AAAG	AAGG	AAGG	AAGG	AAAA	AAGG	AAGG	AAAG	AGGG	AAGG	AGGG	GGGG	AAAG	AAGG	AAGG	AAAG	AAAG	AAGG	AGGG	AGGG	AAGG	AAAG	AAGG	AAGG	AAGG	AAGG	AAAG	AGGG	AGGG	AAGG	GGGG	AGGG	AAAG	AAGG	AAGG	AAGG	GGGG	AAGG	AAGG	AGGG	AAGG
PotVar0001318	A	C	ACCC	ACCC	AACC	ACCC	CCCC	AACC	AACC	AACC	ACCC	ACCC	ACCC	CCCC	ACCC	AAAC	ACCC	CCCC	ACCC	CCCC	AACC	ACCC	AACC	AACC	AAAC	CCCC	ACCC	ACCC	ACCC	AACC	ACCC	AACC	ACCC	CCCC	AAAC	CCCC	ACCC	ACCC	CCCC	ACCC	AACC	AACC	AACC	AACC	CCCC	ACCC	AACC	ACCC	AACC
PotVar0001324	T	C	TTTT	TTTT	TTTT	TTTT	TTTT	TTTT	TTTT	TTTT	TTTT	TTTT	TTTT	TTTT	TTTT	TTTT	TTTT	TTTT	TTTT	TTTT	TTTT	TTTT	TTTT	TTTT	TTTT	TTTT	TTTT	TTTT	TTTT	TTTT	TTTT	TTTT	TTTT	TTTT	TTTT	TTTT	TTTT	TTTT	TTTT	TTTT	TTTT	TTTT	TTTT	TTTT	TTTT	TTTT	TTTT	TTTT	TTTT
PotVar0001342	A	G	GGGG	GGGG	GGGG	AGGG	AGGG	GGGG	GGGG	GGGG	GGGG	GGGG	GGGG	AGGG	AGGG	GGGG	GGGG	GGGG	AGGG	AAGG	GGGG	AAGG	GGGG	GGGG	GGGG	AGGG	GGGG	GGGG	GGGG	GGGG	GGGG	GGGG	GGGG	GGGG	GGGG	AAGG	AGGG	AGGG	AAGG	AGGG	GGGG	AGGG	GGGG	GGGG	AGGG	AAGG	AGGG	GGGG	AGGG
PotVar0001357	T	G	GGGG	TGGG	GGGG	GGGG	GGGG	GGGG	GGGG	GGGG	GGGG	GGGG	GGGG	GGGG	GGGG	GGGG	GGGG	GGGG	GGGG	TGGG	GGGG	GGGG	GGGG	GGGG	GGGG	GGGG	GGGG	GGGG	GGGG	GGGG	GGGG	TGGG	TGGG	GGGG	GGGG	GGGG	GGGG	GGGG	GGGG	GGGG	GGGG	GGGG	GGGG	GGGG	GGGG	GGGG	TGGG	TGGG	GGGG
PotVar0001360	A	C	AACC	AAAC	AACC	AACC	AAAA	ACCC	ACCC	AACC	AAAC	AACC	CCCC	AACC	AACC	ACCC	AAAC	AAAA	AAAC	AAAA	ACCC	AACC	AACC	----	ACCC	AAAC	AAAC	AAAC	AAAC	AACC	AACC	AACC	AACC	AAAA	ACCC	AAAC	AAAC	AAAC	AAAA	AAAC	ACCC	AACC	AACC	AACC	AAAA	AAAC	AACC	AAAC	AACC
PotVar0001376	A	C	CCCC	CCCC	CCCC	CCCC	ACCC	CCCC	CCCC	CCCC	ACCC	CCCC	CCCC	CCCC	CCCC	CCCC	AACC	CCCC	CCCC	ACCC	CCCC	CCCC	ACCC	ACCC	CCCC	CCCC	CCCC	CCCC	CCCC	CCCC	ACCC	ACCC	CCCC	CCCC	CCCC	ACCC	AACC	CCCC	ACCC	CCCC	ACCC	CCCC	CCCC	CCCC	CCCC	CCCC	CCCC	ACCC	CCCC
PotVar0001385	T	C	CCCC	TCCC	TCCC	CCCC	TCCC	CCCC	CCCC	TCCC	CCCC	CCCC	CCCC	CCCC	CCCC	CCCC	CCCC	TTTC	CCCC	CCCC	CCCC	CCCC	CCCC	CCCC	CCCC	TCCC	TCCC	TCCC	TCCC	TCCC	CCCC	CCCC	TCCC	TTCC	CCCC	CCCC	TCCC	TCCC	CCCC	TCCC	CCCC	CCCC	TCCC	CCCC	TCCC	TCCC	CCCC	TCCC	CCCC
PotVar0001413	A	C	----	----	----	----	----	----	----	----	----	----	----	----	----	----	----	----	----	----	----	----	----	----	----	----	----	----	----	----	----	----	----	----	----	----	----	----	----	----	----	----	----	----	----	----	----	----	----
PotVar0001415	A	G	----	----	----	----	----	----	----	----	----	----	----	----	----	----	----	----	----	----	----	----	----	----	----	----	----	----	----	----	----	----	----	----	----	----	----	----	----	----	----	----	----	----	----	----	----	----	----
PotVar0001435	A	G	AAAA	AAAA	AAAA	AAAA	AAAG	AAAA	AAAA	AAAA	AAAG	AAAA	AAAA	AAAA	AAAA	AAAA	AAGG	AAAA	AAAA	AAAG	AAAA	AAAA	AAAG	AAAG	AAAA	AAAA	AAAA	AAAA	AAAA	AAAA	AAAG	AAAG	AAAA	AAAA	AAAA	AAAG	AAAG	AAAA	AAAG	AAAA	AAAG	AAAA	AAAA	AAAA	AAAA	AAAA	AAAA	AAAG	AAAA
PotVar0001436	T	C	TTCC	TTCC	TTTC	TTCC	TTCC	TTTC	TTTC	TTTC	TTTC	TTCC	TTTT	TTCC	TTCC	TTTC	TTTC	TTTC	TCCC	TCCC	TTTC	TTCC	TTTC	----	TTTC	TTCC	TTCC	TTCC	TTCC	TTTC	TTTC	TTTC	TTTC	TTCC	TTTC	TTCC	TTTC	TTCC	TCCC	TTCC	TTTT	TTCC	TTTC	TTCC	TCCC	TTCC	TTCC	TTTC	TTCC
PotVar0001451	A	G	AAGG	AGGG	AAGG	AAGG	GGGG	AAAG	AAAG	AAGG	AAGG	AAGG	AAAA	AAGG	AAGG	AAAG	AGGG	GGGG	AGGG	GGGG	AAAG	AAGG	AAGG	----	AAAG	AGGG	AGGG	AGGG	AGGG	AAGG	AAGG	AAGG	AAGG	GGGG	AAAG	AGGG	AGGG	AGGG	GGGG	AGGG	AAAG	AAGG	AAGG	AAGG	GGGG	AGGG	AAGG	AGGG	AAGG
PotVar0001495	A	G	----	----	----	----	----	----	----	----	----	----	----	----	----	----	----	----	----	----	----	----	----	----	----	----	----	----	----	----	----	----	----	----	----	----	----	----	----	----	----	----	----	----	----	----	----	----	----
PotVar0001513	T	G	TGGG	GGGG	GGGG	TGGG	GGGG	TGGG	TGGG	GGGG	TGGG	TGGG	TTTG	TTGG	TGGG	GGGG	GGGG	TTGG	GGGG	GGGG	TGGG	TGGG	GGGG	----	GGGG	TTGG	GGGG	GGGG	TGGG	TGGG	GGGG	GGGG	TGGG	TTGG	GGGG	TGGG	GGGG	TGGG	GGGG	GGGG	TGGG	GGGG	GGGG	GGGG	GGGG	TGGG	GGGG	GGGG	GGGG
PotVar0001523	T	G	GGGG	TGGG	GGGG	GGGG	GGGG	GGGG	GGGG	GGGG	GGGG	GGGG	GGGG	GGGG	GGGG	GGGG	GGGG	GGGG	GGGG	TGGG	GGGG	GGGG	GGGG	GGGG	GGGG	GGGG	GGGG	GGGG	GGGG	GGGG	GGGG	TGGG	TGGG	GGGG	GGGG	GGGG	GGGG	GGGG	GGGG	GGGG	GGGG	GGGG	GGGG	GGGG	GGGG	GGGG	TGGG	TGGG	GGGG
PotVar0001524	A	G	AAAA	AAAG	AAAA	AAAA	AAAA	AAAA	AAAA	AAAA	AAAA	AAAA	AAAA	AAAA	AAAA	AAAA	AAAA	AAAA	AAAA	AAAG	AAAA	AAAA	AAAA	AAAA	AAAA	AAAA	AAAA	AAAA	AAAA	AAAA	AAAA	AAAG	AAAG	AAAA	AAAA	AAAA	AAAA	AAAA	AAAA	AAAA	AAAA	AAAA	AAAA	AAAA	AAAA	AAAA	AAAG	AAAG	AAAA
PotVar0001525	A	C	AAAC	AAAC	AACC	AAAC	AAAA	AACC	AACC	AACC	AAAC	AAAC	AAAC	AAAA	AAAC	ACCC	AAAC	AAAA	AAAC	AAAA	AACC	AAAC	AACC	AACC	ACCC	AAAA	AAAC	AAAC	AAAC	AACC	AAAC	AACC	AAAC	AAAA	ACCC	AAAA	AAAC	AAAC	AAAA	AAAC	AACC	AACC	AACC	AACC	AAAA	AAAC	AACC	AAAC	AACC
PotVar0001526	A	G	AAAA	AAAA	AAAA	AAAG	AAAG	AAAA	AAAA	AAAA	AAAA	AAAA	AAAA	AAAG	AAAG	AAAA	AAAA	AAAA	AAAG	AAGG	AAAA	AAGG	AAAA	AAAA	AAAA	AAAG	AAAA	AAAA	AAAA	AAAA	AAAA	AAAA	AAAA	AAAA	AAAA	AAGG	AAAG	AAAG	AAGG	AAAG	AAAA	AAAG	AAAA	AAAA	AAAG	AAGG	AAAG	AAAA	AAAG
PotVar0001530	A	G	AAGG	AAGG	AAAG	AAGG	AGGG	AAAG	AAAG	AAAG	AAGG	AAGG	AAAA	AAGG	AAGG	AAAG	AGGG	AAAG	AGGG	GGGG	AAAG	AAGG	AAGG	AAAG	AAAG	AAGG	AAGG	AAGG	AAGG	AAAG	AAGG	AAGG	AAAG	AAGG	AAAG	AGGG	AGGG	AAGG	GGGG	AAGG	AAAG	AAGG	AAAG	AAGG	AGGG	AAGG	AAGG	AAGG	AAGG
PotVar0001550	A	G	AGGG	AAGG	GGGG	AGGG	AGGG	AAGG	GGGG	GGGG	AGGG	AGGG	AGGG	GGGG	GGGG	GGGG	AAGG	GGGG	AGGG	AAGG	GGGG	GGGG	GGGG	----	AAGG	GGGG	AGGG	AGGG	GGGG	GGGG	GGGG	AGGG	GGGG	GGGG	AAGG	AAGG	GGGG	GGGG	GGGG	GGGG	AGGG	GGGG	AGGG	GGGG	GGGG	AGGG	GGGG	GGGG	GGGG
PotVar0001551	T	G	TTTT	TTTT	TTTT	TTTT	TTTT	TTTT	TTTT	TTTT	TTTT	TTTT	TTTT	TTTT	TTTT	TTTT	TTTT	TTTT	TTTT	TTTT	TTTT	TTTT	TTTT	TTTT	TTTT	TTTT	TTTT	TTTT	TTTT	TTTT	TTTT	TTTT	TTTT	TTTT	TTTT	TTTT	TTTT	TTTT	TTTT	TTTT	TTTT	TTTT	TTTT	TTTT	TTTT	TTTT	TTTT	TTTT	TTTT
PotVar0001568	A	G	----	----	----	----	----	----	----	----	----	----	----	----	----	----	----	----	----	----	----	----	----	----	----	----	----	----	----	----	----	----	----	----	----	----	----	----	----	----	----	----	----	----	----	----	----	----	----
PotVar0001571	A	G	AAAG	AAGG	AGGG	AGGG	AAGG	GGGG	AAGG	AAGG	AGGG	AAGG	AGGG	AAGG	AAGG	AGGG	AAGG	AAAA	AGGG	AAGG	AGGG	AGGG	AAGG	AAGG	AGGG	AAAG	AGGG	AGGG	AAAG	AAGG	AGGG	AGGG	AAGG	AAAG	AGGG	AAGG	AAAG	AAAG	AGGG	AGGG	AGGG	GGGG	AAGG	AAAA	GGGG	AAGG	AAAG	AAGG	AGGG
PotVar0001573	A	G	GGGG	GGGG	GGGG	GGGG	GGGG	GGGG	GGGG	GGGG	GGGG	GGGG	AGGG	GGGG	GGGG	GGGG	GGGG	GGGG	GGGG	GGGG	GGGG	GGGG	GGGG	GGGG	AGGG	GGGG	AGGG	AGGG	GGGG	GGGG	GGGG	GGGG	GGGG	GGGG	AGGG	GGGG	GGGG	GGGG	GGGG	GGGG	GGGG	GGGG	GGGG	GGGG	GGGG	AGGG	GGGG	GGGG	GGGG
PotVar0001581	A	G	GGGG	GGGG	AAGG	AGGG	AGGG	AGGG	AGGG	AGGG	AGGG	GGGG	AGGG	GGGG	AAGG	GGGG	AAGG	GGGG	AGGG	AGGG	AAGG	AAGG	AGGG	GGGG	AGGG	AGGG	AGGG	AGGG	AGGG	----	AGGG	AGGG	AAGG	AGGG	AGGG	AAGG	GGGG	GGGG	GGGG	AGGG	AGGG	AAGG	GGGG	GGGG	AAGG	AGGG	AGGG	AAGG	AGGG
PotVar0001594	A	G	AAAA	AAAA	AAAA	AAAA	AAAA	AAAA	AAAA	AAAA	AAAA	AAAA	AAAA	AAAA	AAAA	AAAA	AAAA	AAAA	AAAA	AAAA	AAAA	AAAA	AAAA	AAAA	AAAA	AAAA	AAAA	AAAA	AAAA	AAAA	AAAA	AAAA	AAAA	AAAA	AAAA	AAAA	AAAA	AAAA	AAAA	AAAA	AAAA	AAAA	AAAA	AAAA	AAAA	AAAA	AAAA	AAAA	AAAA
PotVar0001601	A	G	----	----	----	----	----	----	----	----	----	----	----	----	----	----	----	----	----	----	----	----	----	----	----	----	----	----	----	----	----	----	----	----	----	----	----	----	----	----	----	----	----	----	----	----	----	----	----
PotVar0001611	T	C	CCCC	CCCC	CCCC	CCCC	CCCC	CCCC	TCCC	CCCC	CCCC	CCCC	CCCC	CCCC	TTCC	CCCC	CCCC	CCCC	CCCC	CCCC	TCCC	CCCC	CCCC	CCCC	CCCC	CCCC	CCCC	CCCC	CCCC	CCCC	CCCC	CCCC	CCCC	CCCC	CCCC	CCCC	CCCC	CCCC	CCCC	TCCC	CCCC	CCCC	CCCC	CCCC	CCCC	CCCC	TCCC	CCCC	CCCC
PotVar0001615	T	G	----	----	----	----	----	----	----	----	----	----	----	----	----	----	----	----	----	----	----	----	----	----	----	----	----	----	----	----	----	----	----	----	----	----	----	----	----	----	----	----	----	----	----	----	----	----	----
PotVar0001625	A	G	GGGG	GGGG	AAGG	AGGG	AGGG	AGGG	AGGG	AGGG	AGGG	GGGG	GGGG	GGGG	AAGG	GGGG	AGGG	GGGG	AGGG	AGGG	AAGG	AAGG	AGGG	GGGG	GGGG	AGGG	GGGG	GGGG	AGGG	AGGG	AGGG	AGGG	AAGG	AGGG	GGGG	AAGG	GGGG	GGGG	GGGG	AGGG	AGGG	AAGG	GGGG	GGGG	AAGG	GGGG	AGGG	AAGG	AGGG
PotVar0001652	T	C	CCCC	CCCC	CCCC	CCCC	CCCC	CCCC	CCCC	CCCC	CCCC	CCCC	CCCC	CCCC	CCCC	CCCC	TCCC	CCCC	CCCC	CCCC	CCCC	CCCC	CCCC	CCCC	CCCC	CCCC	CCCC	CCCC	CCCC	CCCC	CCCC	CCCC	CCCC	CCCC	CCCC	CCCC	CCCC	CCCC	CCCC	CCCC	CCCC	CCCC	CCCC	CCCC	CCCC	CCCC	CCCC	CCCC	CCCC
PotVar0001654	A	G	----	----	----	----	----	----	----	----	----	----	----	----	----	----	----	----	----	----	----	----	----	----	----	----	----	----	----	----	----	----	----	----	----	----	----	----	----	----	----	----	----	----	----	----	----	----	----
PotVar0001673	A	G	----	----	----	----	----	----	----	----	----	----	----	----	----	----	----	----	----	----	----	----	----	----	----	----	----	----	----	----	----	----	----	----	----	----	----	----	----	----	----	----	----	----	----	----	----	----	----
PotVar0001686	A	G	AAAA	AAAA	AAGG	AAAA	AAAA	AAAG	AAAA	AAAG	AAAG	AAAA	AAAA	AAAA	AAAA	AAAA	AAAA	AAAA	AAAA	AAAA	AAAG	AAGG	AAAG	AAAA	AAAA	AAAG	AAAA	AAAA	AAAG	----	AAAG	AAAG	AAGG	AAAG	AAAA	AAAA	AAAA	AAAA	AAAA	AAAA	AAAG	AAAG	AAAA	AAAA	AAGG	AAAA	AAAA	AAGG	AAAG
PotVar0001694	A	G	----	----	----	----	----	----	----	----	----	----	----	----	----	----	----	----	----	----	----	----	----	----	----	----	----	----	----	----	----	----	----	----	----	----	----	----	----	----	----	----	----	----	----	----	----	----	----
PotVar0001704	T	C	TCCC	CCCC	CCCC	CCCC	TCCC	TTCC	CCCC	CCCC	CCCC	TCCC	CCCC	CCCC	CCCC	CCCC	CCCC	CCCC	TCCC	TTCC	CCCC	CCCC	CCCC	TCCC	TCCC	CCCC	CCCC	CCCC	CCCC	CCCC	CCCC	TCCC	CCCC	CCCC	TCCC	TTCC	CCCC	CCCC	CCCC	CCCC	TCCC	CCCC	TCCC	CCCC	CCCC	CCCC	CCCC	CCCC	CCCC
PotVar0001707	T	C	----	----	----	----	----	----	----	----	----	----	----	----	----	----	----	----	----	----	----	----	----	----	----	----	----	----	----	----	----	----	----	----	----	----	----	----	----	----	----	----	----	----	----	----	----	----	----
PotVar0001710	A	G	AAAG	AAAA	AAGG	AAGG	AAAG	AAGG	AGGG	AAAG	AGGG	AAAG	GGGG	AGGG	AGGG	GGGG	AAGG	AAGG	AAGG	AAAG	AAGG	AAAG	AAGG	AAAG	AAGG	AGGG	AAGG	AAGG	AGGG	AGGG	AAGG	AAGG	AAAA	AAGG	AAGG	AAGG	AAAG	AAGG	AAGG	AAGG	AAGG	AGGG	AAAG	AAGG	AAGG	AGGG	AAAG	AAAA	AAGG
PotVar0001739	T	C	----	----	----	----	----	----	----	----	----	----	----	----	----	----	----	----	----	----	----	----	----	----	----	----	----	----	----	----	----	----	----	----	----	----	----	----	----	----	----	----	----	----	----	----	----	----	----
PotVar0001749	A	G	AAAG	AAAA	AAAA	AAAA	AAAA	AAGG	AAAA	AAAA	AAAA	AAAG	AAAA	AAAA	AAAA	AAAA	AAAA	AAAA	AAAA	AAAG	AAAA	AAAA	AAAA	AAAG	AAAG	AAAA	AAAA	AAAA	AAAA	AAAA	AAAA	AAAG	AAAA	AAAA	AAAG	AAGG	AAAA	AAAA	AAAA	AAAA	AAAG	AAAA	AAAG	AAAA	AAAA	AAAA	AAAA	AAAA	AAAA
PotVar0001780	A	G	AGGG	AAGG	AAGG	AAGG	AGGG	AAGG	AAAG	AGGG	AAAA	AGGG	AAAA	AAGG	AAAG	AAAA	AGGG	AAGG	AAGG	AGGG	AAGG	AGGG	AAGG	AGGG	AAGG	AAAG	AGGG	AGGG	AAAG	AAAG	AAGG	AAGG	GGGG	AAGG	AAGG	AAGG	AGGG	AAGG	AAGG	AAGG	AAGG	AAAA	AGGG	AAGG	AAGG	AAGG	AGGG	GGGG	AAGG
PotVar0001789	T	C	TCCC	CCCC	CCCC	TCCC	TCCC	TTCC	CCCC	CCCC	CCCC	TCCC	CCCC	CCCC	CCCC	CCCC	TCCC	CCCC	TCCC	TTCC	CCCC	CCCC	CCCC	TCCC	TCCC	CCCC	CCCC	CCCC	CCCC	CCCC	CCCC	TCCC	CCCC	CCCC	TCCC	CCCC	CCCC	CCCC	CCCC	CCCC	TCCC	CCCC	TCCC	CCCC	CCCC	CCCC	CCCC	CCCC	CCCC
PotVar0001799	T	C	TCCC	TTCC	TTTC	----	CCCC	TTCC	TTCC	CCCC	TTTC	CCCC	TTCC	CCCC	TTTC	TTTC	TCCC	TTCC	TCCC	TCCC	TTTC	TTCC	TTTC	CCCC	CCCC	TTTC	TCCC	TCCC	TTTC	TTTC	TCCC	TCCC	TCCC	TTCC	CCCC	CCCC	CCCC	TTCC	TCCC	TTCC	TCCC	TCCC	TCCC	TTCC	TTTC	TTCC	TCCC	TTCC	TCCC
PotVar0001811	A	G	----	----	----	----	----	----	----	----	----	----	----	----	----	----	----	----	----	----	----	----	----	----	----	----	----	----	----	----	----	----	----	----	----	----	----	----	----	----	----	----	----	----	----	----	----	----	----
PotVar0001818	A	G	AAAA	AAAA	AAAA	AAAA	AAAA	AAAA	AAAA	AAAA	AAAA	AAAA	AAAA	AAAA	AAAA	AAAA	AAAA	AAAA	AAAA	AAAA	AAAA	AAAA	AAAA	AAAA	AAAA	AAAA	AAAA	AAAA	AAAA	AAAA	AAAA	AAAA	AAAA	AAAA	AAAA	AAAA	AAAA	AAAA	AAAA	AAAA	AAAA	AAAA	AAAA	AAAA	AAAA	AAAA	AAAA	AAAA	AAAA
PotVar0001826	A	C	----	----	----	----	----	----	----	----	----	----	----	----	----	----	----	----	----	----	----	----	----	----	----	----	----	----	----	----	----	----	----	----	----	----	----	----	----	----	----	----	----	----	----	----	----	----	----
PotVar0001827	A	G	----	----	----	----	----	----	----	----	----	----	----	----	----	----	----	----	----	----	----	----	----	----	----	----	----	----	----	----	----	----	----	----	----	----	----	----	----	----	----	----	----	----	----	----	----	----	----
PotVar0001856	A	G	----	----	----	----	----	----	----	----	----	----	----	----	----	----	----	----	----	----	----	----	----	----	----	----	----	----	----	----	----	----	----	----	----	----	----	----	----	----	----	----	----	----	----	----	----	----	----
PotVar0001875	A	C	----	----	----	----	----	----	----	----	----	----	----	----	----	----	----	----	----	----	----	----	----	----	----	----	----	----	----	----	----	----	----	----	----	----	----	----	----	----	----	----	----	----	----	----	----	----	----
PotVar0001888	T	C	----	----	----	----	----	----	----	----	----	----	----	----	----	----	----	----	----	----	----	----	----	----	----	----	----	----	----	----	----	----	----	----	----	----	----	----	----	----	----	----	----	----	----	----	----	----	----
PotVar0001891	T	C	----	----	----	----	----	----	----	----	----	----	----	----	----	----	----	----	----	----	----	----	----	----	----	----	----	----	----	----	----	----	----	----	----	----	----	----	----	----	----	----	----	----	----	----	----	----	----
PotVar0001921	T	C	TTTC	TTTT	TTTT	TTTC	TTTC	TTCC	TTTT	TTTT	TTTT	TTTC	TTTT	TTTT	TTTT	TTTT	TTTC	TTTT	TTTC	TTCC	TTTT	TTTT	TTTT	TTTC	TTTC	TTTT	TTTT	TTTT	TTTT	TTTT	TTTT	TTTC	TTTT	TTTT	TTTC	TTCC	TTTT	TTTT	TTTT	TTTT	TTTC	TTTT	TTTC	TTTT	TTTT	TTTT	TTTT	TTTT	TTTT
PotVar0001923	T	C	TTTT	TTTT	TTTT	TTTT	TTTT	TTTT	TTTT	TTTT	TTTT	TTTT	TTTT	TTTT	TTTT	TTTT	TTTC	TTTT	TTTT	TTTT	TTTT	TTTT	TTTT	TTTT	TTTT	TTTT	TTTT	TTTT	TTTT	TTTT	TTTT	TTTT	TTTT	TTTT	TTTT	TTTT	TTTT	TTTT	TTTT	TTTT	TTTT	TTTT	TTTT	TTTT	TTTT	TTTT	TTTT	TTTT	TTTT
PotVar0001960	A	C	CCCC	CCCC	CCCC	CCCC	ACCC	CCCC	CCCC	CCCC	CCCC	CCCC	CCCC	CCCC	CCCC	CCCC	CCCC	CCCC	ACCC	ACCC	CCCC	CCCC	CCCC	CCCC	CCCC	CCCC	CCCC	CCCC	CCCC	CCCC	CCCC	CCCC	CCCC	CCCC	CCCC	CCCC	CCCC	CCCC	CCCC	CCCC	CCCC	CCCC	CCCC	CCCC	CCCC	CCCC	CCCC	CCCC	CCCC
PotVar0001969	T	C	CCCC	CCCC	CCCC	CCCC	CCCC	CCCC	CCCC	CCCC	CCCC	CCCC	CCCC	CCCC	CCCC	CCCC	CCCC	CCCC	CCCC	CCCC	CCCC	CCCC	CCCC	CCCC	CCCC	CCCC	CCCC	CCCC	CCCC	CCCC	CCCC	CCCC	CCCC	CCCC	CCCC	CCCC	CCCC	CCCC	CCCC	CCCC	CCCC	CCCC	CCCC	CCCC	CCCC	CCCC	CCCC	CCCC	CCCC
PotVar0001980	T	C	----	----	----	----	----	----	----	----	----	----	----	----	----	----	----	----	----	----	----	----	----	----	----	----	----	----	----	----	----	----	----	----	----	----	----	----	----	----	----	----	----	----	----	----	----	----	----
PotVar0001981	T	C	CCCC	CCCC	CCCC	CCCC	CCCC	CCCC	CCCC	CCCC	CCCC	CCCC	CCCC	CCCC	CCCC	CCCC	CCCC	CCCC	CCCC	CCCC	CCCC	CCCC	CCCC	CCCC	CCCC	CCCC	CCCC	CCCC	CCCC	CCCC	CCCC	CCCC	CCCC	CCCC	CCCC	CCCC	CCCC	CCCC	CCCC	CCCC	CCCC	CCCC	CCCC	CCCC	CCCC	CCCC	CCCC	CCCC	CCCC
PotVar0001982	A	C	AAAA	AAAA	AAAA	AAAC	AAAC	AAAA	AAAA	AAAA	AAAA	AAAA	AAAA	AAAA	AAAA	AAAA	AAAC	AAAA	AAAC	AAAC	AAAA	AAAA	AAAA	AAAA	AAAA	AAAA	AAAA	AAAA	AAAA	AAAA	AAAA	AAAA	AAAA	AAAA	AAAA	AACC	AAAA	AAAA	AAAA	AAAA	AAAA	AAAA	AAAA	AAAA	AAAA	AAAA	AAAA	AAAA	AAAA
PotVar0002006	A	G	----	----	----	----	----	----	----	----	----	----	----	----	----	----	----	----	----	----	----	----	----	----	----	----	----	----	----	----	----	----	----	----	----	----	----	----	----	----	----	----	----	----	----	----	----	----	----
PotVar0002015	A	G	----	----	----	----	----	----	----	----	----	----	----	----	----	----	----	----	----	----	----	----	----	----	----	----	----	----	----	----	----	----	----	----	----	----	----	----	----	----	----	----	----	----	----	----	----	----	----
PotVar0002019	T	G	----	----	----	----	----	----	----	----	----	----	----	----	----	----	----	----	----	----	----	----	----	----	----	----	----	----	----	----	----	----	----	----	----	----	----	----	----	----	----	----	----	----	----	----	----	----	----
PotVar0002020	T	C	TTCC	TTCC	TTTC	TCCC	TCCC	TTTT	TTCC	CCCC	TTTC	TCCC	TTCC	CCCC	TTTC	TTTC	TTTC	TTCC	TTCC	TTTC	TTTC	TTCC	TTTC	TCCC	TCCC	TTTC	TCCC	TCCC	TTTC	----	TTCC	TTCC	TCCC	TTCC	TCCC	TCCC	CCCC	TTCC	TCCC	TTTC	TTCC	TCCC	TTCC	TTCC	TTTC	TTCC	TCCC	TTCC	TCCC
PotVar0002032	A	G	GGGG	GGGG	GGGG	GGGG	GGGG	GGGG	GGGG	GGGG	GGGG	GGGG	GGGG	GGGG	GGGG	GGGG	GGGG	GGGG	GGGG	GGGG	GGGG	GGGG	GGGG	GGGG	GGGG	GGGG	GGGG	GGGG	GGGG	GGGG	GGGG	GGGG	GGGG	GGGG	GGGG	GGGG	GGGG	GGGG	GGGG	GGGG	GGGG	GGGG	GGGG	GGGG	GGGG	GGGG	GGGG	GGGG	GGGG
PotVar0002036	T	G	----	----	----	----	----	----	----	----	----	----	----	----	----	----	----	----	----	----	----	----	----	----	----	----	----	----	----	----	----	----	----	----	----	----	----	----	----	----	----	----	----	----	----	----	----	----	----
PotVar0002037	T	C	TTTT	TTTT	TTTT	TTTT	TTTT	TTTT	TTTT	TTTT	TTTT	TTTT	TTTT	TTTT	TTTT	TTTT	TTTT	TTTT	TTTT	TTTT	TTTT	TTTT	TTTT	TTTT	TTTT	TTTT	TTTT	TTTT	TTTT	TTTT	TTTT	TTTT	TTTT	TTTT	TTTT	TTTT	TTTT	TTTT	TTTT	TTTT	TTTT	TTTT	TTTT	TTTT	TTTT	TTTT	TTTT	TTTT	TTTT
PotVar0002038	T	C	CCCC	CCCC	CCCC	CCCC	TCCC	CCCC	CCCC	CCCC	CCCC	CCCC	CCCC	CCCC	CCCC	CCCC	CCCC	CCCC	TCCC	TCCC	CCCC	CCCC	CCCC	CCCC	CCCC	CCCC	CCCC	CCCC	CCCC	CCCC	CCCC	CCCC	CCCC	CCCC	CCCC	CCCC	CCCC	CCCC	CCCC	CCCC	CCCC	CCCC	CCCC	CCCC	CCCC	CCCC	CCCC	CCCC	CCCC
PotVar0002060	T	C	----	----	----	----	----	----	----	----	----	----	----	----	----	----	----	----	----	----	----	----	----	----	----	----	----	----	----	----	----	----	----	----	----	----	----	----	----	----	----	----	----	----	----	----	----	----	----
PotVar0002071	T	G	----	----	----	----	----	----	----	----	----	----	----	----	----	----	----	----	----	----	----	----	----	----	----	----	----	----	----	----	----	----	----	----	----	----	----	----	----	----	----	----	----	----	----	----	----	----	----
PotVar0002072	A	G	----	----	----	----	----	----	----	----	----	----	----	----	----	----	----	----	----	----	----	----	----	----	----	----	----	----	----	----	----	----	----	----	----	----	----	----	----	----	----	----	----	----	----	----	----	----	----
PotVar0002084	A	G	----	----	----	----	----	----	----	----	----	----	----	----	----	----	----	----	----	----	----	----	----	----	----	----	----	----	----	----	----	----	----	----	----	----	----	----	----	----	----	----	----	----	----	----	----	----	----
PotVar0002089	A	G	----	----	----	----	----	----	----	----	----	----	----	----	----	----	----	----	----	----	----	----	----	----	----	----	----	----	----	----	----	----	----	----	----	----	----	----	----	----	----	----	----	----	----	----	----	----	----
PotVar0002097	A	C	CCCC	CCCC	CCCC	ACCC	ACCC	CCCC	ACCC	CCCC	ACCC	CCCC	CCCC	ACCC	CCCC	CCCC	CCCC	CCCC	CCCC	CCCC	CCCC	CCCC	CCCC	ACCC	ACCC	CCCC	CCCC	CCCC	CCCC	CCCC	ACCC	CCCC	CCCC	CCCC	ACCC	CCCC	CCCC	CCCC	CCCC	CCCC	CCCC	ACCC	CCCC	CCCC	CCCC	CCCC	CCCC	CCCC	AACC
PotVar0002099	T	C	TTTT	TTTT	TTCC	TTTC	TTTT	TTCC	TTTT	TTTT	TTCC	TTTT	TTTC	TTTT	TTTC	TTCC	TTTC	TTTC	TTTT	TTTC	TTTC	TTTT	TTCC	TTTT	TTTT	TTTC	TTTT	TTTT	TTTC	TTTC	TTTC	TTTC	TTTT	TTTT	TTTT	TTTT	TTTT	TTCC	TTTC	TTTC	TTTT	TTTT	TTTC	TTCC	TTTC	TTTC	TTTT	TTTT	TTTT
PotVar0002101	T	G	TTTG	TTTT	TTTT	TTTT	TTTT	TTGG	TTTG	TTTT	TTTT	TTTG	TTTG	TTTT	TTGG	TTTG	TTTT	TTTT	TTTT	TTTG	TTTG	TTTT	TTTT	----	TTTG	TTTT	TTTT	TTTT	TTTT	TTTT	TTTT	TTTG	TTTT	TTTT	TTTG	TTTT	TTTT	TTTT	TTTT	TTTG	TTTG	TTTT	TTTG	TTTT	TTTT	TTTT	TTTG	TTTT	TTTT
PotVar0002103	A	G	----	----	----	----	----	----	----	----	----	----	----	----	----	----	----	----	----	----	----	----	----	----	----	----	----	----	----	----	----	----	----	----	----	----	----	----	----	----	----	----	----	----	----	----	----	----	----
PotVar0002110	A	G	----	----	----	----	----	----	----	----	----	----	----	----	----	----	----	----	----	----	----	----	----	----	----	----	----	----	----	----	----	----	----	----	----	----	----	----	----	----	----	----	----	----	----	----	----	----	----
PotVar0002113	A	G	----	----	----	----	----	----	----	----	----	----	----	----	----	----	----	----	----	----	----	----	----	----	----	----	----	----	----	----	----	----	----	----	----	----	----	----	----	----	----	----	----	----	----	----	----	----	----
PotVar0002114	T	G	----	----	----	----	----	----	----	----	----	----	----	----	----	----	----	----	----	----	----	----	----	----	----	----	----	----	----	----	----	----	----	----	----	----	----	----	----	----	----	----	----	----	----	----	----	----	----
PotVar0002130	A	G	AAAA	AAAA	AAAA	AAAA	AAAG	AAAA	AAAA	AAAA	AAAA	AAAA	AAAA	AAAA	AAAA	AAAA	AAAA	AAAA	----	AAAA	AAAA	AAAA	AAAA	AAAA	AAAA	AAAA	AAAA	AAAA	AAAA	AAAA	AAAA	AAAA	AAAA	AAAA	AAAA	AAAA	AAAA	AAAA	AAAA	AAAA	AAAA	AAAA	AAAA	AAAA	AAAA	AAAA	AAAA	AAAA	AAAA
PotVar0002132	T	C	TTTC	TTTT	TTCC	TTTC	TTTT	CCCC	TTTC	TTTT	TTCC	TTTC	TTCC	TTTT	TCCC	TCCC	TTTC	TTTC	TTTT	TTCC	TTCC	TTTT	TTCC	----	TTTC	TTTC	TTTT	TTTT	TTTC	TTTC	TTTC	TTCC	TTTT	TTTT	TTTC	TTTT	TTTT	TTCC	TTTC	TTCC	TTTC	TTTT	TTCC	TTCC	TTTC	TTTC	TTTC	TTTT	TTTT
PotVar0002138	T	C	----	----	----	----	----	----	----	----	----	----	----	----	----	----	----	----	----	----	----	----	----	----	----	----	----	----	----	----	----	----	----	----	----	----	----	----	----	----	----	----	----	----	----	----	----	----	----
PotVar0002139	T	G	TTGG	TTTT	TGGG	TTGG	TTGG	GGGG	TGGG	TTTT	TGGG	TTTG	TTGG	TTTG	TGGG	TGGG	TTGG	TTGG	TTTG	TGGG	TGGG	TTGG	TGGG	TTTG	TTGG	TGGG	TTGG	TTGG	TTGG	TGGG	TGGG	TTGG	TTTG	TTTG	TTGG	TTGG	TTTT	TTGG	TTTG	TGGG	TTTG	TTGG	TTGG	TTGG	TGGG	TTGG	TTTG	TTTT	TGGG
PotVar0002183	A	G	----	----	----	----	----	----	----	----	----	----	----	----	----	----	----	----	----	----	----	----	----	----	----	----	----	----	----	----	----	----	----	----	----	----	----	----	----	----	----	----	----	----	----	----	----	----	----
PotVar0002186	A	G	AAAA	AAAA	AAAA	AAAA	AAAA	AAAA	AAAA	AAAA	AAAA	AAAA	AAAA	AAAA	AAAA	AAAA	AAAA	AAAA	AAAA	AAAA	AAAA	AAAA	AAAA	AAAA	AAAA	AAAA	AAAA	AAAA	AAAA	AAAA	AAAA	AAAA	AAAA	AAAA	AAAA	AAAA	AAAA	AAAA	AAAA	AAAA	AAAA	AAAA	AAAA	AAAA	AAAA	AAAA	AAAA	AAAA	AAAA
PotVar0002188	T	C	TTCC	TTTT	TTTT	TTTT	TTTT	TTCC	TTCC	TTTT	TTTT	TTTC	TTTC	TTTT	TTCC	TTTC	TTTT	TTTC	TTTT	TTTT	TTTC	TTTT	TTTT	TTTC	TTTC	TTCC	TTTT	TTTT	TTTC	TTTC	TTTT	TTTC	TTTT	TTTC	TTTC	TTTT	TTTT	TTTT	TTTT	TTTC	TTTC	TTTT	TTTC	TTTT	TTTT	TTTT	TTTC	TTTT	TTTT
PotVar0002190	A	G	GGGG	GGGG	GGGG	GGGG	GGGG	GGGG	GGGG	GGGG	GGGG	GGGG	GGGG	GGGG	GGGG	GGGG	GGGG	GGGG	GGGG	GGGG	GGGG	GGGG	GGGG	GGGG	GGGG	GGGG	GGGG	GGGG	GGGG	GGGG	GGGG	GGGG	GGGG	GGGG	GGGG	GGGG	GGGG	GGGG	GGGG	GGGG	GGGG	GGGG	GGGG	GGGG	GGGG	GGGG	GGGG	GGGG	GGGG
PotVar0002196	T	C	TTCC	TTTT	TTCC	TTTC	TTTC	CCCC	TTCC	TTTT	TTCC	TTTC	TTCC	TTTT	TCCC	TCCC	TTTC	TTCC	TTTC	TTCC	TTCC	TTCC	TTCC	TTCC	TTCC	TCCC	TTTT	TTTT	TTCC	TTCC	TTTC	TTCC	TTTT	TTTC	TTCC	TTCC	TTTT	TTCC	----	TCCC	TTCC	TTTT	TTCC	TTCC	TTCC	TTTC	TTTC	TTTT	TTTT
PotVar0002202	A	G	AAAA	AAAA	AAAA	AAAG	AAAA	AAAA	AAAA	AAAA	AAAA	AAAA	AAAA	AAAA	AAAA	AAAA	AAAA	AAAA	AAAA	AAAA	AAAA	AAAA	AAAA	AAAA	AAAA	AAAA	AAAA	AAAA	AAAA	AAAA	AAAA	AAAA	AAAA	AAAA	AAAA	AAAA	AAAA	AAAA	AAAA	AAAG	AAAA	AAAA	AAAA	AAAA	AAAA	AAAA	AAAA	AAAA	AAAA
PotVar0002207	A	G	GGGG	GGGG	GGGG	AGGG	GGGG	GGGG	GGGG	GGGG	GGGG	GGGG	GGGG	GGGG	GGGG	GGGG	GGGG	GGGG	GGGG	GGGG	GGGG	GGGG	GGGG	GGGG	GGGG	GGGG	GGGG	GGGG	GGGG	GGGG	GGGG	GGGG	GGGG	GGGG	GGGG	GGGG	GGGG	GGGG	GGGG	AGGG	GGGG	GGGG	GGGG	GGGG	GGGG	GGGG	GGGG	GGGG	GGGG
PotVar0002217	A	G	----	----	----	----	----	----	----	----	----	----	----	----	----	----	----	----	----	----	----	----	----	----	----	----	----	----	----	----	----	----	----	----	----	----	----	----	----	----	----	----	----	----	----	----	----	----	----
PotVar0002219	T	C	----	----	----	----	----	----	----	----	----	----	----	----	----	----	----	----	----	----	----	----	----	----	----	----	----	----	----	----	----	----	----	----	----	----	----	----	----	----	----	----	----	----	----	----	----	----	----
PotVar0002228	A	G	GGGG	GGGG	AAGG	AGGG	AGGG	AAGG	GGGG	GGGG	AAGG	GGGG	AGGG	GGGG	AGGG	AAGG	AGGG	AGGG	AGGG	AAGG	AGGG	AAGG	AAGG	AGGG	AGGG	AGGG	GGGG	GGGG	AGGG	AGGG	AGGG	AGGG	GGGG	GGGG	AGGG	AAGG	GGGG	AAGG	AGGG	AAGG	GGGG	GGGG	AGGG	AAGG	AAGG	AGGG	GGGG	GGGG	GGGG
PotVar0002233	T	C	TTTT	TTTT	TTTT	TTTC	TTTT	TTTT	TTTT	TTTT	TTTT	TTTT	TTTT	TTTT	TTTT	TTTT	TTTT	TTTT	TTTT	TTTT	TTTT	TTTT	TTTT	TTTT	TTTT	TTTT	TTTT	TTTT	TTTT	TTTT	TTTT	TTTT	TTTT	TTTT	TTTT	TTTT	TTTT	TTTT	TTTT	TTTC	TTTT	TTTT	TTTT	TTTT	TTTT	TTTT	TTTT	TTTT	TTTT
PotVar0002270	T	G	----	----	----	----	----	----	----	----	----	----	----	----	----	----	----	----	----	----	----	----	----	----	----	----	----	----	----	----	----	----	----	----	----	----	----	----	----	----	----	----	----	----	----	----	----	----	----
PotVar0002286	A	G	GGGG	GGGG	GGGG	GGGG	GGGG	GGGG	GGGG	AGGG	GGGG	GGGG	GGGG	GGGG	GGGG	GGGG	GGGG	GGGG	GGGG	GGGG	GGGG	GGGG	GGGG	GGGG	GGGG	GGGG	AGGG	AGGG	GGGG	GGGG	GGGG	GGGG	GGGG	GGGG	GGGG	GGGG	GGGG	GGGG	GGGG	GGGG	GGGG	AGGG	GGGG	GGGG	GGGG	AGGG	GGGG	GGGG	GGGG
PotVar0002320	A	G	GGGG	GGGG	GGGG	GGGG	GGGG	GGGG	GGGG	GGGG	GGGG	GGGG	GGGG	GGGG	GGGG	GGGG	GGGG	GGGG	GGGG	GGGG	GGGG	GGGG	GGGG	GGGG	GGGG	GGGG	GGGG	GGGG	GGGG	GGGG	GGGG	GGGG	GGGG	GGGG	GGGG	GGGG	GGGG	GGGG	GGGG	GGGG	GGGG	GGGG	GGGG	GGGG	GGGG	GGGG	GGGG	GGGG	GGGG
PotVar0002321	T	C	CCCC	CCCC	TTCC	CCCC	CCCC	TTCC	CCCC	CCCC	TTCC	CCCC	TCCC	CCCC	TCCC	TTCC	TCCC	TCCC	CCCC	TCCC	TCCC	TTCC	TTCC	TCCC	TCCC	TCCC	CCCC	CCCC	TCCC	TCCC	TCCC	TCCC	CCCC	CCCC	TCCC	CCCC	CCCC	TTCC	TCCC	TCCC	CCCC	CCCC	TCCC	TTCC	TTCC	TCCC	CCCC	CCCC	CCCC
PotVar0002322	T	C	CCCC	CCCC	CCCC	CCCC	CCCC	CCCC	CCCC	CCCC	CCCC	CCCC	CCCC	CCCC	CCCC	CCCC	CCCC	CCCC	CCCC	CCCC	CCCC	CCCC	CCCC	CCCC	CCCC	CCCC	CCCC	CCCC	CCCC	CCCC	CCCC	CCCC	CCCC	CCCC	CCCC	CCCC	CCCC	CCCC	CCCC	CCCC	CCCC	CCCC	CCCC	CCCC	CCCC	CCCC	CCCC	CCCC	CCCC
PotVar0002329	T	C	TTTT	TTTT	TTTT	TTTT	TTTT	TTTT	TTTT	TTTT	TTTT	TTTT	TTTT	TTTT	TTTT	TTTT	TTTT	TTTT	TTTT	TTTT	TTTT	TTTT	TTTT	TTTT	TTTT	TTTT	TTTT	TTTT	TTTT	TTTT	TTTT	TTTT	TTTT	TTTT	TTTT	TTTT	TTTT	TTTT	TTTT	TTTT	TTTC	TTTT	TTTT	TTTT	TTTT	TTTT	TTTT	TTTT	TTTT
PotVar0002372	T	G	----	----	----	----	----	----	----	----	----	----	----	----	----	----	----	----	----	----	----	----	----	----	----	----	----	----	----	----	----	----	----	----	----	----	----	----	----	----	----	----	----	----	----	----	----	----	----
PotVar0002415	A	G	GGGG	GGGG	GGGG	GGGG	GGGG	GGGG	GGGG	GGGG	GGGG	GGGG	GGGG	GGGG	GGGG	GGGG	GGGG	GGGG	GGGG	GGGG	GGGG	GGGG	GGGG	GGGG	GGGG	GGGG	GGGG	GGGG	GGGG	GGGG	GGGG	GGGG	GGGG	GGGG	GGGG	GGGG	GGGG	GGGG	GGGG	GGGG	GGGG	GGGG	GGGG	GGGG	GGGG	GGGG	GGGG	GGGG	GGGG
PotVar0002416	T	C	TTTT	TTTT	TTCC	TTTT	TTTT	TTCC	TTTT	TTTT	TTCC	TTTT	TTTC	TTTT	TTTC	TTCC	TTTC	TTTC	TTTT	TTTC	TTTC	TTCC	TTCC	TTTC	TTTC	TTTC	TTTT	TTTT	TTTC	TTTC	TTTC	TTTC	TTTT	TTTT	TTTC	TTTT	TTTT	TTCC	TTTC	TTTC	TTTT	TTTT	TTTC	TTCC	TTCC	TTTC	TTTT	TTTT	TTTT
PotVar0002422	A	G	AAAA	AAAA	AAAA	AAAA	AAAA	AAAA	AAAA	AAAA	AAAA	AAAA	AAAA	AAAA	AAAA	AAAA	AAAA	AAAA	AAAA	AAAA	AAAA	AAAA	AAAA	AAAA	AAAA	AAAA	AAAA	AAAA	AAAA	AAAA	AAAA	AAAA	AAAA	AAAA	AAAA	AAAA	AAAA	AAAA	AAAA	AAAA	AAAG	AAAA	AAAA	AAAA	AAAA	AAAA	AAAA	AAAA	AAAA
PotVar0002433	A	G	AAGG	AAAA	AAGG	AAAG	AAAG	GGGG	AAGG	AAAA	AAGG	AAAG	AAGG	AAAA	AGGG	AGGG	AAAG	AAGG	AAAG	AAGG	AAGG	AAGG	AAGG	AAGG	AAGG	AGGG	AAAA	AAAA	AAGG	AAGG	AAAG	AAGG	AAAA	AAAG	AAGG	AAGG	AAAA	AAGG	AAAG	AGGG	AAAG	AAGG	AAGG	AAGG	AAGG	AAAG	AAAG	AAAA	AAAA
PotVar0002438	A	G	AAGG	GGGG	GGGG	GGGG	GGGG	AAGG	AAGG	GGGG	GGGG	AGGG	AGGG	GGGG	AAGG	AGGG	GGGG	AGGG	GGGG	GGGG	AGGG	GGGG	GGGG	AGGG	AGGG	AAGG	GGGG	GGGG	AGGG	AGGG	GGGG	AGGG	GGGG	AGGG	AGGG	GGGG	GGGG	GGGG	GGGG	AGGG	AGGG	AGGG	AGGG	GGGG	GGGG	GGGG	AGGG	GGGG	GGGG
PotVar0002440	T	C	CCCC	CCCC	TCCC	CCCC	CCCC	CCCC	TCCC	TCCC	CCCC	CCCC	CCCC	CCCC	CCCC	CCCC	CCCC	CCCC	TCCC	CCCC	TCCC	CCCC	TCCC	CCCC	CCCC	CCCC	TCCC	TCCC	CCCC	TCCC	TCCC	CCCC	TCCC	CCCC	CCCC	CCCC	TTCC	CCCC	CCCC	CCCC	CCCC	CCCC	CCCC	CCCC	TCCC	TCCC	CCCC	CCCC	TCCC
PotVar0002441	T	C	CCCC	CCCC	CCCC	CCCC	TCCC	CCCC	CCCC	CCCC	CCCC	CCCC	CCCC	CCCC	CCCC	CCCC	CCCC	CCCC	TCCC	TCCC	CCCC	CCCC	CCCC	CCCC	CCCC	CCCC	CCCC	CCCC	CCCC	CCCC	CCCC	CCCC	CCCC	CCCC	CCCC	CCCC	CCCC	CCCC	CCCC	CCCC	CCCC	CCCC	CCCC	CCCC	CCCC	CCCC	CCCC	CCCC	CCCC
PotVar0002450	A	G	----	----	----	----	----	----	----	----	----	----	----	----	----	----	----	----	----	----	----	----	----	----	----	----	----	----	----	----	----	----	----	----	----	----	----	----	----	----	----	----	----	----	----	----	----	----	----
PotVar0002455	T	C	TTTT	TTTT	TTTT	TTTT	TTTT	TTTT	TTTT	TTTT	TTTT	TTTT	TTTT	TTTC	TTTT	TTTT	TTTT	TTTT	TTTC	TTTT	TTTT	TTTT	TTTT	TTTC	TTTT	TTTT	TTTC	TTTC	TTTT	TTTT	TTTC	TTTT	TTTT	TTTT	TTTT	TTTT	TTTC	TTTT	TTTC	TTTT	TTTT	TTTT	TTTT	TTTT	TTTT	TTTC	TTTT	TTTT	TTTT
PotVar0002461	A	G	AAGG	GGGG	GGGG	AGGG	AGGG	AAGG	AAGG	GGGG	AGGG	AGGG	AGGG	AGGG	GGGG	AGGG	GGGG	AGGG	AAGG	AAGG	AGGG	GGGG	GGGG	AAGG	AGGG	AAGG	AGGG	AGGG	AGGG	AAGG	AGGG	AGGG	GGGG	AGGG	AGGG	GGGG	AGGG	GGGG	AGGG	AGGG	AAGG	GGGG	GGGG	GGGG	GGGG	AGGG	AGGG	GGGG	GGGG
PotVar0002464	T	C	----	----	----	----	----	----	----	----	----	----	----	----	----	----	----	----	----	----	----	----	----	----	----	----	----	----	----	----	----	----	----	----	----	----	----	----	----	----	----	----	----	----	----	----	----	----	----
PotVar0002481	T	C	TTCC	CCCC	CCCC	CCCC	CCCC	TTCC	TTCC	CCCC	TCCC	TCCC	TCCC	CCCC	CCCC	TCCC	CCCC	TCCC	CCCC	TCCC	TCCC	CCCC	CCCC	TCCC	TCCC	TTCC	CCCC	CCCC	TCCC	----	CCCC	TCCC	CCCC	TCCC	TCCC	CCCC	CCCC	CCCC	CCCC	TCCC	TTCC	TCCC	CCCC	CCCC	CCCC	CCCC	TCCC	CCCC	CCCC
PotVar0002500	A	G	GGGG	GGGG	AAGG	GGGG	GGGG	AAGG	GGGG	GGGG	AAGG	GGGG	AGGG	GGGG	AGGG	AAGG	AGGG	AGGG	GGGG	GGGG	AGGG	AGGG	AAGG	AGGG	AGGG	AGGG	GGGG	GGGG	AGGG	AGGG	AGGG	AGGG	GGGG	GGGG	AGGG	GGGG	GGGG	AAGG	AGGG	AGGG	GGGG	GGGG	AGGG	AAGG	AAGG	AGGG	GGGG	GGGG	GGGG
PotVar0002504	T	C	TTCC	CCCC	TTCC	CCCC	CCCC	TTTT	TCCC	TCCC	TTTC	TCCC	TTCC	CCCC	TCCC	TTTC	TCCC	TTCC	CCCC	CCCC	TCCC	TCCC	TTCC	TTCC	TTCC	TTTC	CCCC	CCCC	TTCC	TTTC	TCCC	TTCC	CCCC	TCCC	TTCC	TTCC	CCCC	TTCC	TCCC	TCCC	TCCC	----	TCCC	TTCC	TTCC	TCCC	CCCC	CCCC	CCCC
PotVar0002505	T	G	----	----	----	----	----	----	----	----	----	----	----	----	----	----	----	----	----	----	----	----	----	----	----	----	----	----	----	----	----	----	----	----	----	----	----	----	----	----	----	----	----	----	----	----	----	----	----
PotVar0002507	A	G	AAAA	AAAA	AAAG	AAGG	AAAG	AAAA	AAAG	AAAG	AAAG	AAAA	AAAG	AGGG	AAAA	AAAA	AAAA	AAAA	AGGG	AAAA	AAAA	AAGG	AAAA	AAAG	AAAA	AAAA	AAAG	AAAG	AAAA	AAAA	AGGG	AAAG	AAAA	AAAA	AAAA	AAGG	AAGG	AAAA	AAGG	AAAG	AAAG	AGGG	AAAA	AAAA	AAAG	AAGG	AAAA	AAAA	AAGG
PotVar0002525	A	G	GGGG	GGGG	GGGG	GGGG	GGGG	GGGG	GGGG	GGGG	GGGG	GGGG	GGGG	GGGG	GGGG	GGGG	GGGG	GGGG	GGGG	GGGG	GGGG	GGGG	GGGG	GGGG	GGGG	GGGG	GGGG	GGGG	GGGG	GGGG	GGGG	GGGG	GGGG	GGGG	GGGG	AGGG	GGGG	GGGG	GGGG	GGGG	GGGG	GGGG	GGGG	GGGG	GGGG	GGGG	GGGG	GGGG	GGGG
PotVar0002530	T	C	CCCC	CCCC	TCCC	CCCC	CCCC	CCCC	TCCC	CCCC	CCCC	CCCC	CCCC	CCCC	CCCC	CCCC	CCCC	CCCC	CCCC	CCCC	TCCC	CCCC	TCCC	CCCC	CCCC	CCCC	CCCC	CCCC	CCCC	CCCC	CCCC	CCCC	TCCC	CCCC	CCCC	CCCC	TTCC	CCCC	CCCC	CCCC	CCCC	TCCC	CCCC	CCCC	TCCC	CCCC	CCCC	CCCC	TCCC
PotVar0002531	T	C	CCCC	CCCC	CCCC	CCCC	CCCC	CCCC	TCCC	CCCC	CCCC	CCCC	CCCC	CCCC	CCCC	CCCC	CCCC	CCCC	CCCC	TCCC	TCCC	CCCC	CCCC	CCCC	CCCC	CCCC	CCCC	CCCC	CCCC	CCCC	CCCC	CCCC	CCCC	CCCC	CCCC	CCCC	CCCC	CCCC	CCCC	TCCC	TCCC	TCCC	CCCC	CCCC	CCCC	CCCC	TCCC	CCCC	CCCC
PotVar0002532	T	G	TTTT	TTTT	TTTT	TTTT	TTTT	TTTT	TTTT	TTTT	TTTT	TTTT	TTTT	TTTT	TTTT	TTTT	TTTT	TTTT	TTTT	TTTT	TTTT	TTTT	TTTT	TTTT	TTTT	TTTT	TTTT	TTTT	TTTT	TTTT	TTTT	TTTT	TTTT	TTTT	TTTT	TTTT	TTTT	TTTT	TTTT	TTTT	TTTT	TTTT	TTTT	TTTT	TTTT	TTTT	TTTT	TTTT	TTTT
PotVar0002533	T	C	TTCC	TTTT	CCCC	TCCC	TTCC	CCCC	CCCC	TTCC	CCCC	TTTC	TCCC	TCCC	TTTC	TCCC	TTCC	TTCC	CCCC	TTCC	TCCC	TCCC	TCCC	----	TTCC	TCCC	TCCC	TCCC	TTCC	TCCC	CCCC	TCCC	TTTC	TTTC	TTCC	CCCC	CCCC	TTCC	TCCC	TCCC	TCCC	CCCC	TTTC	TTCC	CCCC	TCCC	TTTC	TTTT	TCCC
PotVar0002544	T	G	TTTT	TTTT	TTTT	TTTT	TTTG	TTTT	TTTT	TTTT	TTTT	TTTT	TTTT	TTTT	TTTT	TTTT	TTTG	TTTT	TTTG	TTTG	TTTT	TTTT	TTTT	TTTT	TTTT	TTTT	TTGG	TTGG	TTTT	TTTT	TTTT	TTTT	TTTT	TTTT	TTTT	TTTT	TTTT	TTTT	TTTT	TTTT	TTTT	TTTT	TTTT	TTTT	TTTT	TTTT	TTTT	TTTT	TTTT
PotVar0002556	T	C	TTCC	CCCC	CCCC	CCCC	CCCC	TTCC	TCCC	TCCC	TCCC	TCCC	TCCC	CCCC	CCCC	TCCC	CCCC	TCCC	CCCC	CCCC	CCCC	CCCC	CCCC	TCCC	TCCC	----	CCCC	CCCC	TCCC	TCCC	CCCC	TCCC	CCCC	TCCC	TCCC	CCCC	CCCC	CCCC	CCCC	CCCC	TCCC	CCCC	CCCC	CCCC	CCCC	CCCC	CCCC	CCCC	CCCC
PotVar0002562	A	G	GGGG	GGGG	GGGG	GGGG	GGGG	GGGG	GGGG	GGGG	GGGG	GGGG	GGGG	GGGG	GGGG	GGGG	AGGG	GGGG	GGGG	GGGG	GGGG	GGGG	GGGG	GGGG	GGGG	GGGG	AAGG	AAGG	GGGG	GGGG	GGGG	GGGG	GGGG	GGGG	GGGG	GGGG	GGGG	GGGG	GGGG	GGGG	GGGG	GGGG	GGGG	GGGG	GGGG	GGGG	GGGG	GGGG	GGGG
PotVar0002568	A	G	----	----	----	----	----	----	----	----	----	----	----	----	----	----	----	----	----	----	----	----	----	----	----	----	----	----	----	----	----	----	----	----	----	----	----	----	----	----	----	----	----	----	----	----	----	----	----
PotVar0002594	A	G	AAGG	GGGG	GGGG	GGGG	GGGG	AAGG	AGGG	AGGG	AGGG	AGGG	AGGG	GGGG	GGGG	AGGG	GGGG	AGGG	GGGG	GGGG	GGGG	GGGG	GGGG	AGGG	AGGG	AAGG	GGGG	GGGG	AGGG	AGGG	GGGG	AGGG	GGGG	AGGG	AGGG	GGGG	GGGG	GGGG	GGGG	GGGG	AGGG	GGGG	GGGG	GGGG	GGGG	GGGG	GGGG	GGGG	GGGG
PotVar0002595	A	G	GGGG	GGGG	GGGG	GGGG	GGGG	GGGG	GGGG	GGGG	GGGG	GGGG	GGGG	GGGG	GGGG	GGGG	GGGG	GGGG	GGGG	GGGG	GGGG	GGGG	GGGG	GGGG	GGGG	GGGG	GGGG	GGGG	GGGG	GGGG	GGGG	GGGG	GGGG	GGGG	GGGG	GGGG	GGGG	GGGG	GGGG	GGGG	GGGG	GGGG	GGGG	GGGG	GGGG	GGGG	GGGG	GGGG	GGGG
PotVar0002607	A	G	GGGG	GGGG	AGGG	GGGG	GGGG	GGGG	AGGG	GGGG	GGGG	GGGG	GGGG	GGGG	GGGG	GGGG	GGGG	GGGG	GGGG	GGGG	AGGG	GGGG	AGGG	GGGG	GGGG	GGGG	GGGG	GGGG	GGGG	GGGG	GGGG	GGGG	AGGG	GGGG	GGGG	GGGG	AAGG	GGGG	GGGG	GGGG	GGGG	AGGG	GGGG	GGGG	AGGG	GGGG	GGGG	GGGG	AGGG
PotVar0002620	A	G	GGGG	GGGG	GGGG	GGGG	GGGG	GGGG	GGGG	GGGG	GGGG	GGGG	GGGG	GGGG	GGGG	GGGG	AGGG	GGGG	GGGG	GGGG	GGGG	GGGG	GGGG	GGGG	GGGG	GGGG	AAGG	AAGG	GGGG	GGGG	GGGG	GGGG	GGGG	GGGG	GGGG	GGGG	GGGG	GGGG	GGGG	GGGG	GGGG	GGGG	GGGG	GGGG	GGGG	GGGG	GGGG	GGGG	GGGG
PotVar0002627	A	G	GGGG	GGGG	AGGG	AAGG	AGGG	GGGG	AGGG	AGGG	AGGG	GGGG	AGGG	AAAG	GGGG	GGGG	GGGG	GGGG	AAAG	GGGG	GGGG	AAGG	GGGG	AGGG	GGGG	GGGG	AGGG	AGGG	GGGG	GGGG	AAAG	AGGG	GGGG	GGGG	GGGG	AAGG	AAGG	GGGG	AAGG	AGGG	AGGG	AAGG	GGGG	GGGG	AGGG	AAGG	GGGG	GGGG	AAGG
PotVar0002642	T	G	----	----	----	----	----	----	----	----	----	----	----	----	----	----	----	----	----	----	----	----	----	----	----	----	----	----	----	----	----	----	----	----	----	----	----	----	----	----	----	----	----	----	----	----	----	----	----
PotVar0002654	A	G	----	----	----	----	----	----	----	----	----	----	----	----	----	----	----	----	----	----	----	----	----	----	----	----	----	----	----	----	----	----	----	----	----	----	----	----	----	----	----	----	----	----	----	----	----	----	----
PotVar0002715	A	G	AAGG	AAAA	AAAA	AAAA	AAAA	AAGG	AAAG	AAAG	AAAG	AAAG	AAAG	AAAA	AAAA	AAAG	AAAA	AAAG	AAAA	AAAA	AAAA	AAAA	AAAA	AAAG	AAAG	AAGG	AAAA	AAAA	AAAG	AAAG	AAAA	AAAG	AAAA	AAAG	AAAG	AAAA	AAAA	AAAA	AAAA	AAAA	AAAG	AAAA	AAAA	AAAA	AAAA	AAAA	AAAA	AAAA	AAAA
PotVar0002716	T	C	CCCC	TTTC	TTTC	TTCC	TCCC	TTCC	TTCC	TCCC	TTTC	CCCC	TCCC	----	TCCC	TTCC	TTCC	TCCC	TCCC	CCCC	TTCC	TCCC	TTCC	TTCC	TCCC	TCCC	TCCC	TCCC	TTCC	TTCC	TTTC	TTCC	CCCC	TCCC	TCCC	CCCC	TCCC	TTCC	TTCC	TTTC	CCCC	TTCC	TCCC	TTCC	TTCC	TTCC	TCCC	CCCC	TTCC
PotVar0002717	T	C	TTTT	TTTT	TTTT	TTTT	TTTT	TTTT	TTTT	TTTT	TTTT	TTTT	TTTT	TTTT	TTTT	TTTT	TTTT	TTTT	TTTT	TTTT	TTTT	TTTT	TTTT	TTTT	TTTT	TTTT	TTTT	TTTT	TTTT	TTTT	TTTT	TTTT	TTTT	TTTT	TTTT	TTTT	TTTT	TTTT	TTTT	TTTT	TTTT	TTTT	TTTT	TTTT	TTTT	TTTT	TTTT	TTTT	TTTT
PotVar0002720	T	C	CCCC	CCCC	CCCC	TCCC	CCCC	CCCC	TCCC	CCCC	CCCC	CCCC	CCCC	CCCC	CCCC	CCCC	CCCC	CCCC	CCCC	CCCC	TCCC	CCCC	CCCC	CCCC	CCCC	CCCC	CCCC	CCCC	CCCC	CCCC	CCCC	CCCC	CCCC	CCCC	CCCC	CCCC	CCCC	CCCC	CCCC	TCCC	CCCC	TCCC	CCCC	CCCC	CCCC	CCCC	TCCC	CCCC	CCCC
PotVar0002722	T	C	----	----	----	----	----	----	----	----	----	----	----	----	----	----	----	----	----	----	----	----	----	----	----	----	----	----	----	----	----	----	----	----	----	----	----	----	----	----	----	----	----	----	----	----	----	----	----
PotVar0002736	A	G	GGGG	AAAG	AGGG	AGGG	AGGG	GGGG	AGGG	AGGG	AGGG	GGGG	GGGG	AAGG	GGGG	GGGG	AGGG	GGGG	AGGG	GGGG	GGGG	GGGG	GGGG	AGGG	GGGG	GGGG	AGGG	AGGG	AGGG	AGGG	AAGG	AGGG	GGGG	AGGG	GGGG	GGGG	AGGG	GGGG	AGGG	AGGG	GGGG	AGGG	GGGG	GGGG	GGGG	AGGG	GGGG	GGGG	AAGG
PotVar0002750	T	G	GGGG	GGGG	TTGG	GGGG	TGGG	TTGG	GGGG	GGGG	TTGG	GGGG	TGGG	GGGG	TGGG	TTGG	TGGG	TGGG	TGGG	TGGG	TGGG	TGGG	TTGG	TGGG	TGGG	TGGG	GGGG	GGGG	TGGG	TGGG	TGGG	TGGG	GGGG	GGGG	TGGG	GGGG	GGGG	TTGG	TGGG	TGGG	GGGG	GGGG	TGGG	TTGG	TTGG	TGGG	GGGG	GGGG	GGGG
PotVar0002770	T	C	TTCC	TTTT	TTTT	TTTT	TTTT	TTCC	TTTC	TTTC	TTTC	TTTC	TTTC	TTTT	TTTT	TTTC	TTTT	TTTC	TTTT	TTTT	TTTT	TTTT	TTTT	TTTC	TTTC	TTCC	TTTT	TTTT	TTTC	TTTC	TTTT	TTTC	TTTT	TTTC	TTTC	TTTT	TTTT	TTTT	TTTT	TTTT	TTTC	TTTT	TTTT	TTTT	TTTT	TTTT	TTTT	TTTT	TTTT
PotVar0002772	T	G	----	----	----	----	----	----	----	----	----	----	----	----	----	----	----	----	----	----	----	----	----	----	----	----	----	----	----	----	----	----	----	----	----	----	----	----	----	----	----	----	----	----	----	----	----	----	----
PotVar0002773	A	C	----	----	----	----	----	----	----	----	----	----	----	----	----	----	----	----	----	----	----	----	----	----	----	----	----	----	----	----	----	----	----	----	----	----	----	----	----	----	----	----	----	----	----	----	----	----	----
PotVar0002798	A	G	----	----	----	----	----	----	----	----	----	----	----	----	----	----	----	----	----	----	----	----	----	----	----	----	----	----	----	----	----	----	----	----	----	----	----	----	----	----	----	----	----	----	----	----	----	----	----
PotVar0002800	T	C	TCCC	CCCC	TTTT	TTCC	TTCC	TTCC	TTTC	TCCC	----	TTCC	TCCC	TCCC	TCCC	TTCC	TTCC	TCCC	TCCC	TTCC	TTTC	TCCC	TTTC	TCCC	TCCC	TTCC	TTCC	TTCC	TCCC	TCCC	TTCC	TTCC	TCCC	TCCC	----	TTCC	TTCC	TTTC	TCCC	TTTC	TCCC	TTTC	TTCC	TTTC	TTTC	TCCC	TCCC	CCCC	TTTC
PotVar0002819	T	G	TTTG	TTTT	TTGG	TTTG	TTTT	TTGG	TTTG	TTTT	TTGG	TTTG	TTTG	TTTT	TTTG	TTGG	TTTG	TTTG	TTTT	TTTT	TTGG	TTTG	TTGG	TTTG	TTTG	TTGG	TTTG	TTTG	TTTG	TTTG	TTTG	TTTG	TTTT	TTTG	TTTG	TTTT	TTTT	TGGG	TTTG	TTGG	TTTT	TTTG	TTGG	TGGG	TGGG	TTTG	TTTG	TTTT	TTTT
PotVar0002828	A	G	GGGG	GGGG	GGGG	AGGG	GGGG	GGGG	GGGG	GGGG	GGGG	GGGG	GGGG	GGGG	GGGG	GGGG	GGGG	GGGG	GGGG	GGGG	AGGG	GGGG	GGGG	GGGG	GGGG	GGGG	GGGG	GGGG	GGGG	GGGG	GGGG	GGGG	GGGG	GGGG	GGGG	GGGG	GGGG	GGGG	GGGG	AGGG	GGGG	AGGG	GGGG	GGGG	GGGG	GGGG	AGGG	GGGG	GGGG
PotVar0002861	A	G	AGGG	AGGG	AAAG	AAGG	AGGG	AAGG	AAGG	AGGG	AAAG	AAGG	AGGG	AGGG	AGGG	AAGG	AAGG	AGGG	GGGG	GGGG	AAGG	AGGG	AAGG	AGGG	AGGG	AAGG	AGGG	AGGG	AAGG	AAGG	AAGG	AGGG	GGGG	AAGG	AGGG	GGGG	GGGG	AAAG	AGGG	AAGG	GGGG	AAGG	AAGG	AAAG	AAAG	AGGG	AGGG	GGGG	AAGG
PotVar0002876	T	C	----	----	----	----	----	----	----	----	----	----	----	----	----	----	----	----	----	----	----	----	----	----	----	----	----	----	----	----	----	----	----	----	----	----	----	----	----	----	----	----	----	----	----	----	----	----	----
PotVar0002892	T	C	TTCC	TTTT	TTTT	TTTT	TTTT	TTCC	TTTC	TTTC	TTTC	TTTC	TTTC	TTTT	TTTT	TTTC	TTTT	TTTC	TTTT	TTTT	TTTT	TTTT	TTTT	TTTC	TTTC	TCCC	TTTT	TTTT	TTTC	----	TTTT	TTTC	TTTT	TTTC	TTTC	TTTT	TTTT	TTTT	TTTT	TTTT	TTTC	TTTT	TTTT	TTTT	TTTT	TTTT	TTTT	TTTT	TTTT
PotVar0002908	T	C	TTTC	TCCC	TTTT	TTCC	TTCC	TTTT	TTTT	TTCC	TTTT	TTTC	TTCC	TCCC	TCCC	TTTC	TTTC	TTCC	TCCC	TTCC	TTTC	TCCC	TTTC	TTCC	TTCC	TTTT	TTCC	TTCC	TTTC	----	TTCC	TTCC	TCCC	TTTC	TTCC	TTCC	TTCC	TTTC	TCCC	TTTC	TTCC	TTTC	TTCC	TTTC	TTTC	TCCC	TCCC	CCCC	TTTC
PotVar0002934	A	G	----	----	----	----	----	----	----	----	----	----	----	----	----	----	----	----	----	----	----	----	----	----	----	----	----	----	----	----	----	----	----	----	----	----	----	----	----	----	----	----	----	----	----	----	----	----	----
PotVar0002935	T	C	----	----	----	----	----	----	----	----	----	----	----	----	----	----	----	----	----	----	----	----	----	----	----	----	----	----	----	----	----	----	----	----	----	----	----	----	----	----	----	----	----	----	----	----	----	----	----
PotVar0002940	T	C	CCCC	TCCC	TTTC	TTCC	TTCC	TTCC	TCCC	TTCC	TTTC	TCCC	TTTC	TTCC	TCCC	TTCC	TCCC	TCCC	TTTC	TCCC	TTCC	TTTC	TCCC	TCCC	TCCC	CCCC	TCCC	TCCC	TTTC	TCCC	TTTT	TTTC	TCCC	TTCC	TCCC	TTCC	TCCC	TCCC	TTCC	TCCC	TCCC	TTTC	TCCC	TTCC	TTTC	TTCC	CCCC	TCCC	TTCC
PotVar0002944	A	C	AACC	CCCC	CCCC	CCCC	CCCC	CCCC	AACC	ACCC	ACCC	ACCC	CCCC	ACCC	CCCC	CCCC	AACC	ACCC	ACCC	CCCC	CCCC	CCCC	CCCC	ACCC	CCCC	AACC	ACCC	ACCC	CCCC	ACCC	CCCC	CCCC	CCCC	ACCC	CCCC	CCCC	ACCC	AACC	ACCC	ACCC	CCCC	CCCC	ACCC	ACCC	CCCC	ACCC	CCCC	CCCC	CCCC
PotVar0002954	T	C	----	----	----	----	----	----	----	----	----	----	----	----	----	----	----	----	----	----	----	----	----	----	----	----	----	----	----	----	----	----	----	----	----	----	----	----	----	----	----	----	----	----	----	----	----	----	----
PotVar0002965	T	C	----	----	----	----	----	----	----	----	----	----	----	----	----	----	----	----	----	----	----	----	----	----	----	----	----	----	----	----	----	----	----	----	----	----	----	----	----	----	----	----	----	----	----	----	----	----	----
PotVar0002966	A	G	----	----	----	----	----	----	----	----	----	----	----	----	----	----	----	----	----	----	----	----	----	----	----	----	----	----	----	----	----	----	----	----	----	----	----	----	----	----	----	----	----	----	----	----	----	----	----
PotVar0002994	T	C	TTTT	TTTT	TTTT	TTTT	TTTT	TTTT	TTTT	TTTC	TTTT	TTTT	TTTC	TTTT	TTTT	TTTT	TTTT	TTTT	TTTT	TTTT	TTTC	TTTT	TTTT	TTTT	TTTT	TTTT	TTTC	TTTC	TTTT	TTTT	TTTT	TTTT	TTTT	TTTT	TTTT	TTTT	TTTT	TTTT	TTTT	TTTT	TTTT	TTTT	TTTT	TTTC	TTTT	TTTT	TTTT	TTTT	TTTT
PotVar0003002	T	C	TTTT	TTTT	TTCC	TTTT	TTCC	TTCC	TTTT	TTCC	TCCC	TTTT	TTCC	TTTT	TTTC	TTCC	TTTT	TTTC	TTTC	TTTC	TTCC	TTTC	TTTC	TTTC	TTTC	TTTT	TTTC	TTTC	TTTC	----	TTTC	TTTC	TTTT	TTTC	TTTC	TTTT	TTTT	TTTC	TTTC	TTTC	TTTT	TTTT	TTTC	TTCC	TCCC	TTTC	TTTT	TTTT	TTTT
PotVar0003004	T	C	TTTC	CCCC	TTCC	TCCC	TTCC	TTTT	TTCC	TTTC	TTTT	TTCC	TTCC	TCCC	TCCC	TTTC	TTCC	TTCC	TTCC	TTCC	TTCC	TCCC	TCCC	----	TTCC	TTTC	TTTC	TTTC	TTCC	TTCC	TCCC	TTCC	CCCC	TTCC	TTCC	TTCC	TCCC	TTTC	TTCC	TTTC	TTCC	CCCC	TTCC	TTTC	TTTC	TTCC	TCCC	CCCC	CCCC
PotVar0003033	T	C	TTTT	TTTT	TTCC	TTTT	TTTC	TTCC	TTTT	TTTC	TCCC	TTTT	TTTC	TTTT	TTTC	TTCC	TTTT	TTTC	TTTT	TTTC	TTTC	TTTC	TTTC	TTTC	TTTC	TTTT	TTTT	TTTT	TTTC	TTTC	TTTC	TTTC	TTTT	TTTC	TTTC	TTTT	TTTT	TTTC	TTTC	TTTC	TTTT	TTTT	TTTC	TTTC	TCCC	TTTC	TTTT	TTTT	TTTT
PotVar0003054	A	G	AAAG	AAAA	AAGG	AAAG	AAGG	GGGG	AAAA	AAGG	AGGG	AAAG	AAGG	AAAA	AAAG	AGGG	AAAA	AAAG	AAAG	AAGG	AAGG	AAAG	AAAG	AAAG	AAGG	AAAG	AAGG	AAGG	AAGG	AAAG	AAAG	AAGG	AAAA	AAAG	AAGG	AAGG	AAAA	AAAG	AAAG	AAGG	AAGG	AAAA	AAAG	AAGG	AGGG	AAAG	AAAG	AAAA	AAAA
PotVar0003077	T	C	CCCC	CCCC	TCCC	TCCC	CCCC	CCCC	TCCC	CCCC	CCCC	TCCC	CCCC	----	CCCC	CCCC	CCCC	CCCC	CCCC	CCCC	CCCC	CCCC	CCCC	CCCC	CCCC	CCCC	CCCC	CCCC	CCCC	CCCC	----	CCCC	CCCC	CCCC	CCCC	CCCC	CCCC	CCCC	CCCC	CCCC	CCCC	TCCC	CCCC	CCCC	CCCC	CCCC	CCCC	CCCC	TTCC
PotVar0003078	T	G	TGGG	TTTT	TGGG	TTGG	TTGG	GGGG	TGGG	TGGG	GGGG	TGGG	TTGG	TTTG	TTTG	TGGG	TTTG	TTGG	TTTG	----	TTGG	TTTG	TTTG	TTGG	TTGG	TGGG	TGGG	TGGG	TTGG	TTGG	TGGG	TTGG	TTTT	TTGG	TTGG	TTGG	TTTT	TGGG	TTTG	TTGG	----	TTGG	TTGG	TGGG	TGGG	TTTG	TTTG	TTTT	TTGG
PotVar0003084	A	G	AGGG	GGGG	GGGG	GGGG	GGGG	AAGG	GGGG	GGGG	GGGG	AGGG	GGGG	GGGG	GGGG	GGGG	GGGG	GGGG	GGGG	GGGG	GGGG	GGGG	GGGG	----	AGGG	AGGG	AGGG	AGGG	AGGG	----	GGGG	AGGG	GGGG	GGGG	AGGG	GGGG	GGGG	GGGG	GGGG	GGGG	AGGG	GGGG	GGGG	GGGG	GGGG	GGGG	GGGG	GGGG	GGGG
PotVar0003105	T	G	TGGG	TTTT	TGGG	TTGG	TTGG	GGGG	TGGG	TGGG	GGGG	TGGG	TTGG	TTTG	TTTG	TGGG	TTTG	TTGG	TTTG	TTTG	TTGG	TTTG	TTTG	TTGG	TTGG	TGGG	TGGG	TGGG	TTGG	TTGG	TGGG	TTGG	TTTT	TTGG	TTGG	TTTT	TTTT	TGGG	TTTG	TTGG	TTTG	TTGG	TTGG	TGGG	TGGG	TTTG	TTTG	TTTT	TTGG
PotVar0003111	A	G	GGGG	GGGG	GGGG	GGGG	GGGG	GGGG	GGGG	GGGG	GGGG	GGGG	GGGG	GGGG	GGGG	GGGG	GGGG	GGGG	GGGG	GGGG	GGGG	GGGG	GGGG	GGGG	GGGG	GGGG	GGGG	GGGG	GGGG	GGGG	GGGG	GGGG	GGGG	GGGG	GGGG	GGGG	GGGG	GGGG	GGGG	GGGG	GGGG	GGGG	GGGG	GGGG	GGGG	GGGG	GGGG	GGGG	GGGG
PotVar0003124	A	G	AAAA	AAAA	AAAA	AAAA	AAAA	AAAA	AAAA	AAAA	AAAA	AAAA	AAAA	AAAA	AAAA	AAAA	AAAA	AAAA	AAAA	AAAA	AAAA	AAAA	AAAA	AAAA	AAAA	AAAA	AAAA	AAAA	AAAA	AAAA	AAAA	AAAA	AAAA	AAAA	AAAA	AAAA	AAAA	AAAA	AAAA	AAAA	AAAA	AAAA	AAAA	AAAA	AAAA	AAAA	AAAA	AAAA	AAAA
PotVar0003131	A	G	GGGG	GGGG	GGGG	GGGG	GGGG	GGGG	GGGG	GGGG	GGGG	GGGG	GGGG	GGGG	GGGG	GGGG	GGGG	GGGG	GGGG	GGGG	GGGG	GGGG	GGGG	GGGG	GGGG	GGGG	GGGG	GGGG	GGGG	GGGG	GGGG	GGGG	GGGG	GGGG	GGGG	AAGG	GGGG	GGGG	GGGG	GGGG	GGGG	GGGG	GGGG	GGGG	GGGG	GGGG	GGGG	GGGG	GGGG
PotVar0003151	T	C	TTTC	CCCC	TTTC	TTCC	TTCC	TTTT	TTTC	TTTC	TTTT	TTTC	TTCC	TCCC	TCCC	TTTC	TCCC	TTCC	TCCC	TTCC	TTCC	TCCC	TCCC	----	TTCC	TTTC	TTTC	TTTC	TTCC	TTCC	TTTC	TTCC	CCCC	TTCC	TTCC	TTCC	CCCC	TTTC	TCCC	TTCC	TTCC	TTCC	TTCC	TTTC	TTTC	TCCC	TCCC	CCCC	TTCC
PotVar0003207	A	G	GGGG	GGGG	GGGG	AGGG	GGGG	GGGG	GGGG	GGGG	GGGG	GGGG	AGGG	GGGG	GGGG	GGGG	GGGG	GGGG	GGGG	GGGG	AGGG	GGGG	GGGG	GGGG	GGGG	GGGG	AGGG	AGGG	GGGG	GGGG	GGGG	GGGG	GGGG	GGGG	GGGG	GGGG	GGGG	GGGG	GGGG	GGGG	GGGG	GGGG	GGGG	AGGG	GGGG	GGGG	GGGG	GGGG	GGGG
PotVar0003213	T	G	GGGG	GGGG	GGGG	GGGG	GGGG	GGGG	GGGG	GGGG	GGGG	GGGG	GGGG	GGGG	GGGG	GGGG	GGGG	GGGG	GGGG	GGGG	GGGG	GGGG	GGGG	GGGG	GGGG	GGGG	GGGG	GGGG	GGGG	GGGG	GGGG	GGGG	GGGG	GGGG	GGGG	GGGG	GGGG	GGGG	GGGG	GGGG	GGGG	GGGG	GGGG	GGGG	GGGG	GGGG	GGGG	GGGG	GGGG
PotVar0003215	A	G	AAAA	AAAA	AAAA	AAAA	AAAA	AAAA	AAAA	AAAA	AAAA	AAAA	AAAG	AAAA	AAAA	AAAA	AAAA	AAAA	AAAA	AAAA	AAAG	AAAA	AAAA	AAAA	AAAA	AAAA	AAAG	AAAG	AAAA	AAAA	AAAA	AAAA	AAAA	AAAA	AAAA	AAAA	AAAA	AAAA	AAAA	AAAA	AAAA	AAAA	AAAA	AAAG	AAAA	AAAA	AAAA	AAAA	AAAA
PotVar0003221	T	C	----	----	----	----	----	----	----	----	----	----	----	----	----	----	----	----	----	----	----	----	----	----	----	----	----	----	----	----	----	----	----	----	----	----	----	----	----	----	----	----	----	----	----	----	----	----	----
PotVar0003234	A	G	GGGG	GGGG	GGGG	GGGG	GGGG	GGGG	GGGG	GGGG	GGGG	GGGG	GGGG	GGGG	GGGG	GGGG	GGGG	GGGG	GGGG	GGGG	GGGG	GGGG	GGGG	GGGG	GGGG	GGGG	GGGG	GGGG	GGGG	GGGG	GGGG	GGGG	GGGG	GGGG	GGGG	GGGG	GGGG	GGGG	GGGG	GGGG	GGGG	GGGG	GGGG	GGGG	GGGG	GGGG	GGGG	GGGG	GGGG
PotVar0003253	T	C	TTCC	CCCC	CCCC	CCCC	CCCC	CCCC	TTCC	TCCC	TCCC	TCCC	CCCC	CCCC	CCCC	CCCC	TCCC	TCCC	CCCC	CCCC	CCCC	CCCC	CCCC	CCCC	CCCC	TTCC	TCCC	TCCC	CCCC	TCCC	CCCC	CCCC	CCCC	TCCC	CCCC	CCCC	CCCC	TTCC	CCCC	CCCC	CCCC	CCCC	TCCC	TCCC	CCCC	CCCC	CCCC	CCCC	CCCC
PotVar0003264	A	G	GGGG	GGGG	AAGG	GGGG	AAGG	AAGG	GGGG	AAGG	AAAG	GGGG	AAGG	GGGG	AGGG	AAAG	GGGG	AGGG	AGGG	AGGG	AAGG	AGGG	AGGG	AGGG	AGGG	GGGG	AGGG	AGGG	AGGG	----	AGGG	AGGG	GGGG	AGGG	AGGG	GGGG	GGGG	AGGG	AGGG	AGGG	GGGG	GGGG	AGGG	AAGG	AAAG	AGGG	GGGG	GGGG	GGGG
PotVar0003265	A	G	GGGG	GGGG	GGGG	GGGG	GGGG	GGGG	GGGG	GGGG	GGGG	GGGG	GGGG	GGGG	GGGG	GGGG	GGGG	GGGG	GGGG	GGGG	GGGG	GGGG	GGGG	GGGG	GGGG	GGGG	GGGG	GGGG	GGGG	GGGG	GGGG	GGGG	GGGG	GGGG	GGGG	GGGG	GGGG	GGGG	GGGG	GGGG	GGGG	GGGG	GGGG	GGGG	GGGG	GGGG	GGGG	GGGG	GGGG
PotVar0003273	A	G	----	----	----	----	----	----	----	----	----	----	----	----	----	----	----	----	----	----	----	----	----	----	----	----	----	----	----	----	----	----	----	----	----	----	----	----	----	----	----	----	----	----	----	----	----	----	----
PotVar0003302	T	C	CCCC	TCCC	CCCC	CCCC	CCCC	CCCC	CCCC	CCCC	CCCC	CCCC	CCCC	CCCC	CCCC	CCCC	TCCC	CCCC	CCCC	CCCC	CCCC	CCCC	CCCC	CCCC	CCCC	CCCC	CCCC	CCCC	TCCC	TCCC	CCCC	CCCC	CCCC	TCCC	CCCC	CCCC	CCCC	CCCC	CCCC	CCCC	CCCC	TCCC	CCCC	CCCC	CCCC	CCCC	CCCC	CCCC	CCCC
PotVar0003313	A	C	ACCC	AAAA	ACCC	AAAC	AACC	CCCC	ACCC	ACCC	CCCC	ACCC	AACC	AAAC	AAAC	ACCC	AAAC	AACC	AAAC	AAAC	AACC	AAAC	AAAC	AACC	AACC	ACCC	ACCC	ACCC	AACC	AACC	ACCC	AACC	AAAA	AACC	AACC	AACC	AAAA	ACCC	AAAC	AAAC	AAAC	AAAC	AACC	ACCC	ACCC	AAAC	AAAA	AAAA	AACC
PotVar0003368	T	C	----	----	----	----	----	----	----	----	----	----	----	----	----	----	----	----	----	----	----	----	----	----	----	----	----	----	----	----	----	----	----	----	----	----	----	----	----	----	----	----	----	----	----	----	----	----	----
PotVar0003373	A	G	GGGG	AGGG	GGGG	GGGG	GGGG	GGGG	GGGG	GGGG	GGGG	GGGG	GGGG	GGGG	GGGG	GGGG	AGGG	GGGG	GGGG	GGGG	GGGG	GGGG	GGGG	GGGG	GGGG	GGGG	GGGG	GGGG	AGGG	AGGG	GGGG	GGGG	GGGG	AGGG	GGGG	GGGG	GGGG	GGGG	GGGG	GGGG	GGGG	AGGG	GGGG	GGGG	GGGG	GGGG	GGGG	GGGG	GGGG
PotVar0003379	T	C	TTCC	CCCC	TCCC	TCCC	CCCC	CCCC	TTTC	TCCC	TCCC	TTCC	CCCC	TCCC	CCCC	CCCC	TCCC	TCCC	CCCC	CCCC	CCCC	CCCC	CCCC	CCCC	CCCC	TTCC	TCCC	TCCC	CCCC	TCCC	TTCC	CCCC	CCCC	TCCC	CCCC	CCCC	CCCC	TTCC	CCCC	CCCC	CCCC	TCCC	TTCC	TCCC	CCCC	CCCC	CCCC	CCCC	TTCC
PotVar0003425	T	G	GGGG	GGGG	GGGG	GGGG	GGGG	GGGG	GGGG	GGGG	GGGG	GGGG	GGGG	GGGG	GGGG	GGGG	GGGG	GGGG	GGGG	GGGG	GGGG	GGGG	GGGG	GGGG	GGGG	GGGG	GGGG	GGGG	GGGG	GGGG	GGGG	GGGG	GGGG	GGGG	GGGG	GGGG	GGGG	GGGG	GGGG	GGGG	GGGG	GGGG	GGGG	GGGG	GGGG	GGGG	GGGG	GGGG	GGGG
PotVar0003426	T	C	TTTT	TTTT	TTTT	TTTT	TTTT	TTTT	TTTT	TTTT	TTTT	TTTT	TTTT	TTTT	TTTT	TTTT	TTTT	TTTT	TTTT	TTTT	TTTT	TTTT	TTTT	TTTT	TTTT	TTTT	TTTT	TTTT	TTTT	TTTT	TTTT	TTTT	TTTT	TTTT	TTTT	TTTT	TTTT	TTTT	TTTT	TTTT	TTTT	TTTT	TTTT	TTTT	TTTT	TTTT	TTTT	TTTT	TTTT
PotVar0003427	T	C	TCCC	TTTC	TCCC	TTCC	TTCC	CCCC	TCCC	TCCC	CCCC	TCCC	TTCC	TTTC	TTTC	TCCC	TTCC	TTCC	TTTC	TTCC	TTCC	TTTC	TTTC	TTTC	TTCC	TCCC	TCCC	TCCC	TCCC	TCCC	TCCC	TTCC	TTTT	TCCC	TTCC	TTCC	TTTT	TCCC	TTTC	TTCC	TTCC	TTCC	TTCC	TCCC	TCCC	TTTC	TTTC	TTTT	TTCC
PotVar0003428	A	G	GGGG	GGGG	GGGG	AGGG	GGGG	GGGG	GGGG	GGGG	GGGG	GGGG	GGGG	GGGG	GGGG	GGGG	GGGG	GGGG	GGGG	GGGG	GGGG	GGGG	GGGG	GGGG	GGGG	GGGG	GGGG	GGGG	GGGG	GGGG	GGGG	GGGG	GGGG	GGGG	GGGG	GGGG	GGGG	GGGG	GGGG	AGGG	GGGG	GGGG	GGGG	GGGG	GGGG	GGGG	AGGG	GGGG	GGGG
PotVar0003442	T	C	TCCC	CCCC	CCCC	CCCC	CCCC	TTCC	CCCC	CCCC	CCCC	TCCC	CCCC	CCCC	CCCC	CCCC	CCCC	CCCC	CCCC	CCCC	CCCC	CCCC	CCCC	----	TCCC	TCCC	CCCC	CCCC	TCCC	CCCC	CCCC	TCCC	CCCC	CCCC	TCCC	CCCC	CCCC	CCCC	CCCC	CCCC	TTCC	CCCC	CCCC	CCCC	CCCC	CCCC	CCCC	CCCC	CCCC
PotVar0003444	T	C	TTTT	TTCC	TTTT	TTTC	TTTT	TTTT	TTTT	TTTT	TTTT	TTTT	TTTC	TTTC	TTTT	TTTT	TTTT	TTTC	TTCC	TTTT	TTTT	TTCC	TTTC	TTTT	TTTT	TTTC	TTTT	TTTT	TTTC	TTTC	TTTC	TTTC	TTTT	TTTC	TTTT	TTCC	TTTC	TTTT	TTTC	TTTT	TTTC	TTTC	TTTT	TTTT	TTTC	TTTC	TTTT	TTTC	TTTT
PotVar0003452	T	G	TTTT	TTTT	TTGG	TTTT	TTGG	TTGG	TTTT	TTGG	TGGG	TTTT	TTGG	TTTT	TTTG	TGGG	TTTG	TTTG	TTTG	TTTG	TTGG	TTTG	TTTG	TTTG	TTTG	TTTT	TTGG	TTGG	TTTG	TTTG	TTTG	TTTG	TTTT	TTTG	TTTG	TTTT	TTTT	TTTG	TTTG	TTTG	TTTT	TTTT	TTTT	TTGG	TTGG	TTTG	TTTT	TTTT	TTTT
PotVar0003459	T	C	TCCC	TTCC	TTTC	TTTC	TTCC	TTTT	TCCC	TTCC	TTTC	TTCC	TTTC	TTCC	TCCC	TTTC	TCCC	TTCC	TTTC	TCCC	TTCC	TTTC	TTCC	TTCC	TTCC	TTCC	TTCC	TTCC	TTTC	TTCC	TTTT	TTTT	CCCC	TTCC	TTCC	TTTT	TCCC	TCCC	TTCC	TTCC	TTTT	TTCC	CCCC	TTCC	TTTC	TTCC	TCCC	TCCC	TTCC
PotVar0003462	T	G	TGGG	GGGG	GGGG	GGGG	GGGG	TTGG	GGGG	GGGG	GGGG	TGGG	GGGG	GGGG	GGGG	GGGG	GGGG	GGGG	GGGG	GGGG	GGGG	GGGG	GGGG	TGGG	TGGG	TGGG	GGGG	GGGG	TGGG	GGGG	GGGG	TGGG	GGGG	GGGG	TGGG	GGGG	GGGG	GGGG	GGGG	GGGG	TGGG	GGGG	GGGG	GGGG	GGGG	GGGG	GGGG	GGGG	GGGG
PotVar0003481	A	G	----	----	----	----	----	----	----	----	----	----	----	----	----	----	----	----	----	----	----	----	----	----	----	----	----	----	----	----	----	----	----	----	----	----	----	----	----	----	----	----	----	----	----	----	----	----	----
PotVar0003490	T	G	TTTT	TTTT	TTTT	TTTT	TTTT	TTTT	TTTT	TTTT	TTTT	TTTT	TTTT	TTTT	TTTT	TTTT	TTTT	TTTT	TTTT	TTTT	TTTT	TTTT	TTTT	TTTT	TTTT	TTTT	TTTT	TTTT	TTTT	TTTT	TTTT	TTTT	TTTT	TTTT	TTTT	TTTT	TTTT	TTTT	TTTT	TTTT	TTTT	TTTT	TTTT	TTTT	TTTT	TTTT	TTTT	TTTT	TTTT
PotVar0003500	T	C	TTTT	TTTT	TTTT	TTTC	TTTT	TTTT	TTTT	TTTT	TTTT	TTTT	TTTT	TTTT	TTTT	TTTT	TTTT	TTTT	TTTT	TTTT	TTTT	TTTT	TTTT	TTTT	TTTT	TTTT	TTTT	TTTT	TTTT	TTTT	TTTT	TTTT	TTTT	TTTT	TTTT	TTTT	TTTT	TTTT	TTTT	TTTC	TTCC	TTTT	TTTT	TTTT	TTTT	TTTT	TTTC	TTTT	TTTT
PotVar0003501	A	G	GGGG	GGGG	GGGG	GGGG	GGGG	GGGG	GGGG	GGGG	GGGG	GGGG	GGGG	GGGG	GGGG	GGGG	GGGG	GGGG	GGGG	GGGG	GGGG	GGGG	GGGG	GGGG	GGGG	GGGG	GGGG	GGGG	GGGG	GGGG	GGGG	GGGG	GGGG	GGGG	GGGG	GGGG	GGGG	GGGG	GGGG	GGGG	GGGG	GGGG	GGGG	GGGG	GGGG	GGGG	GGGG	GGGG	GGGG
PotVar0003502	A	G	----	----	----	----	----	----	----	----	----	----	----	----	----	----	----	----	----	----	----	----	----	----	----	----	----	----	----	----	----	----	----	----	----	----	----	----	----	----	----	----	----	----	----	----	----	----	----
PotVar0003528	T	G	----	----	----	----	----	----	----	----	----	----	----	----	----	----	----	----	----	----	----	----	----	----	----	----	----	----	----	----	----	----	----	----	----	----	----	----	----	----	----	----	----	----	----	----	----	----	----
PotVar0003529	A	G	GGGG	GGGG	AGGG	AGGG	GGGG	GGGG	AGGG	GGGG	GGGG	AGGG	GGGG	AGGG	GGGG	GGGG	GGGG	GGGG	GGGG	GGGG	GGGG	GGGG	GGGG	GGGG	GGGG	GGGG	GGGG	GGGG	GGGG	GGGG	AAGG	GGGG	GGGG	GGGG	GGGG	GGGG	GGGG	GGGG	GGGG	GGGG	GGGG	AAGG	GGGG	GGGG	GGGG	GGGG	GGGG	GGGG	AAGG
PotVar0003546	A	G	AGGG	GGGG	GGGG	GGGG	GGGG	AAGG	GGGG	GGGG	GGGG	AGGG	GGGG	GGGG	GGGG	GGGG	GGGG	GGGG	GGGG	GGGG	GGGG	GGGG	GGGG	AGGG	AGGG	AGGG	GGGG	GGGG	AGGG	GGGG	GGGG	AGGG	GGGG	GGGG	AGGG	GGGG	GGGG	GGGG	GGGG	GGGG	AGGG	GGGG	GGGG	GGGG	GGGG	GGGG	GGGG	GGGG	GGGG
PotVar0003609	T	C	TTTC	TTTT	TTCC	TTTT	TTCC	CCCC	TTTT	TTCC	TCCC	TTTC	TTCC	TTTT	TTTC	TCCC	TTTC	TTTC	TTTC	TTTC	TTCC	TTTC	TTTC	TTCC	TTCC	TTTC	TTCC	TTCC	TTCC	TTCC	TTTC	TTCC	TTTT	TTTC	TTCC	TTTT	TTTT	TTTC	TTTC	TTTC	TTTC	TTTT	TTTT	TTCC	TTCC	TTTC	TTTT	TTTT	TTTT
PotVar0003610	T	C	TTTT	TTTT	TTTT	TTTT	TTTT	TTTT	TTTT	TTTT	TTTT	TTTT	TTTT	TTTT	TTTT	TTTT	TTTT	TTTT	TTTT	TTTT	TTTT	TTTT	TTTT	TTTT	TTTT	TTTT	TTTT	TTTT	TTTT	TTTT	TTTT	TTTC	TTTT	TTTT	TTTT	TTTT	TTTT	TTTT	TTTT	TTTT	TTTT	TTTT	TTTT	TTTT	TTTT	TTTT	TTTT	TTTT	TTTT
PotVar0003625	T	C	CCCC	CCCC	CCCC	CCCC	CCCC	CCCC	CCCC	CCCC	CCCC	CCCC	CCCC	CCCC	CCCC	CCCC	CCCC	CCCC	CCCC	CCCC	CCCC	CCCC	CCCC	CCCC	CCCC	CCCC	CCCC	CCCC	CCCC	CCCC	CCCC	TCCC	CCCC	CCCC	CCCC	CCCC	CCCC	CCCC	CCCC	CCCC	CCCC	CCCC	CCCC	CCCC	CCCC	CCCC	CCCC	CCCC	CCCC
PotVar0003627	A	G	----	----	----	----	----	----	----	----	----	----	----	----	----	----	----	----	----	----	----	----	----	----	----	----	----	----	----	----	----	----	----	----	----	----	----	----	----	----	----	----	----	----	----	----	----	----	----
PotVar0003635	A	G	----	----	----	----	----	----	----	----	----	----	----	----	----	----	----	----	----	----	----	----	----	----	----	----	----	----	----	----	----	----	----	----	----	----	----	----	----	----	----	----	----	----	----	----	----	----	----
PotVar0003645	T	C	TTTC	TTCC	TCCC	TCCC	TTCC	CCCC	TTTC	TTCC	TCCC	TTCC	TCCC	TTCC	TTTC	TCCC	TTTC	TTTC	TCCC	TTTC	TTCC	TCCC	TTTC	----	TTCC	TTTC	TTCC	TTCC	TTCC	TTCC	CCCC	CCCC	TTTT	TTTC	TTCC	CCCC	TTTC	TTTC	TTCC	TTCC	CCCC	TCCC	TTTT	TTCC	TCCC	TTCC	TTTC	TTTC	TTCC
PotVar0003646	T	C	----	----	----	----	----	----	----	----	----	----	----	----	----	----	----	----	----	----	----	----	----	----	----	----	----	----	----	----	----	----	----	----	----	----	----	----	----	----	----	----	----	----	----	----	----	----	----
PotVar0003649	A	C	----	----	----	----	----	----	----	----	----	----	----	----	----	----	----	----	----	----	----	----	----	----	----	----	----	----	----	----	----	----	----	----	----	----	----	----	----	----	----	----	----	----	----	----	----	----	----
PotVar0003652	A	G	----	----	----	----	----	----	----	----	----	----	----	----	----	----	----	----	----	----	----	----	----	----	----	----	----	----	----	----	----	----	----	----	----	----	----	----	----	----	----	----	----	----	----	----	----	----	----
PotVar0003658	A	G	----	----	----	----	----	----	----	----	----	----	----	----	----	----	----	----	----	----	----	----	----	----	----	----	----	----	----	----	----	----	----	----	----	----	----	----	----	----	----	----	----	----	----	----	----	----	----
PotVar0003667	T	C	CCCC	CCCC	CCCC	TCCC	CCCC	CCCC	CCCC	CCCC	CCCC	CCCC	CCCC	CCCC	CCCC	CCCC	CCCC	CCCC	CCCC	CCCC	CCCC	CCCC	CCCC	CCCC	CCCC	CCCC	CCCC	CCCC	CCCC	CCCC	CCCC	CCCC	CCCC	CCCC	CCCC	CCCC	CCCC	CCCC	CCCC	CCCC	TTCC	CCCC	CCCC	CCCC	CCCC	CCCC	CCCC	CCCC	CCCC
PotVar0003686	A	C	CCCC	CCCC	CCCC	CCCC	CCCC	CCCC	CCCC	CCCC	CCCC	CCCC	CCCC	CCCC	CCCC	CCCC	CCCC	CCCC	CCCC	CCCC	CCCC	CCCC	CCCC	CCCC	CCCC	CCCC	CCCC	CCCC	CCCC	CCCC	CCCC	CCCC	CCCC	CCCC	CCCC	AACC	CCCC	CCCC	CCCC	CCCC	CCCC	CCCC	CCCC	CCCC	CCCC	CCCC	CCCC	CCCC	CCCC
PotVar0003713	T	G	TTTG	TTTT	TTGG	TTTG	TTGG	GGGG	TTTT	TTGG	TGGG	TTTG	TTGG	TTTT	TTTG	TGGG	TTTG	TTTG	TTTG	TTTG	TTGG	TTTG	TTTG	TTGG	TTGG	TTTG	TTGG	TTGG	TTGG	TTGG	TTGG	TTGG	TTTT	TTTG	TTGG	TTGG	TTTT	TTTG	TTTG	TTGG	TGGG	TTTT	TTTT	TTGG	TTGG	TTTG	TTTG	TTTT	TTTT
PotVar0003717	T	G	TTTT	TTTT	TTTT	TTTT	TTTT	TTTT	TTTT	TTTT	TTTT	TTTT	TTTT	TTTT	TTTT	TTTT	TTTT	TTTT	TTTT	TTTT	TTTT	TTTT	TTTT	TTTT	TTTT	TTTT	TTTT	TTTT	TTTT	TTTT	TTTT	TTTG	TTTT	TTTT	TTTT	TTTT	TTTT	TTTT	TTTT	TTTT	TTTT	TTTT	TTTT	TTTT	TTTT	TTTT	TTTT	TTTT	TTTT
PotVar0003718	T	C	----	----	----	----	----	----	----	----	----	----	----	----	----	----	----	----	----	----	----	----	----	----	----	----	----	----	----	----	----	----	----	----	----	----	----	----	----	----	----	----	----	----	----	----	----	----	----
PotVar0003722	A	G	GGGG	GGGG	GGGG	GGGG	GGGG	GGGG	GGGG	GGGG	GGGG	GGGG	GGGG	GGGG	GGGG	GGGG	GGGG	GGGG	GGGG	GGGG	GGGG	GGGG	GGGG	GGGG	GGGG	GGGG	GGGG	GGGG	GGGG	GGGG	GGGG	AGGG	GGGG	GGGG	GGGG	GGGG	GGGG	GGGG	GGGG	GGGG	GGGG	AGGG	GGGG	GGGG	GGGG	GGGG	GGGG	GGGG	GGGG
PotVar0003726	A	G	AGGG	AAGG	AAGG	AAGG	AAGG	AAAA	GGGG	AAGG	AAAG	AGGG	AAAG	AGGG	AGGG	AAAG	AGGG	AGGG	AAAG	AGGG	AAGG	AAAG	AGGG	----	AAGG	AGGG	AAGG	AAGG	AAGG	AAGG	AAGG	AAAA	GGGG	AGGG	AAGG	AAAA	AGGG	AGGG	AAGG	----	AAAA	AGGG	GGGG	AAGG	AAAG	AAGG	----	AGGG	GGGG
PotVar0003733	T	C	TTTC	TTTT	TTCC	TTTC	TTCC	CCCC	TTTT	TTCC	TCCC	TTTC	TTCC	TTTT	TTTC	TCCC	TTTC	TTTC	TTTC	TTTC	TTCC	TTTC	TTTC	TTCC	TTCC	TTTC	TTCC	TTCC	TTCC	TTCC	TTCC	TTCC	TTTT	TTTC	TTCC	TTTT	TTTT	TTTC	TTTC	TTCC	TCCC	TTTT	TTTT	TTCC	TTCC	TTTC	TTTC	TTTT	TTTT
PotVar0003749	A	G	----	----	----	----	----	----	----	----	----	----	----	----	----	----	----	----	----	----	----	----	----	----	----	----	----	----	----	----	----	----	----	----	----	----	----	----	----	----	----	----	----	----	----	----	----	----	----
PotVar0003750	A	C	----	----	----	----	----	----	----	----	----	----	----	----	----	----	----	----	----	----	----	----	----	----	----	----	----	----	----	----	----	----	----	----	----	----	----	----	----	----	----	----	----	----	----	----	----	----	----
PotVar0003761	T	C	TTTC	TTTT	TTTT	TTTC	TTTT	TTCC	TTTT	TTTT	TTTT	TTTC	TTTT	TTTT	TTTT	TTTT	TTTT	TTTT	TTTT	TTTT	TTTT	TTTT	TTTT	TTTC	TTTC	TTTC	TTTT	TTTT	TTTC	TTTT	TTTT	TTTC	TTTT	TTTT	TTTC	TTCC	TTTT	TTTT	TTTT	TTTC	TCCC	TTTT	TTTT	TTTT	TTTT	TTTT	TTTC	TTTT	TTTT
PotVar0003781	T	C	CCCC	CCCC	CCCC	CCCC	CCCC	CCCC	CCCC	CCCC	CCCC	CCCC	CCCC	CCCC	CCCC	CCCC	CCCC	CCCC	CCCC	CCCC	CCCC	CCCC	CCCC	CCCC	CCCC	CCCC	CCCC	CCCC	CCCC	CCCC	CCCC	CCCC	CCCC	CCCC	CCCC	CCCC	CCCC	CCCC	CCCC	CCCC	CCCC	CCCC	CCCC	CCCC	CCCC	CCCC	CCCC	CCCC	CCCC
PotVar0003785	T	G	GGGG	GGGG	GGGG	GGGG	GGGG	GGGG	GGGG	GGGG	GGGG	GGGG	GGGG	GGGG	GGGG	GGGG	GGGG	GGGG	GGGG	GGGG	GGGG	GGGG	GGGG	GGGG	GGGG	GGGG	GGGG	GGGG	GGGG	GGGG	GGGG	GGGG	GGGG	GGGG	GGGG	GGGG	GGGG	GGGG	GGGG	GGGG	GGGG	GGGG	GGGG	GGGG	GGGG	GGGG	GGGG	GGGG	GGGG
PotVar0003791	A	G	GGGG	AAGG	GGGG	AGGG	GGGG	GGGG	GGGG	GGGG	GGGG	GGGG	AGGG	AGGG	GGGG	GGGG	GGGG	GGGG	AAGG	GGGG	GGGG	AAGG	GGGG	GGGG	GGGG	GGGG	GGGG	GGGG	GGGG	GGGG	GGGG	AGGG	GGGG	GGGG	GGGG	AAGG	AGGG	GGGG	AGGG	GGGG	AGGG	GGGG	GGGG	GGGG	AGGG	AGGG	GGGG	AGGG	GGGG
PotVar0003792	T	C	CCCC	TTCC	CCCC	TCCC	CCCC	CCCC	CCCC	CCCC	CCCC	CCCC	TCCC	TCCC	CCCC	CCCC	CCCC	CCCC	TTCC	CCCC	CCCC	TTCC	CCCC	CCCC	CCCC	CCCC	CCCC	CCCC	CCCC	CCCC	CCCC	TCCC	CCCC	CCCC	CCCC	TTCC	TCCC	CCCC	TCCC	CCCC	TCCC	CCCC	CCCC	CCCC	TCCC	TCCC	CCCC	TCCC	CCCC
PotVar0003975	A	C	CCCC	CCCC	CCCC	CCCC	CCCC	CCCC	CCCC	CCCC	CCCC	CCCC	CCCC	CCCC	CCCC	CCCC	ACCC	CCCC	CCCC	CCCC	CCCC	CCCC	CCCC	CCCC	CCCC	CCCC	ACCC	ACCC	CCCC	CCCC	CCCC	CCCC	CCCC	CCCC	CCCC	CCCC	CCCC	CCCC	ACCC	CCCC	CCCC	CCCC	CCCC	CCCC	CCCC	ACCC	CCCC	CCCC	CCCC
PotVar0003980	A	G	AAAA	AAAA	AAAA	AAAA	AAAA	AAAA	AAAA	AAAA	AAAA	AAAA	AAAA	AAAA	AAAA	AAAA	AAAA	AAAA	AAAA	AAAA	AAAA	AAAA	AAAA	AAAG	AAAG	AAAA	AAAA	AAAA	AAAA	AAAA	AAAA	AAAA	AAAA	AAAA	AAAG	AAAA	AAAA	AAAA	AAAA	AAAA	AAAA	AAAA	AAAA	AAAA	AAAA	AAAA	AAAA	AAAA	AAAA
PotVar0003983	T	C	TTCC	CCCC	TTCC	TCCC	TTCC	TTCC	CCCC	TCCC	TCCC	CCCC	TTTC	TCCC	TCCC	TCCC	CCCC	TTTC	CCCC	CCCC	CCCC	TTCC	TTCC	CCCC	CCCC	TCCC	TCCC	TCCC	TTCC	TCCC	TCCC	TCCC	CCCC	TCCC	CCCC	TCCC	CCCC	CCCC	TTCC	CCCC	TCCC	CCCC	TTCC	TCCC	CCCC	TCCC	TCCC	CCCC	TTCC
PotVar0003996	T	C	----	----	----	----	----	----	----	----	----	----	----	----	----	----	----	----	----	----	----	----	----	----	----	----	----	----	----	----	----	----	----	----	----	----	----	----	----	----	----	----	----	----	----	----	----	----	----
PotVar0004013	T	C	----	----	----	----	----	----	----	----	----	----	----	----	----	----	----	----	----	----	----	----	----	----	----	----	----	----	----	----	----	----	----	----	----	----	----	----	----	----	----	----	----	----	----	----	----	----	----
PotVar0004028	T	C	----	----	----	----	----	----	----	----	----	----	----	----	----	----	----	----	----	----	----	----	----	----	----	----	----	----	----	----	----	----	----	----	----	----	----	----	----	----	----	----	----	----	----	----	----	----	----
PotVar0004033	T	C	----	----	----	----	----	----	----	----	----	----	----	----	----	----	----	----	----	----	----	----	----	----	----	----	----	----	----	----	----	----	----	----	----	----	----	----	----	----	----	----	----	----	----	----	----	----	----
PotVar0004038	T	C	TTTT	TTTT	TTTT	TTTT	TTTT	TTTT	TTTT	TTTT	TTTT	TTTT	TTTT	TTTT	TTTT	TTTT	TTTC	TTTT	TTTT	TTTT	TTTT	TTTT	TTTT	TTTC	TTTC	TTTT	TTTC	TTTC	TTTT	TTTT	TTTT	TTTT	TTTT	TTTT	TTTC	TTTT	TTTT	TTTT	TTTC	TTTT	TTTT	TTTT	TTTT	TTTT	TTTT	TTTC	TTTT	TTTT	TTTT
PotVar0004040	T	C	TTTT	TTTT	TTTT	TTTT	TTTT	TTTT	TTTT	TTTT	TTTC	TTTC	TTTT	TTTT	TTTT	TTTT	TTTT	TTTT	TTTT	TTTC	TTTT	TTTT	TTTC	TTTT	TTTT	TTTC	TTTT	TTTT	TTTC	TTTC	TTTC	TTTT	TTTC	TTTT	TTTT	TTTT	TTTC	TTTT	TTTT	TTTC	TTTT	TTTT	TTTC	TTTT	TTTT	TTTT	TTTC	TTTT	TTTT
PotVar0004060	T	G	----	----	----	----	----	----	----	----	----	----	----	----	----	----	----	----	----	----	----	----	----	----	----	----	----	----	----	----	----	----	----	----	----	----	----	----	----	----	----	----	----	----	----	----	----	----	----
PotVar0004130	T	G	----	----	----	----	----	----	----	----	----	----	----	----	----	----	----	----	----	----	----	----	----	----	----	----	----	----	----	----	----	----	----	----	----	----	----	----	----	----	----	----	----	----	----	----	----	----	----
PotVar0004131	A	G	----	----	----	----	----	----	----	----	----	----	----	----	----	----	----	----	----	----	----	----	----	----	----	----	----	----	----	----	----	----	----	----	----	----	----	----	----	----	----	----	----	----	----	----	----	----	----
PotVar0004159	A	G	GGGG	GGGG	GGGG	GGGG	GGGG	GGGG	GGGG	GGGG	GGGG	GGGG	GGGG	GGGG	GGGG	GGGG	GGGG	GGGG	GGGG	GGGG	GGGG	GGGG	GGGG	GGGG	GGGG	GGGG	GGGG	GGGG	GGGG	GGGG	GGGG	GGGG	GGGG	GGGG	GGGG	GGGG	GGGG	GGGG	GGGG	GGGG	GGGG	GGGG	GGGG	GGGG	GGGG	AGGG	GGGG	GGGG	GGGG
PotVar0004164	A	G	----	----	----	----	----	----	----	----	----	----	----	----	----	----	----	----	----	----	----	----	----	----	----	----	----	----	----	----	----	----	----	----	----	----	----	----	----	----	----	----	----	----	----	----	----	----	----
PotVar0004166	A	G	GGGG	GGGG	GGGG	AGGG	AGGG	GGGG	GGGG	AGGG	GGGG	GGGG	GGGG	AGGG	GGGG	AGGG	GGGG	GGGG	GGGG	GGGG	GGGG	----	GGGG	AGGG	GGGG	GGGG	AGGG	AGGG	GGGG	GGGG	AGGG	AGGG	GGGG	GGGG	GGGG	AAGG	AGGG	GGGG	AGGG	GGGG	AGGG	GGGG	GGGG	GGGG	GGGG	AGGG	AGGG	GGGG	GGGG
PotVar0004366	A	C	AACC	AAAA	ACCC	AACC	AAAC	ACCC	AACC	----	AAAC	----	AACC	AACC	AACC	ACCC	ACCC	AAAC	AAAA	AAAC	AACC	ACCC	AAAA	AACC	AAAA	AAAA	AACC	AACC	AAAA	AAAC	AACC	ACCC	AAAC	AACC	AAAA	----	AAAC	AAAA	ACCC	AAAC	----	AAAC	AAAC	AACC	AACC	AACC	AACC	AAAC	AAAA
PotVar0004372	A	G	AAAG	AAAA	AAAG	AAAG	AAAA	AAAG	AAAG	AAGG	AAAG	AAAG	AAAA	AAAA	AAAG	AGGG	AAAG	AAAG	AAAA	AAAG	AAAG	AAGG	AAAA	AAAA	AAAA	AAAA	AAGG	AAGG	AAAA	AAAA	AAAA	AAAA	AAAA	AAGG	AAAA	AAGG	AAAG	AAAA	AAAG	AAGG	AAGG	AAAG	AAAA	AAAA	AAAA	AAAA	AAAG	AAAG	AAAA
PotVar0004373	T	C	CCCC	CCCC	CCCC	TCCC	CCCC	TCCC	CCCC	TCCC	CCCC	CCCC	CCCC	CCCC	TCCC	TTCC	TCCC	TCCC	CCCC	TCCC	TCCC	TCCC	CCCC	CCCC	CCCC	CCCC	TTCC	TTCC	CCCC	CCCC	CCCC	CCCC	CCCC	TCCC	CCCC	TCCC	CCCC	CCCC	TCCC	TCCC	CCCC	CCCC	CCCC	CCCC	CCCC	CCCC	TCCC	TCCC	CCCC
PotVar0004381	A	C	----	----	----	----	----	----	----	----	----	----	----	----	----	----	----	----	----	----	----	----	----	----	----	----	----	----	----	----	----	----	----	----	----	----	----	----	----	----	----	----	----	----	----	----	----	----	----
PotVar0004425	T	G	----	----	----	----	----	----	----	----	----	----	----	----	----	----	----	----	----	----	----	----	----	----	----	----	----	----	----	----	----	----	----	----	----	----	----	----	----	----	----	----	----	----	----	----	----	----	----
PotVar0004449	T	C	----	----	----	----	----	----	----	----	----	----	----	----	----	----	----	----	----	----	----	----	----	----	----	----	----	----	----	----	----	----	----	----	----	----	----	----	----	----	----	----	----	----	----	----	----	----	----
PotVar0004484	T	C	TCCC	TTCC	CCCC	TCCC	TCCC	CCCC	CCCC	CCCC	TCCC	TCCC	CCCC	----	CCCC	CCCC	TCCC	TTCC	TTCC	TTCC	TCCC	CCCC	CCCC	CCCC	CCCC	TCCC	CCCC	CCCC	TTCC	----	TCCC	CCCC	TCCC	TTTC	CCCC	CCCC	CCCC	CCCC	CCCC	CCCC	CCCC	CCCC	TTCC	CCCC	TCCC	TCCC	CCCC	TCCC	TCCC
PotVar0004494	A	C	AAAA	AAAA	AAAA	AAAA	AAAA	AAAA	AAAA	AAAA	AAAA	AAAA	AAAA	AAAA	AAAA	AAAA	AAAA	AAAA	AACC	AAAA	AAAA	AAAC	AAAA	AAAA	AAAA	AAAA	AACC	AACC	AAAA	AAAA	AAAA	AAAC	AAAC	AAAA	AAAA	AACC	AAAA	AAAC	AAAA	AAAA	AACC	AAAC	AAAA	AAAA	AAAC	AAAA	AAAC	AAAA	AAAA
PotVar0004495	A	C	AAAA	AAAA	AAAA	AAAA	AAAA	AAAA	AAAA	AAAA	AAAA	AAAA	AAAA	AAAA	AAAA	AAAA	AAAA	AAAA	AAAA	AAAA	AAAA	AAAA	AAAA	AAAA	AAAA	AAAA	AAAA	AAAA	AAAA	AAAA	AAAA	AAAA	AAAA	AAAA	AAAA	AAAC	AAAA	AAAA	AAAA	AAAA	AAAA	AAAA	AAAA	AAAA	AAAA	AAAA	AAAA	AAAA	AAAA
PotVar0004505	T	C	----	----	----	----	----	----	----	----	----	----	----	----	----	----	----	----	----	----	----	----	----	----	----	----	----	----	----	----	----	----	----	----	----	----	----	----	----	----	----	----	----	----	----	----	----	----	----
PotVar0004533	T	C	----	----	----	----	----	----	----	----	----	----	----	----	----	----	----	----	----	----	----	----	----	----	----	----	----	----	----	----	----	----	----	----	----	----	----	----	----	----	----	----	----	----	----	----	----	----	----
PotVar0004559	A	G	----	----	----	----	----	----	----	----	----	----	----	----	----	----	----	----	----	----	----	----	----	----	----	----	----	----	----	----	----	----	----	----	----	----	----	----	----	----	----	----	----	----	----	----	----	----	----
PotVar0004562	A	C	----	----	----	----	----	----	----	----	----	----	----	----	----	----	----	----	----	----	----	----	----	----	----	----	----	----	----	----	----	----	----	----	----	----	----	----	----	----	----	----	----	----	----	----	----	----	----
PotVar0004591	A	G	GGGG	GGGG	GGGG	GGGG	GGGG	GGGG	GGGG	GGGG	GGGG	GGGG	GGGG	GGGG	GGGG	GGGG	GGGG	GGGG	GGGG	GGGG	GGGG	GGGG	GGGG	GGGG	GGGG	GGGG	GGGG	GGGG	GGGG	GGGG	GGGG	GGGG	GGGG	GGGG	GGGG	GGGG	GGGG	GGGG	GGGG	GGGG	AGGG	GGGG	GGGG	GGGG	GGGG	GGGG	GGGG	GGGG	GGGG
PotVar0004602	A	G	----	----	----	----	----	----	----	----	----	----	----	----	----	----	----	----	----	----	----	----	----	----	----	----	----	----	----	----	----	----	----	----	----	----	----	----	----	----	----	----	----	----	----	----	----	----	----
PotVar0004629	T	C	----	----	----	----	----	----	----	----	----	----	----	----	----	----	----	----	----	----	----	----	----	----	----	----	----	----	----	----	----	----	----	----	----	----	----	----	----	----	----	----	----	----	----	----	----	----	----
PotVar0004666	A	G	GGGG	GGGG	AGGG	AGGG	AGGG	AGGG	AGGG	GGGG	AAGG	AAGG	AGGG	GGGG	AGGG	AGGG	GGGG	GGGG	AAGG	AGGG	AGGG	AAGG	GGGG	GGGG	GGGG	AGGG	AAGG	AAGG	GGGG	AGGG	AGGG	AAGG	AGGG	GGGG	GGGG	AAGG	GGGG	AGGG	GGGG	AGGG	AAGG	AGGG	GGGG	GGGG	AGGG	AGGG	AAGG	GGGG	AGGG
PotVar0004674	T	C	CCCC	CCCC	TCCC	TCCC	TCCC	TCCC	TCCC	CCCC	TTCC	TTCC	TCCC	CCCC	TCCC	TCCC	CCCC	CCCC	CCCC	TCCC	TCCC	TCCC	CCCC	CCCC	CCCC	TCCC	CCCC	CCCC	CCCC	TCCC	TCCC	TCCC	CCCC	CCCC	CCCC	CCCC	CCCC	CCCC	CCCC	TCCC	CCCC	CCCC	CCCC	CCCC	CCCC	TCCC	TCCC	CCCC	TCCC
PotVar0004675	T	C	CCCC	CCCC	CCCC	CCCC	CCCC	CCCC	CCCC	CCCC	CCCC	CCCC	CCCC	CCCC	CCCC	CCCC	CCCC	CCCC	TTCC	CCCC	CCCC	CCCC	CCCC	CCCC	CCCC	CCCC	TTCC	TTCC	CCCC	CCCC	CCCC	TCCC	CCCC	CCCC	CCCC	TCCC	CCCC	TCCC	CCCC	CCCC	TTCC	TCCC	CCCC	CCCC	TCCC	CCCC	TCCC	CCCC	CCCC
PotVar0004680	T	C	----	----	----	----	----	----	----	----	----	----	----	----	----	----	----	----	----	----	----	----	----	----	----	----	----	----	----	----	----	----	----	----	----	----	----	----	----	----	----	----	----	----	----	----	----	----	----
PotVar0004710	T	C	----	----	----	----	----	----	----	----	----	----	----	----	----	----	----	----	----	----	----	----	----	----	----	----	----	----	----	----	----	----	----	----	----	----	----	----	----	----	----	----	----	----	----	----	----	----	----
PotVar0004719	T	C	CCCC	CCCC	TCCC	TCCC	TCCC	CCCC	CCCC	CCCC	TTCC	CCCC	TCCC	CCCC	TCCC	CCCC	CCCC	CCCC	TTCC	TCCC	TCCC	TCCC	CCCC	CCCC	TCCC	TCCC	TTCC	TTCC	CCCC	CCCC	TCCC	TTCC	CCCC	CCCC	TCCC	TCCC	CCCC	TCCC	CCCC	TCCC	TTCC	TCCC	TCCC	CCCC	CCCC	CCCC	TCCC	CCCC	TCCC
PotVar0004726	T	C	TCCC	TTTC	TTCC	TTCC	TTTT	TTCC	TCCC	TTCC	TTTC	TTCC	TTTC	TTCC	TTTC	TTTT	TTCC	TTTC	TTTC	TTTC	TTTC	TTTC	TTTC	TTCC	TTTC	TTTT	TTTT	TTTT	TTTT	TTTT	TTTT	TTCC	TCCC	TTTC	TTTC	TTTT	TTTT	TTCC	TTTC	TTCC	TTTT	TTTC	TTTT	TTTC	TTTC	TTTC	TTTC	TTCC	TTTT
PotVar0004727	A	C	----	----	----	----	----	----	----	----	----	----	----	----	----	----	----	----	----	----	----	----	----	----	----	----	----	----	----	----	----	----	----	----	----	----	----	----	----	----	----	----	----	----	----	----	----	----	----
PotVar0004730	A	G	----	----	----	----	----	----	----	----	----	----	----	----	----	----	----	----	----	----	----	----	----	----	----	----	----	----	----	----	----	----	----	----	----	----	----	----	----	----	----	----	----	----	----	----	----	----	----
PotVar0004772	A	G	GGGG	GGGG	GGGG	GGGG	GGGG	GGGG	GGGG	GGGG	GGGG	GGGG	GGGG	GGGG	GGGG	GGGG	GGGG	GGGG	GGGG	GGGG	GGGG	GGGG	GGGG	GGGG	GGGG	GGGG	GGGG	GGGG	GGGG	----	GGGG	GGGG	GGGG	GGGG	GGGG	GGGG	GGGG	GGGG	GGGG	GGGG	GGGG	GGGG	GGGG	GGGG	GGGG	GGGG	GGGG	GGGG	GGGG
PotVar0004787	T	G	----	----	----	----	----	----	----	----	----	----	----	----	----	----	----	----	----	----	----	----	----	----	----	----	----	----	----	----	----	----	----	----	----	----	----	----	----	----	----	----	----	----	----	----	----	----	----
PotVar0004789	T	C	TCCC	TTCC	TCCC	TCCC	TTCC	TCCC	CCCC	CCCC	TCCC	TTCC	CCCC	TCCC	TTCC	TCCC	TTCC	TTCC	TCCC	TTCC	TCCC	TCCC	TCCC	TTCC	TCCC	TTCC	TCCC	TCCC	TTTC	TTCC	TTTC	CCCC	TCCC	TTTC	TCCC	TCCC	TTTC	TCCC	TTCC	CCCC	TCCC	TCCC	TTCC	TTCC	TTTC	TTTC	CCCC	TTCC	TTTC
PotVar0004792	T	C	TCCC	TTCC	TTCC	TTCC	TTTC	TCCC	CCCC	CCCC	TTTC	TTCC	TCCC	TCCC	TTTC	TCCC	TTCC	TTCC	TTTC	TTTC	TTCC	TTTC	TCCC	TTCC	TTCC	TTTC	TTTC	TTTC	TTTC	TTCC	TTTT	TTCC	TTCC	TTTC	TTCC	TTTC	TTTC	TTCC	TTCC	TCCC	TTTC	TTCC	TTTC	TTCC	TTTC	TTTC	TCCC	TTCC	TTTT
PotVar0004795	A	G	GGGG	AGGG	GGGG	GGGG	GGGG	AGGG	AGGG	AAGG	GGGG	GGGG	AAGG	AGGG	GGGG	AAAG	GGGG	AGGG	GGGG	GGGG	AGGG	GGGG	AAGG	----	AGGG	AGGG	AGGG	AGGG	AGGG	AGGG	GGGG	GGGG	GGGG	GGGG	AGGG	AGGG	GGGG	GGGG	AGGG	AGGG	AGGG	AGGG	AGGG	AGGG	GGGG	GGGG	AAGG	GGGG	GGGG
PotVar0004816	A	C	CCCC	CCCC	CCCC	CCCC	CCCC	CCCC	ACCC	CCCC	CCCC	CCCC	ACCC	CCCC	CCCC	CCCC	CCCC	CCCC	CCCC	CCCC	CCCC	CCCC	CCCC	CCCC	CCCC	CCCC	CCCC	CCCC	CCCC	CCCC	CCCC	CCCC	CCCC	CCCC	CCCC	CCCC	CCCC	CCCC	CCCC	CCCC	ACCC	ACCC	CCCC	CCCC	CCCC	CCCC	CCCC	CCCC	CCCC
PotVar0004819	T	C	----	----	----	----	----	----	----	----	----	----	----	----	----	----	----	----	----	----	----	----	----	----	----	----	----	----	----	----	----	----	----	----	----	----	----	----	----	----	----	----	----	----	----	----	----	----	----
PotVar0004822	A	G	----	----	----	----	----	----	----	----	----	----	----	----	----	----	----	----	----	----	----	----	----	----	----	----	----	----	----	----	----	----	----	----	----	----	----	----	----	----	----	----	----	----	----	----	----	----	----
PotVar0004836	A	C	AAAA	AAAA	AAAA	AAAA	AAAA	AAAA	AAAA	AAAA	AAAA	AAAA	AAAA	AAAA	AAAA	AAAA	AAAA	AAAA	AAAA	AAAA	AAAA	AAAA	AAAA	AAAA	AAAA	AAAA	AAAA	AAAA	AAAA	AAAC	AAAA	AAAA	AAAC	AAAA	AAAA	AAAA	AAAA	AAAA	AAAA	AAAA	AAAC	AAAA	AAAA	AAAA	AAAC	AAAA	AAAA	AAAA	AAAA
PotVar0004858	T	C	TTTT	TTTT	TTTC	TTTC	TTTC	TTTC	TTTT	TTTT	TTCC	TTCC	TTTC	TTTT	TTTC	TTTT	TTTT	TTTT	TTTT	TTTC	TTTC	TTTC	TTTT	TTTT	TTTT	TTTC	TTTT	TTTT	TTTT	TTTC	TTTC	TTCC	TTTT	TTTT	TTTT	TTTT	TTTT	TTTT	TTTT	TTTC	TTTC	TTTT	TTTC	TTTT	TTTT	TTTT	TTTC	TTTT	TTTC
PotVar0004860	A	G	AAAA	AAAG	AAAG	AAAG	AAGG	AAGG	AAGG	AGGG	AAGG	AAGG	GGGG	AAAG	AAAG	AAGG	AAAA	AAAA	AAAA	AAAG	AAGG	AAGG	AAAG	AAAG	AAGG	AAAG	AAAA	AAAA	AAAA	AAAG	AAAG	AAGG	----	AAAA	AAGG	AAAG	AAAG	AAAA	AAAG	AAAG	GGGG	AAGG	AAGG	AAAG	AAAG	AAAA	AGGG	AAAA	AAAG
PotVar0004874	T	C	TTTT	TTTT	TTTT	TTTT	TTTT	TTTT	TTTT	TTTT	TTTT	TTTT	TTTT	TTTT	TTTT	TTTT	TTTT	TTTT	TTTT	TTTT	TTTT	TTTT	TTTT	TTTT	TTTT	TTTT	TTTT	TTTT	TTTT	TTTT	TTTT	TTTT	TTTC	TTTT	TTTT	TTTT	TTTT	TTTT	TTTT	TTTT	TTTC	TTTT	TTTT	TTTT	TTTC	TTTT	TTTT	TTTT	TTTT
PotVar0004885	T	C	TCCC	TTCC	CCCC	TCCC	TCCC	CCCC	TCCC	CCCC	TCCC	TCCC	TCCC	TCCC	TTCC	TCCC	TTCC	TTCC	TCCC	TCCC	TCCC	CCCC	TCCC	TCCC	TCCC	TTCC	TCCC	TCCC	TTTC	TCCC	TCCC	CCCC	TCCC	TTTC	TCCC	TCCC	TTCC	TCCC	CCCC	CCCC	TCCC	TCCC	TCCC	TCCC	TCCC	TTCC	CCCC	TTTC	TTTC
PotVar0004925	T	C	----	----	----	----	----	----	----	----	----	----	----	----	----	----	----	----	----	----	----	----	----	----	----	----	----	----	----	----	----	----	----	----	----	----	----	----	----	----	----	----	----	----	----	----	----	----	----
PotVar0004926	A	G	----	----	----	----	----	----	----	----	----	----	----	----	----	----	----	----	----	----	----	----	----	----	----	----	----	----	----	----	----	----	----	----	----	----	----	----	----	----	----	----	----	----	----	----	----	----	----
PotVar0004936	A	G	AAAA	AAAG	AAAG	AAAG	AAGG	AAGG	AAAG	AGGG	----	AAGG	AGGG	AAAG	AAAG	AAGG	AAAA	AAAA	AAAA	AAAG	AAGG	AAAG	AAAG	AAAG	AAGG	AAAA	AAAA	AAAA	AAAA	AAAG	AAGG	----	AAAA	AAAA	AAGG	AAAA	----	AAAA	AAAG	AAAG	AAGG	AAAG	AAGG	AAAG	AAAA	AAAA	AGGG	AAAA	AAAG
PotVar0004947	A	G	----	----	----	----	----	----	----	----	----	----	----	----	----	----	----	----	----	----	----	----	----	----	----	----	----	----	----	----	----	----	----	----	----	----	----	----	----	----	----	----	----	----	----	----	----	----	----
PotVar0004952	T	C	TCCC	TTTC	TCCC	TTCC	TTTC	TTCC	TTCC	TTTC	TTTC	TTTC	TTTT	TTCC	TTTC	TTTC	TTCC	TTCC	TCCC	TTCC	TTTC	----	TTCC	----	TTTC	TTCC	TCCC	TCCC	TTTC	TTTC	TTTC	TTCC	TTTC	TTTC	TTTC	----	TTTC	TCCC	TCCC	TCCC	TTTT	TTCC	TTTC	TTCC	TTCC	TTCC	TTTC	TTTC	TTTT
PotVar0004958	A	G	----	----	----	----	----	----	----	----	----	----	----	----	----	----	----	----	----	----	----	----	----	----	----	----	----	----	----	----	----	----	----	----	----	----	----	----	----	----	----	----	----	----	----	----	----	----	----
PotVar0005003	A	C	----	----	----	----	----	----	----	----	----	----	----	----	----	----	----	----	----	----	----	----	----	----	----	----	----	----	----	----	----	----	----	----	----	----	----	----	----	----	----	----	----	----	----	----	----	----	----
PotVar0005012	A	C	----	----	----	----	----	----	----	----	----	----	----	----	----	----	----	----	----	----	----	----	----	----	----	----	----	----	----	----	----	----	----	----	----	----	----	----	----	----	----	----	----	----	----	----	----	----	----
PotVar0005016	A	G	AGGG	AAGG	AGGG	AAAG	AAAG	AAGG	AAGG	AAGG	AAAA	AAAG	AAGG	AGGG	AAAG	AAGG	AAGG	----	AAGG	AAAG	AAGG	AAGG	AGGG	AAGG	AGGG	AAGG	GGGG	GGGG	AAAG	AAAG	AAGG	AAGG	----	AAAG	AGGG	AAAG	AAAG	GGGG	AAGG	AGGG	AAAG	AGGG	AAGG	AAGG	AAGG	AAGG	AGGG	AAAG	AAAA
PotVar0005019	T	C	----	----	----	----	----	----	----	----	----	----	----	----	----	----	----	----	----	----	----	----	----	----	----	----	----	----	----	----	----	----	----	----	----	----	----	----	----	----	----	----	----	----	----	----	----	----	----
PotVar0005020	T	C	----	----	----	----	----	----	----	----	----	----	----	----	----	----	----	----	----	----	----	----	----	----	----	----	----	----	----	----	----	----	----	----	----	----	----	----	----	----	----	----	----	----	----	----	----	----	----
PotVar0005060	A	G	----	----	----	----	----	----	----	----	----	----	----	----	----	----	----	----	----	----	----	----	----	----	----	----	----	----	----	----	----	----	----	----	----	----	----	----	----	----	----	----	----	----	----	----	----	----	----
PotVar0005070	A	G	----	----	----	----	----	----	----	----	----	----	----	----	----	----	----	----	----	----	----	----	----	----	----	----	----	----	----	----	----	----	----	----	----	----	----	----	----	----	----	----	----	----	----	----	----	----	----
PotVar0005097	T	C	----	----	----	----	----	----	----	----	----	----	----	----	----	----	----	----	----	----	----	----	----	----	----	----	----	----	----	----	----	----	----	----	----	----	----	----	----	----	----	----	----	----	----	----	----	----	----
PotVar0005102	T	C	CCCC	CCCC	TCCC	CCCC	TCCC	TCCC	CCCC	TCCC	CCCC	TCCC	TCCC	CCCC	CCCC	CCCC	TCCC	CCCC	CCCC	CCCC	TCCC	TCCC	CCCC	TCCC	TCCC	CCCC	TCCC	TCCC	CCCC	CCCC	TTCC	CCCC	CCCC	CCCC	TCCC	CCCC	TCCC	CCCC	TTCC	CCCC	CCCC	TCCC	TCCC	TCCC	TCCC	TCCC	CCCC	CCCC	CCCC
PotVar0005103	T	G	----	----	----	----	----	----	----	----	----	----	----	----	----	----	----	----	----	----	----	----	----	----	----	----	----	----	----	----	----	----	----	----	----	----	----	----	----	----	----	----	----	----	----	----	----	----	----
PotVar0005108	A	G	----	----	----	----	----	----	----	----	----	----	----	----	----	----	----	----	----	----	----	----	----	----	----	----	----	----	----	----	----	----	----	----	----	----	----	----	----	----	----	----	----	----	----	----	----	----	----
PotVar0005134	T	C	CCCC	CCCC	TCCC	TCCC	TTCC	TTCC	TCCC	CCCC	TTTC	TTCC	TTCC	CCCC	TCCC	TCCC	TCCC	CCCC	TCCC	TTCC	TCCC	TCCC	CCCC	CCCC	CCCC	CCCC	CCCC	CCCC	CCCC	TCCC	TCCC	TTCC	CCCC	CCCC	CCCC	CCCC	TCCC	CCCC	CCCC	TCCC	TTTC	TCCC	TCCC	TCCC	TCCC	TCCC	TCCC	CCCC	TCCC
PotVar0005149	A	G	AGGG	AAAG	AAGG	AAAG	AAAA	AAAA	AAAG	AAAA	AAAA	AAAA	AAAA	AAGG	AAAG	AAGG	AAAG	AAGG	AAGG	AAAA	AAAG	AAAG	AAGG	AAAG	AAAG	AAGG	AGGG	AGGG	AAAG	AAAA	AAAA	AAGG	AAGG	AAAG	AAAG	AAAG	AAAA	GGGG	AAAA	AGGG	AAAA	AAGG	AAAA	AAAG	AAAG	AAAG	AAAG	AAAG	AAAA
PotVar0005165	T	C	----	----	----	----	----	----	----	----	----	----	----	----	----	----	----	----	----	----	----	----	----	----	----	----	----	----	----	----	----	----	----	----	----	----	----	----	----	----	----	----	----	----	----	----	----	----	----
PotVar0005213	T	C	----	----	----	----	----	----	----	----	----	----	----	----	----	----	----	----	----	----	----	----	----	----	----	----	----	----	----	----	----	----	----	----	----	----	----	----	----	----	----	----	----	----	----	----	----	----	----
PotVar0005221	T	C	TTTT	TTTT	TTTT	TTTT	TTTT	TTTT	TTTT	TTTT	TTTT	TTTT	TTTC	TTTT	TTTT	TTTT	TTTT	TTTT	TTTT	TTTT	TTTT	TTTT	TTTT	TTTT	TTTT	TTTT	TTTT	TTTT	TTTT	TTTT	TTTT	TTTT	TTTT	TTTT	TTTT	TTTT	TTTT	TTTT	TTTT	TTTT	----	TTTT	TTTT	TTTT	TTTT	TTTT	TTTT	TTTT	TTTT
PotVar0005243	A	G	AAAA	AAAA	AAAA	AAAA	AAAG	AAAA	AAAA	AAAA	AAAA	AAAA	AAAA	AAAA	AAAA	AAAA	AAAA	AAAA	AAAA	AAAA	AAAA	AAAA	AAAA	AAAA	AAAA	AAAA	AAAA	AAAA	AAAA	AAAA	AAAA	AAAA	AAAA	AAAA	AAAA	AAAA	AAAG	AAAA	AAAA	AAAA	AAAA	AAAA	AAAA	AAAA	AAAA	AAAA	AAAA	AAAA	AAAA
PotVar0005256	T	G	----	----	----	----	----	----	----	----	----	----	----	----	----	----	----	----	----	----	----	----	----	----	----	----	----	----	----	----	----	----	----	----	----	----	----	----	----	----	----	----	----	----	----	----	----	----	----
PotVar0005291	T	C	CCCC	CCCC	TCCC	CCCC	TCCC	TCCC	CCCC	TCCC	CCCC	TCCC	CCCC	CCCC	CCCC	CCCC	TCCC	CCCC	CCCC	CCCC	CCCC	TCCC	CCCC	TCCC	CCCC	CCCC	TCCC	TCCC	CCCC	CCCC	TCCC	CCCC	CCCC	CCCC	CCCC	CCCC	TCCC	CCCC	TCCC	CCCC	CCCC	TCCC	TCCC	CCCC	TCCC	TCCC	CCCC	CCCC	CCCC
PotVar0005335	T	C	CCCC	CCCC	CCCC	CCCC	CCCC	CCCC	CCCC	CCCC	CCCC	CCCC	CCCC	CCCC	CCCC	CCCC	CCCC	CCCC	CCCC	CCCC	CCCC	CCCC	CCCC	CCCC	CCCC	CCCC	CCCC	CCCC	CCCC	CCCC	CCCC	CCCC	CCCC	CCCC	CCCC	CCCC	CCCC	CCCC	CCCC	CCCC	CCCC	CCCC	CCCC	CCCC	CCCC	CCCC	CCCC	CCCC	CCCC
PotVar0005344	A	G	AAAA	AAAA	AAAA	AAAA	AAAA	AAAA	AAAA	AAAA	AAAA	AAAA	AAAA	AAAA	AAAA	AAAA	AAAA	AAAA	AAAA	AAAA	AAAA	AAAA	AAAA	AAAA	AAAA	AAAA	AAAA	AAAA	AAAA	AAAA	AAAA	AAAA	AAAA	AAAA	AAAA	AAAA	AAAA	AAAA	AAAA	AAAA	AAAA	AAAA	AAAA	AAAA	AAAG	AAAA	AAAA	AAAA	AAAA
PotVar0005442	T	C	CCCC	CCCC	CCCC	CCCC	CCCC	CCCC	CCCC	CCCC	CCCC	CCCC	CCCC	CCCC	CCCC	CCCC	CCCC	CCCC	CCCC	CCCC	CCCC	CCCC	CCCC	CCCC	CCCC	CCCC	CCCC	CCCC	CCCC	CCCC	CCCC	CCCC	CCCC	CCCC	CCCC	CCCC	CCCC	CCCC	CCCC	CCCC	CCCC	CCCC	CCCC	CCCC	CCCC	CCCC	CCCC	CCCC	CCCC
PotVar0005449	A	C	ACCC	AAAC	ACCC	AACC	AAAC	AACC	AACC	AAAA	ACCC	AACC	AACC	AAAC	AACC	ACCC	AACC	AACC	AACC	AAAC	AACC	AACC	AACC	AAAC	AAAC	AACC	ACCC	ACCC	AAAC	AAAC	AAAC	CCCC	ACCC	AAAC	AAAC	AACC	AAAA	CCCC	AAAA	ACCC	AAAC	AAAC	AAAC	ACCC	AAAC	AAAA	AACC	----	AACC
PotVar0005450	A	G	----	----	----	----	----	----	----	----	----	----	----	----	----	----	----	----	----	----	----	----	----	----	----	----	----	----	----	----	----	----	----	----	----	----	----	----	----	----	----	----	----	----	----	----	----	----	----
PotVar0005465	A	G	----	----	----	----	----	----	----	----	----	----	----	----	----	----	----	----	----	----	----	----	----	----	----	----	----	----	----	----	----	----	----	----	----	----	----	----	----	----	----	----	----	----	----	----	----	----	----
PotVar0005531	A	G	GGGG	GGGG	GGGG	GGGG	AGGG	GGGG	GGGG	GGGG	GGGG	GGGG	GGGG	GGGG	GGGG	GGGG	GGGG	GGGG	GGGG	GGGG	GGGG	GGGG	GGGG	GGGG	GGGG	GGGG	GGGG	GGGG	GGGG	GGGG	GGGG	GGGG	GGGG	GGGG	GGGG	GGGG	AGGG	GGGG	GGGG	GGGG	GGGG	GGGG	GGGG	GGGG	GGGG	GGGG	GGGG	GGGG	GGGG
PotVar0005543	A	G	----	----	----	----	----	----	----	----	----	----	----	----	----	----	----	----	----	----	----	----	----	----	----	----	----	----	----	----	----	----	----	----	----	----	----	----	----	----	----	----	----	----	----	----	----	----	----
PotVar0005549	T	C	----	----	----	----	----	----	----	----	----	----	----	----	----	----	----	----	----	----	----	----	----	----	----	----	----	----	----	----	----	----	----	----	----	----	----	----	----	----	----	----	----	----	----	----	----	----	----
PotVar0005576	A	C	AAAA	AAAA	AAAA	AAAA	AAAA	AAAA	AAAA	AAAA	AAAA	AAAA	AAAC	AAAA	AAAA	AAAA	AAAA	AAAA	AAAA	AAAA	AAAC	AAAA	AAAA	AAAA	AAAC	AAAA	AAAA	AAAA	AAAA	AAAA	AAAA	AAAA	AAAA	AAAA	AAAC	AAAA	AAAA	AAAA	AAAA	AAAA	AAAA	AAAA	AAAA	AAAC	AAAA	AAAA	AAAA	AAAA	AAAA
PotVar0005589	A	G	AAAA	AAAA	AAAA	AAAA	AAAA	AAAA	AAAA	AAAA	AAAA	AAAA	AAAA	AAAG	AAAA	AAAA	AAAA	AAAA	AAAA	AAAA	AAAA	AAAG	AAAA	AAAA	AAAA	AAAA	AAAA	AAAA	AAAA	----	AAAA	AAAA	AAAA	AAAA	AAAA	AAAA	AAAA	AAAA	AAAA	AAAA	AAAA	AAAA	AAAA	AAAA	AAAA	AAAG	AAAA	AAAA	AAAA
PotVar0005590	T	C	TCCC	TTTC	TCCC	TTCC	TTTC	TTCC	TTCC	TTTT	TCCC	TTCC	TTCC	TTTC	TTCC	TCCC	TTCC	TTCC	TTCC	TTTC	TTCC	TTTC	TTCC	TTTC	TTTC	TTCC	TCCC	TCCC	TTTC	TTTC	TTTC	CCCC	TCCC	TTTC	TTTC	TTTC	TTTT	CCCC	TTTT	TCCC	TTTC	TTTC	TTTC	TCCC	TTTC	TTTT	TTCC	TTTC	TTCC
PotVar0005597	A	G	GGGG	GGGG	GGGG	GGGG	AGGG	GGGG	GGGG	GGGG	GGGG	GGGG	AGGG	GGGG	GGGG	GGGG	GGGG	GGGG	GGGG	GGGG	AGGG	GGGG	GGGG	GGGG	AGGG	GGGG	GGGG	GGGG	GGGG	GGGG	GGGG	GGGG	GGGG	GGGG	AGGG	GGGG	AGGG	GGGG	GGGG	GGGG	GGGG	GGGG	GGGG	AGGG	AGGG	GGGG	GGGG	GGGG	GGGG
PotVar0005603	T	C	TTTC	TTCC	TTCC	TTCC	TTCC	TTTC	TTCC	TTTC	TTTC	TTCC	TTTT	TTCC	TTCC	TTTC	TTTC	TTTC	TTTC	TTTT	TTTT	TTTC	TTTC	TCCC	TTTC	TCCC	TTTC	TTTC	TCCC	TCCC	TTCC	TTTT	TTCC	TTCC	TTTC	TTTC	TCCC	TTTC	TCCC	TTCC	TTCC	TTCC	TTCC	TTTT	TTCC	TTCC	TTTC	TTTC	TTTC
PotVar0005609	A	C	CCCC	CCCC	CCCC	CCCC	CCCC	CCCC	CCCC	CCCC	CCCC	CCCC	CCCC	CCCC	CCCC	CCCC	CCCC	CCCC	CCCC	CCCC	CCCC	CCCC	CCCC	CCCC	CCCC	CCCC	CCCC	CCCC	CCCC	CCCC	CCCC	CCCC	CCCC	CCCC	CCCC	CCCC	CCCC	CCCC	CCCC	CCCC	CCCC	CCCC	CCCC	CCCC	CCCC	CCCC	CCCC	CCCC	CCCC
PotVar0005610	T	C	TCCC	TTTC	TTCC	TTCC	TTCC	TTCC	TTTC	TTTT	TCCC	TTCC	TTCC	TTCC	TTCC	TCCC	TCCC	TTCC	TCCC	TTCC	----	TTCC	TTCC	TTTC	TTTC	TTTC	TCCC	TCCC	TTTC	TTTC	TTTC	CCCC	TTTC	TTTC	TTTC	TTTC	TTTC	TCCC	TTTT	TTCC	TTTC	TTTC	TTTC	TCCC	TTCC	TTCC	TCCC	TTTC	TTCC
PotVar0005644	T	C	CCCC	TCCC	CCCC	CCCC	CCCC	TCCC	TCCC	TTTC	CCCC	CCCC	TCCC	CCCC	CCCC	CCCC	CCCC	TCCC	CCCC	TTCC	CCCC	CCCC	TCCC	CCCC	TCCC	CCCC	CCCC	CCCC	CCCC	CCCC	TCCC	CCCC	CCCC	TCCC	TCCC	TCCC	CCCC	CCCC	TCCC	CCCC	TCCC	TCCC	TCCC	CCCC	CCCC	CCCC	CCCC	TTCC	TCCC
PotVar0005654	A	G	----	----	----	----	----	----	----	----	----	----	----	----	----	----	----	----	----	----	----	----	----	----	----	----	----	----	----	----	----	----	----	----	----	----	----	----	----	----	----	----	----	----	----	----	----	----	----
PotVar0005660	A	G	GGGG	GGGG	GGGG	GGGG	GGGG	GGGG	GGGG	GGGG	GGGG	GGGG	GGGG	GGGG	GGGG	GGGG	GGGG	GGGG	GGGG	GGGG	GGGG	GGGG	GGGG	GGGG	GGGG	GGGG	GGGG	GGGG	GGGG	GGGG	GGGG	GGGG	GGGG	GGGG	GGGG	GGGG	GGGG	GGGG	GGGG	GGGG	GGGG	GGGG	GGGG	GGGG	GGGG	GGGG	GGGG	GGGG	GGGG
PotVar0005662	A	G	AAAA	AAAG	AAAA	AAAA	AAAA	AAAG	AAAG	AGGG	AAAG	AAAA	AAAG	AAAG	AAAA	AAAA	AAAA	AAAG	AAAA	AAGG	AAAA	AAAA	AAAG	AAAG	AAAG	AAAA	AAAA	AAAA	AAAA	AAAG	AAAG	AAAA	AAAA	AAAG	AAAG	AAAG	AAAA	AAAA	AAAG	AAAA	AAAG	AAAG	AAAG	AAAA	AAAG	AAAA	AAAA	AGGG	AAAG
PotVar0005666	A	G	----	----	----	----	----	----	----	----	----	----	----	----	----	----	----	----	----	----	----	----	----	----	----	----	----	----	----	----	----	----	----	----	----	----	----	----	----	----	----	----	----	----	----	----	----	----	----
PotVar0005668	T	C	CCCC	CCCC	CCCC	CCCC	CCCC	CCCC	CCCC	CCCC	TCCC	CCCC	CCCC	TCCC	CCCC	CCCC	CCCC	CCCC	CCCC	CCCC	CCCC	CCCC	CCCC	CCCC	CCCC	CCCC	CCCC	CCCC	CCCC	TCCC	CCCC	CCCC	CCCC	CCCC	CCCC	CCCC	CCCC	CCCC	CCCC	CCCC	CCCC	CCCC	CCCC	CCCC	TCCC	CCCC	CCCC	TCCC	CCCC
PotVar0005671	A	G	----	----	----	----	----	----	----	----	----	----	----	----	----	----	----	----	----	----	----	----	----	----	----	----	----	----	----	----	----	----	----	----	----	----	----	----	----	----	----	----	----	----	----	----	----	----	----
PotVar0005672	T	C	TCCC	TTCC	TCCC	TTCC	TCCC	CCCC	TTCC	CCCC	CCCC	TCCC	CCCC	TCCC	TTCC	TCCC	CCCC	TCCC	TCCC	CCCC	CCCC	CCCC	TCCC	TTCC	TCCC	TTTC	CCCC	CCCC	TTTC	TTCC	TCCC	CCCC	TCCC	TTCC	TCCC	TCCC	TTCC	TCCC	TCCC	TTCC	CCCC	TCCC	TCCC	CCCC	CCCC	TCCC	TCCC	CCCC	TCCC
PotVar0005673	A	G	----	----	----	----	----	----	----	----	----	----	----	----	----	----	----	----	----	----	----	----	----	----	----	----	----	----	----	----	----	----	----	----	----	----	----	----	----	----	----	----	----	----	----	----	----	----	----
PotVar0005681	T	C	TTTT	TTTT	TTTT	TTTT	TTTT	TTTT	TTTT	TTTT	TTTT	TTTT	TTTT	TTTC	TTTT	TTTT	TTTT	TTTT	TTTT	TTTT	TTTT	TTTC	TTTT	TTTT	TTTT	TTTT	TTTT	TTTT	TTTT	TTTC	TTTT	TTTT	TTTT	TTTT	TTTT	TTTT	TTTT	TTTT	TTTT	TTTT	TTTT	TTTT	TTTT	TTTT	TTTT	TTTC	TTTC	TTTT	TTTT
PotVar0005682	T	C	CCCC	CCCC	CCCC	CCCC	CCCC	CCCC	CCCC	CCCC	CCCC	CCCC	CCCC	CCCC	CCCC	CCCC	CCCC	CCCC	CCCC	CCCC	CCCC	CCCC	CCCC	CCCC	CCCC	CCCC	CCCC	CCCC	CCCC	CCCC	CCCC	CCCC	CCCC	CCCC	CCCC	CCCC	CCCC	CCCC	CCCC	CCCC	CCCC	CCCC	CCCC	CCCC	CCCC	CCCC	CCCC	CCCC	CCCC
PotVar0005683	T	G	TTTT	TTTT	TTTG	TTTT	TTTG	TTTG	TTTT	TTTG	TTTT	TTTG	TTTT	TTTT	TTTT	TTTT	TTTG	TTTT	TTTT	TTTT	TTTT	TTTG	TTTT	TTTG	TTTT	TTTT	TTTG	TTTG	TTTT	TTTG	TTTG	TTTT	TTTG	TTTT	TTTT	TTTT	TTGG	TTTT	TTGG	TTTT	TTGG	TTTG	TTTG	TTTT	TTTG	TTTG	TTTT	TTTT	TTTT
PotVar0005685	A	G	GGGG	GGGG	GGGG	GGGG	GGGG	GGGG	GGGG	GGGG	GGGG	GGGG	GGGG	GGGG	GGGG	GGGG	GGGG	GGGG	GGGG	GGGG	GGGG	GGGG	GGGG	GGGG	GGGG	GGGG	GGGG	GGGG	GGGG	GGGG	GGGG	GGGG	GGGG	GGGG	GGGG	GGGG	GGGG	GGGG	GGGG	GGGG	GGGG	GGGG	GGGG	GGGG	GGGG	GGGG	GGGG	GGGG	GGGG
PotVar0005695	T	C	TTTT	TTTT	TTTT	TTTT	TTTC	TTTT	TTTT	TTTT	TTTT	TTTT	TTTC	TTTC	TTTT	TTTT	TTTT	TTTT	TTTT	TTTT	TTCC	TTTC	TTTT	TTTT	TTTC	TTTT	TTTT	TTTT	TTTT	----	TTTT	TTTT	TTTT	TTTT	TTTC	TTTT	TTCC	TTTT	TTTT	TTTT	TTTT	TTTT	TTTT	TTTC	TTTC	TTTC	TTTC	TTTT	TTTT
PotVar0005707	A	G	AGGG	AAGG	AAGG	AAGG	AAGG	AGGG	AAGG	AGGG	GGGG	AAGG	GGGG	AGGG	AAGG	AGGG	AGGG	AGGG	AGGG	GGGG	GGGG	AGGG	AGGG	AAAG	AGGG	AAAG	AGGG	AGGG	AAAG	AAGG	AAGG	GGGG	----	AAGG	AGGG	AGGG	AAAG	AGGG	AAAG	AAGG	AAGG	AAGG	AAGG	GGGG	AGGG	AAGG	AGGG	GGGG	AGGG
PotVar0005748	T	C	CCCC	CCCC	CCCC	CCCC	CCCC	CCCC	TCCC	TCCC	CCCC	TCCC	TCCC	CCCC	TCCC	TCCC	TTCC	CCCC	CCCC	TCCC	TCCC	CCCC	CCCC	CCCC	CCCC	CCCC	TCCC	TCCC	CCCC	TCCC	CCCC	TTCC	CCCC	CCCC	CCCC	CCCC	CCCC	CCCC	TCCC	CCCC	TTCC	CCCC	CCCC	CCCC	CCCC	CCCC	CCCC	----	CCCC
PotVar0005803	T	C	----	----	----	----	----	----	----	----	----	----	----	----	----	----	----	----	----	----	----	----	----	----	----	----	----	----	----	----	----	----	----	----	----	----	----	----	----	----	----	----	----	----	----	----	----	----	----
PotVar0005807	A	G	GGGG	GGGG	GGGG	GGGG	GGGG	AGGG	GGGG	GGGG	GGGG	AGGG	GGGG	GGGG	GGGG	GGGG	GGGG	GGGG	AGGG	AGGG	GGGG	GGGG	GGGG	GGGG	GGGG	GGGG	GGGG	GGGG	GGGG	GGGG	GGGG	GGGG	AGGG	GGGG	GGGG	GGGG	GGGG	GGGG	GGGG	GGGG	GGGG	GGGG	GGGG	AGGG	AGGG	GGGG	GGGG	AGGG	AAGG
PotVar0005816	T	C	CCCC	CCCC	CCCC	CCCC	CCCC	CCCC	TCCC	TCCC	CCCC	TCCC	TCCC	CCCC	TCCC	TCCC	TTCC	CCCC	CCCC	TCCC	TCCC	CCCC	CCCC	CCCC	CCCC	CCCC	TCCC	TCCC	CCCC	TCCC	CCCC	TTCC	CCCC	CCCC	CCCC	CCCC	CCCC	CCCC	TCCC	CCCC	TTCC	CCCC	CCCC	CCCC	CCCC	CCCC	CCCC	CCCC	CCCC
PotVar0005817	T	C	----	----	----	----	----	----	----	----	----	----	----	----	----	----	----	----	----	----	----	----	----	----	----	----	----	----	----	----	----	----	----	----	----	----	----	----	----	----	----	----	----	----	----	----	----	----	----
PotVar0005840	T	G	----	----	----	----	----	----	----	----	----	----	----	----	----	----	----	----	----	----	----	----	----	----	----	----	----	----	----	----	----	----	----	----	----	----	----	----	----	----	----	----	----	----	----	----	----	----	----
PotVar0005841	A	G	AAAA	AAAG	AAAG	AGGG	AGGG	AAAG	AAAG	AAAG	AAGG	AAGG	AAAG	AAGG	AGGG	AAGG	AAAA	AAAA	AAAG	AAAG	AGGG	AAGG	AAAG	AAGG	AAAG	AAAG	AAAG	AAAG	AAAG	AAAG	AAAG	AAAG	AAAA	AAAG	AAAG	AAAG	AAGG	AAAA	AAGG	AAAG	AAAA	AAGG	AAGG	AAAG	AGGG	AAAG	AAGG	AAAA	AAAG
PotVar0005842	A	G	GGGG	GGGG	GGGG	GGGG	AGGG	GGGG	GGGG	GGGG	GGGG	GGGG	GGGG	GGGG	GGGG	GGGG	GGGG	GGGG	GGGG	GGGG	GGGG	GGGG	GGGG	GGGG	GGGG	GGGG	GGGG	GGGG	GGGG	GGGG	GGGG	GGGG	GGGG	GGGG	GGGG	GGGG	GGGG	GGGG	GGGG	GGGG	GGGG	GGGG	GGGG	GGGG	GGGG	GGGG	GGGG	GGGG	GGGG
PotVar0005859	T	C	----	----	----	----	----	----	----	----	----	----	----	----	----	----	----	----	----	----	----	----	----	----	----	----	----	----	----	----	----	----	----	----	----	----	----	----	----	----	----	----	----	----	----	----	----	----	----
PotVar0005861	T	C	CCCC	CCCC	CCCC	CCCC	CCCC	TCCC	CCCC	CCCC	CCCC	TCCC	CCCC	CCCC	CCCC	CCCC	CCCC	CCCC	TCCC	TCCC	CCCC	CCCC	CCCC	CCCC	TCCC	CCCC	CCCC	CCCC	CCCC	CCCC	CCCC	CCCC	TCCC	CCCC	TCCC	CCCC	CCCC	TCCC	CCCC	CCCC	CCCC	CCCC	CCCC	TCCC	TCCC	CCCC	CCCC	TCCC	TTCC
PotVar0005887	A	G	----	----	----	----	----	----	----	----	----	----	----	----	----	----	----	----	----	----	----	----	----	----	----	----	----	----	----	----	----	----	----	----	----	----	----	----	----	----	----	----	----	----	----	----	----	----	----
PotVar0005888	T	G	TTTT	TTTT	TTTT	TTTT	TTTG	TTTT	TTTT	TTTT	TTTT	TTTT	TTTT	TTTT	TTTT	TTTT	TTTT	TTTT	TTTT	TTTT	TTTT	TTTT	TTTT	TTTT	TTTT	TTTT	TTTT	TTTT	TTTT	TTTT	TTTT	TTTT	TTTT	TTTT	TTTT	TTTT	TTTT	TTTT	TTTT	TTTT	TTTT	TTTT	TTTT	TTTT	TTTT	TTTT	TTTT	TTTT	TTTT
PotVar0005899	A	G	GGGG	AGGG	AGGG	AAAG	AAAG	AAGG	AAGG	AAGG	AAGG	AAAA	AAGG	AAGG	AAAA	AAAG	AAGG	GGGG	AAGG	AAAG	AAAA	AAGG	AGGG	AAGG	AAGG	AGGG	AAGG	AAGG	AGGG	AAGG	AGGG	AAAG	AGGG	AGGG	AAGG	AGGG	AAGG	AGGG	AAAG	AGGG	AAGG	AAGG	AAGG	AAGG	AAAA	AGGG	AAGG	AGGG	AAAG
PotVar0005918	T	C	CCCC	CCCC	CCCC	CCCC	CCCC	CCCC	CCCC	CCCC	CCCC	CCCC	CCCC	CCCC	CCCC	CCCC	CCCC	CCCC	CCCC	CCCC	CCCC	CCCC	CCCC	CCCC	CCCC	CCCC	CCCC	CCCC	CCCC	CCCC	CCCC	CCCC	CCCC	CCCC	CCCC	CCCC	CCCC	CCCC	CCCC	CCCC	CCCC	CCCC	CCCC	CCCC	CCCC	CCCC	CCCC	CCCC	CCCC
PotVar0005919	A	G	AAAA	AAAA	AAAG	AAAA	AAAA	AAAG	AAAA	AAAA	AAAA	AAAA	AAAA	AAAA	AAAA	AAAA	AAAA	AAAA	AAAA	AAAA	AAAA	AAAA	AAAA	AAAA	AAAA	AAAA	AAAA	AAAA	AAAA	AAAA	AAAA	AAAA	AAAA	AAAG	AAAA	AAAA	AAAA	AAAA	AAAA	AAAA	AAAA	AAAA	AAAA	AAAA	AAAA	AAAA	AAAA	AAAA	AAAG
PotVar0005924	T	G	----	----	----	----	----	----	----	----	----	----	----	----	----	----	----	----	----	----	----	----	----	----	----	----	----	----	----	----	----	----	----	----	----	----	----	----	----	----	----	----	----	----	----	----	----	----	----
PotVar0005964	T	C	CCCC	TCCC	CCCC	CCCC	TCCC	CCCC	CCCC	CCCC	CCCC	CCCC	TCCC	CCCC	CCCC	CCCC	CCCC	CCCC	CCCC	CCCC	CCCC	CCCC	TCCC	CCCC	CCCC	CCCC	CCCC	CCCC	TCCC	TCCC	CCCC	CCCC	CCCC	CCCC	CCCC	CCCC	CCCC	CCCC	CCCC	TCCC	CCCC	TCCC	CCCC	CCCC	CCCC	CCCC	CCCC	TCCC	CCCC
PotVar0005994	T	G	TTTT	TTTG	TTTT	TTGG	TTTG	TTTG	TTTT	TTTT	TTTG	TTTG	TTTT	TGGG	TTTG	TTTG	TTTG	TTGG	TTTG	TTTT	TTGG	TTGG	TTGG	TTTG	TTTG	TTGG	TTTG	TTTG	TTTG	----	TTTG	TTTG	TTTT	TTTG	TTTG	TGGG	TTGG	TTTG	TTTG	TTTG	TTTG	TTTT	TTTG	TTTG	TTTG	TTTG	TTGG	TTTG	TTTT
PotVar0005998	A	G	----	----	----	----	----	----	----	----	----	----	----	----	----	----	----	----	----	----	----	----	----	----	----	----	----	----	----	----	----	----	----	----	----	----	----	----	----	----	----	----	----	----	----	----	----	----	----
PotVar0005999	A	G	----	----	----	----	----	----	----	----	----	----	----	----	----	----	----	----	----	----	----	----	----	----	----	----	----	----	----	----	----	----	----	----	----	----	----	----	----	----	----	----	----	----	----	----	----	----	----
PotVar0006050	T	C	TTCC	TTTC	TTTT	TTTT	TTTC	TTTC	TTTT	TTTT	TTTC	TTTC	TTTC	TTTT	TTCC	TTTT	TTTC	TTTC	TTCC	TTCC	TTTC	TTTC	TTCC	TTTT	TTTT	TTTC	TCCC	TCCC	TTCC	TTTC	TTCC	TTTC	TCCC	TTCC	TTTT	TTTC	TTTC	TTCC	TTTT	TTCC	TTTT	TTTC	TTTT	TTTT	TTTC	TTTC	TTTC	TCCC	TTTC
PotVar0006051	A	C	----	----	----	----	----	----	----	----	----	----	----	----	----	----	----	----	----	----	----	----	----	----	----	----	----	----	----	----	----	----	----	----	----	----	----	----	----	----	----	----	----	----	----	----	----	----	----
PotVar0006074	T	C	----	----	----	----	----	----	----	----	----	----	----	----	----	----	----	----	----	----	----	----	----	----	----	----	----	----	----	----	----	----	----	----	----	----	----	----	----	----	----	----	----	----	----	----	----	----	----
PotVar0006082	T	C	TTCC	TCCC	CCCC	CCCC	CCCC	CCCC	CCCC	CCCC	CCCC	CCCC	CCCC	CCCC	CCCC	CCCC	CCCC	TCCC	CCCC	CCCC	CCCC	CCCC	CCCC	CCCC	CCCC	CCCC	CCCC	CCCC	TCCC	TCCC	CCCC	CCCC	TCCC	TCCC	CCCC	CCCC	CCCC	TCCC	CCCC	CCCC	CCCC	CCCC	CCCC	CCCC	TCCC	CCCC	CCCC	TCCC	CCCC
PotVar0006104	T	C	TCCC	CCCC	TTCC	CCCC	CCCC	CCCC	TTCC	TTTC	TCCC	CCCC	TCCC	CCCC	TCCC	CCCC	CCCC	TCCC	TTCC	TTCC	CCCC	CCCC	CCCC	TCCC	TTCC	TCCC	CCCC	CCCC	CCCC	TCCC	CCCC	TCCC	CCCC	CCCC	TTCC	CCCC	CCCC	TCCC	CCCC	CCCC	TTTC	TCCC	TCCC	CCCC	CCCC	TCCC	CCCC	CCCC	TCCC
PotVar0006105	A	C	CCCC	ACCC	CCCC	CCCC	ACCC	CCCC	CCCC	CCCC	CCCC	CCCC	CCCC	CCCC	CCCC	CCCC	CCCC	CCCC	CCCC	CCCC	CCCC	CCCC	CCCC	CCCC	CCCC	CCCC	CCCC	CCCC	CCCC	CCCC	CCCC	CCCC	CCCC	CCCC	CCCC	CCCC	CCCC	CCCC	CCCC	CCCC	CCCC	ACCC	CCCC	CCCC	CCCC	CCCC	CCCC	CCCC	CCCC
PotVar0006106	A	G	GGGG	AGGG	GGGG	AAGG	AAGG	AAGG	GGGG	GGGG	AAGG	AAGG	AGGG	----	AAAG	AGGG	AAGG	AAGG	AAGG	AAGG	AAAG	AAAG	AAAA	AGGG	AGGG	AGGG	AAAA	AAAA	AAGG	AGGG	AAAA	AAGG	AAGG	AAGG	AGGG	AAAA	AAGG	----	AGGG	AAAG	AGGG	AGGG	AGGG	AAGG	AGGG	AAGG	AAAG	AAAG	AGGG
PotVar0006118	T	C	----	----	----	----	----	----	----	----	----	----	----	----	----	----	----	----	----	----	----	----	----	----	----	----	----	----	----	----	----	----	----	----	----	----	----	----	----	----	----	----	----	----	----	----	----	----	----
PotVar0006125	T	C	CCCC	TCCC	CCCC	TTCC	TCCC	CCCC	CCCC	CCCC	CCCC	CCCC	CCCC	TTCC	TCCC	CCCC	CCCC	TCCC	CCCC	CCCC	TTCC	TTCC	TCCC	TCCC	TCCC	CCCC	TCCC	TCCC	CCCC	TCCC	TCCC	CCCC	CCCC	CCCC	TCCC	TTCC	TTTC	CCCC	TCCC	CCCC	CCCC	CCCC	TCCC	CCCC	TCCC	TCCC	CCCC	TCCC	CCCC
PotVar0006140	A	G	AAGG	AAAG	AGGG	AAGG	AAAG	AAAG	GGGG	GGGG	AAGG	AAGG	AGGG	AAAG	AAAG	AGGG	AAGG	AAAG	AAGG	AAGG	AAAG	AAAG	AAAA	AGGG	AGGG	AAGG	AAAA	AAAA	AAAG	AAGG	AAAA	AAGG	AAAG	AAAA	AGGG	AAAA	AAAG	AAGG	AGGG	AAAG	AGGG	AAGG	AGGG	AAGG	AAGG	AAGG	AAAG	AAAA	AAGG
PotVar0006142	A	G	GGGG	GGGG	GGGG	GGGG	GGGG	GGGG	GGGG	GGGG	AGGG	AGGG	GGGG	AGGG	GGGG	AGGG	AGGG	AGGG	GGGG	GGGG	GGGG	GGGG	AGGG	GGGG	GGGG	AGGG	GGGG	GGGG	AGGG	GGGG	GGGG	AGGG	GGGG	AGGG	GGGG	GGGG	GGGG	GGGG	GGGG	GGGG	AGGG	GGGG	GGGG	AAGG	GGGG	GGGG	AGGG	AGGG	GGGG
PotVar0006158	A	G	GGGG	AGGG	GGGG	GGGG	AGGG	GGGG	AAGG	AGGG	AGGG	AGGG	AGGG	AGGG	AGGG	AAGG	GGGG	AGGG	AGGG	AGGG	GGGG	GGGG	GGGG	----	GGGG	AGGG	GGGG	GGGG	AGGG	AGGG	AGGG	GGGG	AAGG	AGGG	GGGG	GGGG	AAGG	AAGG	AAGG	GGGG	GGGG	AGGG	AGGG	AGGG	GGGG	GGGG	GGGG	AAGG	AGGG
PotVar0006161	T	G	----	----	----	----	----	----	----	----	----	----	----	----	----	----	----	----	----	----	----	----	----	----	----	----	----	----	----	----	----	----	----	----	----	----	----	----	----	----	----	----	----	----	----	----	----	----	----
PotVar0006168	A	G	----	----	----	----	----	----	----	----	----	----	----	----	----	----	----	----	----	----	----	----	----	----	----	----	----	----	----	----	----	----	----	----	----	----	----	----	----	----	----	----	----	----	----	----	----	----	----
PotVar0006175	A	G	GGGG	GGGG	GGGG	GGGG	GGGG	GGGG	GGGG	GGGG	GGGG	GGGG	GGGG	GGGG	GGGG	GGGG	GGGG	GGGG	GGGG	GGGG	GGGG	GGGG	GGGG	GGGG	GGGG	GGGG	GGGG	GGGG	GGGG	GGGG	GGGG	GGGG	GGGG	GGGG	GGGG	GGGG	GGGG	GGGG	GGGG	GGGG	GGGG	GGGG	GGGG	GGGG	GGGG	GGGG	GGGG	GGGG	GGGG
PotVar0006180	T	G	----	----	----	----	----	----	----	----	----	----	----	----	----	----	----	----	----	----	----	----	----	----	----	----	----	----	----	----	----	----	----	----	----	----	----	----	----	----	----	----	----	----	----	----	----	----	----
PotVar0006193	T	C	----	----	----	----	----	----	----	----	----	----	----	----	----	----	----	----	----	----	----	----	----	----	----	----	----	----	----	----	----	----	----	----	----	----	----	----	----	----	----	----	----	----	----	----	----	----	----
PotVar0006194	A	G	GGGG	GGGG	GGGG	GGGG	GGGG	GGGG	GGGG	GGGG	GGGG	GGGG	GGGG	GGGG	GGGG	GGGG	GGGG	GGGG	GGGG	GGGG	GGGG	GGGG	GGGG	GGGG	GGGG	GGGG	GGGG	GGGG	GGGG	GGGG	GGGG	GGGG	GGGG	GGGG	GGGG	GGGG	GGGG	GGGG	GGGG	GGGG	AGGG	GGGG	GGGG	GGGG	GGGG	GGGG	GGGG	GGGG	GGGG
PotVar0006198	A	G	GGGG	GGGG	GGGG	GGGG	GGGG	GGGG	GGGG	AGGG	AAGG	GGGG	AGGG	GGGG	GGGG	AGGG	AGGG	GGGG	GGGG	GGGG	GGGG	AGGG	GGGG	AGGG	AGGG	AGGG	GGGG	GGGG	AGGG	GGGG	GGGG	AGGG	GGGG	AGGG	----	GGGG	GGGG	GGGG	GGGG	AAGG	GGGG	AGGG	AGGG	GGGG	GGGG	GGGG	AAAG	GGGG	GGGG
PotVar0006219	A	G	----	----	----	----	----	----	----	----	----	----	----	----	----	----	----	----	----	----	----	----	----	----	----	----	----	----	----	----	----	----	----	----	----	----	----	----	----	----	----	----	----	----	----	----	----	----	----
PotVar0006221	A	G	----	----	----	----	----	----	----	----	----	----	----	----	----	----	----	----	----	----	----	----	----	----	----	----	----	----	----	----	----	----	----	----	----	----	----	----	----	----	----	----	----	----	----	----	----	----	----
PotVar0006227	T	C	----	----	----	----	----	----	----	----	----	----	----	----	----	----	----	----	----	----	----	----	----	----	----	----	----	----	----	----	----	----	----	----	----	----	----	----	----	----	----	----	----	----	----	----	----	----	----
PotVar0006233	A	G	----	----	----	----	----	----	----	----	----	----	----	----	----	----	----	----	----	----	----	----	----	----	----	----	----	----	----	----	----	----	----	----	----	----	----	----	----	----	----	----	----	----	----	----	----	----	----
PotVar0006243	T	C	TTTT	TTTC	TTTC	TTTT	TTTC	TTTC	TTCC	TTCC	TCCC	TTTC	CCCC	TTTC	CCCC	CCCC	TTTC	TTCC	TTTC	TTCC	TTCC	TTTC	TTTT	TTTC	TTCC	TTCC	TTTT	TTTT	TTCC	----	TTCC	TTCC	TCCC	TTCC	TTCC	TTCC	TTCC	TTCC	TTCC	TTCC	TTTC	TCCC	TTCC	TTCC	TTCC	TTTT	TCCC	TCCC	TTTC
PotVar0006246	A	G	GGGG	GGGG	AGGG	GGGG	GGGG	AGGG	GGGG	GGGG	GGGG	GGGG	AAGG	GGGG	AAAG	AGGG	GGGG	AGGG	GGGG	AGGG	AAGG	GGGG	GGGG	GGGG	AGGG	GGGG	GGGG	GGGG	GGGG	AGGG	GGGG	AGGG	AGGG	GGGG	AGGG	AGGG	GGGG	GGGG	GGGG	GGGG	GGGG	GGGG	GGGG	AGGG	AAGG	GGGG	GGGG	AGGG	GGGG
PotVar0006259	A	C	----	----	----	----	----	----	----	----	----	----	----	----	----	----	----	----	----	----	----	----	----	----	----	----	----	----	----	----	----	----	----	----	----	----	----	----	----	----	----	----	----	----	----	----	----	----	----
PotVar0006260	T	C	----	----	----	----	----	----	----	----	----	----	----	----	----	----	----	----	----	----	----	----	----	----	----	----	----	----	----	----	----	----	----	----	----	----	----	----	----	----	----	----	----	----	----	----	----	----	----
PotVar0006268	T	C	CCCC	TTCC	CCCC	CCCC	TTCC	CCCC	TTTC	TTTT	TTCC	TTCC	TTCC	TTCC	TTCC	TTCC	CCCC	TTCC	TTTC	TTCC	CCCC	TCCC	CCCC	TCCC	CCCC	TTTC	CCCC	CCCC	TTTC	TTTC	TTTC	TTTC	TTTC	TTTC	CCCC	CCCC	TTTC	TTTC	TTTC	TTTC	TTTC	TTCC	TTTC	TTCC	CCCC	CCCC	TTCC	TTTC	TTTC
PotVar0006273	A	G	AAAA	AAAA	AAAA	AAAA	AAAA	AAAA	AAAA	AAGG	AAAA	AAAA	AAAG	AAAA	AAAA	AAAA	AAAA	AAAA	AAAG	AAAA	AAAA	AAAG	AAAA	AAAA	AAAA	AAAG	AAAA	AAAA	AAAG	AAAG	AAAG	AAGG	AAAA	AAAG	AAAA	AAAA	AAAA	AAAA	AAAA	AAGG	AAGG	AAAA	AAAG	AAAA	AAAA	AAAA	AAGG	AAAA	AAAG
PotVar0006278	T	C	TTTT	TTTC	TTTT	TTTT	TTTC	TTTT	TTCC	TTTC	TTTC	TTTC	TTTT	TTTC	TTTC	TTTC	TTTT	TTTC	----	TTTC	TTTT	TTTT	TTTT	TTTT	TTTT	TTTC	TTTT	TTTT	TTTC	TTTC	TTTC	TTTT	TTCC	TTTC	TTTT	TTTT	TTCC	TTCC	TTCC	TTTT	TTTT	TTTC	TTTC	TTTC	TTTT	TTTT	TTTT	TTCC	TTTC
PotVar0006285	A	G	GGGG	GGGG	GGGG	GGGG	GGGG	GGGG	GGGG	AGGG	GGGG	GGGG	AGGG	GGGG	GGGG	GGGG	GGGG	GGGG	AGGG	GGGG	GGGG	GGGG	GGGG	GGGG	GGGG	GGGG	GGGG	GGGG	GGGG	GGGG	AGGG	AAGG	GGGG	GGGG	GGGG	AGGG	GGGG	GGGG	GGGG	AGGG	AAGG	GGGG	GGGG	GGGG	GGGG	GGGG	GGGG	GGGG	AGGG
PotVar0006304	T	G	TTTT	TTTT	TTTT	TTTT	TTTT	TTTT	TTTT	TTTG	TTTT	TTTT	TTTG	TTTT	TTTT	TTTT	TTTT	TTTT	TTTG	TTTT	TTTT	TTTT	TTTT	TTTT	TTTT	TTTT	TTTT	TTTT	TTTT	TTTT	TTTG	TTGG	TTTT	TTTT	TTTT	TTTT	TTTT	TTTT	TTTT	TTTG	TTGG	TTTT	TTTT	TTTT	TTTT	TTTT	TTTT	TTTT	TTTG
PotVar0006306	T	C	TTTT	TTTT	TTTT	TTTT	TTTT	TTTT	TTTT	TTTC	TTTT	TTTT	TTTT	TTTT	TTTT	TTTT	TTTT	TTTT	TTTT	TTTT	TTTT	TTTC	TTTT	TTTT	TTTT	TTTC	TTTT	TTTT	TTTC	TTTC	TTTT	TTTT	TTTT	TTTC	TTTT	TTTT	TTTT	TTTT	TTTT	TTTC	TTTT	TTTT	TTTC	TTTT	TTTT	TTTT	TTCC	TTTT	TTTT
PotVar0006319	T	C	----	----	----	----	----	----	----	----	----	----	----	----	----	----	----	----	----	----	----	----	----	----	----	----	----	----	----	----	----	----	----	----	----	----	----	----	----	----	----	----	----	----	----	----	----	----	----
PotVar0006320	T	C	TTTT	TTTT	TTTT	TTTT	TTTT	TTTT	TTTT	TTTT	TTTT	TTTT	TTTT	TTTT	TTTT	TTTT	TTTT	TTTT	TTTT	TTTT	TTTT	TTTT	TTTT	TTTT	TTTT	TTTT	TTTT	TTTT	TTTT	TTTT	TTTT	TTTT	TTTT	TTTT	TTTT	TTTT	TTTT	TTTT	TTTT	TTTT	TTTC	TTTT	TTTT	TTTT	TTTT	TTTT	TTTT	TTTT	TTTT
PotVar0006336	T	C	CCCC	CCCC	CCCC	CCCC	CCCC	CCCC	CCCC	CCCC	CCCC	CCCC	CCCC	CCCC	CCCC	CCCC	CCCC	CCCC	CCCC	CCCC	CCCC	CCCC	CCCC	CCCC	CCCC	CCCC	CCCC	CCCC	CCCC	CCCC	CCCC	CCCC	CCCC	CCCC	CCCC	TCCC	CCCC	CCCC	CCCC	CCCC	CCCC	CCCC	CCCC	CCCC	CCCC	CCCC	CCCC	CCCC	CCCC
PotVar0006338	T	C	CCCC	CCCC	CCCC	CCCC	CCCC	CCCC	CCCC	TCCC	CCCC	CCCC	CCCC	CCCC	CCCC	CCCC	CCCC	CCCC	CCCC	CCCC	CCCC	TCCC	CCCC	CCCC	CCCC	TCCC	CCCC	CCCC	TCCC	TCCC	CCCC	CCCC	CCCC	TCCC	CCCC	CCCC	CCCC	CCCC	CCCC	TCCC	CCCC	CCCC	TCCC	CCCC	CCCC	CCCC	TTCC	CCCC	CCCC
PotVar0006339	A	G	----	----	----	----	----	----	----	----	----	----	----	----	----	----	----	----	----	----	----	----	----	----	----	----	----	----	----	----	----	----	----	----	----	----	----	----	----	----	----	----	----	----	----	----	----	----	----
PotVar0006353	A	G	----	----	----	----	----	----	----	----	----	----	----	----	----	----	----	----	----	----	----	----	----	----	----	----	----	----	----	----	----	----	----	----	----	----	----	----	----	----	----	----	----	----	----	----	----	----	----
PotVar0006356	A	G	GGGG	GGGG	AGGG	GGGG	GGGG	AGGG	GGGG	AGGG	GGGG	GGGG	AAAG	GGGG	AAAG	AGGG	GGGG	GGGG	GGGG	GGGG	AAGG	GGGG	GGGG	GGGG	AGGG	GGGG	GGGG	GGGG	GGGG	AGGG	AGGG	AAAG	AGGG	GGGG	AGGG	AGGG	GGGG	GGGG	GGGG	AGGG	AAGG	GGGG	GGGG	AGGG	AAGG	GGGG	GGGG	AGGG	AGGG
PotVar0006384	A	G	GGGG	GGGG	GGGG	GGGG	GGGG	GGGG	GGGG	GGGG	AGGG	AGGG	GGGG	GGGG	GGGG	AGGG	GGGG	AGGG	GGGG	GGGG	GGGG	GGGG	AGGG	GGGG	GGGG	AGGG	GGGG	GGGG	AAGG	AGGG	GGGG	GGGG	GGGG	AGGG	GGGG	GGGG	GGGG	GGGG	GGGG	GGGG	GGGG	GGGG	AGGG	GGGG	GGGG	GGGG	GGGG	GGGG	GGGG
PotVar0006386	A	G	----	----	----	----	----	----	----	----	----	----	----	----	----	----	----	----	----	----	----	----	----	----	----	----	----	----	----	----	----	----	----	----	----	----	----	----	----	----	----	----	----	----	----	----	----	----	----
PotVar0006391	A	G	----	----	----	----	----	----	----	----	----	----	----	----	----	----	----	----	----	----	----	----	----	----	----	----	----	----	----	----	----	----	----	----	----	----	----	----	----	----	----	----	----	----	----	----	----	----	----
PotVar0006395	A	G	AAAG	AAAA	AAAG	AAAG	AAAA	AAAG	AAAA	AAAA	AAAG	AAGG	AAAA	AAAG	AAAG	AAAG	AAAA	AAAG	AAAG	AAAA	AAAG	AAAG	AAAG	AAAA	AAAG	AAAG	AAAA	AAAA	AAGG	AAAG	AAAA	AAAG	AAAA	AAAG	AAAG	AAGG	AAAA	AAAA	AAAA	AAAG	AAAG	AAAA	AAAG	AAAA	AAAA	AAAA	AAAA	AAAA	AAAG
PotVar0006407	A	G	----	----	----	----	----	----	----	----	----	----	----	----	----	----	----	----	----	----	----	----	----	----	----	----	----	----	----	----	----	----	----	----	----	----	----	----	----	----	----	----	----	----	----	----	----	----	----
PotVar0006425	T	C	----	----	----	----	----	----	----	----	----	----	----	----	----	----	----	----	----	----	----	----	----	----	----	----	----	----	----	----	----	----	----	----	----	----	----	----	----	----	----	----	----	----	----	----	----	----	----
PotVar0006430	A	G	AGGG	GGGG	AGGG	AGGG	GGGG	AGGG	GGGG	GGGG	GGGG	AGGG	AGGG	AGGG	GGGG	GGGG	GGGG	GGGG	GGGG	GGGG	AGGG	GGGG	GGGG	GGGG	GGGG	GGGG	GGGG	GGGG	GGGG	GGGG	AGGG	GGGG	GGGG	GGGG	GGGG	GGGG	GGGG	GGGG	GGGG	GGGG	GGGG	GGGG	GGGG	GGGG	GGGG	GGGG	GGGG	GGGG	GGGG
PotVar0006431	A	G	GGGG	GGGG	GGGG	GGGG	GGGG	GGGG	GGGG	GGGG	GGGG	GGGG	GGGG	GGGG	AGGG	GGGG	GGGG	GGGG	GGGG	GGGG	GGGG	GGGG	GGGG	GGGG	AGGG	GGGG	GGGG	GGGG	GGGG	GGGG	GGGG	GGGG	GGGG	GGGG	AGGG	GGGG	GGGG	GGGG	GGGG	GGGG	GGGG	GGGG	GGGG	GGGG	GGGG	GGGG	GGGG	GGGG	GGGG
PotVar0006435	T	C	TTCC	TTTC	TTTC	TTTC	TTTC	TTTC	TTCC	TTCC	TTCC	TCCC	TTTT	TTCC	TTTC	TCCC	TCCC	TTCC	TCCC	TTCC	TTTT	TCCC	TCCC	TTCC	TTCC	TTCC	TTCC	TTCC	TCCC	TTCC	TTTC	TTCC	TTCC	CCCC	TTCC	CCCC	TTTC	TCCC	TTCC	TCCC	TTCC	TTCC	CCCC	TTCC	TCCC	TCCC	TTTC	TCCC	TCCC
PotVar0006452	A	G	AAGG	GGGG	AGGG	AGGG	GGGG	AGGG	AGGG	AGGG	AAGG	AAAG	GGGG	AAGG	GGGG	AAGG	AAAG	AAGG	AGGG	GGGG	GGGG	AAGG	AAAG	AAGG	AGGG	AAGG	AGGG	AGGG	AAGG	AGGG	GGGG	GGGG	GGGG	AAGG	AGGG	AGGG	AGGG	AGGG	AAGG	AGGG	GGGG	AGGG	AAAG	AAGG	AAAG	AAAG	GGGG	AAGG	AGGG
PotVar0006454	T	G	----	----	----	----	----	----	----	----	----	----	----	----	----	----	----	----	----	----	----	----	----	----	----	----	----	----	----	----	----	----	----	----	----	----	----	----	----	----	----	----	----	----	----	----	----	----	----
PotVar0006513	T	C	----	----	----	----	----	----	----	----	----	----	----	----	----	----	----	----	----	----	----	----	----	----	----	----	----	----	----	----	----	----	----	----	----	----	----	----	----	----	----	----	----	----	----	----	----	----	----
PotVar0006541	A	G	----	----	----	----	----	----	----	----	----	----	----	----	----	----	----	----	----	----	----	----	----	----	----	----	----	----	----	----	----	----	----	----	----	----	----	----	----	----	----	----	----	----	----	----	----	----	----
PotVar0006542	T	C	----	----	----	----	----	----	----	----	----	----	----	----	----	----	----	----	----	----	----	----	----	----	----	----	----	----	----	----	----	----	----	----	----	----	----	----	----	----	----	----	----	----	----	----	----	----	----
PotVar0006545	T	C	----	----	----	----	----	----	----	----	----	----	----	----	----	----	----	----	----	----	----	----	----	----	----	----	----	----	----	----	----	----	----	----	----	----	----	----	----	----	----	----	----	----	----	----	----	----	----
PotVar0006549	T	C	----	----	----	----	----	----	----	----	----	----	----	----	----	----	----	----	----	----	----	----	----	----	----	----	----	----	----	----	----	----	----	----	----	----	----	----	----	----	----	----	----	----	----	----	----	----	----
PotVar0006550	T	C	----	----	----	----	----	----	----	----	----	----	----	----	----	----	----	----	----	----	----	----	----	----	----	----	----	----	----	----	----	----	----	----	----	----	----	----	----	----	----	----	----	----	----	----	----	----	----
PotVar0006551	A	G	----	----	----	----	----	----	----	----	----	----	----	----	----	----	----	----	----	----	----	----	----	----	----	----	----	----	----	----	----	----	----	----	----	----	----	----	----	----	----	----	----	----	----	----	----	----	----
PotVar0006555	T	C	----	----	----	----	----	----	----	----	----	----	----	----	----	----	----	----	----	----	----	----	----	----	----	----	----	----	----	----	----	----	----	----	----	----	----	----	----	----	----	----	----	----	----	----	----	----	----
PotVar0006582	A	G	----	----	----	----	----	----	----	----	----	----	----	----	----	----	----	----	----	----	----	----	----	----	----	----	----	----	----	----	----	----	----	----	----	----	----	----	----	----	----	----	----	----	----	----	----	----	----
PotVar0006618	T	C	----	----	----	----	----	----	----	----	----	----	----	----	----	----	----	----	----	----	----	----	----	----	----	----	----	----	----	----	----	----	----	----	----	----	----	----	----	----	----	----	----	----	----	----	----	----	----
PotVar0006643	T	C	TTTC	TTTT	TTTC	TTTT	TTTT	TTTT	TTTC	TTTT	TTTC	TTTT	TTTT	TTTT	TTTT	TTTC	TTTT	TTTT	TTTT	TTTT	TTTT	TTTT	TTTT	TTTT	TTTT	TTTT	TTTT	TTTT	TTTT	TTTT	TTTT	TTTT	TTTT	TTTC	TTTT	TTTT	TTTT	TTTT	TTTT	TTTT	TTTC	TTTT	TTTT	TTTT	TTTT	TTTT	TTTT	TTTT	TTTT
PotVar0006651	A	C	----	----	----	----	----	----	----	----	----	----	----	----	----	----	----	----	----	----	----	----	----	----	----	----	----	----	----	----	----	----	----	----	----	----	----	----	----	----	----	----	----	----	----	----	----	----	----
PotVar0006681	T	C	CCCC	CCCC	CCCC	TTCC	TCCC	CCCC	TCCC	TCCC	CCCC	TCCC	TTCC	TTCC	CCCC	CCCC	CCCC	CCCC	TCCC	TCCC	CCCC	TCCC	TCCC	TCCC	TTCC	CCCC	TTCC	TTCC	CCCC	TCCC	TTTC	CCCC	TCCC	CCCC	TTCC	CCCC	TCCC	CCCC	TTCC	TCCC	TCCC	TTCC	CCCC	CCCC	TCCC	TCCC	CCCC	CCCC	TTCC
PotVar0006684	A	G	AAAA	AAAG	AAGG	AGGG	AAGG	AAAA	AAGG	AAGG	AAGG	AAGG	AGGG	AAGG	AAGG	AGGG	AGGG	AAAA	AGGG	AAGG	AGGG	AGGG	AAGG	AAAG	AAGG	AAAA	AGGG	AGGG	AAAG	AAGG	GGGG	AAAG	AGGG	AAAG	AAGG	AAGG	AAAG	AAAG	AGGG	AGGG	AAGG	GGGG	AAAG	AAAA	AGGG	AAGG	AGGG	AAAG	AGGG
PotVar0006700	T	C	CCCC	TCCC	TCCC	CCCC	CCCC	CCCC	CCCC	TCCC	TCCC	CCCC	CCCC	CCCC	CCCC	CCCC	CCCC	CCCC	CCCC	CCCC	TCCC	TTCC	TCCC	CCCC	CCCC	CCCC	CCCC	CCCC	TCCC	----	CCCC	CCCC	TCCC	TCCC	CCCC	CCCC	CCCC	CCCC	CCCC	CCCC	CCCC	TCCC	CCCC	CCCC	TCCC	CCCC	TTCC	TCCC	TCCC
PotVar0006717	T	C	----	----	----	----	----	----	----	----	----	----	----	----	----	----	----	----	----	----	----	----	----	----	----	----	----	----	----	----	----	----	----	----	----	----	----	----	----	----	----	----	----	----	----	----	----	----	----
PotVar0006735	T	G	TTTT	TTTG	TTTG	TTTT	TTTT	TTTT	TTTT	TTTG	TTTG	TTTT	TTTT	TTTT	TTTT	TTTT	TTTT	TTTT	TTTT	TTTT	TTTG	TTGG	TTTG	TTTT	TTTT	TTTT	TTTT	TTTT	TTTG	TTTG	TTTG	TTTT	TTTG	TTTG	TTTT	TTTT	TTTT	TTTT	TTTT	TTTT	TTTG	TTTG	TTTT	TTTT	TTTG	TTTT	TTGG	TTTG	TTTG
PotVar0006747	A	G	AAAA	AAAA	AAAA	AAAA	AAAA	AAAA	AAAA	AAAA	AAAA	AAAA	AAAA	AAAA	AAAA	AAAA	AAAA	AAAA	AAAA	AAAA	AAAA	AAAA	AAAA	AAAA	AAAA	AAAA	AAAA	AAAA	AAAA	AAAA	AAAA	AAAA	AAAA	AAAA	AAAA	AAAA	AAAA	AAAA	AAAA	AAAA	AAAA	AAAA	AAAA	AAAA	AAAA	AAAA	AAAA	AAAA	AAAA
PotVar0006749	A	G	AAAA	AAAA	AAAA	AAAA	AAAA	AAAA	AAAA	AAAA	AAAA	AAAA	AAAA	AAAA	AAAA	AAAA	AAAA	AAAA	AAAA	AAAA	AAAA	AAAA	AAAA	AAAA	AAAA	AAAA	AAAA	AAAA	AAAA	AAAA	AAAA	AAAA	AAAA	AAAA	AAAA	AAAA	AAAA	AAAA	AAAA	AAAA	AAAA	AAAA	AAAA	AAAA	AAAA	AAAA	AAAA	AAAA	AAAA
PotVar0006752	T	C	TTTT	TTTT	TTTC	TTTC	TTTC	TTTT	TTTC	TTTT	TTTC	TTTC	TTTC	TTTT	----	TCCC	TTCC	TTTT	TTCC	TTTC	TTCC	TTTT	TTTT	TTTT	TTTT	TTTT	TTTC	TTTC	TTTT	TTTC	TTTT	TTTC	TTTT	TTTT	TTTT	TTTC	TTTT	TTTC	TTTC	TTCC	TTTT	TTTC	TTTC	TTTT	TTTC	TTTC	TTTC	TTTT	TTTT
PotVar0006754	T	C	----	----	----	----	----	----	----	----	----	----	----	----	----	----	----	----	----	----	----	----	----	----	----	----	----	----	----	----	----	----	----	----	----	----	----	----	----	----	----	----	----	----	----	----	----	----	----
PotVar0006761	T	C	TTTT	TTTT	TTTC	TTTT	TTTT	TTTT	TTTT	TTTT	TTTC	TTTT	TTTC	TTTT	TTTT	TTCC	TTTT	TTTT	TTTC	TTTT	TTTC	TTTT	TTTT	TTTT	TTTT	TTTT	TTTC	TTTC	TTTT	----	TTTT	TTTC	TTTT	TTTT	TTTT	TTTT	TTTT	TTTC	TTTC	TTTC	TTTT	TTTC	TTTC	TTTT	TTTC	TTTC	TTTT	TTTT	TTTT
PotVar0006784	T	G	----	----	----	----	----	----	----	----	----	----	----	----	----	----	----	----	----	----	----	----	----	----	----	----	----	----	----	----	----	----	----	----	----	----	----	----	----	----	----	----	----	----	----	----	----	----	----
PotVar0006793	T	C	TTTT	TTTT	TTTC	TTTC	TTTT	TTTT	TTTC	TTTT	TTTC	TTTC	TTTC	TTTT	TTCC	TCCC	TTCC	TTTT	TTTC	TTTT	TTCC	TTTT	TTTT	TTTT	TTTT	TTTT	TTTC	TTTC	TTTT	----	----	TTTC	TTTT	TTTT	TTTT	TTTC	TTTT	TTTC	TTTC	TTCC	----	TTTC	TTTC	TTTT	TTTC	TTTC	TTTC	TTTT	TTTT
PotVar0006803	A	C	CCCC	CCCC	CCCC	AACC	ACCC	CCCC	ACCC	ACCC	CCCC	ACCC	AACC	AACC	CCCC	CCCC	CCCC	CCCC	ACCC	ACCC	CCCC	ACCC	ACCC	ACCC	AACC	CCCC	AACC	AACC	CCCC	ACCC	AAAC	CCCC	AACC	CCCC	AACC	CCCC	ACCC	CCCC	AACC	ACCC	ACCC	ACCC	CCCC	CCCC	ACCC	ACCC	CCCC	CCCC	AACC
PotVar0006824	A	C	CCCC	CCCC	CCCC	CCCC	CCCC	CCCC	CCCC	CCCC	CCCC	CCCC	CCCC	CCCC	CCCC	CCCC	ACCC	CCCC	CCCC	CCCC	CCCC	CCCC	CCCC	CCCC	CCCC	CCCC	CCCC	CCCC	CCCC	CCCC	CCCC	CCCC	CCCC	CCCC	CCCC	CCCC	CCCC	CCCC	CCCC	CCCC	CCCC	CCCC	CCCC	CCCC	CCCC	CCCC	CCCC	CCCC	CCCC
PotVar0006826	A	G	AAAA	AAAA	AAAA	AAAA	AAAA	AAAA	AAAA	AAAA	AAAA	AAAG	AAAA	AAAA	AAAA	AAAG	AAAA	AAAA	AAAA	AAAA	AAAA	AAAA	AAAA	AAAA	AAAA	AAAA	AAAA	AAAA	AAAA	AAAA	AAAA	AAAA	AAAA	AAAA	AAAA	AAAA	AAAA	AAAA	AAAA	AAAA	AAAA	AAAA	AAAA	AAAA	AAAA	AAAA	AAAA	AAAA	AAAA
PotVar0006827	A	G	----	----	----	----	----	----	----	----	----	----	----	----	----	----	----	----	----	----	----	----	----	----	----	----	----	----	----	----	----	----	----	----	----	----	----	----	----	----	----	----	----	----	----	----	----	----	----
PotVar0006850	A	G	GGGG	GGGG	GGGG	GGGG	GGGG	GGGG	GGGG	GGGG	GGGG	GGGG	GGGG	GGGG	GGGG	GGGG	GGGG	GGGG	GGGG	GGGG	GGGG	GGGG	GGGG	GGGG	GGGG	GGGG	GGGG	GGGG	GGGG	GGGG	GGGG	GGGG	GGGG	GGGG	GGGG	GGGG	GGGG	GGGG	GGGG	GGGG	GGGG	GGGG	GGGG	GGGG	GGGG	GGGG	GGGG	GGGG	GGGG
PotVar0006851	T	C	CCCC	CCCC	CCCC	CCCC	CCCC	CCCC	CCCC	CCCC	CCCC	TCCC	CCCC	CCCC	CCCC	TCCC	CCCC	CCCC	CCCC	CCCC	CCCC	CCCC	CCCC	CCCC	CCCC	CCCC	CCCC	CCCC	CCCC	CCCC	CCCC	CCCC	CCCC	CCCC	CCCC	CCCC	CCCC	CCCC	CCCC	CCCC	CCCC	CCCC	CCCC	CCCC	CCCC	CCCC	CCCC	CCCC	CCCC
PotVar0006863	A	C	AAAA	AAAC	AACC	ACCC	AACC	AAAA	AACC	AACC	AACC	AACC	ACCC	AACC	AACC	ACCC	ACCC	AAAA	ACCC	AACC	ACCC	ACCC	AACC	AAAC	AACC	AAAA	ACCC	ACCC	AAAC	AACC	CCCC	AAAC	ACCC	AAAC	AACC	AACC	AAAC	AAAC	ACCC	ACCC	AACC	CCCC	AAAC	AAAA	ACCC	AACC	ACCC	AAAC	ACCC
PotVar0006870	A	G	GGGG	GGGG	GGGG	GGGG	GGGG	GGGG	GGGG	GGGG	GGGG	GGGG	GGGG	GGGG	GGGG	GGGG	GGGG	GGGG	GGGG	GGGG	GGGG	GGGG	GGGG	GGGG	GGGG	GGGG	GGGG	GGGG	GGGG	GGGG	GGGG	GGGG	GGGG	GGGG	GGGG	GGGG	GGGG	GGGG	GGGG	GGGG	GGGG	GGGG	GGGG	GGGG	GGGG	GGGG	GGGG	GGGG	GGGG
PotVar0006881	T	C	CCCC	CCCC	CCCC	CCCC	CCCC	CCCC	CCCC	CCCC	CCCC	CCCC	TCCC	CCCC	CCCC	CCCC	CCCC	CCCC	CCCC	CCCC	CCCC	CCCC	CCCC	CCCC	TCCC	CCCC	TCCC	TCCC	TCCC	TCCC	TTCC	CCCC	TCCC	TCCC	TCCC	CCCC	CCCC	CCCC	CCCC	CCCC	TCCC	CCCC	CCCC	CCCC	CCCC	TCCC	CCCC	CCCC	CCCC
PotVar0006893	T	C	TTTT	TTTT	TTTC	TTTC	TTTC	TTCC	TTTC	TTTT	TTTC	TTCC	TTTC	TTTT	TTCC	TTCC	TCCC	TTTT	TTCC	TTTC	TTCC	TTTT	TTTT	TTTT	TTTT	TTTT	TTTC	TTTC	TTTT	----	TTTT	TTTC	TTTT	TTTT	TTTT	TTCC	TTTT	TTTC	TTTC	TTCC	TTTT	TTTC	TTTC	TTTT	TTTC	TTTC	TTTC	TTTT	TTTT
PotVar0006898	A	G	AAAA	AAAA	AAAG	AAAG	AAAG	AAGG	AAAA	AAAA	AAAG	AAGG	AAGG	AAAA	AAAA	AAGG	AAGG	AAAA	AAGG	AAAG	AAAG	AAAA	AAAA	AAAA	AAAG	AAAA	AAGG	AAGG	AAAG	AAAG	AAGG	AAAG	AAAG	AAAG	AAAG	AAGG	AAAA	AAAG	AAAG	AAAG	AAAG	AAAG	AAAG	AAAA	AAAG	AAGG	AAAA	AAAA	AAAA
PotVar0006910	T	C	TTTT	TTTT	TTTT	TTTT	TTTT	TTTT	TTTT	TTTT	TTTT	TTTT	TTTT	TTTT	TTTT	TTTT	TTTT	TTTT	TTTT	TTTT	TTTT	TTTT	TTTT	TTTT	TTTT	TTTT	TTTT	TTTT	TTTT	TTTT	TTTT	TTTT	TTTC	TTTT	TTTT	TTTT	TTTT	TTTT	TTTT	TTTT	TTTT	TTTT	TTTT	TTTT	TTTT	TTTT	TTTT	TTTT	TTTT
PotVar0006912	T	G	----	----	----	----	----	----	----	----	----	----	----	----	----	----	----	----	----	----	----	----	----	----	----	----	----	----	----	----	----	----	----	----	----	----	----	----	----	----	----	----	----	----	----	----	----	----	----
PotVar0006913	T	C	TTTT	TTTT	TTTT	TTTT	TTTT	TTTT	TTTT	TTTT	TTTT	TTTT	TTTT	TTTT	TTTT	TTTT	TTTT	TTTT	TTTT	TTTT	TTTT	TTTT	TTTT	TTTT	TTTT	TTTT	TTTT	TTTT	TTTT	TTTT	TTTT	TTTT	TTTT	TTTT	TTTT	TTTT	TTTT	TTTT	TTTT	TTTT	TTTT	TTTT	TTTT	TTTT	TTTT	TTTT	TTTT	TTTT	TTTT
PotVar0006916	A	C	CCCC	CCCC	ACCC	CCCC	CCCC	AACC	CCCC	CCCC	ACCC	AACC	ACCC	CCCC	CCCC	AACC	CCCC	CCCC	ACCC	CCCC	ACCC	CCCC	CCCC	CCCC	CCCC	CCCC	ACCC	ACCC	CCCC	----	CCCC	ACCC	CCCC	CCCC	CCCC	CCCC	CCCC	ACCC	ACCC	ACCC	CCCC	ACCC	ACCC	CCCC	ACCC	ACCC	CCCC	CCCC	CCCC
PotVar0006921	A	C	----	----	----	----	----	----	----	----	----	----	----	----	----	----	----	----	----	----	----	----	----	----	----	----	----	----	----	----	----	----	----	----	----	----	----	----	----	----	----	----	----	----	----	----	----	----	----
PotVar0006925	T	G	GGGG	GGGG	TGGG	GGGG	GGGG	GGGG	GGGG	TGGG	TGGG	GGGG	TGGG	GGGG	GGGG	GGGG	TGGG	GGGG	GGGG	GGGG	TGGG	TTGG	TGGG	GGGG	TGGG	GGGG	TGGG	TGGG	TGGG	----	TTGG	GGGG	TTTG	TGGG	TGGG	GGGG	GGGG	GGGG	GGGG	GGGG	TGGG	GGGG	GGGG	GGGG	TGGG	TGGG	TTGG	TGGG	TGGG
PotVar0006933	T	C	TTTT	TTTT	TTTT	TTTT	TTTT	TTTT	TTTC	TTTT	TTTT	TTTT	TTTT	TTTT	TTCC	TTTT	TTTC	TTTT	TTTT	TTTT	TTTC	TTTT	TTTT	TTTT	TTTT	TTTT	TTTT	TTTT	TTTT	TTTT	TTTT	TTTT	TTTT	TTTT	TTTT	TTTT	TTTT	TTTT	TTTT	TTTC	TTTT	TTTT	TTTT	TTTT	TTTT	TTTT	TTTC	TTTT	TTTT
PotVar0006934	A	C	CCCC	CCCC	CCCC	CCCC	CCCC	CCCC	CCCC	CCCC	CCCC	CCCC	CCCC	CCCC	CCCC	CCCC	ACCC	CCCC	CCCC	CCCC	CCCC	CCCC	CCCC	CCCC	CCCC	CCCC	CCCC	CCCC	CCCC	CCCC	CCCC	CCCC	CCCC	CCCC	CCCC	CCCC	CCCC	CCCC	CCCC	CCCC	CCCC	CCCC	CCCC	CCCC	CCCC	CCCC	CCCC	CCCC	CCCC
PotVar0006936	A	G	AAAA	AAAA	AAAA	AAAA	AAAA	AAAA	AAAA	AAAA	AAAA	AAAA	AAAA	AAAA	AAAA	AAAA	AAAA	AAAA	AAAA	AAAA	AAAA	AAAA	AAAA	AAAA	AAAA	AAAA	AAAA	AAAA	AAAA	AAAA	AAAA	AAAA	AAAA	AAAA	AAAA	AAAA	AAAA	AAAA	AAAA	AAAA	AAAA	AAAA	AAAA	AAAA	AAAA	AAAA	AAAA	AAAA	AAAA
PotVar0006947	T	C	TTTT	TTTT	TTTC	TTTT	TTTT	TTTT	TTTT	TTTC	TTTC	TTTT	TTTT	TTTT	TTTT	TTTT	TTTT	TTTT	TTTT	TTTT	TTTC	TTCC	TTTC	TTTT	TTTT	TTTT	TTTT	TTTT	TTTT	TTTT	TTTT	TTTT	TTTC	TTTT	TTTT	TTTT	TTTT	TTTT	TTTT	TTTT	TTTT	TTTT	TTTT	TTTT	TTTC	TTTT	TTCC	TTTC	TTTC
PotVar0006948	T	C	CCCC	TTCC	TCCC	TTTC	TTCC	TTCC	TTCC	TCCC	TTCC	TTTC	TTCC	TTCC	TTCC	TTTC	TTTC	CCCC	TTTC	TTCC	TTCC	TCCC	TCCC	TCCC	TCCC	CCCC	TTCC	TTCC	CCCC	TCCC	TTCC	TCCC	TCCC	CCCC	TCCC	TTCC	TCCC	TCCC	TTTC	TTTC	TCCC	TTTT	TCCC	CCCC	TTCC	TCCC	TCCC	CCCC	TTCC
PotVar0006964	A	G	----	----	----	----	----	----	----	----	----	----	----	----	----	----	----	----	----	----	----	----	----	----	----	----	----	----	----	----	----	----	----	----	----	----	----	----	----	----	----	----	----	----	----	----	----	----	----
PotVar0006988	A	G	----	----	----	----	----	----	----	----	----	----	----	----	----	----	----	----	----	----	----	----	----	----	----	----	----	----	----	----	----	----	----	----	----	----	----	----	----	----	----	----	----	----	----	----	----	----	----
PotVar0006989	A	G	AAAG	AAAA	AAAG	AAAA	AAAG	AAGG	AAAA	AAAA	AAAG	AAAG	AAAG	AAAA	AAAA	AAGG	AAAG	AAAA	AAGG	AAAG	AAAG	AAAA	AAAA	AAAA	AAAA	AAAA	AAAG	AAAG	AAAA	AAAG	AAAA	AAGG	AAAA	AAAA	AAAA	AAGG	AAAA	AAAG	AAAG	AAAG	AAAG	AAAA	AAGG	AAAA	AAAG	AAAG	AAAA	AAAA	AAAA
PotVar0006992	A	C	----	----	----	----	----	----	----	----	----	----	----	----	----	----	----	----	----	----	----	----	----	----	----	----	----	----	----	----	----	----	----	----	----	----	----	----	----	----	----	----	----	----	----	----	----	----	----
PotVar0007012	A	G	GGGG	GGGG	GGGG	GGGG	AGGG	GGGG	AGGG	GGGG	GGGG	GGGG	GGGG	GGGG	AAGG	GGGG	GGGG	GGGG	AGGG	AGGG	AGGG	GGGG	GGGG	GGGG	GGGG	GGGG	GGGG	GGGG	GGGG	GGGG	GGGG	GGGG	GGGG	GGGG	GGGG	GGGG	GGGG	GGGG	GGGG	AGGG	GGGG	GGGG	GGGG	GGGG	GGGG	GGGG	AGGG	GGGG	GGGG
PotVar0007040	T	C	CCCC	CCCC	CCCC	CCCC	CCCC	CCCC	CCCC	CCCC	CCCC	CCCC	TCCC	CCCC	CCCC	CCCC	CCCC	CCCC	CCCC	CCCC	CCCC	CCCC	CCCC	CCCC	TCCC	CCCC	TCCC	TCCC	CCCC	CCCC	CCCC	CCCC	TCCC	CCCC	TCCC	CCCC	CCCC	CCCC	CCCC	CCCC	CCCC	CCCC	CCCC	CCCC	CCCC	TCCC	CCCC	CCCC	CCCC
PotVar0007045	A	G	AAGG	AAGG	AAAG	AGGG	AAGG	AAGG	AGGG	AAAG	AAGG	AAGG	AGGG	----	AAGG	AGGG	AGGG	AAAG	AGGG	AAGG	AAGG	AAAG	AAAG	AAAG	AAGG	AAGG	AGGG	AGGG	AAGG	AGGG	GGGG	AAGG	AAAG	AAGG	AAGG	AAGG	AAAG	AAAG	AGGG	AGGG	AGGG	AAGG	AAGG	AAAA	AAGG	AAGG	AAAG	AAAG	AAGG
PotVar0007046	T	C	CCCC	CCCC	CCCC	CCCC	CCCC	CCCC	TCCC	CCCC	CCCC	CCCC	CCCC	CCCC	TTCC	CCCC	CCCC	CCCC	CCCC	CCCC	TCCC	CCCC	CCCC	CCCC	CCCC	CCCC	CCCC	CCCC	CCCC	CCCC	CCCC	CCCC	CCCC	CCCC	CCCC	CCCC	CCCC	CCCC	CCCC	TCCC	CCCC	CCCC	CCCC	CCCC	CCCC	CCCC	TCCC	CCCC	CCCC
PotVar0007051	A	G	AAAA	AAAA	AAAA	AAAA	AAAA	AAAA	AAAA	AAAA	AAAA	AAAA	AAAA	AAAA	AAAA	AAAA	AAAA	AAAA	AAAA	AAAA	AAAA	AAAA	AAAA	AAAA	AAAA	AAAA	AAAA	AAAA	AAAA	AAAA	AAAA	AAAA	AAAA	AAAA	AAAA	AAAA	AAAA	AAAA	AAAA	AAAA	AAAA	AAAA	AAAA	AAAA	AAAA	AAAA	AAAA	AAAA	AAAA
PotVar0007054	A	G	GGGG	GGGG	GGGG	GGGG	GGGG	GGGG	GGGG	GGGG	GGGG	GGGG	GGGG	GGGG	GGGG	GGGG	AGGG	GGGG	GGGG	GGGG	GGGG	GGGG	GGGG	GGGG	GGGG	GGGG	GGGG	GGGG	GGGG	GGGG	GGGG	GGGG	GGGG	GGGG	GGGG	GGGG	GGGG	GGGG	GGGG	GGGG	GGGG	GGGG	GGGG	GGGG	GGGG	GGGG	GGGG	GGGG	GGGG
PotVar0007066	A	G	AAAG	AAAA	AAAG	AAAG	AAAG	AAGG	AAAG	AAAA	AAAG	AAAG	AAAG	AAAA	AAGG	AAGG	AAGG	AAAA	AAGG	AAAG	AAGG	AAAA	AAAA	AAAA	AAAA	AAAA	AAAG	AAAG	AAAA	AAAG	AAAA	AAGG	AAAA	AAAA	AAAA	AAGG	AAAA	AAAG	AAAG	AAGG	AAAG	AAAA	AAGG	AAAA	AAAG	AAAG	AAAG	AAAA	AAAA
PotVar0007079	T	C	----	----	----	----	----	----	----	----	----	----	----	----	----	----	----	----	----	----	----	----	----	----	----	----	----	----	----	----	----	----	----	----	----	----	----	----	----	----	----	----	----	----	----	----	----	----	----
PotVar0007135	T	C	CCCC	CCCC	CCCC	CCCC	CCCC	CCCC	TCCC	CCCC	CCCC	CCCC	CCCC	CCCC	TTCC	CCCC	CCCC	CCCC	CCCC	CCCC	TCCC	CCCC	CCCC	CCCC	CCCC	CCCC	CCCC	CCCC	CCCC	CCCC	CCCC	CCCC	CCCC	CCCC	CCCC	CCCC	CCCC	CCCC	CCCC	TCCC	CCCC	CCCC	CCCC	CCCC	CCCC	CCCC	TCCC	CCCC	CCCC
PotVar0007140	A	G	AAAG	AAGG	AAAA	AAAA	AAAA	AAAA	AAAG	AAAA	AAAG	AAAA	AAAA	AAAA	AAAA	AAAA	AAAG	AAAG	AAAA	AAAA	AAAA	AAAA	AAAA	AAAA	AAAA	AAGG	AAAA	AAAA	AAAG	AAAG	AAAG	AAAA	AAAA	AAAG	AAAA	AAAA	AAAA	AAAA	AAAA	AAAA	AAAA	AAAA	AAAA	AAAA	AAAA	AAAA	AAAA	AAAG	AAAA
PotVar0007146	T	C	TCCC	----	CCCC	TTCC	TCCC	CCCC	TTCC	TCCC	TCCC	TCCC	TCCC	TTCC	CCCC	TCCC	TCCC	TCCC	TCCC	TCCC	CCCC	TCCC	TCCC	TCCC	TCCC	TTCC	TCCC	TCCC	TCCC	----	TTTT	CCCC	CCCC	TCCC	TCCC	CCCC	TCCC	CCCC	TTCC	CCCC	TTCC	TTCC	CCCC	CCCC	TCCC	CCCC	CCCC	TCCC	TTCC
PotVar0007158	T	C	----	----	----	----	----	----	----	----	----	----	----	----	----	----	----	----	----	----	----	----	----	----	----	----	----	----	----	----	----	----	----	----	----	----	----	----	----	----	----	----	----	----	----	----	----	----	----
PotVar0007178	A	G	GGGG	GGGG	GGGG	GGGG	GGGG	GGGG	GGGG	GGGG	GGGG	GGGG	GGGG	GGGG	GGGG	GGGG	GGGG	GGGG	GGGG	GGGG	GGGG	GGGG	GGGG	GGGG	GGGG	GGGG	GGGG	GGGG	GGGG	GGGG	GGGG	GGGG	GGGG	GGGG	GGGG	GGGG	GGGG	GGGG	GGGG	GGGG	GGGG	GGGG	GGGG	GGGG	GGGG	GGGG	GGGG	GGGG	GGGG
PotVar0007181	A	G	AAAG	AAAA	AAAG	AAAG	AAAA	AAGG	AAAA	AAAA	AAAG	AAAG	AAAG	AAAA	AAAA	AAGG	AAAG	AAAA	AAAG	AAAA	AAAG	AAAA	AAAA	AAAA	AAAA	AAAA	AAAG	AAAG	AAAA	AAAG	AAAA	AAGG	AAAA	AAAA	AAAA	AAAA	AAAA	AAAG	AAAG	AAAG	AAAG	AAAA	AAGG	AAAA	AAAG	AAAG	AAAA	AAAA	AAAA
PotVar0007182	T	G	----	----	----	----	----	----	----	----	----	----	----	----	----	----	----	----	----	----	----	----	----	----	----	----	----	----	----	----	----	----	----	----	----	----	----	----	----	----	----	----	----	----	----	----	----	----	----
PotVar0007191	A	G	----	----	----	----	----	----	----	----	----	----	----	----	----	----	----	----	----	----	----	----	----	----	----	----	----	----	----	----	----	----	----	----	----	----	----	----	----	----	----	----	----	----	----	----	----	----	----
PotVar0007194	A	C	----	----	----	----	----	----	----	----	----	----	----	----	----	----	----	----	----	----	----	----	----	----	----	----	----	----	----	----	----	----	----	----	----	----	----	----	----	----	----	----	----	----	----	----	----	----	----
PotVar0007240	A	G	----	----	----	----	----	----	----	----	----	----	----	----	----	----	----	----	----	----	----	----	----	----	----	----	----	----	----	----	----	----	----	----	----	----	----	----	----	----	----	----	----	----	----	----	----	----	----
PotVar0007258	A	G	AGGG	GGGG	AAGG	AAGG	AGGG	AAAG	AGGG	AGGG	GGGG	----	AAGG	AAGG	AAGG	AAGG	AAGG	AGGG	GGGG	AGGG	AAGG	AAAG	GGGG	AAGG	GGGG	GGGG	AAGG	AAGG	GGGG	AGGG	AAGG	AAAG	AGGG	AGGG	GGGG	AGGG	AGGG	GGGG	AAAG	----	GGGG	AGGG	AGGG	AAGG	AAGG	AAGG	AAGG	AGGG	GGGG
PotVar0007275	T	C	TCCC	CCCC	TCCC	CCCC	CCCC	CCCC	TCCC	TCCC	TCCC	TCCC	CCCC	CCCC	CCCC	TCCC	CCCC	CCCC	CCCC	CCCC	CCCC	TCCC	CCCC	CCCC	CCCC	CCCC	CCCC	CCCC	CCCC	CCCC	CCCC	CCCC	CCCC	TCCC	CCCC	TCCC	TCCC	CCCC	CCCC	TCCC	TTCC	TCCC	CCCC	CCCC	CCCC	CCCC	CCCC	CCCC	CCCC
PotVar0007279	A	G	----	----	----	----	----	----	----	----	----	----	----	----	----	----	----	----	----	----	----	----	----	----	----	----	----	----	----	----	----	----	----	----	----	----	----	----	----	----	----	----	----	----	----	----	----	----	----
PotVar0007280	A	G	----	----	----	----	----	----	----	----	----	----	----	----	----	----	----	----	----	----	----	----	----	----	----	----	----	----	----	----	----	----	----	----	----	----	----	----	----	----	----	----	----	----	----	----	----	----	----
PotVar0007300	T	C	TTTT	TTTT	TTTT	TTTT	TTTT	TTTT	TTTT	TTTC	TTTT	TTTC	TTTT	TTTT	TTTT	TTTT	TTTT	TTTT	TTTT	TTTT	TTTT	TTTC	TTTT	TTTT	TTTT	TTTT	TTTT	TTTT	TTTT	TTTT	TTTT	TTTT	TTTT	TTTT	TTTT	TTTC	TTTC	TTTT	TTTT	TTTC	TTTC	TTTC	TTTT	TTTT	TTTT	TTTT	TTTT	TTTT	TTTT
PotVar0007303	A	G	----	----	----	----	----	----	----	----	----	----	----	----	----	----	----	----	----	----	----	----	----	----	----	----	----	----	----	----	----	----	----	----	----	----	----	----	----	----	----	----	----	----	----	----	----	----	----
PotVar0007304	T	C	----	----	----	----	----	----	----	----	----	----	----	----	----	----	----	----	----	----	----	----	----	----	----	----	----	----	----	----	----	----	----	----	----	----	----	----	----	----	----	----	----	----	----	----	----	----	----
PotVar0007312	T	C	TCCC	CCCC	TCCC	CCCC	CCCC	CCCC	TCCC	CCCC	TCCC	CCCC	CCCC	CCCC	CCCC	TCCC	CCCC	CCCC	CCCC	CCCC	CCCC	CCCC	CCCC	CCCC	CCCC	CCCC	CCCC	CCCC	CCCC	CCCC	CCCC	CCCC	CCCC	TCCC	CCCC	CCCC	CCCC	CCCC	CCCC	CCCC	TCCC	CCCC	CCCC	CCCC	CCCC	CCCC	CCCC	CCCC	CCCC
PotVar0007327	A	G	----	----	----	----	----	----	----	----	----	----	----	----	----	----	----	----	----	----	----	----	----	----	----	----	----	----	----	----	----	----	----	----	----	----	----	----	----	----	----	----	----	----	----	----	----	----	----
PotVar0007330	A	C	----	----	----	----	----	----	----	----	----	----	----	----	----	----	----	----	----	----	----	----	----	----	----	----	----	----	----	----	----	----	----	----	----	----	----	----	----	----	----	----	----	----	----	----	----	----	----
PotVar0007333	A	G	----	----	----	----	----	----	----	----	----	----	----	----	----	----	----	----	----	----	----	----	----	----	----	----	----	----	----	----	----	----	----	----	----	----	----	----	----	----	----	----	----	----	----	----	----	----	----
PotVar0007348	T	G	TTTT	TTTT	TTTT	TTTT	TTTT	TTTT	TTTT	TTTT	TTTT	TTTT	TTTT	TTTT	TTTT	TTTT	TTTT	TTTT	TTTT	TTTT	TTTT	TTTT	TTTT	TTTT	TTTT	TTTT	TTTT	TTTT	TTTT	TTTT	TTTT	TTTT	TTTT	TTTT	TTTT	TTTT	TTTT	TTTT	TTTT	TTTT	TTTT	TTTT	TTTT	TTTT	TTTT	TTTT	TTTT	TTTT	TTTT
PotVar0007373	A	G	----	----	----	----	----	----	----	----	----	----	----	----	----	----	----	----	----	----	----	----	----	----	----	----	----	----	----	----	----	----	----	----	----	----	----	----	----	----	----	----	----	----	----	----	----	----	----
PotVar0007387	T	C	----	----	----	----	----	----	----	----	----	----	----	----	----	----	----	----	----	----	----	----	----	----	----	----	----	----	----	----	----	----	----	----	----	----	----	----	----	----	----	----	----	----	----	----	----	----	----
PotVar0007394	A	G	AGGG	GGGG	AGGG	GGGG	GGGG	GGGG	AGGG	GGGG	AGGG	GGGG	GGGG	GGGG	GGGG	AGGG	GGGG	GGGG	GGGG	GGGG	GGGG	GGGG	GGGG	GGGG	GGGG	GGGG	GGGG	GGGG	GGGG	GGGG	GGGG	GGGG	GGGG	AGGG	GGGG	GGGG	GGGG	GGGG	GGGG	GGGG	AGGG	GGGG	GGGG	GGGG	GGGG	GGGG	GGGG	GGGG	GGGG
PotVar0007417	T	C	TTTT	TTTT	TTTT	TTTC	TTTT	TTTC	TTTT	TTTC	TTTT	TTTT	TTTT	TTTT	TTTC	TCCC	TTTT	TTTC	TTTT	TTTC	TTTC	TTTC	TTTT	TTTT	TTTT	TTTT	TTCC	TTCC	TTTT	TTTT	TTTT	TTTT	TTTT	TTTC	TTTT	TTTC	TTTT	TTTT	TTTC	TTTC	TTTT	TTTT	TTTT	TTTT	TTTT	TTTT	TTTC	TTTC	TTTT
PotVar0007437	T	C	TTTC	TTTT	TTTC	TTTT	TTTC	TTCC	TTTC	TCCC	TTTT	TTTC	TTTT	TTTC	TTCC	TTTC	TTCC	TTTC	TTCC	TTTC	TCCC	TTTT	TTTC	TTCC	TCCC	TTTC	TTTT	TTTT	TTTC	TTTC	TTCC	TTTC	TTTT	TTTT	TCCC	TTTC	TTTT	TTTC	TTCC	TTTT	TTTC	TCCC	TTCC	TTTC	TTTC	TTCC	TTTC	TTTT	TTTC
PotVar0007448	T	C	TCCC	CCCC	CCCC	CCCC	CCCC	CCCC	CCCC	CCCC	CCCC	CCCC	CCCC	TCCC	TTCC	CCCC	CCCC	CCCC	TTCC	CCCC	TCCC	CCCC	CCCC	----	CCCC	CCCC	CCCC	CCCC	CCCC	----	CCCC	CCCC	CCCC	CCCC	CCCC	CCCC	CCCC	TCCC	TTCC	CCCC	CCCC	TCCC	CCCC	CCCC	CCCC	TCCC	CCCC	CCCC	TCCC
PotVar0007449	A	C	AAAA	AAAA	AAAA	AAAA	AAAA	AAAA	AAAA	AAAA	AAAA	AAAA	AAAA	AAAA	AAAA	AAAA	AAAA	AAAA	AAAA	AAAA	AAAA	AAAA	AAAA	AAAA	AAAA	AAAA	AAAA	AAAA	AAAA	AAAA	AAAA	AAAA	AAAA	AAAA	AAAA	AAAA	AAAA	AAAA	AAAA	AAAA	AAAA	AAAA	AAAA	AAAA	AAAA	AAAA	AAAA	AAAA	AAAA
PotVar0007465	A	C	CCCC	CCCC	ACCC	CCCC	CCCC	AACC	CCCC	ACCC	CCCC	ACCC	CCCC	CCCC	CCCC	ACCC	ACCC	ACCC	CCCC	CCCC	ACCC	CCCC	CCCC	ACCC	AAAC	ACCC	CCCC	CCCC	ACCC	ACCC	ACCC	ACCC	CCCC	CCCC	AAAC	ACCC	CCCC	CCCC	CCCC	CCCC	ACCC	AACC	ACCC	CCCC	CCCC	ACCC	ACCC	CCCC	CCCC
PotVar0007466	T	C	----	----	----	----	----	----	----	----	----	----	----	----	----	----	----	----	----	----	----	----	----	----	----	----	----	----	----	----	----	----	----	----	----	----	----	----	----	----	----	----	----	----	----	----	----	----	----
PotVar0007470	A	G	----	----	----	----	----	----	----	----	----	----	----	----	----	----	----	----	----	----	----	----	----	----	----	----	----	----	----	----	----	----	----	----	----	----	----	----	----	----	----	----	----	----	----	----	----	----	----
PotVar0007472	T	C	----	----	----	----	----	----	----	----	----	----	----	----	----	----	----	----	----	----	----	----	----	----	----	----	----	----	----	----	----	----	----	----	----	----	----	----	----	----	----	----	----	----	----	----	----	----	----
PotVar0007473	T	C	----	----	----	----	----	----	----	----	----	----	----	----	----	----	----	----	----	----	----	----	----	----	----	----	----	----	----	----	----	----	----	----	----	----	----	----	----	----	----	----	----	----	----	----	----	----	----
PotVar0007492	T	G	----	----	----	----	----	----	----	----	----	----	----	----	----	----	----	----	----	----	----	----	----	----	----	----	----	----	----	----	----	----	----	----	----	----	----	----	----	----	----	----	----	----	----	----	----	----	----
PotVar0007495	T	C	----	----	----	----	----	----	----	----	----	----	----	----	----	----	----	----	----	----	----	----	----	----	----	----	----	----	----	----	----	----	----	----	----	----	----	----	----	----	----	----	----	----	----	----	----	----	----
PotVar0007531	T	C	----	----	----	----	----	----	----	----	----	----	----	----	----	----	----	----	----	----	----	----	----	----	----	----	----	----	----	----	----	----	----	----	----	----	----	----	----	----	----	----	----	----	----	----	----	----	----
PotVar0007532	T	C	TCCC	CCCC	TCCC	TCCC	TCCC	TTCC	TCCC	TTTC	CCCC	TCCC	TCCC	TCCC	----	TCCC	TTCC	TCCC	TTCC	TTCC	TTTC	CCCC	TTCC	TTCC	TTTC	TCCC	TTCC	TTCC	TCCC	----	TTCC	TCCC	TCCC	CCCC	TTTC	TCCC	CCCC	TCCC	TTCC	CCCC	TTCC	TTTC	TTCC	TCCC	TCCC	TTCC	TCCC	TCCC	TCCC
PotVar0007541	T	C	----	----	----	----	----	----	----	----	----	----	----	----	----	----	----	----	----	----	----	----	----	----	----	----	----	----	----	----	----	----	----	----	----	----	----	----	----	----	----	----	----	----	----	----	----	----	----
PotVar0007545	A	G	----	----	----	----	----	----	----	----	----	----	----	----	----	----	----	----	----	----	----	----	----	----	----	----	----	----	----	----	----	----	----	----	----	----	----	----	----	----	----	----	----	----	----	----	----	----	----
PotVar0007554	T	G	----	----	----	----	----	----	----	----	----	----	----	----	----	----	----	----	----	----	----	----	----	----	----	----	----	----	----	----	----	----	----	----	----	----	----	----	----	----	----	----	----	----	----	----	----	----	----
PotVar0007556	A	G	----	----	----	----	----	----	----	----	----	----	----	----	----	----	----	----	----	----	----	----	----	----	----	----	----	----	----	----	----	----	----	----	----	----	----	----	----	----	----	----	----	----	----	----	----	----	----
PotVar0007596	A	G	----	----	----	----	----	----	----	----	----	----	----	----	----	----	----	----	----	----	----	----	----	----	----	----	----	----	----	----	----	----	----	----	----	----	----	----	----	----	----	----	----	----	----	----	----	----	----
PotVar0007597	A	G	AAAG	AAAA	AAAA	AAAA	AAAG	AAAA	AAAG	AAGG	AAAA	AAAA	AAAA	AAAG	AAGG	AAAA	AAAG	AAAA	AAGG	AAAG	AAGG	AAAA	AAAG	----	AAAA	AAAA	AAAA	AAAA	AAAA	AAAG	AAAG	AAAA	AAAA	AAAA	AAAA	AAAA	AAAA	AAAG	AAGG	AAAA	AAAG	AAAG	AAAG	AAAG	AAAG	AAAG	AAAA	AAAA	AAAG
PotVar0007598	T	G	----	----	----	----	----	----	----	----	----	----	----	----	----	----	----	----	----	----	----	----	----	----	----	----	----	----	----	----	----	----	----	----	----	----	----	----	----	----	----	----	----	----	----	----	----	----	----
PotVar0007606	T	C	TTTT	TTTT	TTTT	TTTT	TTTC	TTTT	TTTT	TTCC	TTTT	TTTT	TTTT	TTTT	TTTT	TTTT	TTTC	TTTT	TTTT	TTTT	TTTT	TTTT	TTTT	TTTT	TTTT	TTTT	TTTT	TTTT	TTTT	TTTT	TTTT	TTTT	TTTT	TTTT	TTTT	TTTT	TTTT	TTTT	TTTT	TTTT	TTTT	TTTT	TTTC	TTTT	TTTC	TTTT	TTTT	TTTT	TTTT
PotVar0007608	A	G	----	----	----	----	----	----	----	----	----	----	----	----	----	----	----	----	----	----	----	----	----	----	----	----	----	----	----	----	----	----	----	----	----	----	----	----	----	----	----	----	----	----	----	----	----	----	----
PotVar0007610	T	C	----	----	----	----	----	----	----	----	----	----	----	----	----	----	----	----	----	----	----	----	----	----	----	----	----	----	----	----	----	----	----	----	----	----	----	----	----	----	----	----	----	----	----	----	----	----	----
PotVar0007613	A	G	GGGG	GGGG	GGGG	GGGG	AGGG	GGGG	GGGG	AAGG	GGGG	GGGG	GGGG	GGGG	GGGG	GGGG	AGGG	GGGG	AGGG	GGGG	GGGG	GGGG	GGGG	GGGG	GGGG	GGGG	GGGG	GGGG	GGGG	GGGG	GGGG	GGGG	GGGG	GGGG	GGGG	GGGG	GGGG	GGGG	GGGG	GGGG	GGGG	AGGG	AGGG	GGGG	AGGG	GGGG	GGGG	GGGG	GGGG
PotVar0007623	T	C	TTTT	TTTT	TTTT	TTTT	TTTT	TTTT	TTTT	TTTT	TTTT	TTTT	TTTT	TTTT	TTTT	TTTT	TTTT	TTTT	TTTT	TTTT	TTTT	TTTT	TTTT	TTTT	TTTT	TTTT	TTTT	TTTT	TTTT	TTTT	TTTT	TTTT	TTTT	TTTT	TTTT	TTTT	TTTT	TTTT	TTTT	TTTT	TTTT	TTTT	TTTT	TTTT	TTTT	TTTC	TTTT	TTTT	TTTT
PotVar0007624	T	C	TTTT	TTTT	TTTT	TTTC	TTTT	TTTT	TTTC	TTTT	TTTT	TTTT	TTTT	TTTT	TTTT	TTTT	TTTT	TTTT	TTTT	TTTT	TTTT	TTTT	TTTT	TTTC	TTTC	TTTT	TTTC	TTTC	TTTT	TTTT	TTTT	TTTT	TTTC	TTTT	TTTC	TTTT	TTCC	TTTT	TTTC	TTTT	TTTT	TTTT	TTTT	TTTC	TTTC	TTTT	TTTT	TTTT	TTTT
PotVar0007631	T	C	CCCC	CCCC	CCCC	CCCC	CCCC	CCCC	TCCC	CCCC	CCCC	CCCC	CCCC	CCCC	CCCC	CCCC	CCCC	CCCC	CCCC	CCCC	CCCC	CCCC	CCCC	CCCC	CCCC	CCCC	TCCC	TCCC	CCCC	CCCC	CCCC	CCCC	CCCC	CCCC	CCCC	CCCC	CCCC	CCCC	TCCC	CCCC	CCCC	CCCC	CCCC	TCCC	TCCC	CCCC	CCCC	CCCC	CCCC
PotVar0007646	T	C	CCCC	CCCC	TCCC	CCCC	TCCC	TCCC	CCCC	CCCC	CCCC	TCCC	TCCC	CCCC	CCCC	CCCC	CCCC	CCCC	CCCC	TTCC	CCCC	CCCC	CCCC	CCCC	TCCC	TCCC	TCCC	TCCC	CCCC	CCCC	CCCC	CCCC	TTCC	CCCC	TCCC	CCCC	CCCC	CCCC	CCCC	CCCC	CCCC	CCCC	CCCC	CCCC	CCCC	CCCC	CCCC	TCCC	CCCC
PotVar0007648	T	C	TTTT	TTTT	TTTT	TTTT	TTTT	TTTT	TTTT	TTTT	TTTT	TTTT	TTTT	TTTT	TTTT	TTTT	TTTT	TTTT	TTTT	TTTT	TTTT	TTTT	TTTT	TTTT	TTTT	TTTT	TTTT	TTTT	TTTT	TTTT	TTTT	TTTT	TTTT	TTTT	TTTT	TTTT	TTTC	TTTT	TTTT	TTTT	TTTT	TTTT	TTTT	TTTT	TTTT	TTTT	TTTT	TTTT	TTTT
PotVar0007652	T	C	----	----	----	----	----	----	----	----	----	----	----	----	----	----	----	----	----	----	----	----	----	----	----	----	----	----	----	----	----	----	----	----	----	----	----	----	----	----	----	----	----	----	----	----	----	----	----
PotVar0007697	T	C	CCCC	CCCC	CCCC	CCCC	CCCC	CCCC	CCCC	CCCC	CCCC	CCCC	CCCC	CCCC	CCCC	CCCC	CCCC	CCCC	CCCC	CCCC	CCCC	CCCC	CCCC	CCCC	CCCC	CCCC	CCCC	CCCC	CCCC	CCCC	CCCC	CCCC	CCCC	CCCC	CCCC	CCCC	TCCC	CCCC	CCCC	CCCC	CCCC	CCCC	CCCC	CCCC	CCCC	CCCC	CCCC	CCCC	CCCC
PotVar0007710	A	C	CCCC	CCCC	CCCC	ACCC	CCCC	CCCC	CCCC	CCCC	CCCC	CCCC	CCCC	CCCC	CCCC	CCCC	CCCC	CCCC	CCCC	CCCC	CCCC	CCCC	CCCC	ACCC	ACCC	CCCC	CCCC	CCCC	CCCC	CCCC	CCCC	CCCC	ACCC	CCCC	ACCC	CCCC	CCCC	CCCC	CCCC	CCCC	CCCC	AACC	CCCC	CCCC	CCCC	CCCC	CCCC	CCCC	CCCC
PotVar0007721	A	G	AAAA	AAAA	AAGG	AAAA	AAAG	AAAG	AAAA	AAAA	AAAG	AAAG	AAAA	AAAA	AAAG	AAAA	AAAA	AAAG	AAAG	AAAA	AAAA	AAAA	AAAA	AAAG	AAAG	AAAA	AAAA	AAAA	AAAA	AAAA	AAAG	AAAA	AAAA	AAAA	AAAG	AAAA	AAAA	AAAA	AAAA	AAAA	AAAA	AAAA	AAAA	AAAA	AAAG	AAAA	AAAA	AAAG	AAAA
PotVar0007732	A	C	ACCC	AACC	CCCC	AACC	AACC	ACCC	AACC	ACCC	ACCC	CCCC	AACC	AACC	ACCC	AACC	AACC	CCCC	ACCC	ACCC	ACCC	AAAC	AACC	----	ACCC	----	AACC	AACC	----	----	AACC	AACC	ACCC	AACC	ACCC	AACC	AAAC	AACC	AAAA	AACC	AAAA	AACC	ACCC	AAAC	ACCC	AAAA	ACCC	CCCC	AACC
PotVar0007740	T	C	TTTC	TTCC	TTCC	TTCC	TCCC	TTCC	TTCC	TTTC	TTCC	TTTC	TTCC	TTCC	TTCC	TTCC	TTCC	TTTC	TTCC	TTTC	TTTC	TCCC	TTCC	TCCC	TTCC	TTTC	TTCC	TTCC	TTCC	TTTC	TCCC	TTCC	TTTC	TTCC	TTCC	TTCC	TCCC	TTCC	CCCC	TTCC	CCCC	TTTT	TTTC	TCCC	TTCC	CCCC	TTTC	TTTC	TTCC
PotVar0007751	A	G	AAAA	AAAA	AAAA	AAAA	AAAA	AAAA	AAAA	AAAA	AAAA	AAAA	AAAA	AAAA	AAAA	AAAA	AAAA	AAAA	AAAA	AAAA	AAAA	AAAA	AAAA	AAAA	AAAA	AAAG	AAAA	AAAA	AAAG	AAAA	AAAA	AAAA	AAAA	AAAA	AAAA	AAAA	AAAA	AAAA	AAAA	AAAA	AAAA	AAAG	AAAA	AAAA	AAAA	AAAA	AAAA	AAAA	AAAA
PotVar0007753	A	G	GGGG	GGGG	GGGG	GGGG	GGGG	GGGG	GGGG	GGGG	GGGG	GGGG	GGGG	GGGG	GGGG	GGGG	GGGG	GGGG	GGGG	GGGG	GGGG	GGGG	GGGG	GGGG	GGGG	GGGG	GGGG	GGGG	GGGG	GGGG	GGGG	GGGG	GGGG	GGGG	GGGG	GGGG	GGGG	GGGG	GGGG	GGGG	GGGG	GGGG	GGGG	GGGG	GGGG	GGGG	GGGG	GGGG	GGGG
PotVar0007761	T	G	TTTT	TTTT	TTTT	TTTG	TTTG	TTTT	TTTT	TTTG	TTTT	TTTT	TTTT	TTTG	TTTT	TTTG	TTTT	TTTT	TTTT	TTTT	TTTT	TTGG	TTTT	TTTG	TTTT	TTTT	TTTG	TTTG	TTTT	TTTT	TTTG	TTTG	TTTT	TTTT	TTTT	TTGG	TTTG	TTTT	TTTG	TTTT	TTTG	TTTT	TTTT	TTTT	TTTT	TTTG	TTTG	TTTT	TTTT
PotVar0007768	A	C	CCCC	CCCC	CCCC	ACCC	ACCC	CCCC	CCCC	ACCC	CCCC	CCCC	CCCC	ACCC	CCCC	ACCC	CCCC	CCCC	CCCC	CCCC	CCCC	AACC	CCCC	ACCC	CCCC	CCCC	ACCC	ACCC	CCCC	CCCC	ACCC	ACCC	CCCC	CCCC	CCCC	AACC	ACCC	CCCC	ACCC	CCCC	ACCC	CCCC	CCCC	CCCC	CCCC	ACCC	ACCC	CCCC	CCCC
PotVar0007780	A	C	----	----	----	----	----	----	----	----	----	----	----	----	----	----	----	----	----	----	----	----	----	----	----	----	----	----	----	----	----	----	----	----	----	----	----	----	----	----	----	----	----	----	----	----	----	----	----
PotVar0007814	T	C	----	----	----	----	----	----	----	----	----	----	----	----	----	----	----	----	----	----	----	----	----	----	----	----	----	----	----	----	----	----	----	----	----	----	----	----	----	----	----	----	----	----	----	----	----	----	----
PotVar0008021	T	G	----	----	----	----	----	----	----	----	----	----	----	----	----	----	----	----	----	----	----	----	----	----	----	----	----	----	----	----	----	----	----	----	----	----	----	----	----	----	----	----	----	----	----	----	----	----	----
PotVar0008028	T	C	TTTT	TTTT	TTTT	TTTT	TTTT	TTTT	TTTC	TTTT	TTTT	TTTT	TTTT	TTTT	TTTT	TTTT	TTTT	TTTT	TTTT	TTTT	TTTT	TTTT	TTTT	TTTT	TTTT	TTTT	TTTC	TTTC	TTTT	TTTT	TTTT	TTTT	TTTT	TTTT	TTTT	TTTT	TTTT	TTTT	TTTC	TTTT	TTTT	TTTT	TTTT	TTTC	TTTC	TTTT	TTTT	TTTT	TTTT
PotVar0008045	A	G	GGGG	GGGG	GGGG	GGGG	GGGG	GGGG	GGGG	GGGG	GGGG	GGGG	GGGG	GGGG	GGGG	GGGG	GGGG	GGGG	GGGG	GGGG	GGGG	GGGG	GGGG	GGGG	GGGG	GGGG	GGGG	GGGG	GGGG	GGGG	GGGG	GGGG	GGGG	GGGG	GGGG	GGGG	GGGG	GGGG	GGGG	GGGG	GGGG	GGGG	GGGG	GGGG	GGGG	AGGG	GGGG	GGGG	GGGG
PotVar0008054	A	C	CCCC	CCCC	CCCC	CCCC	CCCC	CCCC	CCCC	CCCC	CCCC	CCCC	CCCC	CCCC	CCCC	CCCC	CCCC	CCCC	CCCC	CCCC	CCCC	CCCC	CCCC	CCCC	CCCC	CCCC	CCCC	CCCC	CCCC	CCCC	CCCC	CCCC	CCCC	CCCC	CCCC	CCCC	CCCC	CCCC	CCCC	CCCC	CCCC	AACC	CCCC	CCCC	CCCC	CCCC	CCCC	CCCC	CCCC
PotVar0008057	T	C	----	----	----	----	----	----	----	----	----	----	----	----	----	----	----	----	----	----	----	----	----	----	----	----	----	----	----	----	----	----	----	----	----	----	----	----	----	----	----	----	----	----	----	----	----	----	----
PotVar0008065	T	C	----	----	----	----	----	----	----	----	----	----	----	----	----	----	----	----	----	----	----	----	----	----	----	----	----	----	----	----	----	----	----	----	----	----	----	----	----	----	----	----	----	----	----	----	----	----	----
PotVar0008073	A	C	----	----	----	----	----	----	----	----	----	----	----	----	----	----	----	----	----	----	----	----	----	----	----	----	----	----	----	----	----	----	----	----	----	----	----	----	----	----	----	----	----	----	----	----	----	----	----
PotVar0008075	A	G	AAAA	AAAG	AAAA	AAGG	AAAG	AAAA	AAAG	AAAG	AAAA	AAAA	AAAA	AAAG	AAAA	AAAA	AAAA	AAAA	AAAA	AAAA	AAAA	AAGG	AAAA	AAAG	AAAA	AAAA	AAGG	AAGG	AAAA	AAAA	AAAG	AAAG	AAAG	AAAA	AAAA	AAGG	AGGG	AAAA	AAGG	AAAG	AAAG	----	AAAA	AAAG	AAAG	AAGG	AAAG	AAAA	AAAA
PotVar0008080	A	G	----	----	----	----	----	----	----	----	----	----	----	----	----	----	----	----	----	----	----	----	----	----	----	----	----	----	----	----	----	----	----	----	----	----	----	----	----	----	----	----	----	----	----	----	----	----	----
PotVar0008082	A	G	AAAA	AAAA	AAAA	AAGG	AAAG	AAAA	AAAA	AAAG	AAAA	AAAA	AAAA	AAAG	AAAA	AAAA	AAAA	AAAA	AAAA	AAAA	AAAA	AAGG	AAAA	AAAG	AAAA	AAAA	AAAG	AAAG	AAAA	AAAA	AAAG	AAAG	AAAG	AAAA	AAAA	AAGG	AAAG	AAAA	AAAG	AAAA	AAAG	AAAA	AAAA	AAAA	AAAA	AAAG	AAAG	AAAA	AAAA
PotVar0008084	A	C	----	----	----	----	----	----	----	----	----	----	----	----	----	----	----	----	----	----	----	----	----	----	----	----	----	----	----	----	----	----	----	----	----	----	----	----	----	----	----	----	----	----	----	----	----	----	----
PotVar0008085	T	C	----	----	----	----	----	----	----	----	----	----	----	----	----	----	----	----	----	----	----	----	----	----	----	----	----	----	----	----	----	----	----	----	----	----	----	----	----	----	----	----	----	----	----	----	----	----	----
PotVar0008088	T	C	----	----	----	----	----	----	----	----	----	----	----	----	----	----	----	----	----	----	----	----	----	----	----	----	----	----	----	----	----	----	----	----	----	----	----	----	----	----	----	----	----	----	----	----	----	----	----
PotVar0008090	A	G	AAAA	AAAA	AAGG	AAAA	AAAG	AAAG	AAAA	AAAA	AAAG	AAAG	AAAA	AAAA	AAAG	AAAA	AAAA	AAAG	AAAG	AAAA	AAAA	AAAA	AAAA	AAAG	AAAG	AAAA	AAAA	AAAA	AAAA	AAAA	AAAG	AAAA	AAAA	AAAA	AAAG	AAAA	AAAA	AAAA	AAAA	AAAA	AAAA	AAAA	AAAA	AAAA	AAAG	AAAA	AAAA	AAAG	AAAA
PotVar0008099	A	G	AAAA	AAAG	AAAA	AAAA	AAAA	AAAA	AAAA	AAAA	AAAA	AAAA	AAAA	AAAA	AAGG	AAAA	AAAG	AAAA	AAAA	AAAA	AAAG	AAAA	AAAG	AAAG	AAAA	AAAA	AAAA	AAAA	AAAA	AAAA	AAAG	AAAA	AAAA	AAAA	AAAA	AAAA	AAAA	AAAA	AAAG	AAAA	AAAA	AAAA	AAAA	AAAG	AAAA	AAAG	AAAA	AAAA	AAAA
PotVar0008100	A	C	----	----	----	----	----	----	----	----	----	----	----	----	----	----	----	----	----	----	----	----	----	----	----	----	----	----	----	----	----	----	----	----	----	----	----	----	----	----	----	----	----	----	----	----	----	----	----
PotVar0008106	T	C	----	----	----	----	----	----	----	----	----	----	----	----	----	----	----	----	----	----	----	----	----	----	----	----	----	----	----	----	----	----	----	----	----	----	----	----	----	----	----	----	----	----	----	----	----	----	----
PotVar0008112	T	C	----	----	----	----	----	----	----	----	----	----	----	----	----	----	----	----	----	----	----	----	----	----	----	----	----	----	----	----	----	----	----	----	----	----	----	----	----	----	----	----	----	----	----	----	----	----	----
PotVar0008113	A	G	AAAA	AAAA	AAAA	AAAA	AAAG	AAAA	AAAA	AAAA	AAAA	AAAA	AAAA	AAAA	AAAA	AAAA	AAAA	AAAA	AAAA	AAAA	AAAA	AAAA	AAAA	AAAA	AAAA	AAAA	AAAA	AAAA	AAAA	AAAA	AAAA	AAAA	AAAA	AAAA	AAAA	AAAA	AAAA	AAAA	AAAA	AAAA	AAAA	AAAA	AAAA	AAAA	AAAA	AAAA	AAAA	AAAA	AAAA
PotVar0008115	T	C	CCCC	TCCC	CCCC	TCCC	TCCC	TTCC	TCCC	TTCC	CCCC	TCCC	TCCC	CCCC	CCCC	CCCC	CCCC	TCCC	TTCC	TCCC	CCCC	TTCC	CCCC	CCCC	TTCC	CCCC	TCCC	TCCC	CCCC	CCCC	TCCC	CCCC	TCCC	TCCC	TTCC	TTCC	TCCC	TCCC	TCCC	CCCC	TCCC	CCCC	CCCC	CCCC	CCCC	TTCC	TCCC	CCCC	CCCC
PotVar0008116	A	G	----	----	----	----	----	----	----	----	----	----	----	----	----	----	----	----	----	----	----	----	----	----	----	----	----	----	----	----	----	----	----	----	----	----	----	----	----	----	----	----	----	----	----	----	----	----	----
PotVar0008117	A	G	GGGG	GGGG	GGGG	GGGG	GGGG	AAGG	GGGG	GGGG	GGGG	AGGG	GGGG	GGGG	GGGG	GGGG	GGGG	GGGG	AGGG	AGGG	GGGG	AGGG	GGGG	GGGG	AGGG	GGGG	GGGG	GGGG	GGGG	GGGG	AGGG	GGGG	AGGG	GGGG	AGGG	AGGG	GGGG	GGGG	GGGG	GGGG	GGGG	GGGG	GGGG	GGGG	GGGG	AGGG	AGGG	GGGG	GGGG
PotVar0008128	A	G	GGGG	GGGG	GGGG	GGGG	GGGG	GGGG	GGGG	GGGG	GGGG	GGGG	GGGG	GGGG	GGGG	GGGG	GGGG	GGGG	GGGG	GGGG	GGGG	GGGG	GGGG	GGGG	GGGG	GGGG	GGGG	GGGG	GGGG	GGGG	GGGG	GGGG	GGGG	GGGG	GGGG	GGGG	GGGG	GGGG	GGGG	GGGG	GGGG	GGGG	GGGG	GGGG	GGGG	GGGG	GGGG	GGGG	GGGG
PotVar0008146	T	G	GGGG	GGGG	GGGG	GGGG	GGGG	GGGG	GGGG	GGGG	GGGG	GGGG	GGGG	GGGG	GGGG	GGGG	GGGG	GGGG	GGGG	GGGG	GGGG	GGGG	GGGG	GGGG	GGGG	GGGG	GGGG	GGGG	GGGG	GGGG	GGGG	GGGG	GGGG	GGGG	GGGG	GGGG	GGGG	GGGG	GGGG	GGGG	GGGG	TGGG	GGGG	GGGG	GGGG	GGGG	GGGG	GGGG	GGGG
PotVar0008149	A	G	----	----	----	----	----	----	----	----	----	----	----	----	----	----	----	----	----	----	----	----	----	----	----	----	----	----	----	----	----	----	----	----	----	----	----	----	----	----	----	----	----	----	----	----	----	----	----
PotVar0008184	A	G	AAGG	AAAA	AAAG	AAAG	AAAA	AAAA	AAAG	AAAA	AAAA	AAAA	AAAA	AAGG	AAAA	AAAA	AGGG	AAAG	AAAA	AAAA	AAAA	AAAG	AAAG	AAAG	AAGG	AAAA	AAAA	AAAA	AAAG	AAAG	AAAA	AAAA	AAAA	AAAA	AAGG	AAAG	AAGG	AAAA	AAAA	AAGG	AAAA	AAAA	AAAA	AAAG	AAAG	AAAA	AAAG	AAAG	AAAA
PotVar0008194	A	C	CCCC	CCCC	ACCC	ACCC	ACCC	CCCC	CCCC	CCCC	ACCC	CCCC	CCCC	CCCC	ACCC	CCCC	CCCC	ACCC	CCCC	ACCC	AAAC	CCCC	ACCC	AACC	ACCC	ACCC	CCCC	CCCC	ACCC	ACCC	CCCC	CCCC	ACCC	ACCC	ACCC	CCCC	CCCC	CCCC	ACCC	ACCC	CCCC	ACCC	CCCC	CCCC	CCCC	ACCC	CCCC	CCCC	CCCC
PotVar0008207	T	G	----	----	----	----	----	----	----	----	----	----	----	----	----	----	----	----	----	----	----	----	----	----	----	----	----	----	----	----	----	----	----	----	----	----	----	----	----	----	----	----	----	----	----	----	----	----	----
PotVar0008219	T	C	TCCC	CCCC	TTCC	TCCC	TCCC	----	TCCC	TCCC	TTCC	TCCC	TCCC	TCCC	TCCC	TTCC	CCCC	TCCC	CCCC	TTTC	TTTC	TCCC	TCCC	TTCC	TCCC	TTCC	TCCC	TCCC	TCCC	TCCC	TTCC	TCCC	TTCC	TCCC	TCCC	CCCC	CCCC	TTCC	TTCC	TCCC	TCCC	TTCC	TTCC	CCCC	TTCC	TTTC	TCCC	CCCC	TTTC
PotVar0008220	A	G	AAGG	AGGG	AGGG	AGGG	AGGG	GGGG	AGGG	GGGG	GGGG	GGGG	GGGG	AAGG	GGGG	GGGG	AAAG	AGGG	AAGG	GGGG	GGGG	AAGG	AGGG	AGGG	AAGG	GGGG	GGGG	GGGG	AGGG	AGGG	GGGG	AGGG	AGGG	GGGG	AAGG	AGGG	AAGG	AGGG	GGGG	AAGG	GGGG	GGGG	GGGG	AAGG	AGGG	GGGG	AGGG	AGGG	GGGG
PotVar0008237	T	C	TCCC	TTCC	TCCC	TCCC	TCCC	TTCC	TTCC	TTCC	TCCC	TTCC	TTCC	CCCC	CCCC	CCCC	CCCC	TTCC	TTTC	TCCC	CCCC	TTCC	TTCC	----	TCCC	TTCC	TTTC	TTTC	TTCC	TCCC	TCCC	CCCC	TTCC	TTTC	TCCC	----	TTCC	TCCC	TCCC	TCCC	TTCC	TTCC	TCCC	TTCC	TCCC	TCCC	TTCC	TCCC	TCCC
PotVar0008238	T	G	----	----	----	----	----	----	----	----	----	----	----	----	----	----	----	----	----	----	----	----	----	----	----	----	----	----	----	----	----	----	----	----	----	----	----	----	----	----	----	----	----	----	----	----	----	----	----
PotVar0008239	T	C	----	----	----	----	----	----	----	----	----	----	----	----	----	----	----	----	----	----	----	----	----	----	----	----	----	----	----	----	----	----	----	----	----	----	----	----	----	----	----	----	----	----	----	----	----	----	----
PotVar0008242	T	C	----	----	----	----	----	----	----	----	----	----	----	----	----	----	----	----	----	----	----	----	----	----	----	----	----	----	----	----	----	----	----	----	----	----	----	----	----	----	----	----	----	----	----	----	----	----	----
PotVar0008243	A	G	GGGG	AGGG	GGGG	AGGG	AGGG	GGGG	GGGG	AGGG	AGGG	AGGG	AGGG	AGGG	AAGG	AAGG	AGGG	GGGG	GGGG	GGGG	AGGG	GGGG	GGGG	GGGG	GGGG	GGGG	GGGG	GGGG	GGGG	GGGG	AGGG	AAGG	GGGG	GGGG	GGGG	GGGG	GGGG	GGGG	AGGG	GGGG	AGGG	GGGG	AGGG	GGGG	GGGG	GGGG	GGGG	AAGG	GGGG
PotVar0008247	A	G	GGGG	GGGG	GGGG	GGGG	GGGG	AGGG	GGGG	AGGG	GGGG	GGGG	GGGG	AGGG	GGGG	AGGG	GGGG	GGGG	GGGG	AAGG	GGGG	GGGG	GGGG	GGGG	GGGG	GGGG	GGGG	GGGG	GGGG	----	AGGG	AGGG	GGGG	GGGG	GGGG	GGGG	GGGG	GGGG	AGGG	GGGG	AGGG	AGGG	GGGG	GGGG	AGGG	AGGG	AGGG	GGGG	GGGG
PotVar0008262	A	C	----	----	----	----	----	----	----	----	----	----	----	----	----	----	----	----	----	----	----	----	----	----	----	----	----	----	----	----	----	----	----	----	----	----	----	----	----	----	----	----	----	----	----	----	----	----	----
PotVar0008263	T	C	TCCC	CCCC	CCCC	CCCC	TCCC	TCCC	CCCC	CCCC	TCCC	TCCC	CCCC	TTTC	CCCC	TTCC	CCCC	CCCC	TCCC	TTCC	CCCC	TTCC	CCCC	----	TCCC	CCCC	CCCC	CCCC	CCCC	TCCC	TTCC	TCCC	TTCC	CCCC	TCCC	TTCC	TTCC	TCCC	TCCC	CCCC	TCCC	TTTC	TTCC	CCCC	TTTC	TCCC	CCCC	CCCC	TTTC
PotVar0008279	A	G	AAGG	AAGG	GGGG	AGGG	AGGG	GGGG	AAGG	AAGG	AGGG	AAGG	AGGG	GGGG	GGGG	AGGG	GGGG	AAGG	AGGG	GGGG	GGGG	AGGG	GGGG	AGGG	AAGG	AGGG	AGGG	AGGG	AGGG	GGGG	AGGG	GGGG	AAGG	AAGG	AAGG	AAGG	AGGG	AAGG	AGGG	GGGG	AGGG	GGGG	AAGG	AGGG	AGGG	AGGG	GGGG	GGGG	AAAG
PotVar0008281	T	G	----	----	----	----	----	----	----	----	----	----	----	----	----	----	----	----	----	----	----	----	----	----	----	----	----	----	----	----	----	----	----	----	----	----	----	----	----	----	----	----	----	----	----	----	----	----	----
PotVar0008293	T	C	CCCC	CCCC	TCCC	CCCC	CCCC	TTCC	CCCC	CCCC	TCCC	TCCC	TCCC	CCCC	CCCC	CCCC	CCCC	CCCC	TCCC	TCCC	CCCC	CCCC	TTCC	CCCC	CCCC	TCCC	TTCC	TTCC	TCCC	----	CCCC	CCCC	CCCC	TCCC	CCCC	CCCC	TCCC	CCCC	CCCC	TCCC	TCCC	CCCC	CCCC	TCCC	TCCC	CCCC	TTCC	TCCC	CCCC
PotVar0008299	A	C	ACCC	ACCC	ACCC	ACCC	AACC	ACCC	ACCC	ACCC	ACCC	ACCC	AACC	CCCC	AACC	AACC	ACCC	CCCC	CCCC	CCCC	ACCC	ACCC	CCCC	CCCC	CCCC	ACCC	ACCC	ACCC	CCCC	CCCC	ACCC	AACC	CCCC	CCCC	CCCC	CCCC	CCCC	ACCC	ACCC	CCCC	ACCC	CCCC	ACCC	CCCC	CCCC	ACCC	CCCC	AACC	CCCC
PotVar0008301	A	G	----	----	----	----	----	----	----	----	----	----	----	----	----	----	----	----	----	----	----	----	----	----	----	----	----	----	----	----	----	----	----	----	----	----	----	----	----	----	----	----	----	----	----	----	----	----	----
PotVar0008315	A	G	----	----	----	----	----	----	----	----	----	----	----	----	----	----	----	----	----	----	----	----	----	----	----	----	----	----	----	----	----	----	----	----	----	----	----	----	----	----	----	----	----	----	----	----	----	----	----
PotVar0008323	A	C	ACCC	CCCC	CCCC	CCCC	CCCC	CCCC	CCCC	CCCC	ACCC	ACCC	CCCC	CCCC	CCCC	ACCC	CCCC	CCCC	CCCC	CCCC	CCCC	CCCC	CCCC	ACCC	ACCC	CCCC	CCCC	CCCC	CCCC	CCCC	AACC	CCCC	ACCC	CCCC	ACCC	CCCC	ACCC	ACCC	CCCC	CCCC	CCCC	ACCC	AACC	CCCC	AACC	CCCC	CCCC	CCCC	AACC
PotVar0008325	T	C	TCCC	TTCC	CCCC	TCCC	TCCC	CCCC	TTCC	TTCC	CCCC	TCCC	TCCC	CCCC	CCCC	CCCC	CCCC	TTCC	TTCC	CCCC	CCCC	TTCC	CCCC	CCCC	TCCC	TCCC	TCCC	TCCC	TCCC	CCCC	CCCC	CCCC	TTCC	TTCC	TCCC	TTCC	TCCC	TCCC	TCCC	CCCC	TCCC	CCCC	TCCC	TCCC	CCCC	TCCC	CCCC	CCCC	TCCC
PotVar0008343	T	C	----	----	----	----	----	----	----	----	----	----	----	----	----	----	----	----	----	----	----	----	----	----	----	----	----	----	----	----	----	----	----	----	----	----	----	----	----	----	----	----	----	----	----	----	----	----	----
PotVar0008344	A	G	----	----	----	----	----	----	----	----	----	----	----	----	----	----	----	----	----	----	----	----	----	----	----	----	----	----	----	----	----	----	----	----	----	----	----	----	----	----	----	----	----	----	----	----	----	----	----
PotVar0008356	A	C	----	----	----	----	----	----	----	----	----	----	----	----	----	----	----	----	----	----	----	----	----	----	----	----	----	----	----	----	----	----	----	----	----	----	----	----	----	----	----	----	----	----	----	----	----	----	----
PotVar0008358	T	C	----	----	----	----	----	----	----	----	----	----	----	----	----	----	----	----	----	----	----	----	----	----	----	----	----	----	----	----	----	----	----	----	----	----	----	----	----	----	----	----	----	----	----	----	----	----	----
PotVar0008370	A	G	----	----	----	----	----	----	----	----	----	----	----	----	----	----	----	----	----	----	----	----	----	----	----	----	----	----	----	----	----	----	----	----	----	----	----	----	----	----	----	----	----	----	----	----	----	----	----
PotVar0008380	T	C	TTTT	TTTT	TTCC	TTTC	TTTC	TCCC	TTTT	TTTC	TTCC	TTTC	TTTC	TTCC	TTCC	TTTC	TTTC	TTTC	TCCC	CCCC	TCCC	TTCC	CCCC	----	TTCC	TTCC	TTCC	TTCC	TTCC	TCCC	TTTC	TTCC	TTCC	TTCC	TTCC	TTTC	TTCC	TTTC	TTCC	TCCC	TTCC	TCCC	TTTT	TCCC	TTCC	TTCC	TCCC	TTCC	TTTC
PotVar0008381	A	G	----	----	----	----	----	----	----	----	----	----	----	----	----	----	----	----	----	----	----	----	----	----	----	----	----	----	----	----	----	----	----	----	----	----	----	----	----	----	----	----	----	----	----	----	----	----	----
PotVar0008383	A	C	AAAA	AAAA	AAAA	AAAA	AAAA	AAAA	AAAA	AAAA	AAAA	AAAA	AAAA	AAAC	AAAA	AAAA	AAAA	AAAA	AAAA	AAAA	AAAA	AAAA	AAAA	AAAA	AAAA	AAAA	AAAA	AAAA	AAAA	AAAA	AAAA	AAAA	AAAA	AAAA	AAAA	AAAA	AAAA	AAAA	AAAA	AAAA	AAAA	AAAA	AAAA	AAAA	AAAA	AAAA	AAAA	AAAA	AAAA
PotVar0008392	A	G	AAAA	AAAA	AAAA	AAAA	AAAA	AAAG	AAAA	AAAA	AAAA	AAAA	AAAA	AAGG	AAAA	AAAG	AAAA	AAAA	AAAG	AAGG	AAAA	AAGG	AAAA	AAAG	AAAA	AAAA	AAAA	AAAA	AAAA	AAAG	AAAA	AAAG	AAAG	AAAA	AAAA	AAAG	AAAG	AAAA	AAAG	AAAA	AAAG	AAGG	AAAA	AAAA	AAAG	AAAG	AAAA	AAAA	AAAG
PotVar0008393	A	C	AAAC	AAAC	AAAC	AAAC	AACC	AAAC	AAAC	AAAC	AAAC	AAAC	AACC	AAAC	AACC	AACC	AAAC	AAAA	AAAA	AAAA	AAAC	AAAC	AAAA	AAAA	AAAA	AAAC	AAAC	AAAC	AAAA	AAAA	AAAC	AACC	AAAA	AAAA	AAAA	AAAC	AAAA	AAAC	AAAC	AAAA	AAAC	AAAA	AAAC	AAAA	AAAA	AAAC	AAAA	AACC	AAAA
PotVar0008400	A	G	AAGG	AGGG	AGGG	AGGG	GGGG	GGGG	AGGG	GGGG	AGGG	AGGG	GGGG	AGGG	GGGG	AGGG	AAGG	AGGG	GGGG	GGGG	GGGG	GGGG	GGGG	AGGG	AGGG	GGGG	GGGG	GGGG	AGGG	AGGG	AAGG	GGGG	AGGG	GGGG	AGGG	GGGG	AGGG	AGGG	GGGG	AGGG	GGGG	AGGG	AAGG	GGGG	AAGG	GGGG	AGGG	GGGG	AAGG
PotVar0008401	A	G	AAAG	AAAG	AGGG	AAGG	AGGG	GGGG	AAAG	AAGG	AGGG	AAGG	AGGG	AGGG	GGGG	AGGG	AAGG	AAAG	AGGG	GGGG	GGGG	AGGG	GGGG	AGGG	AAGG	AGGG	AGGG	AGGG	AAGG	AGGG	AAGG	GGGG	AAGG	AAGG	AAGG	AAGG	AAGG	AAGG	AGGG	AGGG	AGGG	AGGG	AAAG	AGGG	AAGG	AGGG	AGGG	GGGG	AAAG
PotVar0008409	A	G	AGGG	AAGG	GGGG	AGGG	AGGG	GGGG	AAGG	AAGG	GGGG	AGGG	AGGG	GGGG	GGGG	GGGG	GGGG	AAGG	AGGG	GGGG	GGGG	AGGG	GGGG	GGGG	AGGG	AGGG	AGGG	AGGG	AGGG	GGGG	GGGG	GGGG	AGGG	AAGG	AGGG	AAGG	AGGG	AGGG	AGGG	GGGG	AGGG	GGGG	AGGG	AGGG	GGGG	AGGG	GGGG	GGGG	AGGG
PotVar0008442	T	G	----	----	----	----	----	----	----	----	----	----	----	----	----	----	----	----	----	----	----	----	----	----	----	----	----	----	----	----	----	----	----	----	----	----	----	----	----	----	----	----	----	----	----	----	----	----	----
PotVar0008443	A	G	AAAA	AAAA	AAAA	AAAA	AAAA	AAAA	AAAA	AAAG	AAAA	AAAA	AAAA	AAAA	AAAA	AAAA	AAAA	AAAA	AAAG	AAAA	AAAA	AAAG	AAAA	AAAA	AAAA	AAAA	AAAA	AAAA	AAAA	AAAA	AAAA	AAAA	AAAA	AAAA	AAAA	AAAA	AAAA	AAAG	AAAA	AAAA	AAAA	AAAG	AAAA	AAAA	AAAA	AAAA	AAAG	AAAA	AAAA
PotVar0008447	A	G	AAGG	GGGG	AAGG	AAGG	AAGG	AGGG	AGGG	----	AGGG	GGGG	GGGG	AAAG	AAGG	AGGG	AGGG	GGGG	AGGG	AGGG	AAAG	AAGG	AGGG	AAGG	AGGG	GGGG	GGGG	GGGG	GGGG	AAGG	AGGG	AGGG	AGGG	GGGG	AGGG	AGGG	AGGG	AGGG	AAAG	AAGG	GGGG	AAAA	AAGG	GGGG	AGGG	AGGG	AAGG	GGGG	AGGG
PotVar0008448	T	C	----	----	----	----	----	----	----	----	----	----	----	----	----	----	----	----	----	----	----	----	----	----	----	----	----	----	----	----	----	----	----	----	----	----	----	----	----	----	----	----	----	----	----	----	----	----	----
PotVar0008449	A	C	----	----	----	----	----	----	----	----	----	----	----	----	----	----	----	----	----	----	----	----	----	----	----	----	----	----	----	----	----	----	----	----	----	----	----	----	----	----	----	----	----	----	----	----	----	----	----
PotVar0008480	T	C	----	----	----	----	----	----	----	----	----	----	----	----	----	----	----	----	----	----	----	----	----	----	----	----	----	----	----	----	----	----	----	----	----	----	----	----	----	----	----	----	----	----	----	----	----	----	----
PotVar0008494	T	C	TTTC	TCCC	TTTC	TTCC	TTCC	TTTC	TCCC	TTCC	TTTC	TTCC	TCCC	TTTT	TTTC	TTCC	TTTC	TTCC	TTTC	TTTC	TTTC	TTCC	TTTT	----	TTCC	TTCC	TTCC	TTCC	TTTC	TTTT	TTCC	TTCC	TTTC	TTCC	TTCC	TCCC	TTTC	TTCC	TTTC	TTTT	TCCC	TTTT	TTTC	TTCC	TTTT	TCCC	TTTT	TTTC	TTTC
PotVar0008495	A	C	----	----	----	----	----	----	----	----	----	----	----	----	----	----	----	----	----	----	----	----	----	----	----	----	----	----	----	----	----	----	----	----	----	----	----	----	----	----	----	----	----	----	----	----	----	----	----
PotVar0008496	T	G	----	----	----	----	----	----	----	----	----	----	----	----	----	----	----	----	----	----	----	----	----	----	----	----	----	----	----	----	----	----	----	----	----	----	----	----	----	----	----	----	----	----	----	----	----	----	----
PotVar0008504	A	G	AAAA	AAAG	AAAG	AAAA	AAAA	AAAG	AAAA	AAAA	AAAG	AAAA	AAAG	AAAA	AAAG	AAAA	AAGG	AAAG	AAAG	AAAG	AAAA	AAAA	AAGG	AAAA	AAAA	AAAG	----	AGGG	AAGG	AAGG	AAAA	AAAA	AAAA	AAAG	AAAA	AAAA	AAAG	AAAA	AAAA	AAAG	AAAG	AAAA	AAAA	AAAG	AAAG	AAAA	AAGG	AAGG	AAAA
PotVar0008507	T	C	----	----	----	----	----	----	----	----	----	----	----	----	----	----	----	----	----	----	----	----	----	----	----	----	----	----	----	----	----	----	----	----	----	----	----	----	----	----	----	----	----	----	----	----	----	----	----
PotVar0008511	T	C	CCCC	CCCC	CCCC	TCCC	CCCC	CCCC	CCCC	CCCC	TCCC	CCCC	CCCC	CCCC	TTCC	CCCC	TCCC	CCCC	CCCC	CCCC	TTTC	CCCC	CCCC	TCCC	CCCC	CCCC	CCCC	CCCC	CCCC	TCCC	CCCC	CCCC	TCCC	CCCC	CCCC	CCCC	CCCC	CCCC	TTCC	CCCC	CCCC	TCCC	CCCC	CCCC	CCCC	TCCC	CCCC	CCCC	CCCC
PotVar0008531	A	G	GGGG	GGGG	GGGG	GGGG	GGGG	GGGG	GGGG	GGGG	GGGG	GGGG	GGGG	GGGG	GGGG	GGGG	GGGG	GGGG	GGGG	GGGG	GGGG	GGGG	GGGG	GGGG	GGGG	GGGG	GGGG	GGGG	GGGG	GGGG	GGGG	GGGG	GGGG	GGGG	GGGG	GGGG	GGGG	GGGG	GGGG	GGGG	GGGG	GGGG	GGGG	GGGG	GGGG	GGGG	GGGG	GGGG	GGGG
PotVar0008540	A	G	----	----	----	----	----	----	----	----	----	----	----	----	----	----	----	----	----	----	----	----	----	----	----	----	----	----	----	----	----	----	----	----	----	----	----	----	----	----	----	----	----	----	----	----	----	----	----
PotVar0008553	T	G	TGGG	TGGG	GGGG	GGGG	TGGG	TGGG	GGGG	GGGG	GGGG	TGGG	GGGG	GGGG	GGGG	GGGG	TGGG	TGGG	GGGG	GGGG	GGGG	GGGG	TGGG	----	TGGG	TGGG	GGGG	GGGG	TGGG	GGGG	GGGG	TGGG	GGGG	TGGG	TGGG	----	GGGG	TGGG	GGGG	TGGG	GGGG	TGGG	TGGG	TGGG	GGGG	GGGG	GGGG	TGGG	TGGG
PotVar0008569	T	C	----	----	----	----	----	----	----	----	----	----	----	----	----	----	----	----	----	----	----	----	----	----	----	----	----	----	----	----	----	----	----	----	----	----	----	----	----	----	----	----	----	----	----	----	----	----	----
PotVar0008571	T	C	----	----	----	----	----	----	----	----	----	----	----	----	----	----	----	----	----	----	----	----	----	----	----	----	----	----	----	----	----	----	----	----	----	----	----	----	----	----	----	----	----	----	----	----	----	----	----
PotVar0008636	T	C	TTTC	TTTT	TTTC	TTTC	TTCC	TTTT	TTTT	TTTC	TTTC	TTTT	TTTC	TTTC	TTTT	TTTT	TTTT	TTTT	TTTT	TTCC	TTTT	TTTT	TTTT	TTTT	TTTT	TTTT	TTTC	TTTC	TTTT	TTTT	TTTT	TTTT	TTTT	TTTT	TTTT	TTTC	TTTT	TTTT	TTTT	TTTT	TTTT	TTTT	TTTC	TTTT	TTTT	TTTC	TTTT	TTTT	TTTT
PotVar0008637	T	C	TTTC	TTTC	TTTC	TTCC	TTTT	TTTC	TTTC	TTTT	TTCC	TTCC	TTTC	TTTC	TCCC	TCCC	TTTC	TTTT	TTTT	TTTT	CCCC	TTCC	TTTT	----	TTTC	TTTC	TTTT	TTTT	TTTT	TTTC	TCCC	TTCC	TTTC	TTTT	TTTC	TTTC	TCCC	TTTC	TTCC	TTTT	TTCC	TTCC	TTTT	TTTC	TCCC	TTTC	TTTT	TTTC	TTTT
PotVar0008666	T	C	----	----	----	----	----	----	----	----	----	----	----	----	----	----	----	----	----	----	----	----	----	----	----	----	----	----	----	----	----	----	----	----	----	----	----	----	----	----	----	----	----	----	----	----	----	----	----
PotVar0008668	A	G	AAAA	AAAA	AAGG	AAAA	AAAA	AAGG	AAAG	AAAA	AAAG	AAAA	AAAG	AAGG	AAAG	AAAG	AAGG	AAAG	AAAG	AAAG	AAAA	AAAA	AGGG	AAAA	AAAA	AAAG	AAAA	AAAA	AAGG	AGGG	AAAG	AAAG	AAAG	AAAG	AAAA	AAAG	AAAG	AAAA	AAAG	AGGG	AAAG	AAGG	AAAA	AAAA	AAAA	AAAA	AGGG	AAAG	AAGG
PotVar0008670	T	C	TTTC	TTTT	TTTT	TTTC	TTTT	TTTT	TTTT	TTTT	TTCC	TTTC	TTTT	TTTC	TTCC	TTTT	TTTC	TTTT	TTTT	TTTT	TTCC	TTTC	TTTT	TTCC	TTTT	TTTT	TTTT	TTTT	TTTT	TTTC	TTTC	TTTT	TTTC	TTTT	TTTT	TTTC	TCCC	TTTT	TTCC	TTTT	TTTT	TTTC	TTTT	TTTT	TTCC	TTTC	TTTT	TTTT	TTTT
PotVar0008711	T	G	GGGG	TGGG	TTGG	TGGG	GGGG	TTGG	TTGG	----	TGGG	TGGG	----	TGGG	TTGG	TTTG	TTGG	TGGG	TTTG	GGGG	TTGG	TTGG	TTTG	----	TTGG	TTGG	----	----	TTGG	TTGG	TTTG	TTGG	TTGG	TGGG	TTGG	TGGG	TGGG	TTGG	GGGG	TTTG	TTTG	TTTG	----	TTGG	TTGG	GGGG	TTTT	TTTG	TGGG
PotVar0008714	T	G	TTTT	TTTT	TTTT	TTTT	TTTT	TTTT	TTTT	TTTG	TTTT	TTTT	TTTT	TTTT	TTTT	TTTT	TTTT	TTTT	TTGG	TTTT	TTTT	TTTG	TTTT	TTTG	TTTG	TTTT	TTGG	TTGG	TTTT	TTTT	TTGG	TTTT	TTTG	TTTT	TTTG	TTTT	TTTT	TTTG	TTTT	TTTT	TTTT	TTTG	TTTG	TTTG	TTTG	TTTT	TTTG	TTTG	TTTT
PotVar0008720	A	C	AAAA	AAAA	AAAA	AAAA	AAAA	AAAA	AAAA	AAAA	AAAA	AAAA	AAAA	AAAA	AAAA	AAAA	AAAA	AAAA	AAAA	AAAA	AAAA	AAAA	AAAA	AAAA	AAAA	AAAA	AAAA	AAAA	AAAA	AAAA	AAAC	AAAA	AAAA	AAAA	AAAA	AAAA	AAAA	AAAA	AAAA	AAAA	AAAA	AAAA	AAAA	AAAA	AAAA	AAAA	AAAA	AAAA	AAAA
PotVar0008725	A	G	AAAG	AAAA	AAAA	AAAG	AAAA	AAAA	AAAA	AAAA	AAGG	AAAG	AAAA	AAAG	AAGG	AAAA	AAAG	AAAA	AAAA	AAAA	AAGG	AAAG	AAAA	AAGG	AAAA	AAAA	AAAA	AAAA	AAAA	AAAG	AAAG	AAAA	AAAG	AAAA	AAAA	AAAG	AGGG	AAAA	AAGG	AAAA	AAAA	AAAG	AAAA	AAAA	AAGG	AAAG	AAAA	AAAA	AAAA
PotVar0008817	A	C	----	----	----	----	----	----	----	----	----	----	----	----	----	----	----	----	----	----	----	----	----	----	----	----	----	----	----	----	----	----	----	----	----	----	----	----	----	----	----	----	----	----	----	----	----	----	----
PotVar0008826	A	G	AAAG	AGGG	AAAG	AAAG	AAAG	AAAG	AGGG	AGGG	AAAG	AAAG	AAGG	AAAG	AAAG	AAAG	AAGG	AGGG	GGGG	AAAG	AAAA	AAGG	AGGG	AAAG	AAGG	AAGG	AGGG	AGGG	AGGG	AAGG	AAAG	AAAA	AGGG	AGGG	AAGG	AAAG	AAAG	AAGG	AAAG	AGGG	AAGG	AAGG	AAGG	AGGG	AAGG	AAGG	GGGG	AAGG	AAGG
PotVar0008851	T	C	TTCC	TTTC	TCCC	TTCC	TCCC	TCCC	TTTC	TTTC	TTTC	TTCC	TTCC	TTCC	TTTC	TCCC	TTTC	TTTC	TTTT	TCCC	----	TTTC	TTTC	TTTC	TTCC	TTCC	TTTC	TTTC	TTTC	TTTC	TTCC	CCCC	TTTT	TTTC	TTCC	TTCC	TTTT	TTCC	TTTC	TTTC	TTCC	TTTC	TTCC	TTTC	TTTT	TTTC	TTTT	TTCC	TTCC
PotVar0008852	A	C	AAAA	AAAA	AAAC	AAAA	AAAA	AAAC	AAAA	AAAA	AAAA	AAAA	AAAA	AAAC	AAAA	AAAC	AAAA	AAAA	AAAA	AAAC	AAAA	AAAA	AAAA	AAAA	AAAA	AAAA	AAAA	AAAA	AAAA	----	AAAA	AAAC	AAAA	AAAA	AAAA	AAAC	AAAA	AAAA	AAAC	AAAA	AAAA	AAAA	AAAA	AAAA	AAAA	AAAA	AAAA	AAAA	AAAC
PotVar0008857	A	G	AGGG	AAGG	GGGG	AGGG	AGGG	GGGG	AAGG	AAGG	GGGG	AGGG	AGGG	GGGG	GGGG	GGGG	GGGG	AAGG	AGGG	AGGG	GGGG	AGGG	GGGG	GGGG	AGGG	AGGG	AGGG	AGGG	AGGG	GGGG	GGGG	GGGG	AGGG	AAGG	AGGG	AGGG	GGGG	AGGG	AGGG	GGGG	AGGG	GGGG	AGGG	AGGG	GGGG	AAGG	GGGG	GGGG	AGGG
PotVar0008860	T	C	CCCC	CCCC	TCCC	TCCC	CCCC	TCCC	TCCC	CCCC	CCCC	TCCC	TCCC	CCCC	TCCC	TTCC	CCCC	CCCC	CCCC	CCCC	TTCC	TCCC	CCCC	----	TCCC	TCCC	CCCC	CCCC	CCCC	CCCC	TCCC	TTCC	CCCC	CCCC	TCCC	CCCC	CCCC	TCCC	CCCC	CCCC	TTCC	CCCC	CCCC	CCCC	CCCC	CCCC	CCCC	TCCC	CCCC
PotVar0008867	T	C	CCCC	CCCC	CCCC	CCCC	CCCC	CCCC	CCCC	TCCC	CCCC	CCCC	CCCC	CCCC	CCCC	CCCC	CCCC	CCCC	TTCC	CCCC	CCCC	TCCC	CCCC	TCCC	TCCC	CCCC	TTCC	TTCC	CCCC	CCCC	CCCC	CCCC	TCCC	CCCC	TCCC	CCCC	CCCC	TCCC	CCCC	CCCC	CCCC	CCCC	CCCC	TCCC	TCCC	CCCC	TCCC	TCCC	CCCC
PotVar0008901	T	C	----	----	----	----	----	----	----	----	----	----	----	----	----	----	----	----	----	----	----	----	----	----	----	----	----	----	----	----	----	----	----	----	----	----	----	----	----	----	----	----	----	----	----	----	----	----	----
PotVar0008902	T	G	----	----	----	----	----	----	----	----	----	----	----	----	----	----	----	----	----	----	----	----	----	----	----	----	----	----	----	----	----	----	----	----	----	----	----	----	----	----	----	----	----	----	----	----	----	----	----
PotVar0008903	T	C	TCCC	CCCC	TCCC	TCCC	TTCC	CCCC	CCCC	TCCC	TCCC	CCCC	TCCC	TCCC	CCCC	CCCC	CCCC	CCCC	CCCC	TTCC	CCCC	CCCC	CCCC	CCCC	CCCC	CCCC	TCCC	TCCC	CCCC	CCCC	CCCC	CCCC	CCCC	CCCC	CCCC	CCCC	CCCC	CCCC	CCCC	CCCC	CCCC	CCCC	TCCC	CCCC	CCCC	TCCC	CCCC	CCCC	CCCC
PotVar0008904	A	G	GGGG	AGGG	GGGG	GGGG	GGGG	GGGG	GGGG	GGGG	GGGG	GGGG	GGGG	GGGG	GGGG	GGGG	GGGG	GGGG	GGGG	GGGG	GGGG	GGGG	GGGG	GGGG	GGGG	GGGG	GGGG	GGGG	GGGG	GGGG	GGGG	GGGG	GGGG	GGGG	GGGG	GGGG	GGGG	GGGG	GGGG	GGGG	GGGG	GGGG	GGGG	AGGG	GGGG	GGGG	GGGG	GGGG	GGGG
PotVar0008905	A	G	AGGG	AGGG	AGGG	AGGG	AAGG	GGGG	GGGG	AGGG	AGGG	GGGG	AGGG	AGGG	GGGG	GGGG	GGGG	GGGG	GGGG	AAGG	GGGG	GGGG	GGGG	GGGG	GGGG	GGGG	AGGG	AGGG	GGGG	GGGG	GGGG	GGGG	GGGG	GGGG	GGGG	GGGG	GGGG	GGGG	GGGG	GGGG	GGGG	GGGG	AGGG	AGGG	GGGG	AGGG	GGGG	GGGG	GGGG
PotVar0008906	A	G	AAGG	AAGG	GGGG	AAGG	AGGG	GGGG	AAGG	AAGG	AAGG	AAGG	AGGG	AGGG	AAGG	GGGG	AGGG	AAGG	AGGG	AGGG	AAAG	AAGG	GGGG	AAGG	AGGG	AGGG	AGGG	AGGG	AGGG	AGGG	AGGG	GGGG	AAGG	AAGG	AGGG	AAGG	AAAG	AGGG	AAAG	GGGG	AGGG	AGGG	AGGG	AGGG	AAGG	AAAG	GGGG	GGGG	AGGG
PotVar0008928	A	G	AAAG	AAGG	AAAA	AAAG	AAAG	AAAA	AAGG	AAGG	AAAA	AAAG	AAAG	AAAA	AAAA	AAAA	AAAA	AAGG	AAAG	AAAG	AAAA	AAAG	AAAA	AAAA	AAAG	AAAG	AAAG	AAAG	AAAG	AAAA	AAAA	AAAA	AAAG	AAGG	AAAG	AAAG	AAAA	AAAG	AAAG	AAAA	AAAG	AAAA	AAAG	AAAG	AAAA	AAGG	AAAA	AAAA	AAAG
PotVar0008935	T	C	CCCC	CCCC	CCCC	CCCC	CCCC	CCCC	CCCC	CCCC	CCCC	CCCC	CCCC	CCCC	CCCC	TCCC	CCCC	CCCC	CCCC	CCCC	CCCC	CCCC	CCCC	CCCC	CCCC	CCCC	CCCC	CCCC	CCCC	CCCC	CCCC	CCCC	CCCC	CCCC	CCCC	CCCC	CCCC	CCCC	CCCC	CCCC	CCCC	CCCC	CCCC	CCCC	TCCC	CCCC	CCCC	CCCC	CCCC
PotVar0008942	T	C	----	----	----	----	----	----	----	----	----	----	----	----	----	----	----	----	----	----	----	----	----	----	----	----	----	----	----	----	----	----	----	----	----	----	----	----	----	----	----	----	----	----	----	----	----	----	----
PotVar0008949	T	C	TCCC	TTCC	CCCC	TCCC	TCCC	CCCC	TTCC	TTCC	CCCC	TCCC	TCCC	CCCC	CCCC	CCCC	CCCC	TTCC	TCCC	TCCC	CCCC	TCCC	CCCC	----	TCCC	TCCC	TCCC	TCCC	TCCC	CCCC	CCCC	CCCC	TCCC	TTCC	TCCC	TCCC	CCCC	TCCC	TCCC	CCCC	TCCC	CCCC	TCCC	TCCC	CCCC	TTCC	CCCC	CCCC	TCCC
PotVar0008957	A	G	AAAA	AAAA	AAAA	AAAA	AAAA	AAAA	AAAA	AAAA	AAAA	AAAA	AAAA	AAAA	AAAA	AAAA	AAAA	AAAA	AAAA	AAAA	AAAA	AAAA	AAAA	AAAA	AAAA	AAAA	AAAA	AAAA	AAAA	AAAA	AAAA	AAAA	AAAA	AAAA	AAAA	AAAA	AAAA	AAAA	AAAA	AAAA	AAAA	AAAA	AAAA	AAAG	AAAA	AAAA	AAAA	AAAA	AAAA
PotVar0008965	T	G	----	----	----	----	----	----	----	----	----	----	----	----	----	----	----	----	----	----	----	----	----	----	----	----	----	----	----	----	----	----	----	----	----	----	----	----	----	----	----	----	----	----	----	----	----	----	----
PotVar0009002	A	G	AAAG	AAAA	----	AAAG	AAGG	AAGG	AAAG	AAGG	AAAA	AAGG	AAAA	AAAG	AAAG	AAGG	AAAG	AAAG	AAGG	GGGG	AAGG	AAGG	AAAA	AAGG	AAGG	AAAG	AAGG	AAGG	AAAG	AAGG	AAGG	AAAG	AAAG	AAAA	AAGG	AAAG	AAAG	AAGG	AAAG	AAAA	AAAG	AAGG	AAGG	AAAA	AAGG	AAAG	AGGG	AAAA	AAGG
PotVar0009006	T	C	CCCC	CCCC	CCCC	TCCC	CCCC	CCCC	TCCC	CCCC	CCCC	CCCC	CCCC	CCCC	CCCC	CCCC	CCCC	CCCC	CCCC	CCCC	CCCC	CCCC	CCCC	CCCC	TCCC	CCCC	TCCC	TCCC	CCCC	CCCC	CCCC	CCCC	TCCC	CCCC	TCCC	CCCC	TCCC	CCCC	TCCC	CCCC	CCCC	CCCC	CCCC	TCCC	TCCC	CCCC	CCCC	CCCC	CCCC
PotVar0009052	T	C	TTTT	TTTT	TTTT	TTTT	TTTT	TTTT	TTTT	TTTT	TTTT	TTTT	TTTT	TTTT	TTTT	TTTT	TTTT	TTTT	TTTT	TTTT	TTTT	TTTT	TTTT	TTTT	TTTT	TTTT	TTTT	TTTT	TTTT	TTTT	TTTT	TTTT	TTTT	TTTT	TTTT	TTTT	TTTT	TTTT	TTTT	TTTT	TTTT	TTTT	TTTT	TTTT	TTTT	TTTC	TTTT	TTTT	TTTT
PotVar0009060	A	G	AAAA	AAAA	AAAA	AAAA	AAAA	AAAA	AAAA	AAAA	AAAA	AAAG	AAAA	AAAA	AAAA	AAAA	AAAA	AAAA	AAAA	AAAA	AAAA	AAAA	AAAA	AAAA	AAAA	AAAA	AAAA	AAAA	AAAA	AAAA	AAAA	AAAA	AAAG	AAAA	AAAA	AAAA	AAAA	AAAA	AAAA	AAAA	AAAA	AAAA	AAAA	AAAA	AAAA	AAAA	AAAA	AAAG	AAAA
PotVar0009073	T	C	CCCC	CCCC	CCCC	TCCC	CCCC	CCCC	TCCC	CCCC	CCCC	CCCC	CCCC	CCCC	CCCC	CCCC	CCCC	CCCC	CCCC	CCCC	CCCC	CCCC	CCCC	CCCC	TCCC	CCCC	TCCC	TCCC	CCCC	CCCC	CCCC	CCCC	TCCC	CCCC	TCCC	CCCC	CCCC	CCCC	TCCC	CCCC	CCCC	CCCC	CCCC	TCCC	TCCC	CCCC	CCCC	CCCC	CCCC
PotVar0009080	A	G	GGGG	GGGG	GGGG	GGGG	GGGG	GGGG	GGGG	GGGG	AGGG	GGGG	GGGG	GGGG	GGGG	GGGG	GGGG	GGGG	GGGG	GGGG	GGGG	GGGG	GGGG	GGGG	GGGG	GGGG	GGGG	GGGG	GGGG	GGGG	GGGG	GGGG	GGGG	GGGG	GGGG	GGGG	GGGG	GGGG	GGGG	AGGG	GGGG	GGGG	GGGG	GGGG	GGGG	AGGG	GGGG	GGGG	GGGG
PotVar0009086	T	C	----	----	----	----	----	----	----	----	----	----	----	----	----	----	----	----	----	----	----	----	----	----	----	----	----	----	----	----	----	----	----	----	----	----	----	----	----	----	----	----	----	----	----	----	----	----	----
PotVar0009111	T	C	CCCC	CCCC	CCCC	CCCC	CCCC	CCCC	CCCC	CCCC	CCCC	CCCC	CCCC	CCCC	CCCC	CCCC	CCCC	CCCC	CCCC	CCCC	CCCC	CCCC	CCCC	CCCC	CCCC	TCCC	CCCC	CCCC	TCCC	CCCC	CCCC	CCCC	CCCC	CCCC	CCCC	CCCC	TCCC	CCCC	CCCC	CCCC	CCCC	CCCC	CCCC	CCCC	CCCC	CCCC	CCCC	CCCC	CCCC
PotVar0009120	T	C	CCCC	CCCC	CCCC	CCCC	CCCC	TCCC	CCCC	CCCC	TCCC	TCCC	TCCC	TCCC	CCCC	TCCC	TCCC	CCCC	TCCC	TCCC	CCCC	CCCC	TCCC	CCCC	CCCC	TCCC	CCCC	CCCC	TCCC	----	CCCC	TCCC	CCCC	TTCC	CCCC	CCCC	CCCC	TCCC	TCCC	TTCC	TTCC	CCCC	CCCC	TCCC	CCCC	TTCC	CCCC	CCCC	TTCC
PotVar0009159	T	C	TTTT	TTTT	TTTT	TTTT	TTTT	TTTT	TTTT	TTTT	TTTT	TTTT	TTTT	TTTT	TTTT	TTTT	TTTT	TTTT	TTTT	TTTT	TTTT	TTTT	TTTT	TTTT	TTTT	TTTT	TTTT	TTTT	TTTT	TTTT	TTTT	TTTT	TTTT	TTTT	TTTT	TTTT	TTTT	TTTT	TTTT	TTTT	TTTT	TTTT	TTTT	TTTT	TTTT	TTTT	TTTT	TTTT	TTTT
PotVar0009170	T	C	TTTT	TTTC	TTTT	TTTC	TTTT	TTTC	TTTT	TTTT	TTTC	TTTC	TTTT	TTTT	TTTT	TTTC	TTTC	TTTT	TTTT	TTTT	TTTT	TTTT	TTTT	TTTT	TTTT	TTTT	TTTC	TTTC	TTTT	TTTT	TTTT	TTTT	TTTT	TTTT	TTTT	TTTT	TTTT	TTTT	TTTT	TTTT	TTTT	TTTT	TTTT	TTTT	TTTT	TTTT	TTTT	TTTT	TTTT
PotVar0009171	T	C	TTTC	TTTT	TTTT	TTTC	TTTT	TTTC	TTTC	TTTC	TTTT	TTTC	TTCC	TTTC	TTTT	TTTT	TTTT	TTTC	TTTT	TTTC	TTTT	TTTC	TTTT	TTTC	TTTC	TTTC	TTTT	TTTT	TTTT	TTTT	TTTC	TTTT	TTTC	TTTC	TTTC	TTTT	TTTC	TTTT	TTCC	TTTT	TTTC	TTTC	TTTT	TTTT	TTTC	TTTC	TTTT	TTTC	TTTC
PotVar0009177	A	G	----	----	----	----	----	----	----	----	----	----	----	----	----	----	----	----	----	----	----	----	----	----	----	----	----	----	----	----	----	----	----	----	----	----	----	----	----	----	----	----	----	----	----	----	----	----	----
PotVar0009178	T	G	TGGG	TGGG	GGGG	TTGG	TGGG	TTGG	TGGG	TGGG	TGGG	TTGG	TTGG	TGGG	GGGG	TGGG	TTGG	TGGG	TGGG	TTGG	GGGG	----	GGGG	TGGG	TGGG	TTGG	TGGG	TGGG	TGGG	TGGG	TGGG	GGGG	TGGG	TGGG	TGGG	TGGG	TGGG	GGGG	TTGG	GGGG	TGGG	TGGG	GGGG	GGGG	TGGG	TGGG	GGGG	TTGG	TGGG
PotVar0009202	A	C	AAAA	AAAA	AAAA	AAAA	AAAA	AAAA	AAAA	AAAA	AAAA	AAAA	AAAA	AAAA	AAAA	AAAA	AAAA	AAAA	AAAA	AAAA	AAAA	AAAA	AAAA	AAAA	AAAA	AAAA	AAAA	AAAA	AAAA	AAAA	AAAA	AAAA	AAAA	AAAA	AAAA	AAAA	AAAA	AAAA	AAAA	AAAA	AAAA	AAAA	AAAA	AAAA	AAAA	AAAA	AAAA	AAAA	AAAA
PotVar0009203	T	G	----	----	----	----	----	----	----	----	----	----	----	----	----	----	----	----	----	----	----	----	----	----	----	----	----	----	----	----	----	----	----	----	----	----	----	----	----	----	----	----	----	----	----	----	----	----	----
PotVar0009226	T	C	----	----	----	----	----	----	----	----	----	----	----	----	----	----	----	----	----	----	----	----	----	----	----	----	----	----	----	----	----	----	----	----	----	----	----	----	----	----	----	----	----	----	----	----	----	----	----
PotVar0009227	A	G	----	----	----	----	----	----	----	----	----	----	----	----	----	----	----	----	----	----	----	----	----	----	----	----	----	----	----	----	----	----	----	----	----	----	----	----	----	----	----	----	----	----	----	----	----	----	----
PotVar0009252	T	C	CCCC	CCCC	CCCC	CCCC	CCCC	CCCC	CCCC	CCCC	CCCC	CCCC	CCCC	CCCC	CCCC	CCCC	CCCC	CCCC	CCCC	CCCC	CCCC	CCCC	CCCC	CCCC	CCCC	CCCC	CCCC	CCCC	CCCC	CCCC	CCCC	CCCC	CCCC	CCCC	CCCC	CCCC	CCCC	CCCC	CCCC	CCCC	CCCC	CCCC	CCCC	CCCC	CCCC	CCCC	CCCC	CCCC	CCCC
PotVar0009279	A	C	CCCC	CCCC	CCCC	CCCC	ACCC	CCCC	CCCC	CCCC	CCCC	CCCC	CCCC	----	CCCC	CCCC	CCCC	CCCC	ACCC	----	CCCC	CCCC	CCCC	CCCC	CCCC	CCCC	CCCC	CCCC	CCCC	CCCC	CCCC	CCCC	CCCC	CCCC	CCCC	CCCC	CCCC	CCCC	CCCC	CCCC	CCCC	CCCC	CCCC	CCCC	CCCC	CCCC	CCCC	CCCC	CCCC
PotVar0009281	T	C	TTTT	TTTT	TTTC	TTTC	TTTT	TTTT	TTTC	TTTC	TTTT	TTTT	TTTC	TTTC	TTTC	TTTT	TTTT	TTCC	TTCC	TTTT	TTTC	TTTT	TTTC	TTTC	TTTT	TTTC	TTTC	TTTC	TTTC	----	TTCC	TTTC	TTTT	TTTC	TTTT	TTCC	TTTC	TTTC	TTTC	TTCC	TTTT	TTCC	TTTT	TTTT	TTTT	TTTT	TTTC	TTTT	TTCC
PotVar0009282	T	G	TTGG	TGGG	TGGG	TGGG	GGGG	TTGG	TGGG	TGGG	TGGG	TTGG	TTGG	TGGG	GGGG	TGGG	GGGG	TGGG	GGGG	TTGG	TGGG	TTTG	GGGG	TGGG	TGGG	TGGG	GGGG	GGGG	TGGG	GGGG	TGGG	GGGG	TTTG	TTGG	TGGG	GGGG	TTTG	GGGG	TTGG	GGGG	TTGG	TGGG	GGGG	GGGG	TTGG	TGGG	TTGG	TGGG	TTGG
PotVar0009283	A	G	AAGG	AAGG	AGGG	AAGG	AGGG	AAAG	AGGG	AGGG	AAGG	AAAG	AAAG	AGGG	GGGG	AAAG	AAGG	AGGG	AAGG	AAAG	AAGG	AAAG	AGGG	AGGG	AGGG	AAGG	AGGG	AGGG	AAGG	AGGG	AGGG	AGGG	AAAA	AAGG	AGGG	AGGG	AAAG	AAGG	AAGG	AGGG	AAGG	AAGG	AGGG	GGGG	AAGG	AGGG	AAGG	AAGG	AAGG
PotVar0009305	T	G	----	----	----	----	----	----	----	----	----	----	----	----	----	----	----	----	----	----	----	----	----	----	----	----	----	----	----	----	----	----	----	----	----	----	----	----	----	----	----	----	----	----	----	----	----	----	----
PotVar0009316	A	G	----	----	----	----	----	----	----	----	----	----	----	----	----	----	----	----	----	----	----	----	----	----	----	----	----	----	----	----	----	----	----	----	----	----	----	----	----	----	----	----	----	----	----	----	----	----	----
PotVar0009332	T	C	----	----	----	----	----	----	----	----	----	----	----	----	----	----	----	----	----	----	----	----	----	----	----	----	----	----	----	----	----	----	----	----	----	----	----	----	----	----	----	----	----	----	----	----	----	----	----
PotVar0009408	A	G	AAAA	AAAA	AAAA	AAAA	AAAA	AAAA	AAAA	AAAA	AAAA	AAAA	AAAA	AAAA	AAAA	AAAA	AAAA	AAAA	AAAA	AAAA	AAAA	AAAA	AAAA	AAAA	AAAA	AAAA	AAAA	AAAA	AAAA	AAAA	AAAA	AAAA	AAAA	AAAA	AAAA	AAAA	AAAA	AAAA	AAAA	AAAA	AAAA	AAAA	AAAA	AAAA	AAAA	AAAA	AAAA	AAAA	AAAA
PotVar0009410	A	G	AAAA	AAAA	AAAA	AAAA	AAAA	AAAA	AAAA	AAAA	AAAA	AAAA	AAAA	AAAA	AAAA	AAAA	AAAA	AAAA	AAAA	AAAA	AAAA	AAAA	AAAA	AAAA	AAAA	AAAA	AAAA	AAAA	AAAA	AAAA	AAAA	AAAA	AAAA	AAAA	AAAA	AAAA	AAAA	AAAA	AAAA	AAAA	AAAA	AAAA	AAAA	AAAA	AAAA	AAAA	AAAA	AAAA	AAAA
PotVar0009411	T	C	TTTT	TTTC	TTTT	TTTC	TTTT	TTTC	TTTT	TTTT	TTTC	TTTC	TTTC	TTTT	TTTT	TTCC	TTCC	TTTT	TTTC	TTTT	TTTC	TTTT	TTTC	TTTT	TTTT	TTTC	TTTC	TTTC	TTTC	TTTC	TTTT	TTTC	TTTC	TTTT	TTTT	TTTC	TTTT	TTCC	TTTT	TTTC	TTTT	TTTC	TTTC	TTTT	TTTT	TTTT	TTTT	TTTC	TTTT
PotVar0009429	A	C	AACC	AACC	AACC	AAAC	ACCC	AAAC	AAAC	AACC	AAAC	AAAC	AAAA	----	AAAC	AAAC	AAAC	AAAC	AAAA	AAAC	AAAA	AAAC	AACC	AACC	ACCC	AAAC	AACC	AACC	AAAC	AAAC	AAAA	AAAC	AAAA	AAAC	ACCC	AAAC	AAAA	AAAC	AAAC	AAAC	AACC	AAAA	ACCC	CCCC	AACC	ACCC	AAAC	AACC	AAAA
PotVar0009457	T	C	----	----	----	----	----	----	----	----	----	----	----	----	----	----	----	----	----	----	----	----	----	----	----	----	----	----	----	----	----	----	----	----	----	----	----	----	----	----	----	----	----	----	----	----	----	----	----
PotVar0009458	T	C	TTCC	TTCC	TTCC	TCCC	TTTC	TCCC	TCCC	TTCC	TCCC	TCCC	CCCC	TTCC	TCCC	TCCC	TCCC	TCCC	CCCC	TCCC	CCCC	TCCC	TTCC	TTCC	TTTC	TCCC	TTCC	TTCC	TCCC	TCCC	CCCC	TCCC	CCCC	TCCC	TTTC	TCCC	CCCC	TCCC	TCCC	TCCC	TTCC	CCCC	TTTC	TTTT	TTCC	TTTC	TCCC	TTCC	CCCC
PotVar0009460	T	G	----	----	----	----	----	----	----	----	----	----	----	----	----	----	----	----	----	----	----	----	----	----	----	----	----	----	----	----	----	----	----	----	----	----	----	----	----	----	----	----	----	----	----	----	----	----	----
PotVar0009466	T	C	TTCC	TTTT	TTTC	TTTC	TTTT	TTCC	TTTC	TTTC	TTTC	TTCC	TTCC	TTTC	TTTT	TTTC	TTTT	TTTC	TTTT	TTCC	TTTC	TCCC	TTTT	TTTC	TTTC	TTTC	TTTT	TTTT	TTTC	TTTT	TTTC	TTTT	TCCC	TTCC	TTTC	TTTT	TCCC	TTTT	TTCC	TTTT	TTCC	TTTC	TTTT	TTTT	TTCC	TTTC	TTCC	TTTC	TTCC
PotVar0009471	T	C	CCCC	TCCC	CCCC	CCCC	TCCC	CCCC	CCCC	CCCC	CCCC	CCCC	CCCC	CCCC	CCCC	CCCC	CCCC	CCCC	TCCC	TCCC	CCCC	CCCC	CCCC	CCCC	CCCC	CCCC	CCCC	CCCC	CCCC	CCCC	CCCC	CCCC	CCCC	CCCC	CCCC	CCCC	CCCC	CCCC	CCCC	CCCC	CCCC	CCCC	CCCC	CCCC	CCCC	CCCC	CCCC	CCCC	CCCC
PotVar0009474	T	C	TTTT	TTTT	TTTC	TTTC	TTTT	TTTT	TTTC	TTTC	TTTT	TTTT	TTTC	TTTC	TTTC	TTTT	TTTT	TTCC	TTCC	TTTT	TTTC	TTTT	TTTC	TTTC	TTTT	TTTC	TTTC	TTTC	TTTC	TTCC	TTCC	TTTC	TTTT	TTTC	TTTT	TTCC	TTTC	TTTC	TTTC	TTCC	TTTT	TTCC	TTTT	TTTT	TTTT	TTTT	TTTC	TTTT	TTCC
PotVar0009483	A	G	AAGG	GGGG	AGGG	AGGG	GGGG	AAGG	AGGG	AGGG	AGGG	AAGG	AAGG	AGGG	GGGG	AGGG	GGGG	AGGG	GGGG	AAGG	AGGG	AAAG	GGGG	AGGG	AGGG	AGGG	GGGG	GGGG	AGGG	GGGG	AGGG	GGGG	AAAG	AAGG	AGGG	GGGG	AAAG	GGGG	AAGG	GGGG	AAGG	AGGG	GGGG	GGGG	AAGG	AGGG	AAGG	AGGG	AAAG
PotVar0009505	A	G	AAGG	AAAA	AAAG	AAAG	AAAA	AAGG	AAAG	AAAG	AAAG	AAGG	AAGG	AAAG	AAAA	AAAG	AAAA	AAAG	AAAA	AAGG	AAAG	AGGG	AAAA	AAAG	AAAG	AAAG	AAAA	AAAA	AAAG	AAAA	AAAG	AAAA	----	AAGG	AAAG	AAAA	AGGG	AAAA	AAGG	AAAA	AAGG	AAAG	AAAA	AAAA	AAGG	AAAG	AAGG	AAAG	----
PotVar0009523	A	G	GGGG	AGGG	GGGG	GGGG	GGGG	GGGG	GGGG	GGGG	GGGG	GGGG	GGGG	GGGG	GGGG	GGGG	GGGG	GGGG	GGGG	GGGG	GGGG	GGGG	GGGG	GGGG	GGGG	GGGG	GGGG	GGGG	GGGG	GGGG	GGGG	GGGG	GGGG	GGGG	GGGG	GGGG	GGGG	GGGG	GGGG	GGGG	GGGG	GGGG	GGGG	GGGG	GGGG	GGGG	GGGG	GGGG	GGGG
PotVar0009542	T	C	TTCC	TTCC	TTCC	TCCC	TTTC	TCCC	TTCC	TTCC	TTCC	TCCC	CCCC	----	TTTC	TCCC	TTCC	TCCC	CCCC	TCCC	TCCC	TCCC	TTCC	TTCC	TTTC	TCCC	TTCC	TTCC	TCCC	TCCC	TCCC	TTCC	CCCC	TCCC	TTTC	TCCC	CCCC	TCCC	TCCC	TCCC	TTCC	CCCC	TTTC	TTTT	TTCC	TTTC	TCCC	TTCC	CCCC
PotVar0009548	T	C	CCCC	CCCC	TCCC	TCCC	CCCC	CCCC	TCCC	TCCC	CCCC	CCCC	TCCC	TCCC	TCCC	CCCC	CCCC	TTCC	TTCC	CCCC	TCCC	CCCC	TCCC	TCCC	CCCC	TCCC	TCCC	TCCC	TCCC	TTCC	TTCC	TCCC	CCCC	TCCC	CCCC	TTCC	TCCC	TCCC	TCCC	TTCC	CCCC	TTCC	CCCC	CCCC	CCCC	CCCC	TCCC	CCCC	TTCC
PotVar0009566	T	C	----	----	----	----	----	----	----	----	----	----	----	----	----	----	----	----	----	----	----	----	----	----	----	----	----	----	----	----	----	----	----	----	----	----	----	----	----	----	----	----	----	----	----	----	----	----	----
PotVar0009567	A	G	GGGG	AAGG	AGGG	AAGG	AGGG	AGGG	AGGG	AGGG	AGGG	AGGG	AAGG	AGGG	AGGG	AAGG	AAGG	AAGG	AAAA	AGGG	AAGG	GGGG	AAGG	AGGG	GGGG	AAGG	AAGG	AAGG	AAGG	AAAG	AAGG	AAGG	AGGG	AGGG	GGGG	AAAG	AGGG	AAAG	AGGG	AAAG	GGGG	AAAG	AGGG	GGGG	GGGG	GGGG	AGGG	AGGG	AAGG
PotVar0009568	A	G	GGGG	GGGG	GGGG	GGGG	GGGG	GGGG	GGGG	GGGG	GGGG	GGGG	GGGG	GGGG	GGGG	GGGG	GGGG	GGGG	GGGG	GGGG	GGGG	GGGG	GGGG	GGGG	GGGG	GGGG	GGGG	GGGG	GGGG	GGGG	GGGG	GGGG	GGGG	GGGG	GGGG	GGGG	GGGG	GGGG	GGGG	GGGG	GGGG	GGGG	GGGG	GGGG	GGGG	GGGG	GGGG	GGGG	GGGG
PotVar0009569	A	G	GGGG	AGGG	AGGG	AAGG	GGGG	AGGG	AAGG	AGGG	AAGG	AGGG	AAGG	AGGG	AAAG	AAGG	AAAG	AAGG	AAAG	GGGG	AAAG	GGGG	AAGG	AGGG	GGGG	AAGG	AAGG	AAGG	AAGG	AAAG	AAAG	AAAG	AGGG	AGGG	GGGG	AAAG	AGGG	AAAG	AGGG	AAAG	GGGG	AAAG	AGGG	GGGG	GGGG	GGGG	AGGG	AGGG	AAGG
PotVar0009570	T	G	GGGG	GGGG	GGGG	GGGG	GGGG	GGGG	TGGG	GGGG	TGGG	GGGG	GGGG	GGGG	TTGG	GGGG	TGGG	GGGG	GGGG	GGGG	TGGG	GGGG	GGGG	GGGG	GGGG	GGGG	GGGG	GGGG	GGGG	GGGG	TGGG	TGGG	GGGG	GGGG	GGGG	GGGG	GGGG	GGGG	GGGG	GGGG	GGGG	GGGG	GGGG	GGGG	GGGG	GGGG	GGGG	GGGG	GGGG
PotVar0009575	A	G	AAGG	GGGG	AGGG	AGGG	GGGG	AAGG	AGGG	AGGG	AGGG	AAGG	AAGG	AGGG	GGGG	AGGG	GGGG	AGGG	GGGG	AAGG	AGGG	AAAG	GGGG	AGGG	AGGG	AGGG	GGGG	GGGG	AGGG	GGGG	AGGG	GGGG	AAAG	AAGG	AGGG	GGGG	AAAG	GGGG	AAGG	GGGG	AAGG	AGGG	GGGG	GGGG	AAGG	AGGG	AAGG	AGGG	AAGG
PotVar0009581	T	C	TTTT	TTTT	TTTT	TTTT	TTTT	TTTT	TTTT	TTTT	TTTT	TTTT	TTTT	TTTT	TTTT	TTTT	TTTT	TTTT	TTTT	TTTT	TTTT	TTTT	TTTT	TTTT	TTTT	TTTT	TTTT	TTTT	TTTT	TTTT	TTTT	TTTT	TTTT	TTTT	TTTT	TTTT	TTTT	TTTT	TTTT	TTTT	TTTT	TTTT	TTTT	TTTT	TTTT	TTTT	TTTT	TTTT	TTTT
PotVar0009608	A	G	GGGG	GGGG	GGGG	GGGG	GGGG	GGGG	AGGG	GGGG	AGGG	GGGG	GGGG	GGGG	AAGG	GGGG	AGGG	GGGG	GGGG	GGGG	AGGG	GGGG	GGGG	GGGG	GGGG	GGGG	GGGG	GGGG	GGGG	GGGG	AGGG	AGGG	GGGG	GGGG	GGGG	GGGG	GGGG	GGGG	GGGG	GGGG	GGGG	GGGG	GGGG	GGGG	GGGG	GGGG	GGGG	GGGG	GGGG
PotVar0009610	T	C	TTCC	TTCC	TTCC	TCCC	TTTC	TCCC	TCCC	TCCC	TCCC	TCCC	CCCC	TTCC	TCCC	TCCC	TCCC	TCCC	CCCC	TCCC	CCCC	TCCC	TTCC	TTCC	TTTC	TCCC	TTCC	TTCC	TCCC	TCCC	CCCC	TCCC	CCCC	TCCC	TTTC	TCCC	CCCC	TCCC	TCCC	TCCC	TTCC	CCCC	TTTC	TTTT	TTCC	TTTC	TCCC	TTCC	CCCC
PotVar0009620	A	G	----	----	----	----	----	----	----	----	----	----	----	----	----	----	----	----	----	----	----	----	----	----	----	----	----	----	----	----	----	----	----	----	----	----	----	----	----	----	----	----	----	----	----	----	----	----	----
PotVar0009624	A	G	----	----	----	----	----	----	----	----	----	----	----	----	----	----	----	----	----	----	----	----	----	----	----	----	----	----	----	----	----	----	----	----	----	----	----	----	----	----	----	----	----	----	----	----	----	----	----
PotVar0009651	T	C	----	----	----	----	----	----	----	----	----	----	----	----	----	----	----	----	----	----	----	----	----	----	----	----	----	----	----	----	----	----	----	----	----	----	----	----	----	----	----	----	----	----	----	----	----	----	----
PotVar0009673	T	G	TTTT	TTTT	TTTT	TTTT	TTTT	TTTG	TTTT	TTGG	TTTT	TTTG	TTTG	TTTT	TTTT	TTGG	TTTT	TTTT	TTTG	TTTT	TTTG	TTTT	TTTG	TTTT	TTTT	TTTT	TTTG	TTTG	TTTT	TTTT	TTTT	TTTG	TTTG	TTTT	TTTT	TTTG	TTTT	TTGG	TTTT	TTTG	TTTT	TTTG	TTTG	TTTT	TTTT	TTTT	TTTT	TTTT	TTTT
PotVar0009747	T	C	TTCC	TTTT	TTTC	TTTC	TTTT	TTCC	TTTC	TTTC	TTTC	TTCC	TTCC	TTTC	TTTT	TTTC	TTTT	TTTC	TTTT	TTCC	TTTC	TCCC	TTTT	TTTC	TTTC	TTTC	TTTT	TTTT	TTTC	TTTT	TTTC	TTTT	TCCC	TTCC	TTTC	TTTT	TCCC	TTTT	TTCC	TTTT	TTCC	TTTC	TTTT	TTTT	TTCC	TTTC	TTCC	TTTC	TTCC
PotVar0009760	A	G	----	----	----	----	----	----	----	----	----	----	----	----	----	----	----	----	----	----	----	----	----	----	----	----	----	----	----	----	----	----	----	----	----	----	----	----	----	----	----	----	----	----	----	----	----	----	----
PotVar0009781	A	G	GGGG	AGGG	GGGG	GGGG	AGGG	GGGG	GGGG	GGGG	GGGG	GGGG	GGGG	GGGG	GGGG	GGGG	GGGG	GGGG	AGGG	AGGG	GGGG	GGGG	GGGG	GGGG	GGGG	GGGG	GGGG	GGGG	GGGG	GGGG	GGGG	GGGG	GGGG	GGGG	GGGG	GGGG	GGGG	GGGG	GGGG	GGGG	GGGG	GGGG	GGGG	GGGG	GGGG	GGGG	GGGG	GGGG	GGGG
PotVar0009797	A	C	CCCC	ACCC	CCCC	ACCC	CCCC	CCCC	CCCC	CCCC	ACCC	CCCC	CCCC	CCCC	CCCC	CCCC	ACCC	CCCC	CCCC	CCCC	CCCC	CCCC	CCCC	CCCC	CCCC	CCCC	CCCC	CCCC	CCCC	CCCC	CCCC	CCCC	CCCC	CCCC	CCCC	CCCC	CCCC	CCCC	CCCC	CCCC	CCCC	CCCC	CCCC	CCCC	CCCC	CCCC	CCCC	CCCC	CCCC
PotVar0009802	T	C	TTTT	TTTT	TTTT	TTTT	TTTT	TTTT	TTTT	TTTT	TTTT	TTTT	TTTT	TTTT	TTTT	TTTT	TTTT	TTTT	TTTT	TTTT	TTTT	TTTT	TTTT	TTTT	TTTT	TTTT	TTTT	TTTT	TTTT	TTTT	TTTT	TTTT	TTTT	TTTT	TTTT	TTTT	TTTT	TTTT	TTTT	TTTT	TTTT	TTTT	TTTT	TTTT	TTTT	TTTT	TTTT	TTTT	TTTT
PotVar0009808	T	C	CCCC	CCCC	CCCC	CCCC	CCCC	TCCC	CCCC	TTCC	CCCC	TCCC	TCCC	CCCC	CCCC	TTCC	CCCC	CCCC	TCCC	CCCC	TCCC	CCCC	TCCC	CCCC	CCCC	CCCC	TCCC	TCCC	CCCC	CCCC	CCCC	TCCC	TCCC	CCCC	CCCC	CCCC	CCCC	TTCC	CCCC	TCCC	CCCC	TCCC	TCCC	CCCC	CCCC	CCCC	CCCC	CCCC	CCCC
PotVar0009827	T	C	TTTC	TCCC	TTCC	TTCC	TCCC	TTTC	TCCC	TTCC	TCCC	TTCC	TTCC	TTCC	CCCC	TCCC	CCCC	TCCC	CCCC	TTCC	TCCC	TTTT	CCCC	TTCC	TCCC	TCCC	CCCC	CCCC	TCCC	CCCC	TCCC	CCCC	TTTC	TTCC	TCCC	TCCC	TTTC	CCCC	TTCC	TCCC	TTCC	TCCC	TCCC	TCCC	TTCC	TCCC	TTTC	TCCC	TTCC
PotVar0009843	A	G	AAAA	AAAA	AAAA	AAAA	AAAA	AAAA	AAAA	AAAA	AAAA	AAAA	AAAA	AAAA	AAAA	AAAA	AAAA	AAAA	AAAA	AAAA	AAAA	AAAA	AAAA	AAAA	AAAA	AAAA	AAAA	AAAA	AAAA	AAAA	AAAA	AAAA	AAAA	AAAA	AAAA	AAAA	AAAA	AAAA	AAAA	AAAA	AAAA	AAAA	AAAA	AAAA	AAAA	AAAA	AAAA	AAAA	AAAA
PotVar0009844	T	C	----	----	----	----	----	----	----	----	----	----	----	----	----	----	----	----	----	----	----	----	----	----	----	----	----	----	----	----	----	----	----	----	----	----	----	----	----	----	----	----	----	----	----	----	----	----	----
PotVar0009845	T	C	CCCC	CCCC	CCCC	CCCC	CCCC	CCCC	CCCC	CCCC	TCCC	CCCC	CCCC	CCCC	CCCC	CCCC	CCCC	CCCC	CCCC	CCCC	CCCC	CCCC	CCCC	CCCC	CCCC	CCCC	CCCC	CCCC	CCCC	CCCC	CCCC	TCCC	CCCC	CCCC	CCCC	CCCC	CCCC	CCCC	CCCC	CCCC	CCCC	CCCC	CCCC	CCCC	CCCC	CCCC	CCCC	CCCC	CCCC
PotVar0009846	A	G	AAGG	GGGG	AGGG	AAGG	GGGG	AGGG	AAGG	AGGG	GGGG	AGGG	AAAG	AAAG	AGGG	AGGG	GGGG	AAAG	----	AGGG	AGGG	----	AGGG	AAGG	AGGG	AAGG	AGGG	AGGG	AAGG	AAGG	AAAG	AGGG	AGGG	AAAG	AGGG	AAGG	AAGG	AGGG	AAAG	AAGG	AGGG	AAAG	GGGG	GGGG	AGGG	AGGG	AGGG	AGGG	AAAG
PotVar0009857	T	G	GGGG	TTGG	TGGG	TTGG	TGGG	TGGG	TTGG	TTGG	TTGG	TGGG	TTGG	TGGG	TTTG	TTGG	TTTG	TTGG	TTTT	TGGG	TTTG	GGGG	TTGG	TGGG	GGGG	TTGG	TTGG	TTGG	TTGG	TTTG	TTGG	TTTG	TGGG	TGGG	GGGG	TTTG	TGGG	TTTG	TGGG	TTTG	GGGG	TTTG	TGGG	GGGG	GGGG	GGGG	TGGG	TGGG	TTGG
PotVar0009858	A	C	AAAA	AAAC	AAAA	AAAA	AAAC	AAAA	AAAA	AAAA	AAAA	AAAA	AAAA	AAAA	AAAA	AAAA	AAAA	AAAA	AAAC	AAAC	AAAA	AAAA	AAAA	AAAA	AAAA	AAAA	AAAA	AAAA	AAAA	AAAA	AAAA	AAAA	AAAA	AAAA	AAAA	AAAA	AAAA	AAAA	AAAA	AAAA	AAAA	AAAA	AAAA	AAAA	AAAA	AAAA	AAAA	AAAA	AAAA
PotVar0009865	A	G	AAGG	AAAA	AAAG	----	AAAA	AAAG	AGGG	AAAG	AAAG	AAAG	AGGG	----	AGGG	AAAG	AAAG	AGGG	AAGG	AAAG	AAGG	AAAG	AAAG	AAGG	AAAG	----	AAAG	AAAG	AAGG	AAGG	AGGG	AAGG	AAAG	AGGG	AAAG	AAGG	AAGG	AAAG	AGGG	AAGG	AAAG	AGGG	AAAA	AAAA	AAAG	AAAG	AAAG	AAAG	AGGG
PotVar0009867	T	C	----	----	----	----	----	----	----	----	----	----	----	----	----	----	----	----	----	----	----	----	----	----	----	----	----	----	----	----	----	----	----	----	----	----	----	----	----	----	----	----	----	----	----	----	----	----	----
PotVar0009882	A	G	AGGG	AAAA	AAAG	AAAG	AAAA	AAAA	AAGG	AAAA	AAAA	AAAA	AAAG	AAAG	AAAG	AAAA	AAAA	AGGG	AAGG	AAAA	AAAG	AAAA	AAAG	AAGG	AAAG	AAGG	AAAG	AAAG	AAGG	AAGG	AAGG	AAAG	AAAA	AGGG	AAAG	AAGG	AAAG	AAAG	AAAG	AAGG	AAAA	AAGG	AAAA	AAAA	AAAA	AAAA	AAAA	AAAG	AAGG
PotVar0009883	T	C	TTTT	TTTT	TTTT	TTTT	TTTT	TTTT	TTTT	TTTT	TTTT	TTTT	TTTT	TTTT	TTTT	TTTT	TTTT	TTTT	TTTT	TTTT	TTTT	TTTT	TTTT	TTTT	TTTT	TTTT	TTTT	TTTT	TTTT	TTTT	TTTT	TTTT	TTTT	TTTT	TTTT	TTTT	TTTT	TTTT	TTTT	TTTT	TTTT	TTTT	TTTT	TTTT	TTTT	TTTT	TTTT	TTTT	TTTT
PotVar0009886	T	C	CCCC	CCCC	CCCC	CCCC	CCCC	CCCC	CCCC	CCCC	TCCC	CCCC	CCCC	CCCC	CCCC	CCCC	CCCC	CCCC	CCCC	CCCC	CCCC	CCCC	CCCC	CCCC	CCCC	CCCC	CCCC	CCCC	CCCC	CCCC	CCCC	TCCC	CCCC	CCCC	CCCC	CCCC	CCCC	CCCC	CCCC	CCCC	CCCC	CCCC	CCCC	CCCC	CCCC	CCCC	CCCC	CCCC	CCCC
PotVar0009894	T	C	TTTC	TTTT	TTTC	TTTC	TTTT	TTTT	TTTC	TTTT	TTTT	TTTT	TTTC	TTTC	TTTC	TTTT	TTTT	TTCC	TTCC	TTTT	TTTC	TTTT	TTTC	TTTC	TTTT	TTTC	TTTC	TTTC	TTTC	TTCC	TTCC	TTTC	TTTT	TTTC	TTTT	TTCC	TTTC	TTTC	TTTC	TTCC	TTTT	TTCC	TTTT	TTTT	TTTT	TTTT	TTTT	TTTT	----
PotVar0009896	T	C	----	----	----	----	----	----	----	----	----	----	----	----	----	----	----	----	----	----	----	----	----	----	----	----	----	----	----	----	----	----	----	----	----	----	----	----	----	----	----	----	----	----	----	----	----	----	----
PotVar0009917	T	C	TCCC	TTCC	TTTC	TTCC	TTTC	TTTC	TTCC	TTCC	TTTC	TTTC	TTCC	TTTC	TTTC	TTCC	TTCC	TCCC	CCCC	TTTC	TTCC	TTTT	TTCC	TTCC	TTTC	TCCC	TCCC	TCCC	TCCC	TCCC	TTCC	TTCC	TTTC	TCCC	TTTC	TCCC	TTTC	CCCC	TTTC	TCCC	TTTT	TCCC	TTTC	TTTC	TTTT	TTTT	TTTT	TTCC	TCCC
PotVar0009928	T	C	TTTT	TTCC	TTTT	TTTC	TTTC	TTTC	TTTT	TTCC	TTTC	TTTC	TTTC	TTTT	TTTT	TTCC	TTCC	TTTT	TTCC	TTTC	TTTC	TTTT	TTTC	TTTT	TTTT	TTTC	TTCC	TTCC	TTTC	TTTC	TTTT	TTTC	TTTC	TTTT	TTTT	TTTC	TTTT	TCCC	TTTT	TTTC	TTTT	TTTC	TTTC	TTTC	TTTT	TTTT	TTTT	TTTC	TTTC
PotVar0009937	A	G	GGGG	AGGG	GGGG	GGGG	AGGG	GGGG	GGGG	GGGG	GGGG	GGGG	GGGG	GGGG	GGGG	GGGG	AGGG	GGGG	AGGG	AGGG	GGGG	GGGG	GGGG	GGGG	GGGG	AGGG	GGGG	GGGG	AGGG	AGGG	GGGG	GGGG	GGGG	GGGG	GGGG	AGGG	GGGG	GGGG	GGGG	GGGG	GGGG	GGGG	GGGG	GGGG	GGGG	GGGG	GGGG	AGGG	GGGG
PotVar0009943	A	G	GGGG	GGGG	GGGG	GGGG	GGGG	GGGG	GGGG	GGGG	GGGG	GGGG	GGGG	GGGG	GGGG	GGGG	GGGG	GGGG	GGGG	GGGG	GGGG	GGGG	GGGG	GGGG	GGGG	GGGG	GGGG	GGGG	GGGG	GGGG	GGGG	GGGG	GGGG	GGGG	GGGG	GGGG	GGGG	GGGG	GGGG	GGGG	GGGG	GGGG	GGGG	GGGG	GGGG	GGGG	GGGG	GGGG	GGGG
PotVar0009949	A	C	AAAA	AAAC	AAAA	AAAC	AAAA	AAAC	AAAA	AACC	AAAC	AAAC	AAAC	AAAA	AAAA	AACC	AAAC	AAAA	AAAC	AAAA	AAAC	AAAA	AAAC	AAAA	AAAA	AAAA	AACC	AACC	AAAA	----	AAAA	AAAC	AAAC	AAAA	AAAA	AAAA	AAAA	ACCC	AAAA	AAAC	AAAA	AAAC	AAAC	AAAC	AAAA	AAAA	AAAA	AAAA	AAAC
PotVar0009951	T	C	TTCC	TTTT	TTTT	TTTT	TTTT	TTTT	TTTC	TTTT	TTTT	TTTT	TTTT	TTTT	TTTT	TTTT	TTTT	TTTC	TTTT	TTTT	TTTT	TTTT	TTTT	TTTC	TTTC	TTTC	TTTT	TTTT	TTTC	TTTT	TTTT	TTTT	TTTT	TTCC	TTTC	TTTT	TTTT	TTTT	TTTT	TTTT	TTTT	TTTT	TTTT	TTTT	TTTT	TTTT	TTTT	TTTC	TTTT
PotVar0009955	T	C	CCCC	TCCC	CCCC	TCCC	CCCC	TCCC	TCCC	TTCC	TCCC	TCCC	TCCC	CCCC	TTCC	TTCC	TTCC	CCCC	TCCC	CCCC	TTCC	CCCC	TCCC	CCCC	CCCC	CCCC	TTCC	TTCC	CCCC	TCCC	TCCC	TCCC	TCCC	CCCC	CCCC	CCCC	CCCC	TTTC	CCCC	TCCC	CCCC	TCCC	TCCC	TCCC	CCCC	CCCC	CCCC	CCCC	TCCC
PotVar0009977	T	C	TTTT	TTTC	TTTT	TTTT	TTTC	TTTT	TTTT	TTTT	TTTT	TTTT	TTTT	TTTT	TTTT	TTTT	TTTT	TTTT	TTTC	TTTC	TTTT	TTTT	TTTT	TTTT	TTTT	TTTT	TTTT	TTTT	TTTT	TTTT	TTTT	TTTT	TTTT	TTTT	TTTT	TTTT	TTTT	TTTT	TTTT	TTTT	TTTT	TTTT	TTTT	TTTT	TTTT	TTTT	TTTT	TTTT	TTTT
PotVar0009997	T	C	CCCC	CCCC	CCCC	CCCC	CCCC	CCCC	TCCC	CCCC	CCCC	CCCC	CCCC	CCCC	TTCC	CCCC	TCCC	CCCC	CCCC	CCCC	TCCC	CCCC	CCCC	CCCC	CCCC	CCCC	CCCC	CCCC	CCCC	CCCC	TCCC	CCCC	CCCC	CCCC	CCCC	TCCC	CCCC	CCCC	CCCC	CCCC	CCCC	CCCC	CCCC	CCCC	CCCC	CCCC	CCCC	CCCC	CCCC
PotVar0010007	A	G	AAGG	AGGG	GGGG	GGGG	AGGG	GGGG	AGGG	GGGG	GGGG	GGGG	GGGG	GGGG	GGGG	GGGG	GGGG	AGGG	AGGG	AGGG	GGGG	GGGG	GGGG	----	AGGG	AGGG	GGGG	GGGG	AGGG	GGGG	GGGG	GGGG	GGGG	AAGG	AGGG	GGGG	GGGG	GGGG	GGGG	GGGG	GGGG	GGGG	GGGG	GGGG	GGGG	GGGG	GGGG	AGGG	GGGG
PotVar0010012	T	G	TTTT	TTGG	TTTT	TTTG	TTTG	TTTT	TTTT	TTTG	TTTG	TTTT	TTTG	TTTT	TTTT	TTGG	TTGG	TTTT	TTGG	TTTG	TTTG	TTTT	TTTG	TTTT	TTTT	TTTG	TTTG	TTTG	TTTG	TTTG	TTTT	TTTG	TTTG	TTTT	TTTT	TTTG	TTTT	TGGG	TTTT	TTTG	TTTT	TTTG	TTTG	TTTG	TTTT	TTTT	TTTT	TTTG	TTTG
PotVar0010024	T	G	GGGG	TGGG	GGGG	GGGG	TGGG	GGGG	GGGG	GGGG	GGGG	GGGG	GGGG	GGGG	GGGG	TGGG	GGGG	GGGG	TGGG	TGGG	GGGG	GGGG	GGGG	GGGG	GGGG	GGGG	GGGG	GGGG	GGGG	GGGG	GGGG	GGGG	GGGG	GGGG	GGGG	TGGG	GGGG	GGGG	GGGG	GGGG	GGGG	GGGG	GGGG	GGGG	GGGG	GGGG	GGGG	GGGG	GGGG
PotVar0010033	T	G	TGGG	GGGG	GGGG	GGGG	GGGG	GGGG	TGGG	GGGG	GGGG	GGGG	GGGG	GGGG	GGGG	GGGG	GGGG	TGGG	GGGG	GGGG	GGGG	GGGG	GGGG	TGGG	TGGG	TGGG	GGGG	GGGG	GGGG	GGGG	GGGG	GGGG	GGGG	TGGG	TGGG	GGGG	GGGG	GGGG	GGGG	GGGG	GGGG	GGGG	GGGG	GGGG	GGGG	GGGG	GGGG	TGGG	GGGG
PotVar0010064	A	G	AGGG	AAGG	AAAG	AGGG	AAAG	AAGG	AGGG	GGGG	AAGG	AAGG	AGGG	AAGG	AGGG	AAGG	AGGG	AGGG	GGGG	AAAG	AGGG	AAAG	AAGG	AAAG	AAAA	AAGG	AGGG	AGGG	AGGG	AGGG	AGGG	AGGG	AAGG	AGGG	AAAA	AGGG	AAGG	GGGG	AGGG	AAGG	AAAG	GGGG	AAAG	AAAG	AAAG	AAAG	AAAA	AAAG	AGGG
PotVar0010070	T	C	TTTT	TTTC	TTTT	TTTC	TTTT	TTTT	TTTT	TTTT	TTTC	TTTT	TTTT	TTTT	TTTT	TTTT	TTTC	TTTT	TTTT	TTTT	TTTT	TTTT	TTTT	TTTT	TTTT	TTTT	TTTT	TTTT	TTTT	TTTT	TTTT	TTTT	TTTT	TTTT	TTTT	TTTT	TTTT	TTTT	TTTT	TTTT	TTTT	TTTT	TTTT	TTTT	TTTT	TTTT	TTTT	TTTT	TTTC
PotVar0010072	T	C	CCCC	CCCC	CCCC	CCCC	CCCC	CCCC	CCCC	CCCC	CCCC	CCCC	CCCC	CCCC	CCCC	CCCC	CCCC	CCCC	CCCC	CCCC	CCCC	CCCC	CCCC	CCCC	CCCC	CCCC	CCCC	CCCC	CCCC	CCCC	CCCC	CCCC	CCCC	CCCC	CCCC	CCCC	CCCC	CCCC	CCCC	CCCC	CCCC	CCCC	CCCC	CCCC	CCCC	CCCC	CCCC	CCCC	CCCC
PotVar0010076	T	C	TTTC	TTCC	TTTT	TTTC	TTTC	TTTT	TTTC	TTTC	TTTC	TTTT	TTTC	TTTT	TTTT	TTCC	TTTC	TTTC	TTCC	TTTC	TTTC	TTTT	TTTC	TTTT	TTTT	TTTC	TTTC	TTTC	TTTT	TTTC	TTTT	TTTC	TTTC	TTTC	TTTT	TTTC	TTTT	TCCC	TTTT	TTTC	TTTT	TTTC	TTTC	TTTC	TTTT	TTTT	TTTT	TTTC	TTTC
PotVar0010077	A	G	GGGG	GGGG	GGGG	GGGG	GGGG	GGGG	GGGG	GGGG	AGGG	GGGG	GGGG	GGGG	GGGG	GGGG	GGGG	GGGG	GGGG	GGGG	GGGG	GGGG	GGGG	GGGG	GGGG	GGGG	GGGG	GGGG	GGGG	GGGG	GGGG	AGGG	GGGG	GGGG	GGGG	GGGG	GGGG	GGGG	GGGG	GGGG	GGGG	GGGG	GGGG	GGGG	GGGG	GGGG	GGGG	GGGG	GGGG
PotVar0010079	A	C	AAAC	AAAA	AAAC	AAAC	AAAA	AAAA	AAAC	AAAA	AAAA	AAAA	AAAC	AAAC	AAAC	AAAA	AAAA	AAAC	AACC	AAAA	AAAC	AAAA	AAAA	AAAC	AAAA	AACC	AAAC	AAAC	AAAA	AACC	AACC	AAAC	AAAA	AAAA	AAAA	AACC	AAAC	AAAC	AAAC	AAAA	AAAA	AACC	AAAA	AAAA	AAAA	AAAA	AAAA	AAAA	AACC
PotVar0010080	T	C	TTTT	TTTT	TTTT	TTTT	TTTT	TTTT	TTTT	TTTT	TTTT	TTTT	TTTT	TTTT	TTTT	TTTT	TTTT	TTTT	TTTT	TTTT	TTTT	TTTT	TTTT	TTTT	TTTT	TTTT	TTTT	TTTT	TTTT	TTTT	TTTT	TTTT	TTTT	TTTT	TTTT	TTTT	TTTT	TTTT	TTTT	TTTT	TTTT	TTTT	TTTT	TTTT	TTTT	TTTT	TTTT	TTTT	TTTT
PotVar0010082	T	C	CCCC	TCCC	CCCC	CCCC	TCCC	CCCC	CCCC	CCCC	CCCC	CCCC	CCCC	CCCC	CCCC	TCCC	CCCC	CCCC	TCCC	TCCC	CCCC	CCCC	CCCC	CCCC	CCCC	CCCC	CCCC	CCCC	CCCC	CCCC	CCCC	CCCC	CCCC	CCCC	CCCC	----	CCCC	CCCC	CCCC	CCCC	CCCC	CCCC	CCCC	CCCC	CCCC	CCCC	CCCC	CCCC	CCCC
PotVar0010102	A	G	AAGG	AAGG	AAAG	AAGG	AAAG	AAAA	AAGG	AAAG	AAAG	AAAA	AAGG	AAAG	AAAG	AAGG	AAAG	AAGG	GGGG	AAAG	AAGG	AAAA	AAAG	AAAG	AAAA	AGGG	AAGG	AAGG	AAAA	AGGG	AAGG	AAGG	AAAG	AAAG	AAAA	AGGG	AAAG	GGGG	AAAG	AAAG	AAAG	AGGG	AAAG	AAAG	AAAA	AAAA	AAAA	AAAG	AGGG
PotVar0010106	T	C	TTTC	TTCC	TTTT	TTTC	TTTC	TTTC	TTTC	TTTC	TTTC	TTTT	TTTC	TTTT	TTTT	TTCC	TCCC	TTTC	TTCC	TTTC	TTTC	TTTT	TTTC	TTTT	TTTT	TTCC	TTTC	TTTC	TTTC	----	TTTT	TTTC	TTTC	TTTC	TTTT	TTTC	TTTT	TCCC	TTTT	TTTC	TTTT	TTTC	TTTC	TTTC	TTTT	TTTT	TTTT	TTCC	TTTC
PotVar0010115	A	G	AAAA	AAAA	AAAA	AAAA	AAAA	AAAA	AAAA	AAAA	AAAG	AAAA	AAAA	AAAA	AAAA	AAAA	AAAA	AAAA	AAAA	AAAA	AAAA	AAAA	AAAA	AAAA	AAAA	AAAA	AAAA	AAAA	AAAA	AAAA	AAAA	AAAG	AAAA	AAAA	AAAA	AAAA	AAAA	AAAA	AAAA	AAAA	AAAA	AAAA	AAAA	AAAA	AAAA	AAAA	AAAA	AAAA	AAAA
PotVar0010133	A	G	----	----	----	----	----	----	----	----	----	----	----	----	----	----	----	----	----	----	----	----	----	----	----	----	----	----	----	----	----	----	----	----	----	----	----	----	----	----	----	----	----	----	----	----	----	----	----
PotVar0010135	T	C	TTCC	TTCC	TTTT	TTCC	TTTC	TTCC	TTCC	CCCC	TTCC	TTCC	TTCC	TTTC	TTCC	TTCC	TCCC	TTCC	TTCC	TTTC	TTCC	TTTC	TTCC	TTTT	TTTC	TTCC	TCCC	TCCC	TCCC	----	TTTT	TTCC	TTCC	CCCC	TTTC	TTTC	TTTC	TCCC	TTCC	TTTC	TTTC	TTCC	TTTC	TTTC	TTTC	TTCC	TTTT	TTCC	TTTC
PotVar0010145	T	C	CCCC	CCCC	CCCC	CCCC	CCCC	CCCC	CCCC	CCCC	CCCC	CCCC	CCCC	CCCC	CCCC	CCCC	CCCC	CCCC	CCCC	CCCC	CCCC	CCCC	CCCC	CCCC	CCCC	CCCC	CCCC	CCCC	CCCC	CCCC	CCCC	CCCC	CCCC	CCCC	CCCC	CCCC	CCCC	CCCC	CCCC	CCCC	CCCC	CCCC	CCCC	CCCC	CCCC	CCCC	CCCC	CCCC	CCCC
PotVar0010147	A	G	AAAG	AAAG	AAAA	AAGG	AAAG	AAAG	AAGG	GGGG	AAGG	AAGG	AAGG	AAAG	AAGG	AAAG	AGGG	AAGG	AAGG	AAAG	AAGG	AAAG	AAGG	AAAA	AAAG	AAGG	AGGG	AGGG	AAGG	AAAG	AAAA	AAGG	AAGG	AGGG	AAAG	AAAG	AAAG	AGGG	AAGG	AAAG	AAAG	AAGG	AAAG	AAAG	AAAG	AAGG	AAAA	AAGG	AAAG
PotVar0010158	A	G	AAAG	AAAA	AAAA	AAAA	AAAA	AAAA	AAAA	AAAA	AAAA	AAAA	AAAA	AAAA	AAAA	AAAA	AAAA	AAAA	AAAA	AAAA	AAAA	AAAA	AAAA	AAAA	AAAA	AAAA	AAAA	AAAA	AAAG	AAAA	AAAA	AAAA	AAAA	AAAG	AAAA	AAAA	AAAA	AAAA	AAAA	AAAA	AAAA	AAAA	AAAA	AAAA	AAAA	AAAA	AAAA	AAAA	AAAA
PotVar0010183	T	C	----	----	----	----	----	----	----	----	----	----	----	----	----	----	----	----	----	----	----	----	----	----	----	----	----	----	----	----	----	----	----	----	----	----	----	----	----	----	----	----	----	----	----	----	----	----	----
PotVar0010184	A	C	----	----	----	----	----	----	----	----	----	----	----	----	----	----	----	----	----	----	----	----	----	----	----	----	----	----	----	----	----	----	----	----	----	----	----	----	----	----	----	----	----	----	----	----	----	----	----
PotVar0010195	T	G	GGGG	GGGG	GGGG	GGGG	GGGG	GGGG	GGGG	GGGG	GGGG	GGGG	GGGG	GGGG	GGGG	GGGG	GGGG	GGGG	GGGG	GGGG	GGGG	GGGG	GGGG	GGGG	GGGG	GGGG	GGGG	GGGG	GGGG	GGGG	GGGG	GGGG	GGGG	GGGG	GGGG	GGGG	----	GGGG	GGGG	GGGG	GGGG	GGGG	GGGG	GGGG	GGGG	GGGG	GGGG	GGGG	GGGG
PotVar0010199	T	G	GGGG	GGGG	GGGG	GGGG	GGGG	GGGG	GGGG	GGGG	GGGG	GGGG	GGGG	GGGG	GGGG	GGGG	GGGG	GGGG	GGGG	GGGG	GGGG	GGGG	GGGG	GGGG	GGGG	GGGG	GGGG	GGGG	GGGG	GGGG	GGGG	GGGG	GGGG	GGGG	GGGG	GGGG	GGGG	GGGG	GGGG	GGGG	GGGG	GGGG	GGGG	GGGG	GGGG	GGGG	GGGG	GGGG	GGGG
PotVar0010209	T	G	TTGG	TTTT	TTTG	TTGG	TTTT	TTTG	TTGG	TTTG	TTTT	TTTG	TTGG	TTGG	TTTG	TTTT	TTTT	TTGG	TTGG	TTTT	TTTG	TTTG	TTTT	TTTG	TTTT	TTTT	TTTG	TTTG	TTTT	----	TGGG	TTTG	TTTG	TTTG	TTTT	TTGG	TGGG	TTTG	TTGG	TTTT	TTTT	TTGG	TTTT	TTTT	TTTG	TTTG	TTTT	TTTG	TTGG
PotVar0010211	T	C	CCCC	CCCC	CCCC	TCCC	CCCC	TCCC	CCCC	TCCC	CCCC	TCCC	TCCC	TCCC	CCCC	CCCC	CCCC	CCCC	CCCC	CCCC	CCCC	TCCC	CCCC	CCCC	CCCC	CCCC	CCCC	CCCC	CCCC	CCCC	TCCC	CCCC	TCCC	CCCC	CCCC	CCCC	TCCC	CCCC	TTCC	CCCC	CCCC	CCCC	CCCC	CCCC	TCCC	TCCC	CCCC	CCCC	CCCC
PotVar0010269	A	C	AAAA	AAAA	AAAA	AAAA	AAAA	AAAA	AAAA	AAAA	AAAA	AAAA	AAAA	AAAA	AAAA	AAAA	AAAA	AAAA	AAAA	AAAA	AAAA	AAAA	AAAA	AAAA	AAAA	AAAA	AAAA	AAAA	AAAA	AAAA	AAAA	AAAA	AAAA	AAAA	AAAA	AAAA	AAAA	AAAA	AAAA	AAAA	AAAA	AAAA	AAAA	AAAA	AAAA	AAAA	AAAA	AAAA	AAAC
PotVar0010270	A	G	AGGG	GGGG	AGGG	AGGG	GGGG	GGGG	AGGG	GGGG	GGGG	GGGG	AGGG	AGGG	AGGG	GGGG	GGGG	AGGG	AAGG	GGGG	AGGG	GGGG	GGGG	AGGG	GGGG	GGGG	AGGG	AGGG	GGGG	AAGG	AAGG	AGGG	GGGG	GGGG	GGGG	AAGG	AGGG	AGGG	GGGG	GGGG	GGGG	AAGG	GGGG	GGGG	GGGG	GGGG	GGGG	GGGG	AAGG
PotVar0010278	T	G	GGGG	GGGG	GGGG	GGGG	TGGG	GGGG	GGGG	TGGG	GGGG	GGGG	TGGG	GGGG	GGGG	TGGG	GGGG	GGGG	TTGG	TGGG	TGGG	GGGG	TGGG	GGGG	GGGG	GGGG	TGGG	TGGG	GGGG	----	GGGG	TGGG	TGGG	GGGG	GGGG	GGGG	GGGG	TTGG	GGGG	TTGG	GGGG	TGGG	TGGG	TGGG	GGGG	GGGG	GGGG	GGGG	GGGG
PotVar0010288	T	G	TTGG	TTTG	TTGG	TGGG	TTTG	TTGG	TGGG	TGGG	TTTG	TTGG	TGGG	TGGG	TGGG	TTTG	TGGG	TGGG	GGGG	TTTG	TGGG	TGGG	TTGG	TTGG	TTTG	TTGG	TGGG	TGGG	TTGG	TGGG	TGGG	TGGG	TTGG	TTGG	TTTG	TGGG	TGGG	GGGG	TTGG	TTGG	TTTT	GGGG	TTTG	TTTG	TTTG	TTTG	TGGG	TGGG	TGGG
PotVar0010303	A	G	GGGG	AGGG	GGGG	AGGG	GGGG	GGGG	GGGG	GGGG	AGGG	GGGG	GGGG	AGGG	GGGG	GGGG	AGGG	GGGG	GGGG	GGGG	GGGG	GGGG	GGGG	GGGG	GGGG	GGGG	GGGG	GGGG	GGGG	GGGG	GGGG	GGGG	GGGG	GGGG	GGGG	GGGG	AGGG	GGGG	GGGG	GGGG	GGGG	GGGG	GGGG	GGGG	GGGG	GGGG	GGGG	GGGG	GGGG
PotVar0010331	T	C	CCCC	CCCC	CCCC	CCCC	CCCC	CCCC	CCCC	CCCC	CCCC	CCCC	CCCC	CCCC	CCCC	CCCC	CCCC	CCCC	CCCC	CCCC	CCCC	CCCC	CCCC	CCCC	CCCC	CCCC	CCCC	CCCC	CCCC	CCCC	CCCC	CCCC	CCCC	CCCC	CCCC	CCCC	CCCC	CCCC	CCCC	CCCC	CCCC	CCCC	CCCC	CCCC	CCCC	CCCC	CCCC	CCCC	CCCC
PotVar0010333	T	C	CCCC	CCCC	TCCC	CCCC	CCCC	TCCC	TCCC	TCCC	CCCC	TCCC	CCCC	CCCC	TTCC	CCCC	TCCC	TCCC	CCCC	CCCC	TCCC	CCCC	TCCC	CCCC	CCCC	CCCC	TCCC	TCCC	TCCC	CCCC	CCCC	CCCC	CCCC	TCCC	CCCC	CCCC	CCCC	CCCC	CCCC	CCCC	CCCC	TCCC	CCCC	CCCC	CCCC	CCCC	CCCC	CCCC	CCCC
PotVar0010345	T	C	TTTC	TTTT	TTTC	TTTC	TTTT	TTTT	TTTC	TTTT	TTTT	TTTT	TTTC	TTTC	TTTC	TTTT	TTTC	TTTC	TTCC	TTTT	TTTC	TTCC	TTTT	TTCC	TTTC	TTCC	TTTC	TTTC	TTTC	----	TTCC	TTCC	TTTT	TTTT	TTTC	TTCC	TTTC	TTCC	TTTT	TTTT	TTTT	TTCC	TTTT	TTTT	TTTT	TTTT	TCCC	TTCC	TTCC
PotVar0010350	A	G	AAAA	AAAA	AAAG	AAAA	AAAA	AAAG	AAAG	AAAG	AAAA	AAAG	AAAA	AAAA	AAGG	AAAA	AAAG	AAAG	AAAA	AAAA	AAAG	AAAA	AAAG	AAAA	AAAA	AAAA	AAAG	AAAG	AAAG	AAAA	AAAA	AAAA	AAAA	AAAG	AAAA	AAAA	AAAG	AAAA	AAAA	AAAA	AAAA	AAAG	AAAA	AAAA	AAAA	AAAA	AAAA	AAAA	AAAA
PotVar0010351	T	C	TCCC	CCCC	CCCC	CCCC	CCCC	CCCC	TCCC	CCCC	CCCC	CCCC	CCCC	CCCC	CCCC	CCCC	CCCC	TCCC	CCCC	CCCC	CCCC	CCCC	CCCC	CCCC	CCCC	CCCC	CCCC	CCCC	CCCC	CCCC	CCCC	CCCC	CCCC	TCCC	CCCC	CCCC	TCCC	CCCC	CCCC	CCCC	CCCC	CCCC	CCCC	CCCC	CCCC	CCCC	CCCC	TCCC	CCCC
PotVar0010353	A	C	AAAA	AAAA	AAAA	AAAA	AAAA	AAAA	AAAA	AAAA	AAAA	AAAA	AAAA	AAAA	AAAA	AAAA	AAAA	AAAA	AAAA	AAAA	AAAA	AACC	AAAA	AAAC	AAAC	AAAC	AAAA	AAAA	AAAA	AAAA	AAAA	AAAA	AAAA	AAAA	AAAC	AAAA	AAAA	AAAA	AAAA	AAAA	AAAA	AAAA	AAAA	AAAA	AAAA	AAAA	ACCC	AAAC	AAAA
PotVar0010377	T	C	TTCC	TCCC	TTCC	TTTC	TCCC	TTCC	TTTC	TTTC	----	TTCC	TTTC	TTTC	TTTC	TCCC	TTTC	TTTC	TTTT	TCCC	TTTC	TCCC	TTCC	TCCC	CCCC	TCCC	TTTC	TTTC	TTCC	TTTC	TTTC	TTTC	TTCC	TTCC	CCCC	TTTC	TTTC	TTTT	TTCC	----	TCCC	TTTC	TCCC	TCCC	TCCC	TCCC	CCCC	TTCC	TTTC
PotVar0010382	A	G	AAAA	AAAA	AAAA	AAAA	AAAA	AAAA	AAAA	AAAA	AAAA	AAAA	AAAA	AAAA	AAAA	AAAA	AAAA	AAAA	AAAA	AAAA	AAAA	AAAA	AAAA	AAAA	AAAA	AAAA	AAAA	AAAA	AAAA	AAAA	AAAA	AAAA	AAAA	AAAA	AAAA	AAAA	AAAA	AAAA	AAAA	AAAA	AAAA	AAAA	AAAA	AAAA	AAAA	AAAA	AAAA	AAAA	AAAG
PotVar0010400	A	G	AAAG	AAAA	AAAA	AAAA	AAAA	AAAA	AAAG	AAAA	AAAA	AAAA	AAAA	AAAA	AAAA	AAAA	AAAG	AAAG	AAAA	AAAA	AAAA	AAAA	AAAA	AAAA	AAAA	AAAG	AAAA	AAAA	AAAG	AAAG	AAAA	AAAG	AAAA	AAAG	AAAA	AAAA	AAAG	AAAG	AAAA	AAAA	AAAA	AAAA	AAAA	AAAA	AAAA	AAAA	AAAA	AAGG	AAAA
PotVar0010401	T	C	TTCC	TTTT	TTTC	TTCC	TTTT	TTTC	TTCC	TTTC	TTTT	TTTC	TTCC	TTCC	TTTC	TTTT	TTTC	TTCC	TTCC	TTTT	TTTC	TTTC	TTTT	TTTC	TTTT	TTTC	TTTC	TTTC	TTTC	----	TCCC	TTCC	TTTC	TTTC	TTTT	TTCC	TCCC	TTCC	TTCC	TTTT	TTTC	TTTC	TTTT	TTTT	TTTC	TTTC	TTTT	TTCC	TTCC
PotVar0010429	A	G	GGGG	AGGG	AGGG	AGGG	AGGG	----	AGGG	AAGG	AGGG	AGGG	AGGG	AGGG	AAGG	AGGG	AAGG	AGGG	AAGG	AGGG	AAGG	GGGG	AAGG	GGGG	GGGG	GGGG	AAGG	AAGG	AGGG	GGGG	GGGG	AGGG	AGGG	AGGG	GGGG	AGGG	GGGG	AAGG	GGGG	AAGG	GGGG	AAGG	----	AGGG	GGGG	GGGG	GGGG	GGGG	AGGG
PotVar0010500	T	C	CCCC	CCCC	CCCC	CCCC	CCCC	CCCC	CCCC	CCCC	TCCC	CCCC	CCCC	CCCC	CCCC	CCCC	CCCC	CCCC	CCCC	CCCC	CCCC	TTCC	CCCC	TCCC	TCCC	TCCC	CCCC	CCCC	CCCC	CCCC	CCCC	CCCC	CCCC	CCCC	TCCC	CCCC	CCCC	CCCC	CCCC	CCCC	CCCC	CCCC	CCCC	CCCC	CCCC	CCCC	TTTC	TCCC	CCCC
PotVar0010523	T	G	TTTT	TTTT	TTTG	TTTT	TTTG	TTTG	TTTG	TTGG	TTTT	TTTG	TTTG	TTTT	TTGG	TTTG	TTTG	TTTG	TTGG	TTTG	TTGG	TTTT	TTTG	TTTT	TTTT	TTTT	TTGG	TTGG	TTTG	TTTG	TTTT	TTTG	TTTT	TTTG	TTTT	TTTT	TTTT	TTGG	TTTT	TTGG	TTTT	TTGG	TTTG	TTTG	TTTT	TTTT	TTTT	TTTT	TTTT
PotVar0010531	T	C	TCCC	CCCC	CCCC	CCCC	CCCC	CCCC	TCCC	CCCC	CCCC	CCCC	CCCC	CCCC	CCCC	CCCC	CCCC	TCCC	CCCC	CCCC	CCCC	CCCC	CCCC	CCCC	CCCC	CCCC	CCCC	CCCC	CCCC	CCCC	CCCC	CCCC	CCCC	TCCC	CCCC	CCCC	CCCC	CCCC	CCCC	CCCC	CCCC	CCCC	CCCC	CCCC	CCCC	CCCC	CCCC	TCCC	CCCC
PotVar0010535	T	C	CCCC	CCCC	CCCC	CCCC	CCCC	CCCC	CCCC	CCCC	CCCC	CCCC	CCCC	CCCC	CCCC	CCCC	CCCC	CCCC	CCCC	CCCC	CCCC	CCCC	CCCC	CCCC	CCCC	CCCC	CCCC	CCCC	CCCC	CCCC	CCCC	CCCC	CCCC	CCCC	CCCC	CCCC	CCCC	CCCC	CCCC	CCCC	CCCC	CCCC	CCCC	CCCC	CCCC	CCCC	CCCC	CCCC	CCCC
PotVar0010536	T	C	TTCC	TCCC	TTTC	TTTC	TCCC	TTCC	TCCC	TCCC	CCCC	TTCC	TTCC	TTTC	TCCC	CCCC	CCCC	TCCC	TTCC	TCCC	TTCC	TTTT	TCCC	TTTC	TTCC	TCCC	TTCC	TTCC	CCCC	TTCC	TTTC	TCCC	TTTT	TCCC	TTCC	TTTC	TTCC	TCCC	TTTC	TTCC	TTTC	TCCC	TCCC	TCCC	TTCC	TTCC	TTTT	TCCC	TTTC
PotVar0010538	T	C	CCCC	TTCC	CCCC	CCCC	TTCC	TCCC	TCCC	TCCC	TTCC	TCCC	TCCC	CCCC	TCCC	TTTC	TCCC	TCCC	CCCC	TTCC	CCCC	CCCC	TTCC	----	TTCC	TTCC	CCCC	CCCC	TCCC	TCCC	TCCC	TCCC	CCCC	CCCC	TTCC	CCCC	TCCC	CCCC	TCCC	CCCC	TCCC	TCCC	TTCC	TTCC	TTCC	TTCC	CCCC	TCCC	CCCC
PotVar0010539	T	G	TTTT	TTTT	TTTT	TTTT	TTTT	TTTT	TTTT	TTTT	TTTT	TTTT	TTTT	TTTT	TTTT	TTTT	TTTT	TTTT	TTTT	TTTT	TTTT	TTTT	TTTT	TTTT	TTTT	TTTT	TTTT	TTTT	TTTT	TTTT	TTTT	TTTT	TTTT	TTTT	TTTT	TTTT	TTTT	TTTT	TTTT	TTTT	TTTT	TTTT	TTTT	TTTT	TTTT	TTTT	TTTT	TTTT	TTTG
PotVar0010542	T	C	TTCC	TCCC	TTTC	TTTC	TCCC	TTCC	TCCC	TCCC	CCCC	TTCC	TTCC	TTTC	TCCC	CCCC	CCCC	TCCC	TTCC	TCCC	TTCC	TTTT	TCCC	TTCC	TTCC	TCCC	TTCC	TTCC	CCCC	TTCC	TTTC	TCCC	TTTT	TCCC	TTCC	TTTT	TTCC	TCCC	TTTC	TTCC	TTTC	TCCC	TCCC	TCCC	TTCC	TTCC	TTTT	TCCC	TTTT
PotVar0010547	T	C	----	----	----	----	----	----	----	----	----	----	----	----	----	----	----	----	----	----	----	----	----	----	----	----	----	----	----	----	----	----	----	----	----	----	----	----	----	----	----	----	----	----	----	----	----	----	----
PotVar0010550	A	G	----	----	----	----	----	----	----	----	----	----	----	----	----	----	----	----	----	----	----	----	----	----	----	----	----	----	----	----	----	----	----	----	----	----	----	----	----	----	----	----	----	----	----	----	----	----	----
PotVar0010551	T	C	CCCC	TCCC	CCCC	TCCC	CCCC	CCCC	CCCC	CCCC	TCCC	CCCC	CCCC	TCCC	CCCC	CCCC	TCCC	CCCC	CCCC	CCCC	CCCC	CCCC	CCCC	CCCC	CCCC	CCCC	CCCC	CCCC	CCCC	CCCC	CCCC	CCCC	CCCC	CCCC	CCCC	CCCC	CCCC	CCCC	CCCC	CCCC	CCCC	CCCC	CCCC	CCCC	CCCC	CCCC	CCCC	CCCC	CCCC
PotVar0010562	T	C	TTCC	TTTC	TTTC	TTTC	TTTC	TTTC	TTTT	TTTT	TTTT	TTTC	TTTT	TTTC	TTTT	TTTT	TTTT	TTTT	TTTT	TTTC	TTTC	TTTC	TTTC	TTTC	TTTT	TTTT	TTTT	TTTT	TTTT	TTTT	TTTT	TTTT	TTCC	TTTT	TTTT	TTTC	TTTT	TTTT	TTTC	----	TTCC	TTTT	TTTC	TTTC	TTTC	TTTT	TTTC	TTTT	TTTC
PotVar0010568	A	G	----	----	----	----	----	----	----	----	----	----	----	----	----	----	----	----	----	----	----	----	----	----	----	----	----	----	----	----	----	----	----	----	----	----	----	----	----	----	----	----	----	----	----	----	----	----	----
PotVar0010569	A	G	----	----	----	----	----	----	----	----	----	----	----	----	----	----	----	----	----	----	----	----	----	----	----	----	----	----	----	----	----	----	----	----	----	----	----	----	----	----	----	----	----	----	----	----	----	----	----
PotVar0010582	T	G	TTTT	TTTT	TTTT	TTTT	TTTT	TTTT	TTTT	TTTT	TTTT	TTTT	TTTT	TTTT	TTTT	TTTT	TTTT	TTTT	TTTT	TTTT	TTTT	TTTT	TTTT	TTTT	TTTT	TTTT	TTTT	TTTT	TTTT	TTTT	TTTT	TTTT	TTTT	TTTT	TTTT	TTTT	TTTT	TTTT	TTTT	TTTT	TTTT	TTTT	TTTT	TTTT	TTTT	TTTT	TTTT	TTTT	TTTT
PotVar0010586	T	G	TTTT	TTTG	TTTG	TTTG	TTTG	TTTG	TTTG	TTGG	TTTG	TTTG	TTTG	TTTG	TTGG	TTTG	TTGG	TTTG	TTGG	TTTG	TTGG	TTTT	TTTG	TTTT	TTTT	TTTT	TTGG	TTGG	TTTG	----	TTTT	TTTG	TTTT	TTTG	TTTT	TTTT	TTTT	TTGG	TTTT	TTGG	TTTT	TTGG	TTTG	TTTG	TTTT	TTTT	TTTT	TTTT	TTTT
PotVar0010608	T	C	CCCC	CCCC	CCCC	CCCC	CCCC	CCCC	TCCC	CCCC	CCCC	CCCC	TCCC	CCCC	TCCC	CCCC	CCCC	TCCC	TTCC	CCCC	TCCC	CCCC	CCCC	TCCC	CCCC	CCCC	TCCC	TCCC	CCCC	TCCC	CCCC	CCCC	CCCC	CCCC	CCCC	TTCC	TCCC	CCCC	CCCC	CCCC	CCCC	CCCC	CCCC	CCCC	CCCC	CCCC	CCCC	CCCC	TCCC
PotVar0010618	T	G	TTGG	TTGG	TTGG	TTGG	TTGG	TTTG	GGGG	TGGG	TGGG	TTGG	GGGG	TTGG	GGGG	TTGG	GGGG	GGGG	GGGG	TTGG	TGGG	TTTT	TGGG	TTGG	TGGG	TGGG	GGGG	GGGG	TGGG	GGGG	TGGG	GGGG	TTTG	TGGG	TGGG	TGGG	TGGG	GGGG	TTTG	TTGG	TTGG	TGGG	TTGG	TGGG	TTGG	TGGG	TTTT	TGGG	TGGG
PotVar0010629	T	C	----	----	----	----	----	----	----	----	----	----	----	----	----	----	----	----	----	----	----	----	----	----	----	----	----	----	----	----	----	----	----	----	----	----	----	----	----	----	----	----	----	----	----	----	----	----	----
PotVar0010664	T	C	CCCC	TCCC	TCCC	TCCC	TCCC	CCCC	TCCC	TCCC	TTCC	TCCC	TTCC	TCCC	TCCC	TCCC	TCCC	TCCC	CCCC	TCCC	CCCC	TTCC	TTCC	TTCC	TTTC	TTTC	CCCC	CCCC	TCCC	TCCC	TTTC	TTCC	CCCC	CCCC	TTTC	CCCC	TCCC	TCCC	TCCC	CCCC	TTCC	TTCC	TCCC	TTCC	TTCC	TTCC	TTCC	TTCC	TCCC
PotVar0010668	A	G	AAAA	AAAA	AAAA	AAAA	AAAA	AAAA	AAAA	AAAA	AAAA	AAAA	AAAA	AAAA	AAAA	AAAA	AAAA	AAAA	AAAA	AAAA	AAAA	AAAA	AAAA	AAAA	AAAA	AAAA	AAAA	AAAA	AAAA	AAAA	AAAA	AAAA	AAAA	AAAA	AAAA	AAAA	AAAA	AAAA	AAAA	AAAA	AAAA	AAAA	AAAA	AAAA	AAAA	AAAA	AAAA	AAAA	AAAA
PotVar0010676	T	C	TTCC	TTTC	TTTC	TTTC	TTTC	TTTC	TCCC	TTCC	TTCC	TTTC	TTCC	TTTC	TCCC	TTTC	TCCC	TCCC	CCCC	TTTC	TCCC	TTCC	TTTC	----	TTCC	TTCC	CCCC	CCCC	TTCC	TCCC	TTCC	TTCC	TTTC	TCCC	TTCC	TCCC	TTCC	TCCC	TTTT	TTCC	TTTC	TTTC	TTTC	TTTC	TTTT	TTTC	TTCC	TCCC	TTCC
PotVar0010677	A	G	GGGG	GGGG	GGGG	GGGG	GGGG	GGGG	GGGG	GGGG	GGGG	GGGG	GGGG	GGGG	GGGG	GGGG	GGGG	GGGG	GGGG	GGGG	GGGG	AAGG	GGGG	AGGG	AGGG	AGGG	GGGG	GGGG	GGGG	GGGG	AAGG	GGGG	GGGG	GGGG	AGGG	GGGG	GGGG	GGGG	GGGG	GGGG	AGGG	GGGG	GGGG	GGGG	GGGG	GGGG	AAGG	AGGG	GGGG
PotVar0010684	A	G	GGGG	AGGG	GGGG	AGGG	GGGG	GGGG	GGGG	GGGG	AGGG	GGGG	GGGG	AGGG	GGGG	GGGG	AGGG	----	GGGG	GGGG	GGGG	GGGG	GGGG	GGGG	AGGG	GGGG	AGGG	AGGG	GGGG	GGGG	GGGG	GGGG	GGGG	AGGG	AGGG	GGGG	GGGG	GGGG	GGGG	GGGG	GGGG	GGGG	GGGG	GGGG	GGGG	AGGG	GGGG	GGGG	GGGG
PotVar0010704	T	C	----	----	----	----	----	----	----	----	----	----	----	----	----	----	----	----	----	----	----	----	----	----	----	----	----	----	----	----	----	----	----	----	----	----	----	----	----	----	----	----	----	----	----	----	----	----	----
PotVar0010735	A	G	GGGG	GGGG	GGGG	GGGG	GGGG	GGGG	GGGG	GGGG	AGGG	GGGG	GGGG	GGGG	GGGG	GGGG	GGGG	GGGG	GGGG	GGGG	GGGG	GGGG	GGGG	GGGG	GGGG	GGGG	GGGG	GGGG	GGGG	GGGG	GGGG	GGGG	GGGG	GGGG	GGGG	GGGG	GGGG	GGGG	GGGG	GGGG	GGGG	GGGG	GGGG	GGGG	GGGG	GGGG	GGGG	GGGG	AGGG
PotVar0010787	A	C	ACCC	CCCC	CCCC	CCCC	ACCC	CCCC	CCCC	ACCC	CCCC	CCCC	ACCC	CCCC	CCCC	ACCC	CCCC	CCCC	AACC	ACCC	ACCC	CCCC	CCCC	CCCC	CCCC	CCCC	ACCC	ACCC	CCCC	ACCC	CCCC	ACCC	ACCC	CCCC	CCCC	CCCC	CCCC	AACC	CCCC	AACC	CCCC	ACCC	ACCC	ACCC	CCCC	CCCC	CCCC	CCCC	ACCC
PotVar0010835	A	G	GGGG	GGGG	GGGG	GGGG	GGGG	GGGG	GGGG	GGGG	GGGG	AGGG	GGGG	GGGG	GGGG	GGGG	GGGG	GGGG	GGGG	GGGG	GGGG	AAGG	GGGG	AGGG	AGGG	AGGG	GGGG	GGGG	GGGG	GGGG	AGGG	GGGG	GGGG	GGGG	AGGG	GGGG	GGGG	GGGG	GGGG	GGGG	GGGG	GGGG	GGGG	GGGG	GGGG	GGGG	AAGG	AGGG	GGGG
PotVar0010836	A	C	AAAA	AAAA	AAAC	AAAA	AAAA	AAAC	AAAA	AAAC	AAAA	AAAC	AAAA	AAAA	AAAA	AAAA	AAAA	AAAC	AAAA	AAAA	AAAA	AAAA	AAAC	AAAA	AAAA	AAAA	AAAC	AAAC	AAAC	AAAA	AAAA	AAAA	AAAA	AAAC	AAAA	AAAA	AAAA	AAAA	AAAA	AAAA	AAAA	AAAA	AAAA	AAAA	AAAA	AAAA	AAAA	AAAA	AAAA
PotVar0010850	A	C	CCCC	CCCC	CCCC	CCCC	CCCC	CCCC	CCCC	CCCC	CCCC	CCCC	CCCC	CCCC	CCCC	CCCC	CCCC	CCCC	CCCC	CCCC	CCCC	CCCC	CCCC	CCCC	CCCC	CCCC	CCCC	CCCC	CCCC	CCCC	CCCC	CCCC	CCCC	CCCC	CCCC	CCCC	CCCC	CCCC	CCCC	CCCC	CCCC	CCCC	CCCC	CCCC	CCCC	CCCC	CCCC	CCCC	CCCC
PotVar0010851	A	G	AAAA	AAAA	AAAA	AAAA	AAAA	AAAA	AAAA	AAAA	AAAA	AAAA	AAAA	AAAA	AAAA	AAAA	AAAA	AAAA	AAAA	AAAA	AAAA	AAAA	AAAA	AAAA	AAAA	AAAA	AAAA	AAAA	AAAA	AAAA	AAAA	AAAA	AAAA	AAAA	AAAA	AAAA	AAAG	AAAA	AAAA	AAAA	AAAA	AAAA	AAAA	AAAA	AAAA	AAAA	AAAA	AAAA	AAAA
PotVar0010866	T	G	----	----	----	----	----	----	----	----	----	----	----	----	----	----	----	----	----	----	----	----	----	----	----	----	----	----	----	----	----	----	----	----	----	----	----	----	----	----	----	----	----	----	----	----	----	----	----
PotVar0010869	A	G	AGGG	AGGG	GGGG	AGGG	GGGG	GGGG	AGGG	GGGG	AGGG	GGGG	GGGG	AGGG	GGGG	GGGG	AGGG	AGGG	GGGG	GGGG	GGGG	GGGG	GGGG	GGGG	AGGG	GGGG	AGGG	AGGG	GGGG	GGGG	GGGG	GGGG	GGGG	AAGG	AGGG	GGGG	GGGG	GGGG	GGGG	GGGG	GGGG	GGGG	GGGG	GGGG	GGGG	AGGG	GGGG	AGGG	GGGG
PotVar0010872	A	G	AAAA	AAAA	AAAA	AAAA	AAAA	AAAA	AAAA	AAAA	AAAA	AAAA	AAAA	AAAA	AAAA	AAAA	AAAA	AAAA	AAAA	AAAA	AAAA	AAAA	AAAA	AAAA	AAAA	AAAA	AAAA	AAAA	AAAA	AAAA	AAAA	AAAA	AAAA	AAAA	AAAA	AAAA	AAAA	AAAA	AAAA	AAAA	AAAA	AAAA	AAAA	AAAA	AAAA	AAAA	AAAA	AAAA	AAAA
PotVar0010874	A	G	GGGG	GGGG	GGGG	GGGG	GGGG	GGGG	GGGG	GGGG	AGGG	GGGG	GGGG	GGGG	GGGG	GGGG	GGGG	GGGG	GGGG	GGGG	GGGG	GGGG	GGGG	GGGG	GGGG	GGGG	GGGG	GGGG	GGGG	GGGG	GGGG	GGGG	GGGG	GGGG	GGGG	GGGG	GGGG	GGGG	GGGG	GGGG	GGGG	GGGG	GGGG	GGGG	GGGG	GGGG	GGGG	GGGG	GGGG
PotVar0010875	T	C	CCCC	CCCC	CCCC	CCCC	CCCC	CCCC	TCCC	CCCC	CCCC	CCCC	CCCC	CCCC	TTCC	CCCC	TCCC	CCCC	CCCC	CCCC	TCCC	CCCC	CCCC	CCCC	CCCC	CCCC	CCCC	CCCC	CCCC	CCCC	CCCC	CCCC	CCCC	CCCC	CCCC	CCCC	CCCC	CCCC	CCCC	CCCC	CCCC	CCCC	CCCC	CCCC	CCCC	CCCC	CCCC	CCCC	CCCC
PotVar0010877	A	G	AAGG	AAAG	AAAG	AAAG	AAAG	AAAG	AGGG	AAGG	AAAG	AGGG	AGGG	AAAG	AGGG	AAAG	AGGG	AGGG	GGGG	AAAG	AGGG	AAGG	AAAG	AAGG	AGGG	AAGG	GGGG	GGGG	AAGG	AGGG	AAGG	AAGG	AAGG	AGGG	AGGG	AAGG	AAGG	AGGG	AAAA	AAGG	AAAG	AAAG	AAAG	AAAG	AAAA	AAAG	AAGG	AGGG	AAGG
PotVar0010878	A	G	AAGG	AAAG	AAAG	AAAG	AAAG	AAAG	AAAG	AAGG	AAAG	AAGG	AAAG	AAAG	AAAA	AAAG	AGGG	AAGG	AAGG	AAAG	AAAG	AAGG	AAAG	AAAG	AAGG	AAGG	AGGG	AGGG	AAGG	AAGG	AAAG	AAGG	AAAG	AGGG	AAGG	AAAG	AAAG	AGGG	AAAA	AAGG	AAAA	AAAG	AAAG	AAAG	AAAA	AAAG	AAGG	AGGG	AAAG
PotVar0010905	T	C	CCCC	CCCC	CCCC	CCCC	CCCC	CCCC	TCCC	CCCC	CCCC	CCCC	CCCC	CCCC	TCCC	CCCC	CCCC	CCCC	CCCC	CCCC	TCCC	CCCC	CCCC	CCCC	CCCC	CCCC	CCCC	CCCC	CCCC	CCCC	CCCC	CCCC	TCCC	CCCC	CCCC	CCCC	CCCC	CCCC	CCCC	CCCC	CCCC	CCCC	CCCC	CCCC	CCCC	CCCC	CCCC	CCCC	CCCC
PotVar0010926	A	G	AAAA	AAGG	AAAA	AAAG	AAAG	AAGG	AAAA	AAAG	AAAG	AAGG	AAGG	AAAG	AAAA	AAGG	AAAA	AAAG	AAGG	AAAG	AAAA	AAAG	AAAA	AAGG	AAAG	AAAA	AAAG	AAAG	AAAA	AAAG	AAAG	AAAA	AAAG	AAAA	AAAG	AAAG	AAGG	AAAA	AAGG	AAAA	AAAG	AAAG	AAAG	AAAA	AAAG	AAAG	AAAG	AAAA	AAAG
PotVar0010928	T	C	TTTT	TTTT	TTTT	TTTT	TTTT	TTTT	TTTT	TTTT	TTTC	TTTT	TTTT	TTTT	TTTT	TTTT	TTTT	TTTT	TTTT	TTTT	TTTT	TTTT	TTTT	TTTT	TTTT	TTTT	TTTT	TTTT	TTTT	TTTT	TTTT	TTTT	TTTT	TTTT	TTTT	TTTT	TTTT	TTTT	TTTT	TTTT	TTTT	TTTT	TTTT	TTTT	TTTT	TTTT	TTTT	TTTT	TTTT
PotVar0010934	A	G	GGGG	GGGG	GGGG	GGGG	GGGG	GGGG	GGGG	GGGG	AGGG	AGGG	AAGG	GGGG	GGGG	GGGG	GGGG	AGGG	AAGG	GGGG	GGGG	GGGG	GGGG	AGGG	AGGG	GGGG	AGGG	AGGG	GGGG	AGGG	AGGG	GGGG	GGGG	GGGG	AGGG	AGGG	AGGG	GGGG	GGGG	GGGG	AGGG	GGGG	GGGG	GGGG	GGGG	GGGG	GGGG	GGGG	AGGG
PotVar0010937	A	C	AAAA	AAAA	AAAA	AAAA	AAAA	AAAA	AAAA	AAAA	AAAA	AAAA	AAAA	AAAA	AAAA	AAAA	AAAA	AAAA	AAAA	AAAA	AAAA	AAAA	AAAA	AAAA	AAAA	AAAA	AAAA	AAAA	AAAA	AAAA	AAAA	AAAA	AAAA	AAAA	AAAA	AAAA	AAAA	AAAA	AAAA	AAAA	AAAA	AAAA	AAAA	AAAA	AAAA	AAAA	AAAA	AAAA	AAAC
PotVar0010941	A	G	AAAA	AAAA	AAAG	AAAA	AAAA	AAAG	AAAA	AAAG	AAAA	AAAG	AAAA	AAAA	AAAA	AAAA	AAAA	AAAG	AAAA	AAAA	AAAA	AAAA	AAAG	AAAA	AAAA	AAAA	AAAG	AAAG	AAAG	AAAA	AAAA	AAAA	AAAA	AAAG	AAAA	AAAA	AAAA	AAAA	AAAA	AAAA	AAAA	AAAA	AAAA	AAAA	AAAA	AAAA	AAAA	AAAA	AAAA
PotVar0010943	A	C	CCCC	AAAC	AACC	AACC	AACC	AACC	ACCC	AACC	AACC	ACCC	ACCC	AACC	ACCC	AAAC	ACCC	ACCC	CCCC	AACC	CCCC	ACCC	AACC	ACCC	ACCC	AACC	CCCC	CCCC	ACCC	ACCC	AACC	AACC	ACCC	CCCC	ACCC	CCCC	AACC	ACCC	AAAC	CCCC	AACC	AAAC	AACC	AACC	AAAC	AAAC	ACCC	ACCC	ACCC
PotVar0010946	A	G	----	----	----	----	----	----	----	----	----	----	----	----	----	----	----	----	----	----	----	----	----	----	----	----	----	----	----	----	----	----	----	----	----	----	----	----	----	----	----	----	----	----	----	----	----	----	----
PotVar0010948	A	G	AAGG	GGGG	AGGG	AGGG	AGGG	AGGG	GGGG	GGGG	GGGG	AGGG	GGGG	AGGG	GGGG	GGGG	GGGG	GGGG	GGGG	AGGG	AGGG	AAAG	AGGG	----	AGGG	AGGG	GGGG	GGGG	AGGG	GGGG	GGGG	GGGG	AGGG	AGGG	AGGG	AAGG	GGGG	GGGG	AGGG	AAGG	AGGG	GGGG	AGGG	AGGG	AGGG	GGGG	AAAG	AGGG	AGGG
PotVar0010982	T	C	CCCC	CCCC	CCCC	CCCC	CCCC	CCCC	CCCC	CCCC	TCCC	CCCC	CCCC	CCCC	CCCC	CCCC	CCCC	CCCC	CCCC	CCCC	CCCC	CCCC	CCCC	CCCC	CCCC	CCCC	CCCC	CCCC	CCCC	CCCC	CCCC	CCCC	CCCC	CCCC	CCCC	CCCC	CCCC	CCCC	CCCC	CCCC	CCCC	CCCC	CCCC	CCCC	CCCC	CCCC	CCCC	CCCC	CCCC
PotVar0010983	T	C	TTCC	TCCC	TCCC	CCCC	CCCC	TCCC	CCCC	CCCC	----	TTTC	CCCC	CCCC	CCCC	TCCC	TTCC	CCCC	TCCC	TCCC	CCCC	TCCC	CCCC	CCCC	CCCC	TTCC	TCCC	TCCC	TTCC	----	TTCC	TCCC	CCCC	TTCC	CCCC	TCCC	TCCC	TTCC	CCCC	TCCC	TCCC	TCCC	TCCC	TCCC	CCCC	CCCC	CCCC	CCCC	TTCC
PotVar0010985	T	C	CCCC	TCCC	TCCC	TCCC	TTCC	TCCC	CCCC	TCCC	CCCC	CCCC	CCCC	TTCC	TCCC	TCCC	CCCC	CCCC	TTCC	TCCC	TCCC	CCCC	TCCC	----	CCCC	TCCC	TTCC	TTCC	CCCC	TCCC	CCCC	TCCC	TTCC	----	CCCC	TCCC	CCCC	TTCC	CCCC	CCCC	TCCC	CCCC	TTCC	TCCC	TCCC	TTCC	TTCC	TCCC	CCCC
PotVar0011020	A	G	----	----	----	----	----	----	----	----	----	----	----	----	----	----	----	----	----	----	----	----	----	----	----	----	----	----	----	----	----	----	----	----	----	----	----	----	----	----	----	----	----	----	----	----	----	----	----
PotVar0011031	T	C	CCCC	CCCC	CCCC	CCCC	CCCC	TCCC	CCCC	CCCC	CCCC	CCCC	CCCC	CCCC	CCCC	CCCC	CCCC	CCCC	CCCC	CCCC	CCCC	CCCC	CCCC	CCCC	CCCC	CCCC	TCCC	TCCC	CCCC	CCCC	CCCC	CCCC	TCCC	CCCC	CCCC	CCCC	CCCC	CCCC	CCCC	CCCC	CCCC	CCCC	CCCC	CCCC	CCCC	CCCC	CCCC	CCCC	CCCC
PotVar0011035	A	G	GGGG	GGGG	AAGG	AGGG	GGGG	AGGG	AGGG	GGGG	GGGG	AGGG	AGGG	AGGG	AGGG	GGGG	GGGG	AGGG	AGGG	AGGG	AAGG	AGGG	GGGG	AGGG	AGGG	GGGG	GGGG	GGGG	GGGG	AGGG	AGGG	AGGG	AGGG	GGGG	AGGG	AGGG	AAGG	GGGG	AAGG	AAGG	AAGG	AAGG	GGGG	GGGG	AGGG	AGGG	AGGG	AAGG	AGGG
PotVar0011047	A	G	AAGG	AAGG	GGGG	GGGG	AGGG	GGGG	AAGG	AGGG	AGGG	GGGG	AAAG	GGGG	AAGG	AAGG	AGGG	AAGG	GGGG	GGGG	AGGG	AAGG	AAAG	AAGG	AAAG	AGGG	GGGG	GGGG	----	AGGG	AGGG	AGGG	GGGG	GGGG	AAAG	GGGG	AGGG	GGGG	AAGG	AGGG	GGGG	GGGG	GGGG	AAGG	AAGG	AGGG	AGGG	GGGG	AGGG
PotVar0011048	A	G	----	----	----	----	----	----	----	----	----	----	----	----	----	----	----	----	----	----	----	----	----	----	----	----	----	----	----	----	----	----	----	----	----	----	----	----	----	----	----	----	----	----	----	----	----	----	----
PotVar0011066	T	C	CCCC	TCCC	TTTC	TTCC	TTCC	TTCC	TCCC	TCCC	CCCC	TCCC	TCCC	TTTC	TTCC	TCCC	CCCC	TCCC	TTTC	TTCC	TTTC	TCCC	TCCC	TTCC	TCCC	TCCC	TTCC	TTCC	CCCC	TTCC	TCCC	TTCC	TTTC	TTCC	TCCC	TTCC	TTCC	TTCC	TTCC	TTCC	TTTC	TTCC	TTCC	TCCC	TTCC	TTTC	TTTC	TTTC	TCCC
PotVar0011067	T	C	TTTT	TTTT	TTTT	TTCC	TTTT	TTTT	TTTT	TTTT	TTTT	TTTT	TTTT	TTTC	TTTT	TTTT	TTTC	TTTT	TTTT	TTTT	TTTT	TTTT	TTTT	TTTT	TTTT	TTTT	TTTT	TTTT	TTTT	TTTT	TTTT	TTTT	TTTT	TTTT	TTTT	TTTT	TTTT	TTTT	TTTT	TTTT	TTTT	TTTC	TTTT	TTTT	TTTT	TTTT	TTTT	TTTT	TTTT
PotVar0011072	T	C	----	----	----	----	----	----	----	----	----	----	----	----	----	----	----	----	----	----	----	----	----	----	----	----	----	----	----	----	----	----	----	----	----	----	----	----	----	----	----	----	----	----	----	----	----	----	----
PotVar0011077	A	G	GGGG	GGGG	GGGG	GGGG	GGGG	GGGG	GGGG	GGGG	AGGG	GGGG	GGGG	GGGG	GGGG	GGGG	GGGG	GGGG	GGGG	GGGG	GGGG	GGGG	GGGG	GGGG	GGGG	GGGG	GGGG	GGGG	GGGG	GGGG	GGGG	GGGG	GGGG	GGGG	GGGG	GGGG	GGGG	GGGG	GGGG	GGGG	GGGG	GGGG	GGGG	GGGG	GGGG	GGGG	GGGG	GGGG	GGGG
PotVar0011079	A	G	AAAA	AAAG	AAAG	AAAG	AAGG	AAAG	AAAA	AAAG	AAAA	AAAA	AAAA	AAAG	AAAG	AAAG	AAAA	AAAA	AAGG	AAAG	AAAG	AAAA	AAAG	----	AAAA	AAAG	AAGG	AAGG	AAAA	AAAG	AAAA	AAAG	AAGG	AAGG	AAAA	AAAG	AAAA	AAGG	AAAA	AAAA	AAAG	AAAA	AAGG	AAAG	AAAG	AAGG	AAGG	AAAA	AAAA
PotVar0011085	A	G	----	----	----	----	----	----	----	----	----	----	----	----	----	----	----	----	----	----	----	----	----	----	----	----	----	----	----	----	----	----	----	----	----	----	----	----	----	----	----	----	----	----	----	----	----	----	----
PotVar0011086	A	G	----	----	----	----	----	----	----	----	----	----	----	----	----	----	----	----	----	----	----	----	----	----	----	----	----	----	----	----	----	----	----	----	----	----	----	----	----	----	----	----	----	----	----	----	----	----	----
PotVar0011098	A	G	----	----	----	----	----	----	----	----	----	----	----	----	----	----	----	----	----	----	----	----	----	----	----	----	----	----	----	----	----	----	----	----	----	----	----	----	----	----	----	----	----	----	----	----	----	----	----
PotVar0011101	T	C	CCCC	CCCC	TTCC	TCCC	TCCC	TCCC	TTCC	TTCC	TCCC	TCCC	TCCC	TTCC	TCCC	TCCC	CCCC	TTCC	TCCC	TTCC	TTCC	TCCC	CCCC	----	TTTC	CCCC	CCCC	CCCC	CCCC	TCCC	TCCC	TCCC	TCCC	CCCC	TTTC	TTCC	TTCC	CCCC	TTCC	TTCC	TTCC	TTCC	TCCC	CCCC	TCCC	TCCC	TCCC	TTTT	TTCC
PotVar0011103	T	G	GGGG	GGGG	GGGG	GGGG	GGGG	GGGG	GGGG	GGGG	TGGG	GGGG	GGGG	GGGG	GGGG	GGGG	GGGG	GGGG	GGGG	GGGG	GGGG	GGGG	GGGG	GGGG	GGGG	GGGG	GGGG	GGGG	GGGG	GGGG	GGGG	GGGG	GGGG	GGGG	GGGG	GGGG	GGGG	GGGG	GGGG	GGGG	GGGG	GGGG	GGGG	GGGG	GGGG	GGGG	GGGG	GGGG	GGGG
PotVar0011104	A	C	CCCC	CCCC	CCCC	CCCC	CCCC	CCCC	CCCC	CCCC	CCCC	CCCC	CCCC	ACCC	ACCC	ACCC	CCCC	CCCC	CCCC	CCCC	ACCC	CCCC	CCCC	ACCC	AACC	CCCC	CCCC	CCCC	CCCC	CCCC	CCCC	CCCC	CCCC	CCCC	AACC	CCCC	CCCC	CCCC	CCCC	CCCC	CCCC	CCCC	CCCC	CCCC	CCCC	CCCC	CCCC	ACCC	ACCC
PotVar0011110	T	C	----	----	----	----	----	----	----	----	----	----	----	----	----	----	----	----	----	----	----	----	----	----	----	----	----	----	----	----	----	----	----	----	----	----	----	----	----	----	----	----	----	----	----	----	----	----	----
PotVar0011128	A	G	AAAA	AAAA	AAAA	AAAA	AAAA	AAAA	AAAG	AAGG	AAAG	AAAA	AAAA	AAAA	AAAA	AAAA	AAAA	AAAG	AAAA	AAAG	AAAA	AAAA	AAAA	AAAA	AAAA	AAAA	AAAA	AAAA	AAAA	AAAA	AAAA	AAAA	AAAA	AAAA	AAAA	AAAA	AAAA	AAAA	AAAA	AAAA	AAAA	AAAA	AAAG	AAAA	AAAA	AAAA	AAAA	AAAG	AAAA
PotVar0011130	T	C	CCCC	CCCC	CCCC	CCCC	CCCC	CCCC	CCCC	CCCC	TCCC	CCCC	CCCC	CCCC	CCCC	CCCC	CCCC	CCCC	CCCC	CCCC	CCCC	CCCC	CCCC	CCCC	CCCC	CCCC	CCCC	CCCC	CCCC	CCCC	CCCC	CCCC	CCCC	CCCC	CCCC	CCCC	CCCC	CCCC	CCCC	CCCC	CCCC	CCCC	CCCC	CCCC	CCCC	CCCC	CCCC	CCCC	CCCC
PotVar0011148	A	G	----	----	----	----	----	----	----	----	----	----	----	----	----	----	----	----	----	----	----	----	----	----	----	----	----	----	----	----	----	----	----	----	----	----	----	----	----	----	----	----	----	----	----	----	----	----	----
PotVar0011160	T	C	CCCC	CCCC	CCCC	CCCC	CCCC	CCCC	CCCC	CCCC	CCCC	CCCC	CCCC	CCCC	CCCC	CCCC	CCCC	CCCC	CCCC	CCCC	CCCC	CCCC	CCCC	CCCC	CCCC	CCCC	CCCC	CCCC	CCCC	CCCC	CCCC	CCCC	CCCC	CCCC	CCCC	CCCC	CCCC	CCCC	CCCC	CCCC	CCCC	CCCC	CCCC	CCCC	CCCC	CCCC	CCCC	CCCC	CCCC
PotVar0011162	A	G	----	----	----	----	----	----	----	----	----	----	----	----	----	----	----	----	----	----	----	----	----	----	----	----	----	----	----	----	----	----	----	----	----	----	----	----	----	----	----	----	----	----	----	----	----	----	----
PotVar0011163	A	C	CCCC	CCCC	CCCC	CCCC	CCCC	CCCC	CCCC	CCCC	ACCC	ACCC	CCCC	CCCC	CCCC	ACCC	AACC	CCCC	ACCC	ACCC	CCCC	ACCC	CCCC	CCCC	CCCC	AACC	CCCC	CCCC	ACCC	ACCC	CCCC	CCCC	CCCC	ACCC	CCCC	CCCC	CCCC	ACCC	CCCC	CCCC	CCCC	CCCC	ACCC	ACCC	CCCC	CCCC	CCCC	CCCC	CCCC
PotVar0011164	T	C	----	----	----	----	----	----	----	----	----	----	----	----	----	----	----	----	----	----	----	----	----	----	----	----	----	----	----	----	----	----	----	----	----	----	----	----	----	----	----	----	----	----	----	----	----	----	----
PotVar0011173	A	C	ACCC	AAAC	AAAC	AACC	AAAA	AAAC	AAAA	AAAA	AAAC	AACC	AAAA	AAAC	AAAA	AAAA	AAAC	AAAA	AAAA	AAAA	AAAA	AAAA	AAAA	AAAA	AAAA	AAAA	AAAC	AAAC	AAAC	AAAC	AACC	AAAC	AAAA	AAAC	AAAA	AAAC	AAAC	AAAC	AAAA	AAAC	AAAC	AACC	AAAA	AAAA	AAAA	AAAA	AAAA	AAAA	AACC
PotVar0011182	T	C	TTTT	TTTC	TTCC	TTCC	TCCC	TTTC	TTCC	TTTT	TTTT	TTTC	CCCC	TTCC	TTTT	TTTT	TTTT	----	TTTC	TTCC	TTTC	TTCC	TTCC	TTCC	TTCC	TTTT	TTTT	TTTT	TTTC	TTTC	TTTC	TTCC	TTTC	TTTT	----	TTCC	TTTC	TTTT	TCCC	TTCC	TTCC	TTCC	TTTT	TTTT	TCCC	TTCC	TTTC	TCCC	TTTC
PotVar0011184	A	G	AAAG	AGGG	AAAG	AAAG	GGGG	AAGG	AAGG	AAGG	AAGG	AAAG	AGGG	AAGG	GGGG	GGGG	GGGG	AAGG	AGGG	AAGG	AGGG	AGGG	GGGG	AGGG	AGGG	GGGG	AGGG	AGGG	AGGG	AAGG	AAAG	AAGG	AGGG	AGGG	AGGG	AAGG	AAAG	AGGG	AAGG	AAAG	AAAG	AAAG	AGGG	GGGG	AGGG	AGGG	AGGG	AAGG	AAAG
PotVar0011188	A	G	----	----	----	----	----	----	----	----	----	----	----	----	----	----	----	----	----	----	----	----	----	----	----	----	----	----	----	----	----	----	----	----	----	----	----	----	----	----	----	----	----	----	----	----	----	----	----
PotVar0011189	A	G	GGGG	AGGG	AAGG	AAGG	AAAG	AGGG	AAAG	AAGG	AGGG	AGGG	AAAA	AAAG	AGGG	AGGG	GGGG	AAAG	AGGG	AAAG	AAGG	AAGG	AAGG	AAAG	AAAA	GGGG	GGGG	GGGG	AGGG	AGGG	AGGG	AAGG	AGGG	GGGG	AAAA	AAGG	AAGG	GGGG	AAAG	AAGG	AAGG	AAGG	AGGG	GGGG	AAAG	AAGG	AAGG	AAAA	AAGG
PotVar0011225	A	G	GGGG	AAGG	AGGG	GGGG	AGGG	AGGG	AGGG	GGGG	GGGG	GGGG	AGGG	GGGG	AGGG	GGGG	AAAA	AGGG	AGGG	AGGG	GGGG	GGGG	AGGG	AGGG	AGGG	AGGG	AAGG	AAGG	GGGG	GGGG	GGGG	GGGG	AGGG	AGGG	AGGG	GGGG	AGGG	AAGG	GGGG	GGGG	GGGG	AGGG	GGGG	GGGG	AGGG	GGGG	GGGG	AGGG	AAGG
PotVar0011226	A	G	AAAA	AAAG	AAAA	AAAA	AAAA	AAAG	AAAA	AAAA	AAAG	AAAA	AAAA	AAAG	AAAG	AAAG	AAAA	AAAA	AAAG	AAAA	AAAG	AAAA	AAAG	AAAA	AAAA	AAAA	AAAA	AAAA	AAAA	AAAG	AAAG	AAAG	AAAA	AAAA	AAAA	AGGG	AAAA	AAAA	AAAA	AAAA	AAAG	AAAG	AAAA	AAAG	AAAA	AAAA	AAAG	AAAA	AAAA
PotVar0011229	A	G	GGGG	GGGG	GGGG	GGGG	GGGG	AGGG	GGGG	GGGG	GGGG	AAGG	GGGG	GGGG	GGGG	GGGG	GGGG	GGGG	GGGG	GGGG	GGGG	GGGG	GGGG	GGGG	GGGG	GGGG	GGGG	GGGG	GGGG	GGGG	GGGG	GGGG	GGGG	GGGG	GGGG	GGGG	GGGG	GGGG	GGGG	GGGG	GGGG	GGGG	GGGG	GGGG	GGGG	GGGG	GGGG	GGGG	GGGG
PotVar0011236	T	C	TCCC	CCCC	TCCC	TTTC	TTCC	CCCC	TCCC	TCCC	TTCC	TCCC	TCCC	CCCC	CCCC	TCCC	CCCC	TCCC	TCCC	TCCC	CCCC	TTTC	CCCC	----	TTCC	TCCC	TCCC	TCCC	CCCC	CCCC	TTCC	TTCC	TTCC	TCCC	TTCC	TCCC	TCCC	TCCC	TTTC	CCCC	TCCC	TTCC	CCCC	CCCC	TCCC	TTTC	CCCC	TTCC	TCCC
PotVar0011245	T	C	TTTT	TTTT	TTTT	TTTT	TTTT	TTTT	TTTT	TTTT	TTTT	TTTT	TTTT	TTTT	TTTT	TTTT	TTTT	TTTT	TTTT	TTTT	TTTT	TTTT	TTTT	TTTT	TTTT	TTTT	TTTT	TTTT	TTTT	TTTT	TTTT	TTTT	TTTT	TTTT	TTTT	TTTT	TTTT	TTTT	TTTT	TTTT	TTTT	TTTT	TTTT	TTTT	TTTT	TTTT	TTTT	TTTT	TTTT
PotVar0011258	A	G	AAAG	AAAA	AAAG	AAAG	AAAA	AAAG	AAAG	AAAA	AAAA	AAAA	AAAA	AAGG	AAAA	AAAA	AAAA	AAAA	AAAG	AAAG	AAAA	AAAA	AAAA	AAAA	AAAA	AAAA	AAAA	AAAA	AAAA	----	AAAA	AAAA	AAAA	AAAA	AAAA	AAAA	AAAG	AAAA	AAAA	AAAA	AAAA	AAAA	AAAA	AAAA	AAAG	AAAG	AAGG	AAAA	AAAG
PotVar0011274	T	C	----	----	----	----	----	----	----	----	----	----	----	----	----	----	----	----	----	----	----	----	----	----	----	----	----	----	----	----	----	----	----	----	----	----	----	----	----	----	----	----	----	----	----	----	----	----	----
PotVar0011275	T	C	CCCC	CCCC	CCCC	CCCC	CCCC	CCCC	CCCC	CCCC	CCCC	CCCC	CCCC	CCCC	CCCC	CCCC	CCCC	CCCC	CCCC	CCCC	CCCC	CCCC	CCCC	CCCC	CCCC	CCCC	CCCC	CCCC	CCCC	CCCC	CCCC	CCCC	CCCC	CCCC	CCCC	CCCC	CCCC	CCCC	CCCC	CCCC	CCCC	CCCC	CCCC	CCCC	CCCC	CCCC	CCCC	CCCC	CCCC
PotVar0011288	A	G	----	----	----	----	----	----	----	----	----	----	----	----	----	----	----	----	----	----	----	----	----	----	----	----	----	----	----	----	----	----	----	----	----	----	----	----	----	----	----	----	----	----	----	----	----	----	----
PotVar0011289	A	G	AAAA	AAAA	AAAA	AAAA	AAAA	AAAG	AAAA	AAAA	AAAG	AAAA	AAAA	AAAG	AAAG	AAAG	AAAA	AAAA	AAAG	AAAA	AAAG	AAAA	AAAG	AAAA	AAAA	AAAA	AAAA	AAAA	AAAA	AAAA	AAAG	AAAG	AAAA	AAAA	AAAA	AGGG	AAAA	AAAA	AAAA	AAAA	AAAG	AAAG	AAAA	AAAG	AAAA	AAAA	AAAG	AAAA	AAAA
PotVar0011300	T	C	TTCC	CCCC	TTCC	TTTC	TTTC	CCCC	TCCC	TTTC	TTTC	TTCC	TCCC	TTCC	CCCC	TTCC	CCCC	TTCC	TCCC	TCCC	CCCC	TTTT	TCCC	TTTC	TTCC	TTCC	TCCC	TCCC	TTCC	TTCC	TTTC	TTCC	TTTC	TTCC	TTCC	TCCC	TTCC	TCCC	TTTC	TTTC	TCCC	TTCC	TCCC	TCCC	TCCC	TTTC	TTCC	TTCC	TCCC
PotVar0011302	A	G	AAAA	AAAG	AAAA	AAAA	AAAG	AAAA	AAAG	AAAA	AAAA	AAAA	AAAG	AAAA	AAAG	AAAA	AAAG	AAAG	AAAA	AAAA	AAAA	AAAA	AAAA	AAAA	AAAA	AAAG	AAAG	AAAG	AAAA	AAAA	AAAA	AAAA	AAAG	AAAG	AAAA	AAAA	AAAA	AAAG	AAAA	AAAA	AAAA	AAAG	AAAA	AAAA	AAAG	AAAA	AAAA	AAAG	AAAG
PotVar0011330	T	C	----	----	----	----	----	----	----	----	----	----	----	----	----	----	----	----	----	----	----	----	----	----	----	----	----	----	----	----	----	----	----	----	----	----	----	----	----	----	----	----	----	----	----	----	----	----	----
PotVar0011354	T	G	TTTT	TTTT	TTTT	TTTT	TTTT	TTTT	TTTT	TTTT	TTTT	TTTT	TTTT	TTTT	TTTT	TTTT	TTTT	TTTT	TTTT	TTTT	TTTT	TTTT	TTTT	TTTT	TTTT	TTTT	TTTT	TTTT	TTTT	TTTT	TTTT	TTTT	TTTT	TTTT	TTTT	TTTT	TTTT	TTTT	TTTT	TTTT	TTTT	TTTT	TTTT	TTTT	TTTT	TTTT	TTTT	TTTT	TTTT
PotVar0011360	A	G	GGGG	GGGG	GGGG	AGGG	GGGG	GGGG	AGGG	AGGG	GGGG	GGGG	AGGG	AGGG	AAGG	GGGG	GGGG	GGGG	GGGG	AGGG	AAGG	GGGG	GGGG	AGGG	AGGG	GGGG	AAGG	AAGG	GGGG	GGGG	GGGG	AGGG	GGGG	GGGG	AGGG	GGGG	AGGG	GGGG	GGGG	AGGG	AGGG	GGGG	AAGG	AGGG	AAGG	AGGG	GGGG	AGGG	GGGG
PotVar0011361	A	C	ACCC	AAAC	ACCC	AAAC	AACC	AAAC	AAAA	AACC	CCCC	AACC	AAAC	AACC	AAAA	ACCC	AAAA	ACCC	AAAA	AAAC	AAAC	AACC	AACC	----	AAAC	ACCC	AAAC	AAAC	CCCC	----	AAAC	AAAC	ACCC	ACCC	AAAC	AACC	AAAC	AAAC	AAAA	ACCC	AAAA	AAAC	AACC	AACC	AAAC	AAAA	AACC	AACC	AAAC
PotVar0011392	A	G	AAGG	AAAG	AAGG	AAAG	AAAG	AAAG	AAAA	AAAA	AAGG	AAAG	AAAA	AAAA	AAAA	AAGG	AAAA	AAGG	AAAA	AAAG	AAAG	AAAG	AAAG	AAAA	AAAA	AAGG	AAAG	AAAG	AAGG	AAAG	AAAG	AAAA	AAGG	AAGG	AAAA	AAGG	AAAA	AAAG	AAAA	AAAA	AAAA	AAAG	AAAG	AAAG	AAAG	AAAA	AAAA	AAAG	AAAG
PotVar0011393	T	C	----	----	----	----	----	----	----	----	----	----	----	----	----	----	----	----	----	----	----	----	----	----	----	----	----	----	----	----	----	----	----	----	----	----	----	----	----	----	----	----	----	----	----	----	----	----	----
PotVar0011397	A	G	GGGG	GGGG	GGGG	GGGG	GGGG	GGGG	GGGG	GGGG	GGGG	GGGG	GGGG	GGGG	GGGG	GGGG	GGGG	GGGG	GGGG	GGGG	GGGG	GGGG	GGGG	GGGG	GGGG	GGGG	GGGG	GGGG	GGGG	GGGG	GGGG	GGGG	GGGG	GGGG	GGGG	GGGG	GGGG	GGGG	GGGG	GGGG	GGGG	GGGG	GGGG	GGGG	GGGG	GGGG	GGGG	GGGG	GGGG
PotVar0011398	A	G	AAAA	AAAA	AAAA	AAAA	AAAA	AAAA	AAAA	AAAA	AAAA	AAAA	AAAA	AAAA	AAAA	AAAA	AAAA	AAAA	AAAA	AAAA	AAAA	AAAA	AAAA	AAAA	AAAA	AAAA	AAAA	AAAA	AAAA	AAAA	AAAA	AAAA	AAAA	AAAA	AAAA	AAAA	AAAA	AAAA	AAAA	AAAA	AAAA	AAAA	AAAA	AAAA	AAAA	AAAA	AAAA	AAAA	AAAA
PotVar0011481	A	G	AAAG	AAAG	AAAG	AAAG	AAGG	AAGG	AGGG	AAAG	AAAA	AAAA	AAGG	AAAA	AAAG	AAAG	AAAA	AAAG	GGGG	AAGG	AAAG	AAGG	AAAG	AAAG	AAAG	AAAA	AAAA	AAAA	AAAA	AAAG	----	AAGG	AAAG	AAAG	AAAG	----	AAAG	AAGG	AGGG	AAAA	AGGG	AAGG	AAAA	AAAG	AAAA	AGGG	AAGG	AAAA	AAGG
PotVar0011496	A	G	----	----	----	----	----	----	----	----	----	----	----	----	----	----	----	----	----	----	----	----	----	----	----	----	----	----	----	----	----	----	----	----	----	----	----	----	----	----	----	----	----	----	----	----	----	----	----
PotVar0011497	A	C	AAAA	AAAA	AAAA	AAAA	AAAA	AAAA	AAAA	AAAA	AAAA	AAAA	AAAA	AAAA	AAAA	AAAA	AAAA	AAAA	AAAA	AAAA	AAAA	AAAA	AAAA	AAAA	AAAA	AAAA	AAAA	AAAA	AAAA	AAAC	AAAA	AAAA	AAAA	AAAA	AAAA	AAAA	AAAC	AAAA	AAAA	AAAA	AAAA	AAAA	AAAA	AAAA	AAAA	AAAA	AAAA	AAAA	AAAA
PotVar0011522	A	G	GGGG	AGGG	GGGG	AGGG	GGGG	GGGG	GGGG	GGGG	GGGG	GGGG	GGGG	AGGG	AGGG	GGGG	AAAG	GGGG	GGGG	GGGG	GGGG	GGGG	AGGG	AGGG	AGGG	AGGG	AGGG	AGGG	GGGG	GGGG	GGGG	GGGG	GGGG	GGGG	AGGG	GGGG	GGGG	AGGG	GGGG	GGGG	GGGG	AGGG	GGGG	GGGG	GGGG	GGGG	GGGG	AGGG	GGGG
PotVar0011534	A	C	CCCC	ACCC	CCCC	CCCC	CCCC	CCCC	CCCC	CCCC	CCCC	CCCC	CCCC	CCCC	CCCC	CCCC	CCCC	CCCC	CCCC	CCCC	CCCC	CCCC	CCCC	CCCC	CCCC	CCCC	CCCC	CCCC	CCCC	CCCC	CCCC	CCCC	CCCC	CCCC	CCCC	CCCC	CCCC	CCCC	CCCC	CCCC	CCCC	CCCC	CCCC	CCCC	CCCC	CCCC	CCCC	CCCC	CCCC
PotVar0011543	A	G	GGGG	GGGG	GGGG	GGGG	GGGG	GGGG	GGGG	GGGG	GGGG	GGGG	GGGG	GGGG	GGGG	GGGG	GGGG	GGGG	GGGG	GGGG	GGGG	GGGG	GGGG	GGGG	GGGG	GGGG	GGGG	GGGG	GGGG	----	GGGG	GGGG	GGGG	GGGG	GGGG	GGGG	GGGG	GGGG	GGGG	GGGG	GGGG	GGGG	GGGG	GGGG	GGGG	GGGG	GGGG	GGGG	GGGG
PotVar0011561	A	G	GGGG	GGGG	GGGG	GGGG	GGGG	GGGG	GGGG	GGGG	GGGG	GGGG	GGGG	GGGG	GGGG	GGGG	GGGG	GGGG	GGGG	GGGG	GGGG	GGGG	GGGG	GGGG	GGGG	GGGG	GGGG	GGGG	GGGG	GGGG	GGGG	GGGG	GGGG	GGGG	GGGG	GGGG	GGGG	GGGG	GGGG	GGGG	GGGG	GGGG	GGGG	GGGG	GGGG	GGGG	GGGG	GGGG	GGGG
PotVar0011562	T	C	TCCC	TTCC	TCCC	TTTC	TTCC	TTCC	TTTT	TTCC	CCCC	CCCC	TTTC	TTCC	TTTT	TCCC	TTTT	TCCC	TTTT	TTTC	TTTC	TTCC	TTCC	TTTC	TTTC	TCCC	TTTC	TTTC	CCCC	TCCC	TTTC	TTTC	TCCC	TCCC	TTTC	TTCC	TTCC	TTTC	TTTT	TCCC	TTTT	TTTC	TTCC	TTCC	TTTC	TTTT	TTCC	TTCC	TTTC
PotVar0011579	T	G	----	----	----	----	----	----	----	----	----	----	----	----	----	----	----	----	----	----	----	----	----	----	----	----	----	----	----	----	----	----	----	----	----	----	----	----	----	----	----	----	----	----	----	----	----	----	----
PotVar0011580	T	C	CCCC	TCCC	CCCC	CCCC	CCCC	TCCC	CCCC	CCCC	CCCC	TTCC	CCCC	CCCC	CCCC	CCCC	CCCC	CCCC	CCCC	CCCC	CCCC	CCCC	CCCC	CCCC	CCCC	CCCC	CCCC	CCCC	CCCC	CCCC	CCCC	CCCC	CCCC	CCCC	CCCC	CCCC	CCCC	CCCC	CCCC	CCCC	CCCC	CCCC	CCCC	CCCC	CCCC	CCCC	CCCC	CCCC	CCCC
PotVar0011582	A	G	GGGG	AGGG	GGGG	GGGG	GGGG	GGGG	GGGG	GGGG	GGGG	GGGG	GGGG	GGGG	GGGG	GGGG	GGGG	GGGG	GGGG	GGGG	GGGG	GGGG	GGGG	GGGG	GGGG	GGGG	GGGG	GGGG	GGGG	GGGG	GGGG	GGGG	GGGG	GGGG	GGGG	GGGG	GGGG	GGGG	GGGG	GGGG	GGGG	GGGG	GGGG	GGGG	GGGG	GGGG	GGGG	GGGG	GGGG
PotVar0011614	T	C	----	----	----	----	----	----	----	----	----	----	----	----	----	----	----	----	----	----	----	----	----	----	----	----	----	----	----	----	----	----	----	----	----	----	----	----	----	----	----	----	----	----	----	----	----	----	----
PotVar0011629	A	C	CCCC	CCCC	CCCC	CCCC	CCCC	CCCC	CCCC	CCCC	CCCC	CCCC	CCCC	CCCC	CCCC	CCCC	CCCC	CCCC	CCCC	CCCC	CCCC	CCCC	CCCC	CCCC	CCCC	CCCC	CCCC	CCCC	CCCC	CCCC	CCCC	CCCC	CCCC	CCCC	CCCC	CCCC	CCCC	CCCC	CCCC	CCCC	CCCC	CCCC	CCCC	CCCC	CCCC	CCCC	CCCC	CCCC	CCCC
PotVar0011657	T	C	----	----	----	----	----	----	----	----	----	----	----	----	----	----	----	----	----	----	----	----	----	----	----	----	----	----	----	----	----	----	----	----	----	----	----	----	----	----	----	----	----	----	----	----	----	----	----
PotVar0011673	A	G	GGGG	GGGG	GGGG	AGGG	GGGG	GGGG	AGGG	AGGG	GGGG	GGGG	AGGG	AGGG	AAGG	GGGG	GGGG	GGGG	GGGG	AGGG	AAGG	GGGG	GGGG	AGGG	AGGG	GGGG	AAGG	AAGG	GGGG	----	GGGG	AGGG	GGGG	GGGG	AGGG	GGGG	AGGG	GGGG	GGGG	AGGG	AGGG	GGGG	AAGG	AGGG	AAGG	AGGG	GGGG	AGGG	GGGG
PotVar0011674	T	C	TTTC	TTTT	TTTC	TTTT	TTTC	TTTT	TTTT	TTCC	TTCC	TTTC	TTTC	TTCC	TTTT	TTTC	TTTT	TTTC	TTTT	TTTT	TTTT	TTTC	TTTC	TTTC	TTTC	TTTC	TTTT	TTTT	TTCC	TTTC	TTTT	TTTC	TTTC	TTTC	TTTC	TTTT	TTTC	TTTT	TTTT	TCCC	TTTT	TTTT	TTTC	TTTC	TTTT	TTTT	TTCC	TTTC	TTTT
PotVar0011675	A	G	GGGG	GGGG	GGGG	AGGG	AGGG	GGGG	AGGG	AGGG	GGGG	GGGG	GGGG	GGGG	GGGG	GGGG	GGGG	GGGG	GGGG	GGGG	GGGG	AAGG	GGGG	AGGG	GGGG	GGGG	GGGG	GGGG	GGGG	GGGG	AGGG	AGGG	AGGG	GGGG	GGGG	AGGG	AGGG	GGGG	AGGG	GGGG	AGGG	AGGG	GGGG	GGGG	GGGG	AAAG	GGGG	GGGG	GGGG
PotVar0011708	A	C	AACC	ACCC	AACC	ACCC	AACC	ACCC	CCCC	CCCC	AACC	ACCC	CCCC	CCCC	CCCC	AACC	CCCC	AACC	CCCC	ACCC	ACCC	ACCC	ACCC	CCCC	CCCC	AACC	ACCC	ACCC	AACC	ACCC	ACCC	CCCC	AACC	AACC	CCCC	AACC	CCCC	ACCC	CCCC	CCCC	CCCC	CCCC	ACCC	ACCC	ACCC	CCCC	CCCC	ACCC	ACCC
PotVar0011713	A	G	AAAA	AAAG	AAAA	AAAG	AAAA	AAAA	AAAA	AAAA	AAAA	AAAA	AAAA	AAAG	AAAG	AAAA	AGGG	AAAA	AAAA	AAAA	AAAA	AAAA	AAAG	----	AAAG	AAAG	AAAG	AAAG	AAAA	AAAA	AAAA	AAAA	AAAA	AAAA	AAAG	AAAA	AAAA	AAAG	AAAA	AAAA	AAAA	AAAG	AAAA	AAAA	AAAA	AAAA	AAAA	AAAG	AAAA
PotVar0011714	A	C	----	----	----	----	----	----	----	----	----	----	----	----	----	----	----	----	----	----	----	----	----	----	----	----	----	----	----	----	----	----	----	----	----	----	----	----	----	----	----	----	----	----	----	----	----	----	----
PotVar0011738	T	C	CCCC	CCCC	CCCC	CCCC	CCCC	CCCC	CCCC	CCCC	CCCC	CCCC	CCCC	CCCC	CCCC	CCCC	CCCC	CCCC	CCCC	CCCC	CCCC	CCCC	CCCC	TCCC	TCCC	CCCC	CCCC	CCCC	CCCC	CCCC	CCCC	CCCC	CCCC	CCCC	TCCC	CCCC	TCCC	CCCC	CCCC	CCCC	CCCC	CCCC	CCCC	CCCC	CCCC	CCCC	CCCC	CCCC	CCCC
PotVar0011742	T	C	TTTT	TTTT	TTTT	TTTT	TTTT	TTTT	TTTT	TTTT	TTTT	TTTT	TTTT	TTTT	TTTT	TTTT	TTTT	TTTT	TTTT	TTTT	TTTT	TTTT	TTTT	TTTT	TTTT	TTTT	TTTT	TTTT	TTTT	TTTT	TTTT	TTTT	TTTT	TTTT	TTTT	TTTT	TTTT	TTTT	TTTT	TTTT	TTTT	TTTT	TTTT	TTTT	TTTT	TTTT	TTTT	TTTT	TTTT
PotVar0011743	T	G	GGGG	GGGG	GGGG	GGGG	GGGG	GGGG	TGGG	GGGG	GGGG	GGGG	TGGG	GGGG	GGGG	GGGG	GGGG	GGGG	GGGG	GGGG	GGGG	GGGG	GGGG	GGGG	TGGG	GGGG	GGGG	GGGG	GGGG	GGGG	GGGG	TGGG	GGGG	GGGG	TGGG	GGGG	GGGG	TGGG	GGGG	GGGG	GGGG	TGGG	GGGG	GGGG	GGGG	GGGG	TGGG	GGGG	TGGG
PotVar0011750	A	C	AAAA	AAAA	AAAC	AAAA	AAAA	AAAC	AACC	AAAA	AAAA	AAAA	AAAA	AAAA	AACC	AAAA	AAAC	AAAA	AAAC	AAAC	AAAC	AAAA	AAAA	----	AAAA	AAAA	AAAC	AAAC	AAAA	AAAA	AAAC	AAAA	AAAA	AAAA	AAAA	AAAA	AAAA	AAAA	AAAC	AAAA	AAAA	AAAA	AAAA	AAAC	AAAC	AAAA	AAAC	AAAA	AAAC
PotVar0011768	A	G	----	----	----	----	----	----	----	----	----	----	----	----	----	----	----	----	----	----	----	----	----	----	----	----	----	----	----	----	----	----	----	----	----	----	----	----	----	----	----	----	----	----	----	----	----	----	----
PotVar0011786	A	G	GGGG	GGGG	GGGG	GGGG	GGGG	AGGG	GGGG	GGGG	GGGG	AAGG	GGGG	GGGG	GGGG	GGGG	GGGG	GGGG	GGGG	GGGG	GGGG	GGGG	GGGG	GGGG	GGGG	GGGG	GGGG	GGGG	GGGG	GGGG	GGGG	GGGG	GGGG	GGGG	GGGG	GGGG	GGGG	GGGG	GGGG	GGGG	GGGG	GGGG	GGGG	GGGG	GGGG	GGGG	GGGG	GGGG	GGGG
PotVar0011794	T	C	CCCC	CCCC	TCCC	CCCC	CCCC	TCCC	TTCC	CCCC	CCCC	CCCC	CCCC	CCCC	TTCC	CCCC	TCCC	CCCC	TCCC	TCCC	TCCC	CCCC	CCCC	CCCC	CCCC	CCCC	TCCC	TCCC	CCCC	CCCC	CCCC	CCCC	CCCC	CCCC	CCCC	CCCC	CCCC	CCCC	TCCC	CCCC	CCCC	CCCC	CCCC	TCCC	TCCC	CCCC	TCCC	CCCC	TCCC
PotVar0011799	A	G	----	----	----	----	----	----	----	----	----	----	----	----	----	----	----	----	----	----	----	----	----	----	----	----	----	----	----	----	----	----	----	----	----	----	----	----	----	----	----	----	----	----	----	----	----	----	----
PotVar0011831	T	C	CCCC	CCCC	CCCC	CCCC	CCCC	CCCC	CCCC	CCCC	CCCC	CCCC	CCCC	CCCC	CCCC	CCCC	CCCC	CCCC	CCCC	CCCC	CCCC	CCCC	CCCC	CCCC	CCCC	CCCC	CCCC	CCCC	CCCC	TCCC	CCCC	CCCC	CCCC	CCCC	CCCC	CCCC	CCCC	CCCC	CCCC	CCCC	CCCC	CCCC	CCCC	CCCC	CCCC	CCCC	CCCC	CCCC	CCCC
PotVar0011839	A	G	AAAA	AAAA	AAAA	AAAG	AAAA	AAAA	AAAA	AAAG	AAAA	AAAA	AAAG	AAAG	AAAG	AAAA	AAAA	AAAA	AAAA	AAAG	AAAG	AAAA	AAAA	AAAA	AAAA	AAAA	AAAG	AAAG	AAAA	AAAA	AAAA	AAAG	AAAG	AAAA	AAAA	AAAA	AAAG	AAAA	AAAA	AAAG	AAAA	AAAA	AAGG	AAAA	AAGG	AAAG	AAAA	AAAG	AAAA
PotVar0011849	A	G	----	----	----	----	----	----	----	----	----	----	----	----	----	----	----	----	----	----	----	----	----	----	----	----	----	----	----	----	----	----	----	----	----	----	----	----	----	----	----	----	----	----	----	----	----	----	----
PotVar0011850	A	G	AAAA	AAAG	AAAG	AAGG	AAAG	AAAG	GGGG	AAGG	AAAA	AAAA	AAGG	AAAG	AGGG	AAAA	AAAG	AAAA	AAAG	AAGG	AAGG	AAAG	AAAA	AAGG	AAGG	AAAA	AAGG	AAGG	AAAA	AAAG	AAAG	AGGG	AAAG	AAAA	AAGG	AAAG	AGGG	AAAG	AAAG	AAAG	AAAG	AAGG	AAGG	AAAG	AGGG	GGGG	AAGG	AAAG	AAGG
PotVar0011855	T	C	----	----	----	----	----	----	----	----	----	----	----	----	----	----	----	----	----	----	----	----	----	----	----	----	----	----	----	----	----	----	----	----	----	----	----	----	----	----	----	----	----	----	----	----	----	----	----
PotVar0011879	T	C	CCCC	CCCC	CCCC	TCCC	CCCC	TTCC	CCCC	TCCC	CCCC	TTTC	TCCC	TCCC	TCCC	CCCC	CCCC	CCCC	CCCC	TCCC	TCCC	CCCC	CCCC	CCCC	CCCC	CCCC	TCCC	TCCC	CCCC	----	CCCC	TCCC	TCCC	CCCC	CCCC	CCCC	TCCC	CCCC	CCCC	TCCC	CCCC	CCCC	TTCC	CCCC	TTCC	TCCC	CCCC	TCCC	CCCC
PotVar0011885	A	G	----	----	----	----	----	----	----	----	----	----	----	----	----	----	----	----	----	----	----	----	----	----	----	----	----	----	----	----	----	----	----	----	----	----	----	----	----	----	----	----	----	----	----	----	----	----	----
PotVar0011891	A	G	GGGG	GGGG	GGGG	AAGG	AGGG	GGGG	AGGG	AAGG	GGGG	GGGG	AGGG	AGGG	AGGG	GGGG	GGGG	GGGG	GGGG	AGGG	AGGG	AGGG	GGGG	AGGG	AGGG	GGGG	AGGG	AGGG	GGGG	----	AGGG	AAGG	AGGG	GGGG	AGGG	AGGG	AAAG	GGGG	GGGG	AGGG	AGGG	AGGG	AAGG	GGGG	AAGG	AAAA	GGGG	AGGG	GGGG
PotVar0011903	T	G	GGGG	GGGG	GGGG	GGGG	GGGG	GGGG	GGGG	GGGG	GGGG	GGGG	GGGG	GGGG	GGGG	GGGG	GGGG	GGGG	GGGG	GGGG	GGGG	GGGG	GGGG	GGGG	GGGG	GGGG	GGGG	GGGG	GGGG	GGGG	GGGG	GGGG	GGGG	GGGG	GGGG	GGGG	GGGG	GGGG	GGGG	GGGG	GGGG	GGGG	GGGG	GGGG	GGGG	GGGG	GGGG	GGGG	GGGG
PotVar0011916	T	C	----	----	----	----	----	----	----	----	----	----	----	----	----	----	----	----	----	----	----	----	----	----	----	----	----	----	----	----	----	----	----	----	----	----	----	----	----	----	----	----	----	----	----	----	----	----	----
PotVar0011917	A	C	AAAA	AAAA	AAAC	AAAA	AAAA	AAAC	AACC	AAAA	AAAA	AAAA	AAAA	AAAA	AACC	AAAA	AAAC	AAAA	AAAC	AAAC	AAAC	AAAA	AAAA	AAAA	AAAA	AAAA	AAAC	AAAC	AAAA	AAAA	AAAA	AAAA	AAAA	AAAA	AAAA	AAAA	AAAA	AAAA	AAAC	AAAA	AAAA	AAAA	AAAA	AAAC	AAAC	AAAA	AAAC	AAAA	AAAC
PotVar0011927	A	C	----	----	----	----	----	----	----	----	----	----	----	----	----	----	----	----	----	----	----	----	----	----	----	----	----	----	----	----	----	----	----	----	----	----	----	----	----	----	----	----	----	----	----	----	----	----	----
PotVar0011929	A	G	----	----	----	----	----	----	----	----	----	----	----	----	----	----	----	----	----	----	----	----	----	----	----	----	----	----	----	----	----	----	----	----	----	----	----	----	----	----	----	----	----	----	----	----	----	----	----
PotVar0011949	T	C	----	----	----	----	----	----	----	----	----	----	----	----	----	----	----	----	----	----	----	----	----	----	----	----	----	----	----	----	----	----	----	----	----	----	----	----	----	----	----	----	----	----	----	----	----	----	----
PotVar0012007	A	G	----	----	----	----	----	----	----	----	----	----	----	----	----	----	----	----	----	----	----	----	----	----	----	----	----	----	----	----	----	----	----	----	----	----	----	----	----	----	----	----	----	----	----	----	----	----	----
PotVar0012013	T	G	----	----	----	----	----	----	----	----	----	----	----	----	----	----	----	----	----	----	----	----	----	----	----	----	----	----	----	----	----	----	----	----	----	----	----	----	----	----	----	----	----	----	----	----	----	----	----
PotVar0012048	A	G	----	----	----	----	----	----	----	----	----	----	----	----	----	----	----	----	----	----	----	----	----	----	----	----	----	----	----	----	----	----	----	----	----	----	----	----	----	----	----	----	----	----	----	----	----	----	----
PotVar0012050	A	G	GGGG	GGGG	AGGG	AGGG	GGGG	AGGG	AAGG	AGGG	GGGG	GGGG	AGGG	AGGG	AAAG	GGGG	AGGG	GGGG	AGGG	AAGG	AAGG	GGGG	GGGG	GGGG	GGGG	GGGG	AAGG	AAGG	GGGG	GGGG	GGGG	AGGG	AGGG	GGGG	GGGG	GGGG	AGGG	GGGG	AGGG	AGGG	GGGG	GGGG	AAGG	AGGG	AAAG	AGGG	AGGG	AGGG	AGGG
PotVar0012073	A	G	AAGG	AAGG	AGGG	GGGG	GGGG	AGGG	GGGG	AGGG	GGGG	AGGG	AGGG	GGGG	AGGG	AAGG	AGGG	AAGG	GGGG	GGGG	AGGG	AGGG	AAGG	GGGG	GGGG	AAGG	AGGG	AGGG	AAGG	AGGG	GGGG	GGGG	AGGG	AAGG	GGGG	AAGG	GGGG	AGGG	GGGG	GGGG	AGGG	GGGG	AGGG	AGGG	GGGG	GGGG	GGGG	AGGG	AAGG
PotVar0012076	A	G	AAAG	----	AAAG	AAGG	AAGG	AAAG	AAAA	AAAA	AGGG	AAAA	AAAA	AAAG	AAAA	AAGG	AAGG	AAAG	AGGG	AAGG	AAAG	----	AAAG	AAAG	AAAG	AAGG	AAAG	AAAG	AAAA	AAAA	AAGG	AAAA	AGGG	AAAG	AAAG	AAAG	AAAG	----	AAGG	AAAA	AAGG	AAAG	AAAA	AAAG	AAAG	AAAA	AAAA	AAAG	AAAA
PotVar0012077	T	C	----	----	----	----	----	----	----	----	----	----	----	----	----	----	----	----	----	----	----	----	----	----	----	----	----	----	----	----	----	----	----	----	----	----	----	----	----	----	----	----	----	----	----	----	----	----	----
PotVar0012114	T	C	----	----	----	----	----	----	----	----	----	----	----	----	----	----	----	----	----	----	----	----	----	----	----	----	----	----	----	----	----	----	----	----	----	----	----	----	----	----	----	----	----	----	----	----	----	----	----
PotVar0012115	T	C	CCCC	CCCC	CCCC	CCCC	CCCC	CCCC	CCCC	CCCC	CCCC	CCCC	CCCC	CCCC	CCCC	CCCC	CCCC	CCCC	CCCC	CCCC	CCCC	CCCC	CCCC	CCCC	CCCC	CCCC	CCCC	CCCC	CCCC	CCCC	CCCC	CCCC	CCCC	CCCC	CCCC	CCCC	CCCC	CCCC	CCCC	CCCC	CCCC	CCCC	CCCC	CCCC	CCCC	CCCC	CCCC	CCCC	CCCC
PotVar0012116	A	C	----	----	----	----	----	----	----	----	----	----	----	----	----	----	----	----	----	----	----	----	----	----	----	----	----	----	----	----	----	----	----	----	----	----	----	----	----	----	----	----	----	----	----	----	----	----	----
PotVar0012125	A	C	AAAA	AAAA	AAAA	AAAC	AAAC	AAAA	AAAC	AAAA	AAAA	AAAA	AAAA	AAAA	AAAA	AAAC	AACC	AAAA	AAAA	AAAC	AAAA	AAAC	AAAA	AAAC	AAAA	AAAA	AAAA	AAAA	AAAA	----	AAAC	AAAC	AAAA	AAAA	AAAA	AAAC	AAAC	AAAA	AAAA	AAAA	AAAC	AACC	AAAA	AAAA	AAAC	AAAC	AAAC	AAAA	AAAA
PotVar0012126	A	C	----	----	----	----	----	----	----	----	----	----	----	----	----	----	----	----	----	----	----	----	----	----	----	----	----	----	----	----	----	----	----	----	----	----	----	----	----	----	----	----	----	----	----	----	----	----	----
PotVar0012230	A	C	AAAA	AAAA	AAAA	AAAA	AAAA	AAAA	AAAA	AAAA	AAAA	AAAA	AAAA	AAAA	AAAA	AAAA	AAAA	AAAA	AAAA	AAAA	AAAA	AAAA	AAAA	AAAC	AAAC	AAAA	AAAA	AAAA	AAAA	AAAA	AAAA	AAAA	AAAA	AAAA	AAAC	AAAA	AAAC	AAAA	AAAA	AAAA	AAAA	AAAA	AAAA	AAAA	AAAA	AAAA	AAAA	AAAA	AAAA
PotVar0012233	T	C	----	----	----	----	----	----	----	----	----	----	----	----	----	----	----	----	----	----	----	----	----	----	----	----	----	----	----	----	----	----	----	----	----	----	----	----	----	----	----	----	----	----	----	----	----	----	----
PotVar0012243	T	C	TTTT	TTTT	TTTT	TTTT	TTTT	TTTC	TTTT	TTTT	TTTT	TTTC	TTTT	TTTT	TTTT	TTTT	TTTT	TTTT	TTTT	TTTT	TTTT	TTTT	TTTT	TTTT	TTTT	TTTT	TTTT	TTTT	TTTT	TTTC	TTTT	TTTT	TTTT	TTTT	TTTT	TTTT	TTTT	TTTT	TTTT	TTTT	TTTT	TTTT	TTTT	TTTT	TTTT	TTTT	TTTT	TTTT	TTTT
PotVar0012263	T	G	----	----	----	----	----	----	----	----	----	----	----	----	----	----	----	----	----	----	----	----	----	----	----	----	----	----	----	----	----	----	----	----	----	----	----	----	----	----	----	----	----	----	----	----	----	----	----
PotVar0012274	T	C	CCCC	CCCC	TCCC	CCCC	CCCC	TTCC	TCCC	CCCC	CCCC	TCCC	CCCC	CCCC	TTCC	CCCC	CCCC	CCCC	CCCC	CCCC	TCCC	CCCC	TCCC	TCCC	TTCC	TCCC	TCCC	TCCC	TCCC	TTCC	CCCC	TCCC	CCCC	TCCC	TTCC	CCCC	TCCC	CCCC	CCCC	CCCC	CCCC	TCCC	CCCC	TTCC	CCCC	CCCC	TCCC	CCCC	TCCC
PotVar0012284	A	G	AAGG	AAAG	AAAA	AAAG	AAAA	AAAA	AAAG	AAGG	AAAA	AAGG	AAAG	AAAG	AGGG	AAAG	AAGG	AAAG	AAAA	AAGG	AAAG	AAAG	AAAA	----	AAAA	AAAA	AAAG	AAAG	AAAG	AAAA	AAAA	AAAG	AAAA	AAAA	AAAA	AAAA	AAAG	AAAG	AAAA	AAAG	AAAG	AAAA	AGGG	AAAA	AGGG	AAGG	AAAA	AAGG	AAAG
PotVar0012294	A	G	----	----	----	----	----	----	----	----	----	----	----	----	----	----	----	----	----	----	----	----	----	----	----	----	----	----	----	----	----	----	----	----	----	----	----	----	----	----	----	----	----	----	----	----	----	----	----
PotVar0012301	A	G	GGGG	GGGG	GGGG	GGGG	GGGG	GGGG	GGGG	GGGG	GGGG	GGGG	GGGG	GGGG	GGGG	GGGG	GGGG	GGGG	GGGG	GGGG	GGGG	GGGG	GGGG	GGGG	GGGG	GGGG	GGGG	GGGG	GGGG	AGGG	GGGG	GGGG	GGGG	GGGG	GGGG	GGGG	GGGG	GGGG	GGGG	GGGG	GGGG	GGGG	GGGG	GGGG	GGGG	GGGG	GGGG	GGGG	GGGG
PotVar0012305	A	G	GGGG	GGGG	GGGG	GGGG	GGGG	GGGG	GGGG	GGGG	GGGG	GGGG	GGGG	GGGG	GGGG	GGGG	GGGG	AGGG	GGGG	GGGG	GGGG	GGGG	GGGG	GGGG	GGGG	GGGG	GGGG	GGGG	GGGG	AGGG	GGGG	GGGG	GGGG	AGGG	GGGG	GGGG	GGGG	GGGG	GGGG	GGGG	GGGG	GGGG	GGGG	GGGG	GGGG	GGGG	GGGG	GGGG	GGGG
PotVar0012325	T	C	CCCC	CCCC	CCCC	TCCC	CCCC	CCCC	CCCC	TCCC	CCCC	CCCC	TCCC	TCCC	TCCC	CCCC	CCCC	CCCC	CCCC	TCCC	TCCC	CCCC	CCCC	CCCC	CCCC	CCCC	TCCC	TCCC	CCCC	CCCC	CCCC	TCCC	CCCC	CCCC	CCCC	CCCC	TCCC	CCCC	CCCC	TCCC	CCCC	CCCC	TTCC	CCCC	TTCC	TCCC	CCCC	TCCC	CCCC
PotVar0012337	A	G	GGGG	GGGG	AGGG	AGGG	AGGG	AGGG	AAGG	GGGG	GGGG	GGGG	AGGG	GGGG	GGGG	AAGG	AGGG	GGGG	GGGG	AGGG	AGGG	AGGG	AGGG	AGGG	GGGG	AGGG	GGGG	GGGG	GGGG	----	AAAG	AGGG	AGGG	GGGG	GGGG	AGGG	AGGG	AGGG	GGGG	GGGG	AAGG	AGGG	GGGG	AGGG	GGGG	AGGG	AGGG	GGGG	AGGG
PotVar0012338	T	G	TTTG	TTTT	TTGG	TTTT	TTGG	TTTT	TTTT	TTGG	TTTG	TTTG	TTTG	TTGG	TTTT	TTTT	TTTT	TTGG	TTTT	TTTT	TTTT	TTTG	TTTG	TTTG	TTTG	TTGG	TTTT	TTTT	TTGG	TTGG	TTTT	TTTG	TTTT	TTGG	TTTG	TTTG	TTTT	TTTG	TTGG	TGGG	TTTT	TTTT	TTTG	TTTG	TTTG	TTTG	TTTG	TTTG	TTTT
PotVar0012370	A	G	AAAA	AAAA	AAAA	AAAA	AAAA	AAAA	AAAA	AAAA	AAAA	AAAA	AAAA	AAAA	AAAA	AAAA	AAAA	AAAA	AAAA	AAAA	AAAA	AAAA	AAAA	AAAA	AAAA	AAAA	AAAA	AAAA	AAAA	AAAA	AAAA	AAAA	AAAA	AAAA	AAAA	AAAA	AAAA	AAAA	AAAA	AAAA	AAAA	AAAA	AAAA	AAAA	AAAA	AAAA	AAAA	AAAA	AAAA
PotVar0012376	A	C	ACCC	ACCC	AACC	ACCC	AACC	AACC	AAAC	CCCC	CCCC	CCCC	ACCC	ACCC	AACC	AACC	AACC	CCCC	AAAC	AACC	AAAC	ACCC	AAAC	ACCC	ACCC	AACC	ACCC	ACCC	ACCC	ACCC	AAAA	AACC	ACCC	ACCC	ACCC	AAAC	ACCC	AACC	AACC	CCCC	AAAC	AAAA	CCCC	AAAC	CCCC	ACCC	AACC	CCCC	AAAC
PotVar0012377	A	G	GGGG	GGGG	AGGG	AGGG	GGGG	AAGG	AGGG	AGGG	GGGG	AGGG	AGGG	AGGG	AAAG	GGGG	GGGG	GGGG	GGGG	AGGG	AAGG	GGGG	AGGG	AGGG	AAGG	AGGG	AAGG	AAGG	AGGG	----	GGGG	AAGG	GGGG	AGGG	AAGG	GGGG	AAGG	GGGG	GGGG	AGGG	GGGG	AGGG	AAGG	AAGG	AAGG	AGGG	AGGG	AGGG	AGGG
PotVar0012431	A	C	CCCC	CCCC	CCCC	CCCC	CCCC	CCCC	CCCC	CCCC	CCCC	CCCC	CCCC	CCCC	CCCC	CCCC	CCCC	CCCC	CCCC	CCCC	CCCC	CCCC	CCCC	CCCC	CCCC	CCCC	CCCC	CCCC	CCCC	CCCC	CCCC	CCCC	CCCC	CCCC	CCCC	CCCC	CCCC	CCCC	CCCC	CCCC	CCCC	CCCC	CCCC	CCCC	CCCC	CCCC	CCCC	CCCC	CCCC
PotVar0012441	T	C	TCCC	CCCC	TTCC	CCCC	TTCC	CCCC	CCCC	TTCC	TCCC	TCCC	TCCC	TTCC	CCCC	CCCC	CCCC	TTCC	CCCC	CCCC	CCCC	TCCC	TCCC	TCCC	TCCC	TTCC	CCCC	CCCC	TTCC	TCCC	CCCC	TCCC	CCCC	TTCC	TCCC	TCCC	CCCC	TCCC	TTCC	TTTC	CCCC	CCCC	TCCC	TCCC	TCCC	TCCC	TCCC	TCCC	CCCC
PotVar0012446	A	G	AAGG	AAGG	AAAA	AAGG	AAAA	AAAG	AAAG	AAAG	AGGG	AAGG	AAAG	AAAA	AAAG	AAGG	AAGG	AAAG	AAAG	AAAG	AAAA	AAGG	AAAA	AAAG	AAAG	AAAA	AAGG	AAGG	AAAG	----	AAAA	AAAA	AGGG	AAAA	AAAG	AAAA	AAAG	AAAG	AAAA	AAAA	AAAG	AAAA	AAAG	AAAA	AAAG	AAAG	AAAG	AAGG	AAAG
PotVar0012491	T	G	----	----	----	----	----	----	----	----	----	----	----	----	----	----	----	----	----	----	----	----	----	----	----	----	----	----	----	----	----	----	----	----	----	----	----	----	----	----	----	----	----	----	----	----	----	----	----
PotVar0012493	A	G	----	----	----	----	----	----	----	----	----	----	----	----	----	----	----	----	----	----	----	----	----	----	----	----	----	----	----	----	----	----	----	----	----	----	----	----	----	----	----	----	----	----	----	----	----	----	----
PotVar0012506	T	G	----	----	----	----	----	----	----	----	----	----	----	----	----	----	----	----	----	----	----	----	----	----	----	----	----	----	----	----	----	----	----	----	----	----	----	----	----	----	----	----	----	----	----	----	----	----	----
PotVar0012531	A	G	----	----	----	----	----	----	----	----	----	----	----	----	----	----	----	----	----	----	----	----	----	----	----	----	----	----	----	----	----	----	----	----	----	----	----	----	----	----	----	----	----	----	----	----	----	----	----
PotVar0012533	T	C	TCCC	TTTC	CCCC	TTCC	TCCC	TCCC	CCCC	CCCC	TTTC	CCCC	TCCC	TCCC	CCCC	TCCC	TCCC	CCCC	TTTT	TCCC	TCCC	TCCC	TCCC	TCCC	TCCC	CCCC	TTCC	TTCC	CCCC	CCCC	TCCC	CCCC	TTTC	CCCC	TCCC	TTCC	TCCC	TCCC	TTCC	CCCC	TCCC	TTCC	CCCC	CCCC	CCCC	CCCC	TCCC	TCCC	TCCC
PotVar0012538	A	G	GGGG	GGGG	AGGG	GGGG	GGGG	AGGG	AGGG	GGGG	GGGG	GGGG	GGGG	GGGG	AAAG	GGGG	GGGG	GGGG	GGGG	GGGG	AGGG	GGGG	AGGG	GGGG	AGGG	AGGG	AGGG	AGGG	AGGG	AGGG	GGGG	AGGG	GGGG	AGGG	AGGG	GGGG	GGGG	GGGG	GGGG	GGGG	GGGG	AGGG	GGGG	AAGG	GGGG	GGGG	AGGG	GGGG	AGGG
PotVar0012596	A	C	ACCC	ACCC	AACC	CCCC	AACC	AACC	ACCC	ACCC	ACCC	ACCC	AACC	ACCC	ACCC	CCCC	CCCC	ACCC	CCCC	ACCC	CCCC	CCCC	CCCC	ACCC	AACC	CCCC	ACCC	ACCC	CCCC	CCCC	CCCC	CCCC	ACCC	ACCC	AACC	----	ACCC	CCCC	CCCC	CCCC	AACC	AACC	ACCC	CCCC	AACC	ACCC	ACCC	CCCC	ACCC
PotVar0012598	A	G	AGGG	AAGG	AAGG	AAAG	AGGG	GGGG	AGGG	AGGG	AAGG	AGGG	GGGG	AAAG	GGGG	AAGG	AAGG	AGGG	AAAG	AAGG	AGGG	AAAA	AGGG	AAGG	GGGG	AAGG	AGGG	AGGG	AAGG	AGGG	AGGG	AAGG	AGGG	AGGG	GGGG	AAAG	AAGG	AAAA	AAAG	AAGG	GGGG	AGGG	AAAG	AGGG	GGGG	AAGG	AGGG	AAGG	GGGG
PotVar0012599	T	C	TCCC	TCCC	CCCC	CCCC	CCCC	TCCC	CCCC	TCCC	TCCC	TTCC	TCCC	CCCC	TTCC	TCCC	CCCC	CCCC	TCCC	TCCC	TTCC	CCCC	TTCC	TCCC	TCCC	TTCC	CCCC	CCCC	TCCC	TTCC	TCCC	CCCC	TCCC	CCCC	TCCC	CCCC	TCCC	CCCC	CCCC	TCCC	CCCC	TCCC	CCCC	TTCC	TCCC	CCCC	TCCC	TCCC	TCCC
PotVar0012710	A	G	GGGG	GGGG	GGGG	GGGG	GGGG	GGGG	AGGG	GGGG	GGGG	GGGG	----	GGGG	GGGG	GGGG	GGGG	GGGG	GGGG	GGGG	GGGG	GGGG	GGGG	GGGG	GGGG	GGGG	GGGG	GGGG	GGGG	GGGG	GGGG	AGGG	GGGG	GGGG	GGGG	GGGG	GGGG	GGGG	GGGG	AGGG	GGGG	GGGG	GGGG	GGGG	GGGG	GGGG	GGGG	GGGG	GGGG
PotVar0012744	T	C	----	----	----	----	----	----	----	----	----	----	----	----	----	----	----	----	----	----	----	----	----	----	----	----	----	----	----	----	----	----	----	----	----	----	----	----	----	----	----	----	----	----	----	----	----	----	----
PotVar0012749	A	G	GGGG	GGGG	GGGG	GGGG	GGGG	GGGG	GGGG	GGGG	GGGG	GGGG	GGGG	GGGG	GGGG	GGGG	GGGG	GGGG	AGGG	GGGG	GGGG	GGGG	GGGG	GGGG	GGGG	GGGG	GGGG	GGGG	GGGG	GGGG	GGGG	GGGG	GGGG	GGGG	GGGG	GGGG	GGGG	GGGG	GGGG	GGGG	GGGG	AGGG	GGGG	GGGG	GGGG	GGGG	GGGG	GGGG	GGGG
PotVar0012756	T	C	----	----	----	----	----	----	----	----	----	----	----	----	----	----	----	----	----	----	----	----	----	----	----	----	----	----	----	----	----	----	----	----	----	----	----	----	----	----	----	----	----	----	----	----	----	----	----
PotVar0012782	T	C	----	----	----	----	----	----	----	----	----	----	----	----	----	----	----	----	----	----	----	----	----	----	----	----	----	----	----	----	----	----	----	----	----	----	----	----	----	----	----	----	----	----	----	----	----	----	----
PotVar0012785	T	C	----	----	----	----	----	----	----	----	----	----	----	----	----	----	----	----	----	----	----	----	----	----	----	----	----	----	----	----	----	----	----	----	----	----	----	----	----	----	----	----	----	----	----	----	----	----	----
PotVar0012788	A	G	GGGG	GGGG	GGGG	GGGG	GGGG	GGGG	AGGG	GGGG	GGGG	GGGG	GGGG	GGGG	GGGG	GGGG	GGGG	GGGG	GGGG	GGGG	GGGG	GGGG	GGGG	GGGG	GGGG	GGGG	GGGG	GGGG	GGGG	GGGG	GGGG	AGGG	GGGG	GGGG	GGGG	GGGG	GGGG	GGGG	GGGG	AGGG	GGGG	GGGG	GGGG	GGGG	GGGG	GGGG	GGGG	GGGG	GGGG
PotVar0012789	T	C	CCCC	CCCC	CCCC	CCCC	CCCC	CCCC	CCCC	CCCC	CCCC	CCCC	CCCC	CCCC	CCCC	CCCC	CCCC	CCCC	CCCC	CCCC	CCCC	CCCC	CCCC	CCCC	CCCC	CCCC	CCCC	CCCC	CCCC	CCCC	CCCC	CCCC	CCCC	CCCC	CCCC	CCCC	CCCC	CCCC	CCCC	CCCC	CCCC	CCCC	CCCC	CCCC	CCCC	CCCC	CCCC	CCCC	CCCC
PotVar0012806	T	G	GGGG	GGGG	GGGG	GGGG	GGGG	GGGG	TTTG	GGGG	GGGG	GGGG	GGGG	GGGG	GGGG	GGGG	GGGG	TGGG	GGGG	GGGG	GGGG	GGGG	GGGG	GGGG	GGGG	TGGG	GGGG	GGGG	GGGG	GGGG	GGGG	TGGG	GGGG	TGGG	GGGG	GGGG	GGGG	GGGG	GGGG	TGGG	GGGG	GGGG	GGGG	GGGG	GGGG	GGGG	TGGG	GGGG	TGGG
PotVar0012868	T	G	----	----	----	----	----	----	----	----	----	----	----	----	----	----	----	----	----	----	----	----	----	----	----	----	----	----	----	----	----	----	----	----	----	----	----	----	----	----	----	----	----	----	----	----	----	----	----
PotVar0012912	T	C	TCCC	CCCC	CCCC	TCCC	TTCC	CCCC	TCCC	CCCC	TCCC	TCCC	CCCC	TTCC	TCCC	CCCC	CCCC	----	TTCC	CCCC	TCCC	TTCC	TCCC	TCCC	TCCC	TCCC	TCCC	TCCC	TTCC	TCCC	CCCC	TCCC	TTCC	TTTC	TCCC	TCCC	TCCC	TCCC	----	TTCC	TCCC	TCCC	TCCC	TCCC	TCCC	TTCC	CCCC	TTCC	TCCC
PotVar0012923	T	G	TGGG	TTTG	TTGG	TTGG	TTTT	TTGG	TTTT	TTTT	TTTT	TTTG	TTTG	TTTG	TTTT	TTTG	TTTT	TTGG	TTTT	TTTG	TTTT	TTTT	TTTT	TTTT	TTTT	TTTT	TTGG	TTGG	TTTG	TTTG	TTTT	TTTT	TTTT	TTTT	TTTT	TTTT	TTTG	TTTT	TTTT	TTTG	TTTT	TTTT	TTTG	TTTT	TTTG	TTTT	TTTG	TTTT	TTTT
PotVar0012947	T	C	TTTC	TTTT	TTTT	TTTC	TTCC	TTTT	TTTC	TTTT	TTTC	TTTC	TTTT	TTCC	TTTC	TTTT	TTTT	----	TTCC	TTTT	TTTC	TTTC	TTTC	----	TTTC	TTTC	TTTC	TTTC	TTCC	TTTC	TTTT	TTTC	TTCC	TCCC	TTTC	TTTC	TTTT	TTTC	TTTC	TTCC	TTTC	TTTC	TTTC	TTTC	TTTC	TTCC	TTTT	TTCC	TTTC
PotVar0012951	A	G	AAAA	AAAA	AAAA	AAAA	AAAA	AAAA	AAAA	AAAG	AAAG	AAAA	AAAA	AAAA	AAAA	AAAA	AAAA	AAAA	AAAA	AAAA	AAAA	AAAG	AAAA	AAAA	AAAG	AAAA	AAAA	AAAA	AAAA	AAAA	AAAA	AAAG	AAAA	AAAA	AAAG	AAAA	AAAA	AAAA	AAAA	AAAA	AAGG	AAAA	AAAA	AAAA	AAAA	AAAA	AAAA	AAAA	AAAA
PotVar0012966	T	C	----	----	----	----	----	----	----	----	----	----	----	----	----	----	----	----	----	----	----	----	----	----	----	----	----	----	----	----	----	----	----	----	----	----	----	----	----	----	----	----	----	----	----	----	----	----	----
PotVar0012980	T	C	----	----	----	----	----	----	----	----	----	----	----	----	----	----	----	----	----	----	----	----	----	----	----	----	----	----	----	----	----	----	----	----	----	----	----	----	----	----	----	----	----	----	----	----	----	----	----
PotVar0012983	T	C	CCCC	TTCC	CCCC	CCCC	CCCC	TCCC	CCCC	CCCC	CCCC	CCCC	TCCC	CCCC	TCCC	CCCC	TTCC	TTCC	CCCC	CCCC	TCCC	CCCC	TCCC	----	CCCC	TCCC	CCCC	CCCC	TCCC	CCCC	CCCC	CCCC	TCCC	TCCC	CCCC	TCCC	CCCC	CCCC	TCCC	CCCC	CCCC	CCCC	CCCC	TTCC	CCCC	CCCC	CCCC	CCCC	CCCC
PotVar0012984	T	C	TCCC	TTTC	TTCC	TTCC	TTTC	TTCC	TTTC	TTTT	TTTT	TTTC	TTTC	----	TTTT	TTCC	TTTT	TTCC	TTTT	TTTC	TTTT	TTTT	TTTC	TTTT	TTTT	TTTC	TCCC	TCCC	TTTC	TTTC	TTTC	TTTT	TTTT	TTTT	TTTT	TTTT	TTTC	TTTC	TTTT	TTCC	TTTT	TTTT	TTTC	TTTT	TTTC	TTTT	TTCC	TTTC	TTTC
PotVar0012995	A	G	GGGG	GGGG	GGGG	GGGG	GGGG	GGGG	GGGG	GGGG	GGGG	GGGG	GGGG	GGGG	GGGG	GGGG	GGGG	GGGG	GGGG	GGGG	GGGG	GGGG	GGGG	AGGG	AGGG	GGGG	GGGG	GGGG	GGGG	GGGG	GGGG	GGGG	GGGG	GGGG	AGGG	GGGG	GGGG	GGGG	GGGG	GGGG	GGGG	GGGG	GGGG	GGGG	GGGG	GGGG	GGGG	GGGG	GGGG
PotVar0012999	A	G	GGGG	AAGG	GGGG	GGGG	GGGG	AGGG	GGGG	GGGG	GGGG	GGGG	AGGG	GGGG	AGGG	GGGG	AAGG	AAGG	GGGG	GGGG	AGGG	GGGG	AGGG	----	GGGG	AGGG	GGGG	GGGG	AGGG	GGGG	GGGG	GGGG	AGGG	AGGG	GGGG	AGGG	GGGG	GGGG	AGGG	GGGG	GGGG	GGGG	GGGG	AAGG	GGGG	GGGG	GGGG	GGGG	GGGG
PotVar0013003	T	G	GGGG	GGGG	GGGG	GGGG	GGGG	GGGG	TGGG	TGGG	GGGG	TGGG	TGGG	GGGG	GGGG	GGGG	TGGG	GGGG	TGGG	TGGG	TGGG	TGGG	GGGG	----	TGGG	TGGG	GGGG	GGGG	GGGG	TGGG	GGGG	TGGG	TGGG	GGGG	TGGG	GGGG	TTTG	GGGG	TGGG	GGGG	GGGG	GGGG	TGGG	GGGG	GGGG	GGGG	TTGG	GGGG	TGGG
PotVar0013016	T	C	CCCC	CCCC	CCCC	CCCC	CCCC	CCCC	CCCC	TCCC	CCCC	TCCC	CCCC	CCCC	CCCC	CCCC	CCCC	CCCC	CCCC	CCCC	CCCC	TCCC	CCCC	TCCC	CCCC	CCCC	CCCC	CCCC	CCCC	TCCC	CCCC	CCCC	CCCC	CCCC	CCCC	CCCC	TCCC	CCCC	TTCC	CCCC	CCCC	CCCC	TCCC	CCCC	CCCC	CCCC	TTCC	CCCC	CCCC
PotVar0013034	A	G	GGGG	GGGG	GGGG	GGGG	GGGG	GGGG	AGGG	GGGG	GGGG	GGGG	GGGG	GGGG	GGGG	GGGG	AGGG	GGGG	AGGG	AGGG	AGGG	GGGG	GGGG	GGGG	GGGG	AGGG	GGGG	GGGG	GGGG	GGGG	GGGG	AGGG	GGGG	GGGG	GGGG	GGGG	AGGG	GGGG	GGGG	GGGG	GGGG	GGGG	GGGG	GGGG	GGGG	GGGG	GGGG	GGGG	AGGG
PotVar0013081	T	C	----	----	----	----	----	----	----	----	----	----	----	----	----	----	----	----	----	----	----	----	----	----	----	----	----	----	----	----	----	----	----	----	----	----	----	----	----	----	----	----	----	----	----	----	----	----	----
PotVar0013097	T	C	CCCC	CCCC	CCCC	CCCC	CCCC	CCCC	CCCC	CCCC	CCCC	CCCC	CCCC	CCCC	CCCC	CCCC	CCCC	CCCC	CCCC	CCCC	CCCC	CCCC	CCCC	TCCC	TCCC	CCCC	CCCC	CCCC	CCCC	CCCC	CCCC	CCCC	CCCC	CCCC	TCCC	CCCC	CCCC	CCCC	CCCC	CCCC	CCCC	CCCC	CCCC	CCCC	CCCC	CCCC	CCCC	CCCC	CCCC
PotVar0013099	A	G	----	----	----	----	----	----	----	----	----	----	----	----	----	----	----	----	----	----	----	----	----	----	----	----	----	----	----	----	----	----	----	----	----	----	----	----	----	----	----	----	----	----	----	----	----	----	----
PotVar0013106	T	C	----	----	----	----	----	----	----	----	----	----	----	----	----	----	----	----	----	----	----	----	----	----	----	----	----	----	----	----	----	----	----	----	----	----	----	----	----	----	----	----	----	----	----	----	----	----	----
PotVar0013110	A	G	AAAA	AAAA	AAAA	AAAA	AAAA	AAAA	AAAG	AAAG	AAAA	AAAG	AAAG	AAAA	AAAA	AAAA	AAAG	AAAA	AAAG	AAAG	AAAG	AAAA	AAAA	AAAA	AAAA	AAAG	AAAA	AAAA	AAAA	AAAG	AAAA	AAAG	AAAA	AAAA	AAAA	AAAA	AAAG	AAAA	AAAA	AAAA	AAAA	AAAA	AAAG	AAAA	AAAA	AAAA	AAGG	AAAA	AAAG
PotVar0013114	T	C	TTTC	TTTT	TTTT	TTTC	TTCC	TTTT	TTCC	TTTC	TTTC	TTCC	TTTC	TTCC	TTTC	TTTT	TTTC	TTTC	TCCC	TTTC	TTCC	TTCC	TTTC	TTCC	TTCC	TTCC	TTTC	TTTC	TTCC	TTCC	TTTT	TTCC	TCCC	TCCC	TTCC	TTTC	TCCC	TTTC	TCCC	TTCC	TTTC	TTTC	TTCC	TTTC	TTTC	TTCC	TTTC	TTCC	TTCC
PotVar0013136	A	C	----	----	----	----	----	----	----	----	----	----	----	----	----	----	----	----	----	----	----	----	----	----	----	----	----	----	----	----	----	----	----	----	----	----	----	----	----	----	----	----	----	----	----	----	----	----	----
PotVar0013203	T	C	TCCC	CCCC	CCCC	CCCC	TCCC	CCCC	TCCC	TCCC	TCCC	CCCC	CCCC	CCCC	CCCC	TCCC	CCCC	TCCC	TTCC	TCCC	CCCC	CCCC	CCCC	CCCC	CCCC	TCCC	TCCC	TCCC	CCCC	CCCC	CCCC	TCCC	CCCC	CCCC	CCCC	TCCC	CCCC	----	CCCC	TCCC	CCCC	CCCC	TCCC	CCCC	TCCC	CCCC	CCCC	TCCC	CCCC
PotVar0013205	A	G	----	----	----	----	----	----	----	----	----	----	----	----	----	----	----	----	----	----	----	----	----	----	----	----	----	----	----	----	----	----	----	----	----	----	----	----	----	----	----	----	----	----	----	----	----	----	----
PotVar0013238	A	C	AAAA	AAAA	AACC	AAAA	AAAA	AAAC	AAAA	AAAA	AAAA	AAAA	AAAA	AAAA	AAAA	AAAA	AAAC	AAAA	AAAA	AACC	AAAA	AAAA	AAAA	AAAA	AAAA	AAAA	AAAA	AAAA	AAAA	AAAA	AAAA	AAAA	AAAA	AAAC	AAAA	AAAA	AAAA	AAAC	AAAA	AAAC	AAAA	AAAA	AAAA	AAAA	AAAC	AAAA	AAAA	AAAA	AAAC
PotVar0013241	A	C	CCCC	CCCC	CCCC	CCCC	CCCC	CCCC	CCCC	CCCC	CCCC	CCCC	CCCC	CCCC	CCCC	CCCC	CCCC	CCCC	CCCC	CCCC	CCCC	CCCC	CCCC	CCCC	CCCC	CCCC	CCCC	CCCC	CCCC	CCCC	CCCC	CCCC	CCCC	CCCC	CCCC	CCCC	CCCC	CCCC	CCCC	CCCC	CCCC	CCCC	CCCC	CCCC	CCCC	CCCC	CCCC	CCCC	CCCC
PotVar0013242	T	C	TCCC	TCCC	TTCC	CCCC	TCCC	TCCC	CCCC	TTCC	TTTC	TCCC	TTCC	CCCC	TTTC	TCCC	TCCC	CCCC	TCCC	TCCC	TTCC	TCCC	TTCC	----	TTCC	TCCC	TTCC	TTCC	TCCC	TCCC	CCCC	TCCC	CCCC	CCCC	TTCC	TCCC	TCCC	CCCC	CCCC	CCCC	CCCC	TCCC	CCCC	TTCC	CCCC	CCCC	TCCC	TTCC	CCCC
PotVar0013243	A	G	----	----	----	----	----	----	----	----	----	----	----	----	----	----	----	----	----	----	----	----	----	----	----	----	----	----	----	----	----	----	----	----	----	----	----	----	----	----	----	----	----	----	----	----	----	----	----
PotVar0013245	T	C	TTTT	TTTT	TTCC	TTTT	TTTT	TTTC	TTTT	TTTT	TTTT	TTTT	TTTT	TTTT	TTTT	TTTT	TTTC	TTTT	TTTT	TTTC	TTTT	TTTT	TTTT	TTTT	TTTT	TTTT	TTTT	TTTT	TTTT	TTTT	TTTT	TTTT	TTTT	TTTC	TTTT	TTTT	TTTT	TTTC	TTTT	TTTC	TTTT	TTTT	TTTT	TTTT	TTTC	TTTT	TTTT	TTTT	TTTC
PotVar0013315	A	G	AAAA	AAAA	AAAA	AAAA	AAAA	AAAA	AAAA	AAAA	AAAA	AAAA	AAAA	AAAA	AAAA	AAAA	AAAA	AAAA	AAAA	AAAA	AAAA	AAAA	AAAA	AAAG	AAAG	AAAA	AAAA	AAAA	AAAA	AAAA	AAAA	AAAA	AAAA	AAAA	AAAG	AAAA	AAAA	AAAA	AAAA	AAAA	AAAA	AAAA	AAAA	AAAA	AAAA	AAAA	AAAA	AAAA	AAAA
PotVar0013317	T	C	TCCC	CCCC	CCCC	CCCC	TCCC	CCCC	TCCC	CCCC	TCCC	CCCC	CCCC	CCCC	CCCC	TCCC	CCCC	TCCC	TTCC	TCCC	CCCC	CCCC	CCCC	CCCC	CCCC	TCCC	TCCC	TCCC	CCCC	CCCC	CCCC	TCCC	CCCC	CCCC	CCCC	TCCC	CCCC	TTCC	CCCC	TCCC	CCCC	CCCC	TCCC	CCCC	TCCC	CCCC	CCCC	TCCC	CCCC
PotVar0013322	T	C	TCCC	TTTC	CCCC	TTCC	TCCC	TCCC	TTCC	CCCC	CCCC	TTCC	TTCC	TCCC	CCCC	CCCC	TTCC	TCCC	CCCC	CCCC	TCCC	TCCC	TCCC	TCCC	TCCC	TCCC	TCCC	TCCC	TCCC	TCCC	TTCC	CCCC	TTCC	TCCC	TCCC	TCCC	TCCC	CCCC	TCCC	TTCC	CCCC	TTTC	TCCC	TTCC	TCCC	TCCC	TCCC	TCCC	TCCC
PotVar0013333	T	C	TCCC	CCCC	CCCC	TTCC	TCCC	TCCC	TCCC	TCCC	CCCC	TCCC	CCCC	TTCC	TCCC	TTCC	CCCC	TTCC	TCCC	CCCC	TCCC	TCCC	TCCC	TTCC	CCCC	TCCC	CCCC	CCCC	TTCC	TTCC	TCCC	TTCC	TTCC	TTCC	CCCC	TCCC	TTCC	TCCC	TTCC	CCCC	TTTC	CCCC	TTCC	CCCC	TCCC	TTTC	TCCC	CCCC	TTCC
PotVar0013337	T	G	TGGG	GGGG	GGGG	TTGG	TGGG	TGGG	TGGG	TGGG	GGGG	TGGG	GGGG	TTGG	TGGG	TTGG	GGGG	TTGG	TGGG	GGGG	TGGG	TGGG	TGGG	TTGG	GGGG	TGGG	GGGG	GGGG	TTGG	TTGG	TGGG	TTGG	TTGG	TTGG	GGGG	TGGG	TTGG	TGGG	TTTG	GGGG	TTTT	GGGG	TTGG	GGGG	TGGG	TTGG	----	GGGG	TTGG
PotVar0013345	A	G	AAAG	AAAG	AAGG	AAAA	AAAG	AAAG	AAAA	AAAG	AGGG	AAAG	AAGG	AAAA	AGGG	AAAG	AAAG	AAAA	AAAG	AAAG	AAGG	AAAG	AAGG	----	AAGG	AAAG	AAGG	AAGG	AAAG	AAAG	AAAG	AAAG	AAAA	AAAA	AAGG	AAAG	AAAG	AAAA	AAAA	AAAA	AAAA	AAAG	AAAA	AAGG	AAAA	AAAA	AAAG	AAGG	AAAA
PotVar0013382	A	G	AAAG	AAAG	GGGG	AAAA	AAAG	AAGG	AAAA	AGGG	AGGG	AAAG	AAGG	AAAG	AGGG	AAAG	AAGG	AAAA	AAAG	AGGG	AAGG	AAGG	AAGG	AAAG	AAGG	AAAG	AAGG	AAGG	AAAG	AAAG	AAAG	AAAG	AAAA	AAAG	AAGG	AAAG	AAAG	AAAG	AAAA	AAAG	AAAA	AAAG	AAAA	AAGG	AAAG	AAAA	----	AAGG	AAAG
PotVar0013387	A	G	----	----	----	----	----	----	----	----	----	----	----	----	----	----	----	----	----	----	----	----	----	----	----	----	----	----	----	----	----	----	----	----	----	----	----	----	----	----	----	----	----	----	----	----	----	----	----
PotVar0013389	A	G	----	----	----	----	----	----	----	----	----	----	----	----	----	----	----	----	----	----	----	----	----	----	----	----	----	----	----	----	----	----	----	----	----	----	----	----	----	----	----	----	----	----	----	----	----	----	----
PotVar0013408	A	G	GGGG	GGGG	GGGG	GGGG	GGGG	GGGG	GGGG	GGGG	GGGG	GGGG	GGGG	GGGG	GGGG	GGGG	GGGG	GGGG	GGGG	GGGG	GGGG	GGGG	GGGG	GGGG	GGGG	GGGG	GGGG	GGGG	GGGG	GGGG	GGGG	GGGG	GGGG	GGGG	GGGG	GGGG	GGGG	GGGG	GGGG	GGGG	GGGG	GGGG	GGGG	GGGG	GGGG	GGGG	GGGG	GGGG	GGGG
PotVar0013432	A	G	AAAA	AAAA	AAAG	AAAA	AAAA	AAAA	AAAA	AAAA	AAAA	AAAA	AAAA	AAAA	AAAG	AAAA	AAAA	AAAA	AAAA	AAAA	AAAA	AAAA	AAAA	AAAA	AAAA	AAAA	AAAG	AAAG	AAAA	AAAA	AAAA	AAAA	AAAA	AAAA	AAAA	AAAA	AAAA	AAAA	AAAA	AAAA	AAAA	AAAG	AAAA	AAAA	AAAA	AAAA	AAAA	AAAA	AAAA
PotVar0013433	T	C	TTTT	TTTT	TTTC	TTTC	TTTC	TTTT	TTTC	TTCC	TTTT	TTTC	TTTT	TCCC	TTTC	TTCC	TTTT	TTCC	TTTC	TTTT	TTTC	TTCC	TTTC	TTTC	TTTT	TTTC	TTTT	TTTT	TTCC	TTCC	TTTC	TTCC	TTCC	TTCC	TTTT	TTTT	TTTT	TTTC	TTCC	TTTT	CCCC	TTTT	TTCC	TTTT	TTTC	TTTT	TTTC	TTTT	TTTC
PotVar0013434	T	C	CCCC	TCCC	TCCC	TCCC	TCCC	CCCC	TTCC	TCCC	CCCC	TCCC	CCCC	TCCC	TCCC	TTCC	CCCC	TTCC	TCCC	CCCC	TCCC	TCCC	TCCC	TCCC	TCCC	TCCC	CCCC	CCCC	TTCC	TTCC	TTCC	TTCC	TTCC	TTCC	TCCC	CCCC	CCCC	TCCC	TTCC	CCCC	TTTT	CCCC	TTCC	TCCC	TCCC	TCCC	----	CCCC	TCCC
PotVar0013479	A	G	AGGG	AAGG	GGGG	AAAG	AAGG	AAAG	AGGG	GGGG	AAGG	AAAG	AAAG	AAGG	AAGG	AGGG	AAGG	AGGG	GGGG	GGGG	AAGG	AAGG	AAGG	AAGG	AAGG	AAGG	AAGG	AAGG	AAGG	AAGG	AGGG	AGGG	AGGG	AGGG	AAGG	AGGG	AAAG	GGGG	AGGG	AAGG	AGGG	AAAG	AGGG	AGGG	AGGG	AAGG	AGGG	AAGG	GGGG
PotVar0013480	T	C	TTTT	TTTT	TTTT	TTTT	TTTT	TTTT	TTTT	TTTT	TTTT	TTTT	TTTT	TTTT	TTTT	TTTT	TTTT	TTTT	TTTT	TTTT	TTTT	TTTT	TTTT	TTTT	TTTT	TTTT	TTTT	TTTT	TTTT	TTTT	TTTT	TTTT	TTTT	TTTT	TTTT	TTTT	TTTT	TTTT	TTTT	TTTT	TTTT	TTTT	TTTT	TTTT	TTTT	TTTT	TTTT	TTTT	TTTC
PotVar0013481	T	C	TTTT	TTTT	TTTT	TTTT	TTTT	TTTT	TTTT	TTTT	TTTT	TTTT	TTTT	TTTT	TTTT	TTTT	TTTT	TTTT	TTTT	TTTT	TTTT	TTTT	TTTT	----	TTTC	TTTT	TTTT	TTTT	TTTT	TTTT	TTTT	TTTT	TTTT	TTTT	TTTC	TTTT	TTTT	TTTT	TTTT	TTTT	TTTT	TTTT	TTTT	TTTT	TTTT	TTTT	TTTT	TTTT	TTTT
PotVar0013496	T	C	TCCC	TTCC	CCCC	TTTC	TTCC	TTTC	TCCC	CCCC	TTTC	TTTC	TTTC	TTCC	TTTC	TCCC	TTTC	TCCC	CCCC	TCCC	TTCC	TTCC	TTCC	TTCC	TTCC	TTCC	TTTC	TTTC	TTCC	TTCC	TCCC	TCCC	TCCC	TTCC	TTCC	TCCC	TTTC	CCCC	TCCC	TTTC	TCCC	TTTT	TCCC	TTCC	TTCC	TTCC	TCCC	TTCC	TCCC
PotVar0013510	T	C	TTCC	TTTT	TTTT	TTTT	TTTC	TTTT	TTTC	TTTT	TTTC	TTTT	TTTT	TTTT	TTTT	TTTC	TTTT	TTTC	TTCC	TTCC	TTTT	TTTT	TTTT	TTTC	TTTT	TTTC	TTTC	TTTC	TTTT	TTTT	TTTT	TTTC	TTTT	TTTT	TTTT	TTCC	TTTC	----	TTTC	TTTC	TTTT	TTTT	TTTC	TTTT	TTTC	TTTC	TTTT	TTTC	TTTT
PotVar0013517	T	G	----	----	----	----	----	----	----	----	----	----	----	----	----	----	----	----	----	----	----	----	----	----	----	----	----	----	----	----	----	----	----	----	----	----	----	----	----	----	----	----	----	----	----	----	----	----	----
PotVar0013533	T	C	TTTC	TTCC	TTTT	TCCC	TTTC	TTTC	TTTC	TTTT	TTTC	TTCC	TTCC	TCCC	TTTC	TTTT	TCCC	TTTC	TTTT	TTTC	TTTC	TTTC	TTTC	TTCC	TTTC	TTTC	TTCC	TTCC	TTTC	TTTC	TTTC	TTTT	TTTC	TTCC	TTTC	TTTC	TTCC	TTTT	TTTC	TCCC	TTTC	CCCC	TTTC	TTCC	TTCC	TTCC	TTCC	TTTC	TTTC
PotVar0013544	T	C	TTTT	TTTT	TTTT	TTTT	TTTT	TTTT	TTTT	TTTT	TTTC	TTTT	TTTT	TTTT	TTTC	TTTT	TTTC	TTTT	TTTT	----	TTTT	TTTT	TTTT	TTTT	TTTT	TTTT	TTTC	TTTC	TTTT	TTTT	TTTT	TTTT	TTTT	TTTC	TTTT	TTTT	TTTT	TTTT	TTTT	TTTC	TTTT	TTTC	TTTT	TTTC	TTTC	TTTT	TTTT	TTTT	TTTC
PotVar0013550	A	C	----	----	----	----	----	----	----	----	----	----	----	----	----	----	----	----	----	----	----	----	----	----	----	----	----	----	----	----	----	----	----	----	----	----	----	----	----	----	----	----	----	----	----	----	----	----	----
PotVar0013552	T	C	----	----	----	----	----	----	----	----	----	----	----	----	----	----	----	----	----	----	----	----	----	----	----	----	----	----	----	----	----	----	----	----	----	----	----	----	----	----	----	----	----	----	----	----	----	----	----
PotVar0013565	A	G	----	----	----	----	----	----	----	----	----	----	----	----	----	----	----	----	----	----	----	----	----	----	----	----	----	----	----	----	----	----	----	----	----	----	----	----	----	----	----	----	----	----	----	----	----	----	----
PotVar0013571	A	G	AAAA	AAAG	AAAA	AAAA	AAAA	AAAA	AAAA	AAAG	AAAA	AAAA	AAAA	AAAA	AAAA	AAAA	AAAA	AAAA	AAAG	AAAA	AAAA	AAAA	AAAA	AAAA	AAAA	AAAA	AAAA	AAAA	AAAA	AAAA	AAAA	AAAA	AAAA	AAAA	AAAA	AAAA	AAAA	AAAA	AAAA	AAAA	AAAA	AAAA	AAAA	AAAA	AAAA	AAAA	AAAA	AAAG	AAAA
PotVar0013573	T	C	TTTT	TTTT	TTTT	TTTT	TTTC	TTCC	TTTT	TTTT	TTCC	TTTC	TTTC	TTTT	TTCC	TTTC	TTTT	TTTT	TTTT	TTTT	TTTC	TTTC	TTTC	TTTT	TTTC	TTTC	TTTC	TTTC	TTTC	TTTC	TTTT	TTTC	TTTT	TTTT	TTTC	TTTT	TTTC	TTTT	TTTT	TTTT	TTTT	TTTT	TTTT	TTTT	TTTT	TTTT	TTTT	TTTC	TTTT
PotVar0013592	A	C	CCCC	ACCC	CCCC	CCCC	CCCC	CCCC	ACCC	CCCC	CCCC	CCCC	ACCC	CCCC	CCCC	CCCC	CCCC	CCCC	CCCC	CCCC	CCCC	CCCC	ACCC	CCCC	ACCC	CCCC	CCCC	CCCC	CCCC	CCCC	ACCC	CCCC	CCCC	CCCC	ACCC	ACCC	CCCC	CCCC	CCCC	CCCC	CCCC	CCCC	CCCC	ACCC	CCCC	ACCC	CCCC	CCCC	ACCC
PotVar0013631	A	G	AAAA	AAAG	AAAA	AAAA	AAAA	AAAA	AAAA	AAAG	AAAA	AAAA	AAAA	AAAA	AAAA	AAAA	AAAA	AAAA	AAAG	AAAA	AAAA	AAAA	AAAA	AAAA	AAAA	AAAA	AAAA	AAAA	AAAA	AAAA	AAAA	AAAA	AAAA	AAAA	AAAA	AAAA	AAAA	AAAA	AAAA	AAAA	AAAA	AAAA	AAAA	AAAA	AAAA	AAAA	AAAA	AAAG	AAAA
PotVar0013632	T	C	TTTT	TTTT	TTTT	TTTT	TTTT	TTTT	TTTT	TTCC	TTTT	TTTT	TTTT	TTTC	TTTT	TTTT	TTTT	TTTT	TTTT	TTTC	TTTT	TTTC	TTTT	TTTT	TTTT	TTTT	TTTT	TTTT	TTTT	TTTT	TTTT	TTTT	TTTT	TTTT	TTTT	TTTT	TTTT	TTTT	TTTT	TTTT	TTTT	TTTT	TTTT	TTTT	TTTT	TTTT	TTTT	TTTT	TTTT
PotVar0013683	T	C	----	----	----	----	----	----	----	----	----	----	----	----	----	----	----	----	----	----	----	----	----	----	----	----	----	----	----	----	----	----	----	----	----	----	----	----	----	----	----	----	----	----	----	----	----	----	----
PotVar0013695	T	C	TCCC	CCCC	TTTC	TCCC	TCCC	TCCC	TCCC	TCCC	CCCC	TCCC	CCCC	TCCC	TCCC	TTCC	TCCC	TTCC	TCCC	CCCC	TTCC	TCCC	TCCC	----	CCCC	TCCC	CCCC	CCCC	TTCC	TTCC	TCCC	TTCC	TTTC	TTCC	CCCC	CCCC	CCCC	TTCC	TTCC	CCCC	TTTC	CCCC	TTCC	TCCC	TCCC	CCCC	TTTC	CCCC	TCCC
PotVar0013696	T	C	----	----	----	----	----	----	----	----	----	----	----	----	----	----	----	----	----	----	----	----	----	----	----	----	----	----	----	----	----	----	----	----	----	----	----	----	----	----	----	----	----	----	----	----	----	----	----
PotVar0013757	T	C	CCCC	CCCC	CCCC	CCCC	CCCC	CCCC	CCCC	CCCC	CCCC	CCCC	CCCC	CCCC	CCCC	CCCC	CCCC	CCCC	CCCC	CCCC	CCCC	CCCC	CCCC	CCCC	----	CCCC	CCCC	CCCC	CCCC	CCCC	CCCC	CCCC	CCCC	CCCC	----	CCCC	CCCC	CCCC	CCCC	CCCC	CCCC	CCCC	CCCC	CCCC	CCCC	CCCC	CCCC	CCCC	CCCC
PotVar0013766	T	G	TTTG	GGGG	TTTG	TGGG	TTTG	TTTG	TTGG	TTTG	TTTG	TTGG	TGGG	TTGG	TTTG	TTTT	TGGG	TTTG	TTTG	TTTG	TTTG	TTTG	TTGG	TTGG	TTGG	TTTG	TTGG	TTGG	TTTG	TTTG	TGGG	TTTT	TTTG	TTGG	TTGG	TTGG	TTGG	TTTT	TTTG	TGGG	TTTG	GGGG	TTTG	TGGG	TTGG	TGGG	TTTG	TTGG	TTGG
PotVar0013778	A	G	GGGG	GGGG	GGGG	GGGG	GGGG	GGGG	GGGG	GGGG	GGGG	GGGG	GGGG	GGGG	GGGG	GGGG	GGGG	GGGG	GGGG	GGGG	GGGG	GGGG	GGGG	GGGG	GGGG	GGGG	GGGG	GGGG	GGGG	GGGG	GGGG	GGGG	GGGG	GGGG	GGGG	GGGG	GGGG	GGGG	GGGG	GGGG	GGGG	GGGG	GGGG	GGGG	GGGG	GGGG	GGGG	GGGG	AGGG
PotVar0013805	A	G	GGGG	AGGG	GGGG	GGGG	GGGG	GGGG	GGGG	GGGG	GGGG	GGGG	GGGG	GGGG	GGGG	GGGG	GGGG	GGGG	AGGG	GGGG	GGGG	GGGG	GGGG	GGGG	GGGG	GGGG	GGGG	GGGG	GGGG	GGGG	AGGG	GGGG	GGGG	GGGG	GGGG	GGGG	GGGG	GGGG	GGGG	GGGG	GGGG	GGGG	GGGG	GGGG	GGGG	GGGG	GGGG	AGGG	GGGG
PotVar0013806	A	G	----	----	----	----	----	----	----	----	----	----	----	----	----	----	----	----	----	----	----	----	----	----	----	----	----	----	----	----	----	----	----	----	----	----	----	----	----	----	----	----	----	----	----	----	----	----	----
PotVar0013813	T	G	----	----	----	----	----	----	----	----	----	----	----	----	----	----	----	----	----	----	----	----	----	----	----	----	----	----	----	----	----	----	----	----	----	----	----	----	----	----	----	----	----	----	----	----	----	----	----
PotVar0013816	T	C	TTTC	----	CCCC	TTTC	TTCC	TCCC	TTTC	TTCC	TTCC	TTCC	TTTC	TTTC	CCCC	TCCC	TTTC	TTTC	TTTC	TTTT	TCCC	TTCC	TTCC	----	TTCC	----	TTCC	TTCC	TTCC	TTCC	----	TCCC	TTCC	TTCC	TTCC	TTTT	TTTC	TTCC	TTCC	TTTT	TCCC	TTCC	TTCC	TTCC	TTCC	TTTC	TCCC	TTTC	TTTC
PotVar0013845	A	C	----	----	----	----	----	----	----	----	----	----	----	----	----	----	----	----	----	----	----	----	----	----	----	----	----	----	----	----	----	----	----	----	----	----	----	----	----	----	----	----	----	----	----	----	----	----	----
PotVar0013850	T	C	CCCC	CCCC	CCCC	CCCC	TCCC	TTCC	CCCC	CCCC	TTCC	TCCC	TCCC	CCCC	TTCC	TCCC	CCCC	CCCC	CCCC	CCCC	TCCC	TCCC	TCCC	CCCC	TCCC	TCCC	TCCC	TCCC	TCCC	TCCC	CCCC	TCCC	CCCC	CCCC	TCCC	CCCC	TCCC	CCCC	CCCC	CCCC	CCCC	CCCC	CCCC	CCCC	CCCC	CCCC	CCCC	TCCC	CCCC
PotVar0013851	T	G	TTGG	TGGG	GGGG	GGGG	TGGG	GGGG	TTGG	TTGG	TTGG	GGGG	TGGG	TGGG	GGGG	TGGG	TGGG	TTGG	TTGG	TTTG	GGGG	TGGG	TGGG	TGGG	TGGG	TGGG	TGGG	TGGG	TGGG	TGGG	TGGG	TGGG	TGGG	TGGG	TGGG	TTTG	TGGG	TTGG	TGGG	TTGG	GGGG	GGGG	TGGG	TTGG	TTGG	TTGG	GGGG	TGGG	TTTG
PotVar0013853	A	G	----	----	----	----	----	----	----	----	----	----	----	----	----	----	----	----	----	----	----	----	----	----	----	----	----	----	----	----	----	----	----	----	----	----	----	----	----	----	----	----	----	----	----	----	----	----	----
PotVar0013854	A	G	----	----	----	----	----	----	----	----	----	----	----	----	----	----	----	----	----	----	----	----	----	----	----	----	----	----	----	----	----	----	----	----	----	----	----	----	----	----	----	----	----	----	----	----	----	----	----
PotVar0013856	A	G	GGGG	GGGG	GGGG	GGGG	GGGG	GGGG	GGGG	GGGG	GGGG	GGGG	GGGG	GGGG	GGGG	GGGG	GGGG	GGGG	GGGG	GGGG	GGGG	GGGG	GGGG	----	AGGG	GGGG	GGGG	GGGG	GGGG	GGGG	GGGG	GGGG	GGGG	GGGG	AGGG	GGGG	GGGG	GGGG	GGGG	GGGG	GGGG	GGGG	GGGG	GGGG	GGGG	GGGG	GGGG	GGGG	GGGG
PotVar0013866	A	G	GGGG	AGGG	GGGG	GGGG	GGGG	GGGG	AGGG	GGGG	AGGG	GGGG	AGGG	AGGG	GGGG	GGGG	AGGG	GGGG	GGGG	AGGG	GGGG	AGGG	AGGG	GGGG	AGGG	GGGG	GGGG	GGGG	GGGG	GGGG	AGGG	GGGG	GGGG	AGGG	AGGG	AGGG	GGGG	GGGG	GGGG	AGGG	GGGG	GGGG	GGGG	AAGG	AGGG	AGGG	GGGG	GGGG	AAGG
PotVar0013867	T	C	CCCC	TTCC	CCCC	CCCC	TCCC	TTCC	TCCC	CCCC	TTTC	TCCC	TTCC	TCCC	TTTC	TCCC	TCCC	CCCC	TCCC	TCCC	TCCC	TTCC	TTCC	----	TTCC	TCCC	TTCC	TTCC	TCCC	TCCC	TTCC	TCCC	CCCC	TCCC	TTCC	TCCC	TCCC	CCCC	CCCC	TCCC	CCCC	TCCC	CCCC	TTCC	TTCC	TCCC	CCCC	TTCC	TTCC
PotVar0013870	A	G	AGGG	AAAG	AGGG	AAAG	AGGG	AGGG	AGGG	AGGG	GGGG	AAGG	AAGG	AAGG	GGGG	GGGG	AAGG	AGGG	AGGG	AGGG	AGGG	AGGG	AGGG	AAGG	AGGG	AGGG	AGGG	AGGG	AGGG	AGGG	AAGG	GGGG	AGGG	AGGG	AGGG	AGGG	AAGG	GGGG	AGGG	AAGG	AGGG	AAAG	AGGG	AGGG	GGGG	AAGG	AGGG	AAGG	GGGG
PotVar0013873	A	G	AGGG	AAAA	GGGG	AAAG	AAGG	AAAG	AAGG	GGGG	AAAG	AAAG	AAAA	AGGG	AAAG	AGGG	AAAG	AGGG	AGGG	AGGG	AAGG	AAGG	AAAG	AAGG	AAAG	AAGG	AAAG	AAAG	AAGG	AAGG	AAAG	AGGG	AGGG	AAGG	AAAG	AAGG	AAAG	GGGG	AGGG	AAAG	AGGG	AAAA	AGGG	AAAG	AAGG	AAAG	AGGG	AAAG	AAAG
PotVar0013876	A	C	----	----	----	----	----	----	----	----	----	----	----	----	----	----	----	----	----	----	----	----	----	----	----	----	----	----	----	----	----	----	----	----	----	----	----	----	----	----	----	----	----	----	----	----	----	----	----
PotVar0013895	A	G	----	----	----	----	----	----	----	----	----	----	----	----	----	----	----	----	----	----	----	----	----	----	----	----	----	----	----	----	----	----	----	----	----	----	----	----	----	----	----	----	----	----	----	----	----	----	----
PotVar0013901	A	G	----	----	----	----	----	----	----	----	----	----	----	----	----	----	----	----	----	----	----	----	----	----	----	----	----	----	----	----	----	----	----	----	----	----	----	----	----	----	----	----	----	----	----	----	----	----	----
PotVar0013907	T	C	TTCC	CCCC	CCCC	CCCC	TCCC	CCCC	TCCC	CCCC	TCCC	CCCC	CCCC	CCCC	CCCC	TCCC	CCCC	TTCC	TTCC	TTCC	CCCC	CCCC	CCCC	TCCC	CCCC	TCCC	TCCC	TCCC	TCCC	TCCC	CCCC	TCCC	TCCC	CCCC	CCCC	TTCC	TCCC	TTCC	TCCC	TCCC	CCCC	CCCC	TCCC	CCCC	TCCC	TCCC	CCCC	TCCC	CCCC
PotVar0013943	T	G	TTTT	TTTT	TTTT	TTTT	TTTT	TTTT	TTTT	TTTT	TTTT	TTTT	TTTT	TTTT	TTTT	TTTT	TTTT	TTTT	TTTT	TTTT	TTTT	TTTT	TTTT	TTTT	TTTT	TTTT	TTTT	TTTT	TTTT	TTTT	TTTT	TTTT	TTTT	TTTT	TTTT	TTTT	TTTT	TTTT	TTTT	TTTT	TTTT	TTTT	TTTT	TTTT	TTTT	TTTT	TTTT	TTTT	TTTG
PotVar0013954	A	G	----	----	----	----	----	----	----	----	----	----	----	----	----	----	----	----	----	----	----	----	----	----	----	----	----	----	----	----	----	----	----	----	----	----	----	----	----	----	----	----	----	----	----	----	----	----	----
PotVar0013984	A	G	GGGG	GGGG	GGGG	GGGG	GGGG	GGGG	GGGG	GGGG	GGGG	GGGG	GGGG	GGGG	GGGG	GGGG	GGGG	GGGG	GGGG	GGGG	GGGG	GGGG	GGGG	AGGG	AAGG	GGGG	GGGG	GGGG	GGGG	GGGG	GGGG	GGGG	GGGG	GGGG	AAGG	GGGG	GGGG	GGGG	GGGG	GGGG	GGGG	GGGG	GGGG	GGGG	GGGG	GGGG	GGGG	GGGG	GGGG
PotVar0013985	A	G	----	----	----	----	----	----	----	----	----	----	----	----	----	----	----	----	----	----	----	----	----	----	----	----	----	----	----	----	----	----	----	----	----	----	----	----	----	----	----	----	----	----	----	----	----	----	----
PotVar0013997	A	G	GGGG	GGGG	GGGG	GGGG	GGGG	GGGG	GGGG	GGGG	GGGG	GGGG	GGGG	GGGG	GGGG	GGGG	GGGG	GGGG	GGGG	GGGG	GGGG	GGGG	GGGG	GGGG	GGGG	GGGG	GGGG	GGGG	GGGG	GGGG	AGGG	GGGG	GGGG	GGGG	GGGG	GGGG	GGGG	GGGG	GGGG	GGGG	GGGG	GGGG	GGGG	GGGG	AGGG	GGGG	GGGG	GGGG	GGGG
PotVar0014009	A	G	GGGG	GGGG	GGGG	GGGG	GGGG	GGGG	GGGG	GGGG	GGGG	GGGG	GGGG	GGGG	GGGG	GGGG	GGGG	GGGG	GGGG	AGGG	GGGG	GGGG	GGGG	GGGG	GGGG	GGGG	GGGG	GGGG	GGGG	GGGG	GGGG	GGGG	GGGG	GGGG	GGGG	GGGG	GGGG	GGGG	GGGG	GGGG	GGGG	GGGG	GGGG	GGGG	GGGG	GGGG	GGGG	GGGG	AGGG
PotVar0014011	T	C	----	----	----	----	----	----	----	----	----	----	----	----	----	----	----	----	----	----	----	----	----	----	----	----	----	----	----	----	----	----	----	----	----	----	----	----	----	----	----	----	----	----	----	----	----	----	----
PotVar0014012	T	C	TTTC	CCCC	TTTC	TCCC	TCCC	TCCC	TTCC	TCCC	TCCC	TCCC	CCCC	TCCC	TTTC	TTTC	TCCC	TTTC	TTTC	TTCC	TTTC	TCCC	TCCC	TCCC	CCCC	TTCC	TCCC	TCCC	TTCC	TTCC	TCCC	TTTC	TTTC	TTCC	CCCC	TTCC	TCCC	TTTT	TTTC	TCCC	TTTC	CCCC	TTTC	TCCC	TTCC	TCCC	TTTC	TCCC	TTCC
PotVar0014016	T	C	----	----	----	----	----	----	----	----	----	----	----	----	----	----	----	----	----	----	----	----	----	----	----	----	----	----	----	----	----	----	----	----	----	----	----	----	----	----	----	----	----	----	----	----	----	----	----
PotVar0014017	T	C	----	----	----	----	----	----	----	----	----	----	----	----	----	----	----	----	----	----	----	----	----	----	----	----	----	----	----	----	----	----	----	----	----	----	----	----	----	----	----	----	----	----	----	----	----	----	----
PotVar0014025	A	G	GGGG	AAGG	AGGG	GGGG	AAGG	AAGG	GGGG	AAGG	AAGG	AGGG	AGGG	AGGG	AGGG	AGGG	GGGG	GGGG	AGGG	AGGG	GGGG	AAGG	AGGG	GGGG	AGGG	AGGG	AAGG	AAGG	GGGG	AGGG	AGGG	AGGG	GGGG	GGGG	AGGG	GGGG	AGGG	GGGG	GGGG	GGGG	GGGG	AGGG	GGGG	AGGG	GGGG	AGGG	GGGG	AGGG	GGGG
PotVar0014054	A	G	----	----	----	----	----	----	----	----	----	----	----	----	----	----	----	----	----	----	----	----	----	----	----	----	----	----	----	----	----	----	----	----	----	----	----	----	----	----	----	----	----	----	----	----	----	----	----
PotVar0014056	T	C	CCCC	TCCC	CCCC	CCCC	CCCC	CCCC	CCCC	CCCC	CCCC	CCCC	CCCC	CCCC	CCCC	CCCC	CCCC	CCCC	TCCC	CCCC	CCCC	CCCC	CCCC	CCCC	CCCC	CCCC	CCCC	CCCC	CCCC	CCCC	CCCC	CCCC	CCCC	CCCC	CCCC	CCCC	CCCC	CCCC	CCCC	CCCC	CCCC	CCCC	CCCC	CCCC	CCCC	CCCC	CCCC	CCCC	CCCC
PotVar0014057	T	C	TTTT	TTTT	TTTT	TTTT	TTTT	TTTT	TTTT	TTTT	TTTT	TTTT	TTTT	TTTT	TTTT	TTTT	TTTT	TTTT	TTTT	TTTT	TTTT	TTTT	TTTT	TTTT	TTTT	TTTT	TTTT	TTTT	TTTT	TTTT	TTTT	TTTT	TTTT	TTTT	TTTT	TTTT	TTTT	TTTT	TTTT	TTTT	TTTT	TTTT	TTTT	TTTT	TTTT	TTTT	TTTT	TTTT	TTTC
PotVar0014064	A	G	AAAG	AAAA	GGGG	AAAG	AAAG	AAAG	AAGG	AAGG	AAAG	AAAG	AAAA	AAGG	AGGG	AGGG	AAAG	AAAG	AAGG	AGGG	AGGG	AAGG	AAAG	AAAG	AAAG	AAGG	AAAA	AAAA	AAAG	AAGG	AAAG	AAGG	AAGG	AAGG	AAAG	AAAG	AAAA	AAGG	AAGG	AAAG	AGGG	AAAA	AGGG	AAAG	AAGG	AAAG	AGGG	AAAA	AGGG
PotVar0014066	A	G	GGGG	GGGG	GGGG	GGGG	GGGG	GGGG	GGGG	AGGG	GGGG	GGGG	GGGG	GGGG	GGGG	GGGG	GGGG	GGGG	GGGG	GGGG	GGGG	GGGG	GGGG	GGGG	GGGG	GGGG	GGGG	GGGG	GGGG	GGGG	GGGG	GGGG	GGGG	GGGG	GGGG	GGGG	GGGG	GGGG	GGGG	GGGG	GGGG	GGGG	GGGG	GGGG	GGGG	GGGG	GGGG	GGGG	GGGG
PotVar0014072	A	G	AAGG	AAGG	AAAA	AAGG	AAAG	AAAG	AAAG	AAAA	AAAG	AAGG	AGGG	AAAG	AAAG	AAAG	AAGG	AAAG	AAAG	AAAA	AAAG	AAAG	AAAA	AAAG	AAAA	AAAA	AAAG	AAAG	AAAG	AAAG	AAGG	AAAA	AAGG	AAAA	AAAA	AAAG	AGGG	AAGG	AAAG	AAAG	AAAG	AAGG	AAAG	AAAA	AAGG	AAGG	AAAG	AAGG	AAAA
PotVar0014074	T	C	----	----	----	----	----	----	----	----	----	----	----	----	----	----	----	----	----	----	----	----	----	----	----	----	----	----	----	----	----	----	----	----	----	----	----	----	----	----	----	----	----	----	----	----	----	----	----
PotVar0014076	A	G	GGGG	GGGG	GGGG	GGGG	GGGG	GGGG	GGGG	GGGG	GGGG	GGGG	GGGG	GGGG	GGGG	GGGG	GGGG	GGGG	GGGG	GGGG	GGGG	GGGG	GGGG	AGGG	AAGG	GGGG	GGGG	GGGG	GGGG	GGGG	GGGG	GGGG	GGGG	GGGG	AAGG	GGGG	GGGG	GGGG	GGGG	GGGG	GGGG	GGGG	GGGG	GGGG	GGGG	GGGG	GGGG	GGGG	GGGG
PotVar0014077	A	G	----	----	----	----	----	----	----	----	----	----	----	----	----	----	----	----	----	----	----	----	----	----	----	----	----	----	----	----	----	----	----	----	----	----	----	----	----	----	----	----	----	----	----	----	----	----	----
PotVar0014087	A	G	AAAA	AAAA	AAAA	AAAA	AAAA	AAAA	AAAA	AAAA	AAAA	AAAA	AAAA	AAAA	AAAA	AAAA	AAAA	AAAA	AAAA	AAAA	AAAA	AAAA	AAAA	AAAA	AAAA	AAAA	AAAA	AAAA	AAAA	AAAA	AAAA	AAAA	AAAA	AAAA	AAAA	AAAA	AAAA	AAAA	AAAA	AAAA	AAAA	AAAA	AAAA	AAAA	AAAA	AAAA	AAAA	AAAA	AAAA
PotVar0014090	T	C	----	----	----	----	----	----	----	----	----	----	----	----	----	----	----	----	----	----	----	----	----	----	----	----	----	----	----	----	----	----	----	----	----	----	----	----	----	----	----	----	----	----	----	----	----	----	----
PotVar0014097	T	G	TGGG	TTTG	TTTT	TTGG	TTTG	TTGG	TTGG	TTGG	TTGG	TGGG	TGGG	TTGG	TTTG	TTTG	TTTT	TTTT	TTGG	TGGG	TTTG	TTGG	TTTT	TTTG	TTTT	TGGG	TTGG	TTGG	TTTG	TTTG	TTTG	TTTT	TTGG	TTTG	TTTT	TTGG	----	TTGG	TGGG	TTGG	TTGG	TTGG	TTGG	TTTT	TGGG	TTGG	TTTG	TTGG	TTTG
PotVar0014105	T	C	----	----	----	----	----	----	----	----	----	----	----	----	----	----	----	----	----	----	----	----	----	----	----	----	----	----	----	----	----	----	----	----	----	----	----	----	----	----	----	----	----	----	----	----	----	----	----
PotVar0014106	A	G	AGGG	AAAG	AAAG	AGGG	AAAG	AAGG	AAGG	AAAG	AGGG	AGGG	AGGG	AGGG	AAAG	AAAG	AAAG	AAAG	AAGG	AGGG	AAAG	AAAG	AAAG	AGGG	AAGG	AAGG	AAGG	AAGG	AAAG	AAGG	AAGG	AAAA	AAGG	AAAG	AAGG	AGGG	AGGG	AAGG	AGGG	AAGG	AAGG	AAGG	AAGG	AAAG	AGGG	AAGG	AAAG	AGGG	AAGG
PotVar0014107	A	C	----	----	----	----	----	----	----	----	----	----	----	----	----	----	----	----	----	----	----	----	----	----	----	----	----	----	----	----	----	----	----	----	----	----	----	----	----	----	----	----	----	----	----	----	----	----	----
PotVar0014120	A	G	AAAA	AAAA	AAAA	AAAG	AAAA	AAAA	AAAA	AAAA	AAAG	AAAA	AAAA	AAAG	AAAA	AAAA	AAAG	AAAG	AAAA	AAAA	AAAA	AAAA	AAAG	----	AAGG	AAAA	AAAA	AAAA	AAAA	AAAG	AAAG	AAAA	AAAA	AAAA	AAGG	AAAG	AAAA	AAAA	AAAA	AAAA	AAAA	AAAA	AAAA	AAAG	AAAA	AAAA	AAAA	AAAG	AAAG
PotVar0014151	T	C	TTTC	TTTC	TCCC	TTTC	TCCC	TTCC	TTCC	TTTC	TTCC	TTTC	TTTC	TTTC	TCCC	TCCC	TCCC	CCCC	TTTC	TTCC	TCCC	TTCC	TCCC	TTTC	TTCC	TTTC	TTCC	TTCC	TCCC	TTCC	TTCC	TCCC	TTCC	TTCC	TTCC	TTTC	TTCC	TTTC	TTTC	TCCC	TTCC	TTTC	TTCC	TTCC	TCCC	TTCC	TCCC	TTCC	TTCC
PotVar0014166	A	G	GGGG	GGGG	GGGG	GGGG	GGGG	GGGG	GGGG	GGGG	GGGG	GGGG	GGGG	GGGG	GGGG	GGGG	GGGG	GGGG	GGGG	GGGG	GGGG	GGGG	GGGG	GGGG	GGGG	GGGG	GGGG	GGGG	GGGG	GGGG	GGGG	GGGG	GGGG	GGGG	GGGG	GGGG	GGGG	GGGG	GGGG	GGGG	GGGG	GGGG	GGGG	GGGG	GGGG	GGGG	GGGG	GGGG	AGGG
PotVar0014192	T	C	----	----	----	----	----	----	----	----	----	----	----	----	----	----	----	----	----	----	----	----	----	----	----	----	----	----	----	----	----	----	----	----	----	----	----	----	----	----	----	----	----	----	----	----	----	----	----
PotVar0014196	A	G	----	----	----	----	----	----	----	----	----	----	----	----	----	----	----	----	----	----	----	----	----	----	----	----	----	----	----	----	----	----	----	----	----	----	----	----	----	----	----	----	----	----	----	----	----	----	----
PotVar0014208	A	G	AAAA	AAAA	AAAA	AAAA	AAAA	AAAA	AAAA	AAAA	AAAA	AAAA	AAAA	AAAA	AAAA	AAAA	AAAA	AAAA	AAAA	AAAA	AAAA	AAAA	AAAA	AAAA	AAAA	AAAA	AAAA	AAAA	AAAA	AAAA	AAAA	AAAA	AAAA	AAAA	AAAA	AAAA	AAAA	AAAA	AAAA	AAAA	AAAA	AAAA	AAAA	AAAA	AAAA	AAAA	AAAA	AAAA	AAAG
PotVar0014217	A	G	AGGG	AGGG	AAAA	AAAG	AAAG	AAGG	AAGG	AAGG	AAAG	AGGG	AGGG	AAAG	AAAA	AAAG	AAAA	AAAA	AGGG	AAGG	AAAG	AAGG	AAAA	AAAG	AAAA	AGGG	AAGG	AAGG	AAAG	AAAG	AAAG	AAAG	AAGG	AAGG	AAAA	AAGG	AAAG	AGGG	AGGG	AAAG	AAGG	AAGG	AAGG	AAAG	AAAG	AAAG	AAAG	AAAG	AAAG
PotVar0014240	T	C	CCCC	CCCC	CCCC	CCCC	CCCC	CCCC	CCCC	CCCC	CCCC	CCCC	CCCC	CCCC	CCCC	CCCC	CCCC	CCCC	TCCC	TCCC	CCCC	CCCC	CCCC	CCCC	CCCC	CCCC	CCCC	CCCC	CCCC	CCCC	CCCC	CCCC	TCCC	CCCC	CCCC	CCCC	CCCC	CCCC	CCCC	CCCC	CCCC	TCCC	CCCC	CCCC	CCCC	CCCC	CCCC	CCCC	CCCC
PotVar0014299	T	C	TTTC	TTTC	TTTC	TTTC	TTTT	TTCC	TTTC	TTTC	TTCC	TTTC	TTTC	TTTC	TTTT	TTTC	TTTT	TTTT	TTTC	TCCC	TTTC	TTTC	TTCC	TTCC	TTTC	TTTT	TTCC	TTCC	TTTC	TTCC	TTTT	----	TTTC	TTTC	TTTC	TTCC	TTTC	TTTT	TTTT	TTCC	TTTC	TTTC	TTCC	TTCC	TTTC	TTTT	TCCC	TTTC	TTTC
PotVar0014314	T	C	----	----	----	----	----	----	----	----	----	----	----	----	----	----	----	----	----	----	----	----	----	----	----	----	----	----	----	----	----	----	----	----	----	----	----	----	----	----	----	----	----	----	----	----	----	----	----
PotVar0014328	A	G	GGGG	GGGG	GGGG	GGGG	GGGG	GGGG	GGGG	GGGG	GGGG	GGGG	GGGG	GGGG	GGGG	GGGG	GGGG	GGGG	GGGG	GGGG	GGGG	GGGG	GGGG	GGGG	GGGG	GGGG	GGGG	GGGG	GGGG	GGGG	GGGG	GGGG	AGGG	GGGG	GGGG	GGGG	GGGG	GGGG	GGGG	GGGG	GGGG	GGGG	GGGG	GGGG	GGGG	GGGG	GGGG	AGGG	GGGG
PotVar0014349	T	C	TTTT	TTTT	TTTC	TTTT	TTCC	TTTT	TTTT	TTTC	TTTC	TTTT	TTTT	TTTC	TTCC	TTCC	TTCC	TTTT	TTTC	----	TTTT	TTTC	TTTT	TTTC	TTTC	TTTC	TTTT	TTTT	TTTT	TTTT	TTTC	TTTC	TTTC	TTTT	TTTC	TTTC	TTTT	TTTC	TTTT	TTTT	TTTC	TTCC	TTTT	TTTT	TTTT	TTTT	TTTC	TTTC	TTTC
PotVar0014354	T	C	CCCC	CCCC	TCCC	CCCC	TTCC	CCCC	CCCC	TCCC	TCCC	CCCC	CCCC	TCCC	TCCC	TTCC	TTCC	CCCC	TCCC	TCCC	CCCC	TCCC	CCCC	TCCC	TCCC	TCCC	CCCC	CCCC	CCCC	CCCC	TCCC	TCCC	TCCC	CCCC	TCCC	TCCC	CCCC	TCCC	CCCC	CCCC	TCCC	TTCC	CCCC	CCCC	CCCC	CCCC	TCCC	TCCC	TCCC
PotVar0014357	T	C	TTCC	TTTC	TTCC	TTCC	TCCC	TTTC	TTTT	TTTC	TTCC	TTCC	TTTT	TTTC	TTCC	TCCC	TCCC	TTCC	TCCC	TTTC	TTTC	TTCC	TTCC	TTTC	TTCC	TTCC	TTTC	TTTC	TTCC	TTTC	TTCC	TTTC	TCCC	TTTC	TTCC	TTTC	TTTC	TTCC	TTCC	TTTC	TTTC	TTCC	TTTC	TTCC	TCCC	TTCC	TTTC	TCCC	TTCC
PotVar0014358	A	C	----	----	----	----	----	----	----	----	----	----	----	----	----	----	----	----	----	----	----	----	----	----	----	----	----	----	----	----	----	----	----	----	----	----	----	----	----	----	----	----	----	----	----	----	----	----	----
PotVar0014375	T	C	CCCC	CCCC	CCCC	CCCC	CCCC	CCCC	CCCC	CCCC	CCCC	CCCC	CCCC	TCCC	CCCC	CCCC	CCCC	CCCC	CCCC	CCCC	CCCC	CCCC	CCCC	TCCC	CCCC	CCCC	CCCC	CCCC	CCCC	TCCC	CCCC	CCCC	CCCC	CCCC	CCCC	TCCC	TTCC	CCCC	TTCC	CCCC	CCCC	CCCC	CCCC	CCCC	CCCC	TCCC	CCCC	CCCC	CCCC
PotVar0014376	T	C	CCCC	CCCC	TCCC	CCCC	TTCC	TCCC	CCCC	TCCC	TCCC	CCCC	CCCC	TCCC	TTCC	TTCC	TTCC	TCCC	TCCC	TCCC	CCCC	TCCC	CCCC	TCCC	TCCC	TCCC	CCCC	CCCC	CCCC	----	TTCC	TCCC	TCCC	TCCC	TCCC	TCCC	CCCC	TCCC	CCCC	CCCC	TCCC	TTCC	CCCC	CCCC	TCCC	TCCC	TCCC	TCCC	CCCC
PotVar0014379	A	C	ACCC	----	ACCC	ACCC	CCCC	AACC	----	ACCC	AACC	ACCC	ACCC	ACCC	CCCC	ACCC	CCCC	CCCC	ACCC	AAAC	ACCC	ACCC	AACC	AACC	ACCC	CCCC	AACC	AACC	ACCC	AACC	CCCC	ACCC	ACCC	ACCC	ACCC	AACC	ACCC	CCCC	CCCC	AACC	ACCC	ACCC	AACC	AACC	ACCC	CCCC	AAAC	ACCC	ACCC
PotVar0014380	A	G	AAGG	AAAG	AAGG	AAGG	AAAA	GGGG	GGGG	AAGG	AAGG	AAGG	GGGG	----	AAGG	AAAG	AAAG	AAGG	AAAG	AGGG	AGGG	AAGG	AAGG	AAGG	AAGG	AAGG	AGGG	AGGG	AAGG	AAGG	AAGG	AGGG	AAAG	AGGG	AAGG	AAGG	AAAG	AAGG	AAAA	AGGG	AAGG	AAGG	AGGG	AAGG	AAAG	AAAG	AGGG	AAAG	AAGG
PotVar0014381	A	C	AACC	AAAC	AAAC	AAAC	AAAC	AAAA	AAAA	AAAA	AAAC	AACC	AAAA	AAAA	AAAA	AAAC	AAAC	AACC	AACC	AAAA	AAAC	AAAA	AACC	AAAA	AAAA	AAAC	AAAC	AAAC	AACC	AAAC	AAAC	AAAA	AAAC	AAAC	AAAA	AAAA	AAAA	AAAC	AAAC	AAAC	AAAA	AAAA	AAAC	AACC	AACC	AAAC	AAAA	AAAC	AACC
PotVar0014384	A	G	GGGG	AGGG	GGGG	GGGG	AGGG	GGGG	GGGG	AGGG	GGGG	GGGG	GGGG	GGGG	GGGG	GGGG	GGGG	GGGG	GGGG	GGGG	GGGG	GGGG	GGGG	GGGG	GGGG	GGGG	GGGG	GGGG	GGGG	GGGG	GGGG	GGGG	GGGG	GGGG	GGGG	GGGG	GGGG	GGGG	GGGG	GGGG	AGGG	GGGG	GGGG	GGGG	GGGG	GGGG	GGGG	GGGG	GGGG
PotVar0014413	T	G	----	----	----	----	----	----	----	----	----	----	----	----	----	----	----	----	----	----	----	----	----	----	----	----	----	----	----	----	----	----	----	----	----	----	----	----	----	----	----	----	----	----	----	----	----	----	----
PotVar0014440	T	C	TTCC	TCCC	TTCC	TTCC	CCCC	TTCC	TTTT	TTCC	TTTC	TCCC	TTTC	TTCC	TTCC	TCCC	TCCC	TTCC	TCCC	TTTC	TTTC	TTCC	TTCC	TTTC	TTCC	TTCC	TTTC	TTTC	TTCC	TTTC	TTCC	TTTC	TCCC	TTTC	TTCC	TTTC	TTTC	TTCC	TTCC	TTTC	TTCC	TTCC	TTTC	TCCC	TCCC	TTCC	TTTC	----	TTCC
PotVar0014471	T	C	----	----	----	----	----	----	----	----	----	----	----	----	----	----	----	----	----	----	----	----	----	----	----	----	----	----	----	----	----	----	----	----	----	----	----	----	----	----	----	----	----	----	----	----	----	----	----
PotVar0014475	A	G	GGGG	GGGG	GGGG	GGGG	GGGG	GGGG	GGGG	GGGG	GGGG	GGGG	GGGG	GGGG	GGGG	GGGG	GGGG	GGGG	GGGG	GGGG	GGGG	GGGG	GGGG	GGGG	AGGG	GGGG	GGGG	GGGG	GGGG	GGGG	GGGG	GGGG	GGGG	GGGG	AGGG	GGGG	GGGG	GGGG	GGGG	GGGG	GGGG	GGGG	GGGG	GGGG	GGGG	GGGG	GGGG	GGGG	GGGG
PotVar0014477	T	G	GGGG	TGGG	GGGG	GGGG	TGGG	GGGG	GGGG	TGGG	GGGG	GGGG	GGGG	GGGG	GGGG	GGGG	GGGG	GGGG	GGGG	GGGG	GGGG	GGGG	GGGG	GGGG	GGGG	GGGG	GGGG	GGGG	GGGG	GGGG	GGGG	GGGG	GGGG	GGGG	GGGG	GGGG	GGGG	GGGG	GGGG	GGGG	GGGG	GGGG	GGGG	GGGG	GGGG	GGGG	GGGG	GGGG	GGGG
PotVar0014494	A	G	AAGG	AAAG	AAGG	AAGG	AAAA	AAGG	AGGG	AAGG	AGGG	AAGG	AGGG	AAGG	AAGG	AAAG	AAAG	AAAG	AAAG	AAGG	AGGG	AAGG	AAGG	AGGG	AAGG	AAGG	AGGG	AGGG	AAGG	AGGG	AAAG	AAGG	AAAG	AAGG	AAGG	AGGG	AGGG	AAGG	AAGG	AGGG	AAGG	AAGG	AGGG	AAAG	AAAG	AAAG	AAGG	AAAG	AAGG
PotVar0014496	T	C	CCCC	TCCC	CCCC	CCCC	TCCC	CCCC	CCCC	TCCC	CCCC	CCCC	CCCC	CCCC	CCCC	CCCC	CCCC	CCCC	CCCC	CCCC	CCCC	CCCC	CCCC	CCCC	CCCC	CCCC	CCCC	CCCC	CCCC	CCCC	CCCC	CCCC	CCCC	CCCC	CCCC	CCCC	CCCC	CCCC	CCCC	CCCC	CCCC	CCCC	CCCC	CCCC	CCCC	CCCC	CCCC	CCCC	CCCC
PotVar0014498	A	G	GGGG	GGGG	AGGG	GGGG	AAGG	GGGG	GGGG	AGGG	AGGG	GGGG	AGGG	AGGG	AGGG	AAGG	AAGG	GGGG	AGGG	AGGG	GGGG	AGGG	GGGG	AGGG	AGGG	GGGG	GGGG	GGGG	GGGG	GGGG	AGGG	AGGG	AGGG	GGGG	AGGG	AGGG	GGGG	AGGG	GGGG	GGGG	AAGG	AAGG	GGGG	AGGG	GGGG	GGGG	AGGG	AGGG	GGGG
PotVar0014499	A	G	AAAA	AAAA	AAAA	AAAA	AAAA	AAAG	AAAA	AAAA	AAAA	AAAA	AAAA	AAAA	AAAA	AAAA	AAAA	AAAA	AAAA	AAAA	AAAA	AAAA	AAAA	AAAA	AAAA	AAAA	AAAA	AAAA	AAAA	AAAA	AAAA	AAAA	AAAA	AAAA	AAAA	AAAA	AAAA	AAAA	AAAA	AAAA	AAAA	AAAA	AAAA	AAAA	AAAA	AAAA	AAAA	AAAA	AAAA
PotVar0014509	A	C	AACC	ACCC	ACCC	ACCC	ACCC	ACCC	CCCC	CCCC	CCCC	AACC	CCCC	CCCC	CCCC	ACCC	ACCC	AACC	AACC	CCCC	ACCC	CCCC	AACC	----	CCCC	AACC	ACCC	ACCC	AACC	ACCC	ACCC	CCCC	ACCC	ACCC	CCCC	CCCC	CCCC	ACCC	ACCC	ACCC	CCCC	CCCC	ACCC	AACC	AACC	ACCC	CCCC	ACCC	AACC
PotVar0014510	A	G	AAGG	AAAG	AAGG	AAGG	AGGG	AAGG	AAAA	AAAG	AAAG	AAGG	AAAG	AAAG	AAGG	AGGG	AGGG	AAGG	AGGG	AAAG	AAAG	AAGG	AAGG	AAAG	AAGG	AAGG	AAAG	AAAG	AAGG	AAAG	AAGG	AAAG	AAGG	AAAG	AAGG	AAAG	AAAG	AAGG	AAGG	AAAG	AAGG	AAGG	AAAG	AGGG	AGGG	AAGG	AAAG	AAGG	AAGG
PotVar0014522	T	C	TTTT	TTTC	TTTT	TTTT	TTTT	TTTT	TTTC	TTTT	TTTT	TTTT	TTTT	TTTT	TTTT	TTTT	TTTT	TTTT	TTTT	TTTC	TTTT	TTTT	TTTT	TTTT	TTTT	TTTT	TTTT	TTTT	TTTT	TTTT	TTTT	TTTC	TTTC	TTTT	TTTT	TTTT	TTTT	TTTT	TTTT	TTTT	TTTT	TTTT	TTTT	TTTT	TTTT	TTTT	TTTC	TTTC	TTTT
PotVar0014530	A	G	----	----	----	----	----	----	----	----	----	----	----	----	----	----	----	----	----	----	----	----	----	----	----	----	----	----	----	----	----	----	----	----	----	----	----	----	----	----	----	----	----	----	----	----	----	----	----
PotVar0014546	T	G	TTTT	TTTT	TTTT	TTTT	TTTT	TTTT	TTGG	TTTG	TTTT	TTTT	TTTT	TTTT	TTTT	TTTT	TTTT	TTTT	TTTT	TTTT	TTTT	TTTT	TTTT	TTTT	TTTT	TTTT	TTTT	TTTT	TTTT	TTTT	TTTT	TTTT	TTTT	TTTT	TTTT	TTTT	TTTT	TTTT	TTTT	TTTT	TTTT	TTTT	TTTG	TTTT	TTTT	TTTT	TTTT	TTTT	TTTT
PotVar0014550	A	G	----	----	----	----	----	----	----	----	----	----	----	----	----	----	----	----	----	----	----	----	----	----	----	----	----	----	----	----	----	----	----	----	----	----	----	----	----	----	----	----	----	----	----	----	----	----	----
PotVar0014552	A	G	AAAG	AAAG	AAAG	AAAG	AGGG	AGGG	AAAA	AAAG	AAAA	GGGG	AAAG	AAAA	AAAA	AAGG	AAAA	AAGG	AGGG	AAAG	AAAG	AAAA	AAGG	AAAA	AAAG	AAGG	AAGG	AAGG	AAAG	AAAA	AAAG	AAAA	AAAG	AAAG	AAAG	AAAG	AAAA	AAGG	AAAG	AAAG	AAAA	AAAA	AAAA	AAGG	AAGG	AAAG	AAGG	AAAG	AAGG
PotVar0014553	T	G	TTTG	TTGG	TTTG	TTGG	TGGG	TGGG	TGGG	TTGG	TTTT	GGGG	TTTG	TTTG	TTTG	TTGG	TTTT	TTGG	TGGG	TTGG	TTTG	TTTG	TTGG	----	TTTG	TTGG	TTGG	TTGG	TTTG	TTTT	TTTG	TTTG	TTGG	TTTG	TTTG	TTTG	TTTT	TTGG	TTGG	TTTG	TTTT	TTTT	TTTG	TTGG	TGGG	TTGG	TGGG	TTGG	TTGG
PotVar0014558	A	C	CCCC	ACCC	CCCC	CCCC	CCCC	CCCC	ACCC	CCCC	CCCC	CCCC	CCCC	CCCC	CCCC	CCCC	CCCC	CCCC	CCCC	ACCC	CCCC	CCCC	CCCC	CCCC	CCCC	CCCC	CCCC	CCCC	CCCC	CCCC	CCCC	ACCC	ACCC	CCCC	CCCC	CCCC	CCCC	CCCC	CCCC	CCCC	CCCC	CCCC	CCCC	CCCC	CCCC	CCCC	ACCC	ACCC	CCCC
PotVar0014564	A	G	AAAG	AAGG	AAAG	AAAA	AAAG	AAAA	AAGG	AAAG	AAAA	AAAA	AAAA	AAAG	AAAG	AAAA	AAAG	AAAA	AAAA	AAAG	AAAG	AAAG	AAAA	AAAA	AAAG	AAAA	AAAA	AAAA	AAAA	AAAA	AAAG	AAGG	AAAG	AAAA	AAAG	AAAA	AAAA	AAAG	AAAA	AAAG	AAGG	AAAG	AAAA	AAAA	AAAA	AAAA	AAAG	AAAG	AAAG
PotVar0014571	T	C	TCCC	TCCC	TCCC	TTCC	CCCC	TCCC	CCCC	TCCC	TTTC	CCCC	TTCC	TTCC	TCCC	TCCC	TTCC	TCCC	TCCC	TTCC	TTCC	TCCC	TTCC	TTTC	TCCC	TCCC	TTCC	TTCC	TTCC	TTTC	CCCC	TCCC	TCCC	TTCC	TCCC	TTCC	TTTC	TCCC	TTCC	TTCC	CCCC	TCCC	TTTC	TCCC	TCCC	TCCC	TCCC	TCCC	TCCC
PotVar0014582	A	G	----	----	----	----	----	----	----	----	----	----	----	----	----	----	----	----	----	----	----	----	----	----	----	----	----	----	----	----	----	----	----	----	----	----	----	----	----	----	----	----	----	----	----	----	----	----	----
PotVar0014585	T	C	TCCC	CCCC	TCCC	TCCC	TTTC	TCCC	TCCC	TCCC	TCCC	CCCC	TCCC	CCCC	TCCC	TCCC	CCCC	TCCC	TTTC	TTCC	TCCC	CCCC	TTCC	TCCC	TCCC	TTCC	CCCC	CCCC	TTCC	TTCC	TCCC	TCCC	TTCC	TCCC	TCCC	TTCC	TCCC	TTTC	TCCC	CCCC	TCCC	TTCC	TTCC	TCCC	TCCC	TCCC	TCCC	TTCC	TTCC
PotVar0014587	T	C	----	----	----	----	----	----	----	----	----	----	----	----	----	----	----	----	----	----	----	----	----	----	----	----	----	----	----	----	----	----	----	----	----	----	----	----	----	----	----	----	----	----	----	----	----	----	----
PotVar0014600	A	G	AGGG	GGGG	AGGG	AGGG	AAAG	AGGG	AGGG	AGGG	AGGG	GGGG	AGGG	GGGG	AGGG	AGGG	GGGG	AGGG	AAAG	AAGG	AGGG	GGGG	AAGG	AGGG	AGGG	AAGG	GGGG	GGGG	AAGG	AGGG	AGGG	AGGG	AAGG	AGGG	AGGG	AAGG	AGGG	AAAG	AGGG	GGGG	GGGG	AAGG	AAGG	AGGG	AGGG	AGGG	AGGG	AAGG	AAGG
PotVar0014644	A	C	----	----	----	----	----	----	----	----	----	----	----	----	----	----	----	----	----	----	----	----	----	----	----	----	----	----	----	----	----	----	----	----	----	----	----	----	----	----	----	----	----	----	----	----	----	----	----
PotVar0014656	T	C	TTTT	TTTT	TTTT	TTTT	TTTT	TTTT	TTTT	TTTC	TTTT	TTTT	TTTT	TTTT	TTTT	TTTT	TTTT	TTTT	TTTT	TTTT	TTTT	TTTC	TTTT	TTTT	TTTT	TTTT	TTTT	TTTT	TTTT	TTTT	TTTT	TTTT	TTTT	TTTT	TTTT	TTTC	TTTT	TTTT	TTTT	TTTC	TTTT	TTTT	TTTT	TTTT	TTTT	TTTT	TTTT	TTTT	TTTT
PotVar0014658	T	C	----	----	----	----	----	----	----	----	----	----	----	----	----	----	----	----	----	----	----	----	----	----	----	----	----	----	----	----	----	----	----	----	----	----	----	----	----	----	----	----	----	----	----	----	----	----	----
PotVar0014681	A	G	GGGG	GGGG	GGGG	GGGG	GGGG	GGGG	GGGG	GGGG	GGGG	GGGG	GGGG	GGGG	GGGG	GGGG	GGGG	GGGG	GGGG	GGGG	GGGG	GGGG	GGGG	GGGG	GGGG	GGGG	GGGG	GGGG	GGGG	GGGG	GGGG	GGGG	GGGG	GGGG	GGGG	GGGG	AGGG	GGGG	GGGG	GGGG	GGGG	GGGG	GGGG	GGGG	GGGG	GGGG	GGGG	GGGG	GGGG
PotVar0014687	A	C	----	----	----	----	----	----	----	----	----	----	----	----	----	----	----	----	----	----	----	----	----	----	----	----	----	----	----	----	----	----	----	----	----	----	----	----	----	----	----	----	----	----	----	----	----	----	----
PotVar0014696	T	C	----	----	----	----	----	----	----	----	----	----	----	----	----	----	----	----	----	----	----	----	----	----	----	----	----	----	----	----	----	----	----	----	----	----	----	----	----	----	----	----	----	----	----	----	----	----	----
PotVar0014735	A	G	----	----	----	----	----	----	----	----	----	----	----	----	----	----	----	----	----	----	----	----	----	----	----	----	----	----	----	----	----	----	----	----	----	----	----	----	----	----	----	----	----	----	----	----	----	----	----
PotVar0014738	T	C	TTTT	TTTT	TTTT	TTCC	TTTC	TTTT	TTTC	TTTC	TTTT	TTTT	TTTT	TTTC	TTTT	TTTC	TTTT	TTTT	TTTT	TTTT	TTTT	TTCC	TTTT	TTCC	TTTC	TTTT	TTCC	TTCC	TTTT	TTTT	TTTC	TTTC	TTTC	TTTT	TTTC	TTCC	TCCC	TTTT	TTCC	TTTT	TTTC	TTTT	TTTT	TTTC	TTTC	TTTC	TTTC	TTTT	TTTT
PotVar0014754	T	G	----	----	----	----	----	----	----	----	----	----	----	----	----	----	----	----	----	----	----	----	----	----	----	----	----	----	----	----	----	----	----	----	----	----	----	----	----	----	----	----	----	----	----	----	----	----	----
PotVar0014756	A	G	AAAA	AAAA	AAAA	AAAA	AAAA	AAAA	AAAA	AAAA	AAAA	AAAA	AAAA	AAAA	AAAA	AAAA	AAAA	AAAA	AAAA	AAAA	AAAA	AAAA	AAAA	AAAA	AAAA	AAAG	AAAA	AAAA	AAAG	AAAA	AAAA	AAAA	AAAA	AAAA	AAAA	AAAA	AAAA	AAAA	AAAA	AAAA	AAAA	AAAA	AAAA	AAAA	AAAA	AAAA	AAAA	AAAA	AAAA
PotVar0014757	T	C	----	----	----	----	----	----	----	----	----	----	----	----	----	----	----	----	----	----	----	----	----	----	----	----	----	----	----	----	----	----	----	----	----	----	----	----	----	----	----	----	----	----	----	----	----	----	----
PotVar0014769	A	G	AAAA	AAAA	AAAA	AAAG	AAAA	AAAA	AAAG	AAAA	AAAA	AAAA	AAAA	AAAA	AAAA	AAAA	AAAA	AAAA	AAAA	AAAA	AAAA	AAAA	AAAA	AAAG	AAAG	AAAA	AAAG	AAAG	AAAA	AAAA	AAAA	AAAA	AAAG	AAAA	AAAG	AAAA	AAAA	AAAA	AAAG	AAAA	AAAA	AAAA	AAAA	AAAG	AAAG	AAAA	AAAA	AAAA	AAAA
PotVar0014770	A	G	GGGG	GGGG	GGGG	AGGG	AGGG	GGGG	GGGG	AGGG	GGGG	GGGG	GGGG	AGGG	GGGG	AGGG	GGGG	GGGG	GGGG	GGGG	GGGG	AAGG	GGGG	AGGG	GGGG	GGGG	AGGG	AGGG	GGGG	GGGG	AGGG	AGGG	GGGG	GGGG	GGGG	AAGG	AGGG	GGGG	AGGG	GGGG	AGGG	AAGG	GGGG	GGGG	GGGG	AGGG	AGGG	GGGG	GGGG
PotVar0014771	T	C	----	----	----	----	----	----	----	----	----	----	----	----	----	----	----	----	----	----	----	----	----	----	----	----	----	----	----	----	----	----	----	----	----	----	----	----	----	----	----	----	----	----	----	----	----	----	----
PotVar0014800	T	G	TTTT	TTTT	TTGG	TTTT	TTTG	TTTG	TTTT	TTTT	TTTG	TTTG	TTTT	TTTT	TTTG	TTTT	TTTT	TTTG	TTTG	TTTT	TTTT	TTTT	TTTT	TTTG	TTTG	TTTT	TTTT	TTTT	TTTT	TTTT	TTTG	TTTT	TTTT	TTTT	TTTG	TTTT	TTTT	TTTT	TTTT	TTTT	TTTT	TTTT	TTTT	TTTT	TTTG	TTTT	TTTT	TTTG	TTTT
PotVar0014820	T	C	CCCC	CCCC	CCCC	TCCC	CCCC	CCCC	TCCC	CCCC	CCCC	CCCC	CCCC	CCCC	CCCC	CCCC	CCCC	CCCC	CCCC	CCCC	CCCC	CCCC	CCCC	TCCC	TCCC	CCCC	TCCC	TCCC	CCCC	CCCC	CCCC	CCCC	TCCC	CCCC	TCCC	CCCC	CCCC	CCCC	TCCC	CCCC	CCCC	CCCC	CCCC	TCCC	TCCC	CCCC	CCCC	CCCC	CCCC
PotVar0014824	T	C	TCCC	TTCC	TTCC	TTCC	TTTC	TTCC	TTCC	TCCC	TTCC	TCCC	TTCC	TTCC	TTTC	TTCC	TTCC	TCCC	TTCC	TCCC	TCCC	TTTC	TTCC	TTTC	TTCC	CCCC	TTCC	TTCC	----	TCCC	TTTC	TTCC	TCCC	TTCC	TTCC	TTCC	TTTC	TTCC	TTTT	TTCC	TTTT	TTCC	TCCC	TTTC	TTCC	TTTT	TCCC	TCCC	TTCC
PotVar0014863	T	C	----	----	----	----	----	----	----	----	----	----	----	----	----	----	----	----	----	----	----	----	----	----	----	----	----	----	----	----	----	----	----	----	----	----	----	----	----	----	----	----	----	----	----	----	----	----	----
PotVar0014872	T	G	TTTT	TTTT	TTTT	TTTG	TTTG	TTTT	TTTT	TTTG	TTTT	TTTT	TTTT	TTTG	TTTT	TTTG	TTTT	TTTT	TTTT	TTTT	TTTT	TTGG	TTTT	TTTG	TTTT	TTTT	TTTG	TTTG	TTTT	TTTT	TTTG	TTTG	TTTT	TTTT	TTTT	TTGG	TTTG	TTTT	TTTG	TTTT	TTTG	TTTT	TTTT	TTTT	TTTT	TTTG	TTTG	TTTT	TTTT
PotVar0014877	T	G	----	TTGG	TTGG	TTGG	TTTG	TTGG	TTGG	TGGG	TTGG	TGGG	TTGG	TTGG	TTTG	TTGG	----	TGGG	TTGG	----	TGGG	TTTG	TTGG	----	TTGG	TGGG	----	TTTG	TTGG	----	TTTG	TTGG	TGGG	TTGG	TTGG	----	TTTG	TTGG	TTTT	TTGG	TTTT	GGGG	TGGG	TTTG	TTGG	TTTT	TGGG	TGGG	TTGG
PotVar0014908	T	C	----	----	----	----	----	----	----	----	----	----	----	----	----	----	----	----	----	----	----	----	----	----	----	----	----	----	----	----	----	----	----	----	----	----	----	----	----	----	----	----	----	----	----	----	----	----	----
PotVar0014967	A	G	GGGG	GGGG	GGGG	GGGG	GGGG	GGGG	AGGG	GGGG	GGGG	GGGG	AGGG	GGGG	GGGG	GGGG	AGGG	GGGG	AGGG	AGGG	AGGG	GGGG	GGGG	GGGG	GGGG	AGGG	GGGG	GGGG	GGGG	GGGG	GGGG	AGGG	AGGG	GGGG	GGGG	GGGG	----	GGGG	GGGG	GGGG	GGGG	GGGG	GGGG	GGGG	GGGG	GGGG	GGGG	GGGG	AGGG
PotVar0014978	T	C	CCCC	CCCC	CCCC	TCCC	TTCC	CCCC	CCCC	CCCC	TCCC	TCCC	CCCC	TTCC	TCCC	CCCC	CCCC	----	TTCC	CCCC	TCCC	TCCC	TCCC	TCCC	TCCC	TCCC	TCCC	TCCC	TTCC	TCCC	CCCC	TCCC	TTCC	TTTC	TCCC	TCCC	CCCC	TCCC	TCCC	TTCC	TCCC	TCCC	TCCC	TCCC	TCCC	TTCC	CCCC	TTCC	CCCC
PotVar0015043	A	G	AAAG	AAGG	AAAA	AAAG	AAAG	AAAG	AAAA	AAAG	AAAA	AAAA	AAAA	----	AAAA	AAAA	AAAG	AAAG	AAAG	AAGG	AAAA	AAGG	AAAA	AAAG	AAAA	AAAG	AAAG	AAAG	AAAG	AAAG	AAAA	AAAG	AAAA	AAAG	AAAA	AAAA	AAGG	AAAA	AAAA	AAAA	AAAG	AAAA	----	AAAA	AAAA	AAAG	AAAA	AAAA	AAAA
PotVar0015044	A	G	----	----	----	----	----	----	----	----	----	----	----	----	----	----	----	----	----	----	----	----	----	----	----	----	----	----	----	----	----	----	----	----	----	----	----	----	----	----	----	----	----	----	----	----	----	----	----
PotVar0015045	T	C	TTTT	TTTT	TTTT	TTTT	TTTT	TTTT	TTTT	TTTT	TTTT	TTTT	TTTT	TTTT	TTTT	TTTT	TTTT	TTTT	TTTT	TTTT	TTTT	TTTT	TTTT	TTTT	TTTT	TTTT	TTTT	TTTT	TTTT	TTTT	TTTT	TTTT	TTTT	TTTT	TTTT	TTTT	TTTT	TTTT	TTTT	TTTT	TTTT	TTTT	TTTC	TTTT	TTTT	TTTT	TTTT	TTTT	TTTT
PotVar0015063	T	C	TCCC	TTCC	CCCC	TCCC	TCCC	TCCC	CCCC	TCCC	CCCC	CCCC	CCCC	TCCC	CCCC	CCCC	TCCC	TCCC	TCCC	TTCC	CCCC	TTCC	CCCC	TCCC	CCCC	TCCC	TCCC	TCCC	TCCC	TCCC	CCCC	TCCC	CCCC	TCCC	CCCC	CCCC	TCCC	CCCC	CCCC	CCCC	TCCC	CCCC	TCCC	CCCC	CCCC	TCCC	CCCC	CCCC	CCCC
PotVar0015084	A	G	----	----	----	----	----	----	----	----	----	----	----	----	----	----	----	----	----	----	----	----	----	----	----	----	----	----	----	----	----	----	----	----	----	----	----	----	----	----	----	----	----	----	----	----	----	----	----
PotVar0015087	A	G	AGGG	AGGG	GGGG	GGGG	GGGG	AGGG	GGGG	GGGG	GGGG	GGGG	GGGG	GGGG	GGGG	GGGG	GGGG	AGGG	AGGG	AAGG	GGGG	AGGG	GGGG	GGGG	GGGG	AGGG	AGGG	AGGG	AGGG	AGGG	GGGG	AGGG	GGGG	AGGG	GGGG	GGGG	GGGG	GGGG	GGGG	GGGG	AGGG	GGGG	GGGG	GGGG	GGGG	GGGG	GGGG	GGGG	GGGG
PotVar0015104	T	C	CCCC	CCCC	CCCC	CCCC	CCCC	CCCC	CCCC	CCCC	CCCC	CCCC	CCCC	CCCC	CCCC	CCCC	CCCC	CCCC	CCCC	CCCC	CCCC	CCCC	CCCC	CCCC	CCCC	CCCC	CCCC	CCCC	CCCC	CCCC	CCCC	CCCC	CCCC	CCCC	CCCC	CCCC	CCCC	CCCC	CCCC	CCCC	CCCC	CCCC	TCCC	CCCC	CCCC	CCCC	CCCC	CCCC	CCCC
PotVar0015107	A	C	----	----	----	----	----	----	----	----	----	----	----	----	----	----	----	----	----	----	----	----	----	----	----	----	----	----	----	----	----	----	----	----	----	----	----	----	----	----	----	----	----	----	----	----	----	----	----
PotVar0015108	T	C	TCCC	TCCC	CCCC	CCCC	CCCC	TCCC	CCCC	CCCC	CCCC	CCCC	CCCC	CCCC	CCCC	CCCC	CCCC	TCCC	TCCC	TTCC	CCCC	TCCC	CCCC	CCCC	CCCC	TCCC	TCCC	TCCC	TCCC	TCCC	CCCC	TCCC	CCCC	TCCC	CCCC	CCCC	CCCC	CCCC	CCCC	CCCC	TCCC	CCCC	CCCC	CCCC	CCCC	CCCC	CCCC	CCCC	CCCC
PotVar0015145	T	C	TCCC	TCCC	CCCC	CCCC	CCCC	TCCC	CCCC	CCCC	CCCC	CCCC	CCCC	CCCC	CCCC	CCCC	TCCC	TCCC	TCCC	TTCC	CCCC	TCCC	CCCC	CCCC	CCCC	TCCC	TCCC	TCCC	TCCC	TCCC	CCCC	CCCC	CCCC	TCCC	CCCC	CCCC	TCCC	CCCC	CCCC	CCCC	TCCC	CCCC	CCCC	CCCC	CCCC	CCCC	CCCC	CCCC	CCCC
PotVar0015148	T	C	----	----	----	----	----	----	----	----	----	----	----	----	----	----	----	----	----	----	----	----	----	----	----	----	----	----	----	----	----	----	----	----	----	----	----	----	----	----	----	----	----	----	----	----	----	----	----
PotVar0015152	T	C	TCCC	TCCC	TCCC	----	TTCC	TTCC	TCCC	TTCC	TCCC	CCCC	TTCC	TTTC	TCCC	TCCC	TCCC	TTCC	TTCC	TTTC	TCCC	TTCC	TTCC	TTCC	TCCC	TCCC	TTTC	TTTC	TTCC	TTTC	TCCC	CCCC	TTCC	TTCC	TCCC	TCCC	TTTC	TTCC	TTCC	CCCC	TCCC	TTCC	TCCC	TTTC	TTTC	TCCC	TTCC	TTCC	CCCC
PotVar0015154	A	G	GGGG	GGGG	GGGG	AGGG	AGGG	GGGG	GGGG	AGGG	GGGG	GGGG	GGGG	AGGG	GGGG	GGGG	GGGG	GGGG	GGGG	GGGG	GGGG	AGGG	GGGG	AGGG	GGGG	GGGG	GGGG	GGGG	GGGG	GGGG	GGGG	GGGG	GGGG	GGGG	GGGG	GGGG	AGGG	GGGG	GGGG	GGGG	GGGG	GGGG	GGGG	GGGG	GGGG	AGGG	GGGG	GGGG	GGGG
PotVar0015156	T	C	CCCC	CCCC	CCCC	CCCC	CCCC	CCCC	CCCC	CCCC	CCCC	CCCC	CCCC	CCCC	TCCC	CCCC	CCCC	CCCC	CCCC	CCCC	CCCC	CCCC	CCCC	CCCC	CCCC	CCCC	CCCC	CCCC	CCCC	CCCC	CCCC	CCCC	CCCC	CCCC	CCCC	CCCC	CCCC	CCCC	CCCC	CCCC	CCCC	CCCC	CCCC	CCCC	CCCC	CCCC	CCCC	TCCC	CCCC
PotVar0015167	T	C	----	----	----	----	----	----	----	----	----	----	----	----	----	----	----	----	----	----	----	----	----	----	----	----	----	----	----	----	----	----	----	----	----	----	----	----	----	----	----	----	----	----	----	----	----	----	----
PotVar0015174	A	C	ACCC	ACCC	CCCC	CCCC	CCCC	ACCC	CCCC	CCCC	CCCC	CCCC	CCCC	CCCC	CCCC	CCCC	CCCC	ACCC	ACCC	AACC	CCCC	ACCC	CCCC	CCCC	CCCC	ACCC	ACCC	ACCC	ACCC	----	CCCC	CCCC	CCCC	ACCC	CCCC	CCCC	ACCC	CCCC	CCCC	CCCC	ACCC	CCCC	CCCC	CCCC	CCCC	CCCC	CCCC	CCCC	CCCC
PotVar0015177	T	C	CCCC	CCCC	CCCC	CCCC	CCCC	CCCC	CCCC	CCCC	CCCC	CCCC	CCCC	CCCC	CCCC	CCCC	CCCC	CCCC	CCCC	CCCC	CCCC	CCCC	CCCC	CCCC	CCCC	CCCC	CCCC	CCCC	CCCC	TCCC	CCCC	CCCC	TCCC	CCCC	CCCC	CCCC	CCCC	CCCC	CCCC	CCCC	CCCC	CCCC	CCCC	CCCC	CCCC	CCCC	CCCC	CCCC	CCCC
PotVar0015185	T	G	----	----	----	----	----	----	----	----	----	----	----	----	----	----	----	----	----	----	----	----	----	----	----	----	----	----	----	----	----	----	----	----	----	----	----	----	----	----	----	----	----	----	----	----	----	----	----
PotVar0015207	A	G	AGGG	AGGG	GGGG	GGGG	GGGG	AGGG	GGGG	AGGG	GGGG	GGGG	GGGG	GGGG	GGGG	GGGG	GGGG	AGGG	AGGG	AAGG	GGGG	AGGG	GGGG	GGGG	GGGG	AGGG	AGGG	AGGG	AGGG	----	GGGG	GGGG	GGGG	AGGG	GGGG	GGGG	AGGG	GGGG	GGGG	GGGG	AGGG	GGGG	GGGG	GGGG	GGGG	GGGG	GGGG	GGGG	GGGG
PotVar0015253	A	G	----	----	----	----	----	----	----	----	----	----	----	----	----	----	----	----	----	----	----	----	----	----	----	----	----	----	----	----	----	----	----	----	----	----	----	----	----	----	----	----	----	----	----	----	----	----	----
PotVar0015254	T	G	GGGG	GGGG	GGGG	GGGG	GGGG	GGGG	GGGG	GGGG	GGGG	GGGG	GGGG	GGGG	GGGG	GGGG	GGGG	GGGG	GGGG	GGGG	GGGG	GGGG	GGGG	GGGG	GGGG	GGGG	GGGG	GGGG	GGGG	GGGG	GGGG	GGGG	GGGG	GGGG	GGGG	GGGG	GGGG	GGGG	GGGG	GGGG	GGGG	GGGG	GGGG	GGGG	GGGG	GGGG	GGGG	GGGG	GGGG
PotVar0015255	A	G	GGGG	GGGG	GGGG	GGGG	GGGG	GGGG	GGGG	GGGG	GGGG	GGGG	GGGG	GGGG	GGGG	GGGG	GGGG	GGGG	GGGG	GGGG	GGGG	GGGG	GGGG	GGGG	GGGG	GGGG	GGGG	GGGG	GGGG	GGGG	GGGG	GGGG	GGGG	GGGG	GGGG	GGGG	GGGG	GGGG	GGGG	GGGG	GGGG	GGGG	GGGG	GGGG	GGGG	GGGG	GGGG	GGGG	GGGG
PotVar0015257	A	G	----	----	----	----	----	----	----	----	----	----	----	----	----	----	----	----	----	----	----	----	----	----	----	----	----	----	----	----	----	----	----	----	----	----	----	----	----	----	----	----	----	----	----	----	----	----	----
PotVar0015259	T	C	----	----	----	----	----	----	----	----	----	----	----	----	----	----	----	----	----	----	----	----	----	----	----	----	----	----	----	----	----	----	----	----	----	----	----	----	----	----	----	----	----	----	----	----	----	----	----
PotVar0015267	T	C	CCCC	CCCC	CCCC	CCCC	CCCC	CCCC	CCCC	CCCC	CCCC	CCCC	CCCC	CCCC	CCCC	CCCC	CCCC	CCCC	CCCC	CCCC	CCCC	CCCC	CCCC	CCCC	CCCC	CCCC	CCCC	CCCC	CCCC	CCCC	CCCC	CCCC	CCCC	CCCC	CCCC	CCCC	CCCC	CCCC	CCCC	CCCC	CCCC	CCCC	CCCC	CCCC	CCCC	CCCC	CCCC	CCCC	CCCC
PotVar0015284	T	C	----	----	----	----	----	----	----	----	----	----	----	----	----	----	----	----	----	----	----	----	----	----	----	----	----	----	----	----	----	----	----	----	----	----	----	----	----	----	----	----	----	----	----	----	----	----	----
PotVar0015291	T	C	TTTC	TTTC	TTTC	TTTC	TTCC	TTCC	TTTC	TTCC	TTTC	TTTT	TTCC	TCCC	TTTT	TTTC	TTTC	TTCC	TTCC	TCCC	TTTC	TTCC	TTCC	TTCC	TTTC	TTTC	TCCC	TCCC	TTCC	TCCC	TTTC	TTTT	TTCC	TTCC	TTTC	TTTC	TCCC	TTCC	TTCC	TTTT	TTTC	TTCC	TTTC	TCCC	TCCC	TTTC	TTCC	TTTC	TTTT
PotVar0015295	T	C	CCCC	CCCC	CCCC	CCCC	TCCC	CCCC	CCCC	CCCC	CCCC	CCCC	CCCC	TCCC	CCCC	CCCC	CCCC	CCCC	TCCC	CCCC	CCCC	CCCC	CCCC	----	CCCC	CCCC	CCCC	CCCC	CCCC	CCCC	CCCC	CCCC	CCCC	CCCC	CCCC	TCCC	TCCC	TCCC	TCCC	CCCC	CCCC	CCCC	TCCC	CCCC	TCCC	CCCC	CCCC	CCCC	CCCC
PotVar0015302	A	G	AAAA	AAAA	AAAA	AAAA	AAAA	AAAA	AAAA	AAAA	AAAA	AAAA	AAAA	AAAA	AAAA	AAAA	AAAG	AAAA	AAAA	AAAA	AAAA	AAAA	AAAA	AAAA	AAAA	AAAA	AAAA	AAAA	AAAA	AAAA	AAAA	AAAA	AAAA	AAAA	AAAA	AAAA	AAAA	AAAA	AAAA	AAAA	AAAA	AAAA	AAAA	AAAA	AAAA	AAAA	AAAA	AAAA	AAAA
PotVar0015325	T	C	----	----	----	----	----	----	----	----	----	----	----	----	----	----	----	----	----	----	----	----	----	----	----	----	----	----	----	----	----	----	----	----	----	----	----	----	----	----	----	----	----	----	----	----	----	----	----
PotVar0015326	T	C	CCCC	CCCC	TCCC	CCCC	TCCC	TCCC	TCCC	TCCC	TCCC	CCCC	TTCC	TTCC	CCCC	TCCC	CCCC	TCCC	TCCC	TCCC	TCCC	CCCC	TTCC	TCCC	TCCC	CCCC	TTCC	TTCC	TCCC	TTCC	TCCC	CCCC	TTCC	TCCC	TCCC	TCCC	TTTC	TTCC	TTCC	CCCC	CCCC	TTCC	TCCC	TTTC	TTTC	CCCC	TTCC	TCCC	CCCC
PotVar0015370	A	G	GGGG	AAGG	AAAG	GGGG	AAGG	AAGG	AAAG	AAGG	AAAG	AAGG	AGGG	GGGG	AGGG	AAGG	AAGG	AAGG	AAAG	GGGG	AGGG	AGGG	AGGG	AAGG	AGGG	AAGG	AGGG	AGGG	AGGG	GGGG	AAAG	AAAG	AGGG	AAGG	AGGG	AAGG	AGGG	AAGG	AAAG	AAAG	AAGG	AAAG	AAAG	AAGG	GGGG	AAAG	AAGG	GGGG	AAGG
PotVar0015371	A	G	GGGG	GGGG	GGGG	GGGG	GGGG	GGGG	GGGG	GGGG	GGGG	GGGG	GGGG	GGGG	GGGG	GGGG	AGGG	GGGG	GGGG	GGGG	GGGG	GGGG	GGGG	GGGG	GGGG	GGGG	GGGG	GGGG	GGGG	GGGG	GGGG	GGGG	GGGG	GGGG	GGGG	GGGG	GGGG	GGGG	GGGG	GGGG	GGGG	GGGG	GGGG	GGGG	GGGG	GGGG	GGGG	GGGG	GGGG
PotVar0015390	T	C	----	----	----	----	----	----	----	----	----	----	----	----	----	----	----	----	----	----	----	----	----	----	----	----	----	----	----	----	----	----	----	----	----	----	----	----	----	----	----	----	----	----	----	----	----	----	----
PotVar0015399	A	C	----	----	----	----	----	----	----	----	----	----	----	----	----	----	----	----	----	----	----	----	----	----	----	----	----	----	----	----	----	----	----	----	----	----	----	----	----	----	----	----	----	----	----	----	----	----	----
PotVar0015403	T	C	----	----	----	----	----	----	----	----	----	----	----	----	----	----	----	----	----	----	----	----	----	----	----	----	----	----	----	----	----	----	----	----	----	----	----	----	----	----	----	----	----	----	----	----	----	----	----
PotVar0015417	A	C	----	----	----	----	----	----	----	----	----	----	----	----	----	----	----	----	----	----	----	----	----	----	----	----	----	----	----	----	----	----	----	----	----	----	----	----	----	----	----	----	----	----	----	----	----	----	----
PotVar0015419	A	C	AAAA	AAAA	AAAA	AAAA	AAAA	AAAA	AAAA	AAAA	AAAA	AAAA	AAAA	AAAA	AAAA	AAAA	AAAA	AAAA	AAAA	AAAA	AAAA	AAAA	AAAA	AAAA	AAAA	AAAA	AAAA	AAAA	AAAA	AAAA	AAAA	AAAA	AAAA	AAAA	AAAA	AAAA	AAAA	AAAA	AAAA	AAAA	AAAA	AAAA	AAAA	AAAA	AAAA	AAAA	AAAA	AAAA	AAAA
PotVar0015420	T	G	GGGG	GGGG	GGGG	GGGG	GGGG	GGGG	GGGG	GGGG	GGGG	GGGG	GGGG	GGGG	GGGG	GGGG	TGGG	GGGG	GGGG	GGGG	GGGG	GGGG	GGGG	GGGG	GGGG	GGGG	GGGG	GGGG	GGGG	GGGG	GGGG	GGGG	GGGG	GGGG	GGGG	GGGG	GGGG	GGGG	GGGG	GGGG	GGGG	GGGG	GGGG	GGGG	GGGG	GGGG	GGGG	GGGG	GGGG
PotVar0015423	T	G	TTTT	TTTT	TTTT	TTTT	TTTT	TTTT	TTTT	TTTT	TTTT	TTTT	TTTT	TTTT	TTTT	TTTT	TTTT	TTTT	TTTT	TTTT	TTTT	TTTT	TTTT	TTTT	TTTT	TTTT	TTTT	TTTT	TTTT	TTTT	TTTT	TTTT	TTTT	TTTT	TTTT	TTTT	TTTT	TTTT	TTTT	TTTT	TTTT	TTTT	TTTT	TTTT	TTTT	TTTT	TTTT	TTTT	TTTT
PotVar0015433	A	G	----	----	----	----	----	----	----	----	----	----	----	----	----	----	----	----	----	----	----	----	----	----	----	----	----	----	----	----	----	----	----	----	----	----	----	----	----	----	----	----	----	----	----	----	----	----	----
PotVar0015456	A	C	ACCC	ACCC	CCCC	AAAC	ACCC	ACCC	ACCC	ACCC	ACCC	AACC	AAAC	AAAC	AACC	AACC	ACCC	ACCC	CCCC	AACC	AAAC	ACCC	AAAC	ACCC	AAAC	ACCC	AACC	AACC	AACC	AACC	ACCC	ACCC	AAAC	ACCC	AAAC	ACCC	ACCC	AACC	ACCC	ACCC	ACCC	ACCC	ACCC	AACC	AAAA	CCCC	AACC	AAAC	AACC
PotVar0015513	T	C	TTTC	TTTC	TTTT	TTTT	TTTT	TTTC	TTTT	TTTT	TTTT	TTTT	TTTT	TTTT	TTTT	TTTT	TTTT	TTTC	TTTC	----	TTTT	TTTC	TTTT	TTTT	TTTT	TTTC	TTTC	TTTC	TTTC	TTTC	TTTT	TTTT	TTTT	TTTC	TTTT	TTTC	TTTT	TTTT	TTTT	TTTT	TTTC	TTTT	TTTT	TTTT	TTTT	TTTT	TTTT	TTTT	TTTT
PotVar0015526	T	G	----	----	----	----	----	----	----	----	----	----	----	----	----	----	----	----	----	----	----	----	----	----	----	----	----	----	----	----	----	----	----	----	----	----	----	----	----	----	----	----	----	----	----	----	----	----	----
PotVar0015535	T	C	TTTT	TTTT	CCCC	TTTC	TTCC	TTCC	TTCC	TTCC	TCCC	TTTC	TCCC	TTTT	TTTC	----	TCCC	TCCC	TTCC	TTCC	TTCC	TTTC	TCCC	----	TTTC	TTCC	TCCC	TCCC	TTCC	TTCC	CCCC	TCCC	TTTT	TCCC	TTTC	TTCC	TTTC	TTCC	TTCC	TCCC	TTCC	TTTC	TTCC	TCCC	TTTC	TTCC	CCCC	TTTT	TTTC
PotVar0015546	T	G	TGGG	TTGG	TTTT	TTGG	TTTG	TTTG	TTGG	TTTG	TTTG	TGGG	TTTG	TGGG	TTGG	TTTT	TTTT	TTTT	TTTT	TTTT	TTGG	TTTG	TTTG	----	TGGG	TTTG	TTTT	TTTT	TTTG	TTTG	TTTT	TTTG	TGGG	TTTT	TGGG	TTTT	TTTT	TTTG	TTTG	TTTG	TTTG	TGGG	TTTG	TTTG	TTGG	TTTG	TTTT	GGGG	TTGG
PotVar0015553	T	C	TTTT	TTTT	TTTT	TTTT	TTTT	TTTT	TTTT	TTTT	TTTT	TTTT	TTTT	TTTT	TTTT	TTTT	TTTT	TTTT	TTTT	TTTT	TTTT	TTTT	TTTT	TTTT	TTTT	TTTT	TTTT	TTTT	TTTT	TTTC	TTTT	TTTT	TTTT	TTTT	TTTT	TTTT	TTTT	TTTT	TTTT	TTTT	TTTT	TTTT	TTTT	TTTT	TTTT	TTTT	TTTT	TTTT	TTTT
PotVar0015559	T	C	CCCC	CCCC	CCCC	CCCC	TCCC	CCCC	CCCC	CCCC	CCCC	CCCC	CCCC	TCCC	CCCC	CCCC	CCCC	CCCC	TCCC	CCCC	CCCC	CCCC	CCCC	CCCC	CCCC	CCCC	CCCC	CCCC	CCCC	CCCC	CCCC	CCCC	TCCC	CCCC	CCCC	TCCC	TCCC	TCCC	TCCC	CCCC	CCCC	CCCC	TCCC	CCCC	TCCC	CCCC	CCCC	CCCC	CCCC
PotVar0015560	A	G	AAAA	AAAG	AAAA	AAAA	AAAA	AAAA	AAAA	AAAA	AAAA	AAAA	AAAA	AAAA	AAAA	AAAG	AAAA	AAAA	AAAA	AAAA	AAAA	AAAA	AAAA	AAAA	AAAA	AAAA	AAAA	AAAA	AAAA	AAAA	AAAA	AAAA	AAAA	AAAA	AAAA	AAAA	AAAA	AAAA	AAAA	AAAA	AAAA	AAAA	AAAA	AAAA	AAAA	AAAA	AAAA	AAAA	AAAG
PotVar0015573	T	C	CCCC	TCCC	CCCC	CCCC	CCCC	CCCC	CCCC	CCCC	CCCC	CCCC	CCCC	CCCC	TCCC	TCCC	CCCC	CCCC	CCCC	CCCC	CCCC	CCCC	CCCC	CCCC	CCCC	CCCC	CCCC	CCCC	CCCC	CCCC	CCCC	CCCC	CCCC	CCCC	CCCC	CCCC	CCCC	CCCC	CCCC	CCCC	CCCC	CCCC	CCCC	CCCC	CCCC	CCCC	CCCC	CCCC	TCCC
PotVar0015582	A	G	GGGG	GGGG	GGGG	GGGG	GGGG	GGGG	GGGG	GGGG	GGGG	GGGG	GGGG	GGGG	GGGG	GGGG	GGGG	GGGG	GGGG	GGGG	GGGG	GGGG	GGGG	GGGG	GGGG	GGGG	GGGG	GGGG	GGGG	GGGG	GGGG	GGGG	GGGG	GGGG	GGGG	GGGG	GGGG	GGGG	GGGG	GGGG	GGGG	GGGG	GGGG	GGGG	GGGG	GGGG	GGGG	GGGG	GGGG
PotVar0015583	T	C	TTTC	TTTC	TTTT	TTTT	TTTT	TTTC	TTTT	TTTT	TTTT	TTTT	TTTT	TTTT	TTTT	TTTT	TTTT	TTTC	TTTC	TTCC	TTTT	TTTC	TTTT	TTTT	TTTT	TTTC	TTTC	TTTC	TTTC	TTTC	TTTT	TTTT	TTTT	TTTC	TTTT	TTTC	TTTT	TTTT	TTTT	TTTT	TTTC	TTTT	TTTT	TTTT	TTTT	TTTT	TTTT	TTTT	TTTT
PotVar0015587	A	G	----	----	----	----	----	----	----	----	----	----	----	----	----	----	----	----	----	----	----	----	----	----	----	----	----	----	----	----	----	----	----	----	----	----	----	----	----	----	----	----	----	----	----	----	----	----	----
PotVar0015588	A	G	AAAG	AAAG	AAAA	AAAG	AAAG	AAAG	AAAA	AAAG	AAAA	AAAA	AAAA	AAAG	AAAA	AAAA	AAAG	AAAG	AAAG	AAGG	AAAA	AAGG	AAAA	----	AAAA	AAAG	AAAG	AAAG	AAAG	AAGG	AAAA	AAAA	AAAA	AAAG	AAAA	AAAG	AAGG	AAAA	AAAA	AAAA	AAAG	AAAA	AAAA	AAAA	AAAA	AAAG	AAAA	AAAA	AAAA
PotVar0015597	T	C	TTTC	TTCC	TTTT	TTTC	TTTC	TTTC	TTTT	TTTC	TTTT	TTTT	TTTT	TTTC	TTTC	TTTC	TTTC	TTTC	TTTC	TTCC	TTTT	TTCC	TTTT	TTTC	TTTT	TTTC	TTTC	TTTC	TTTC	TTCC	TTTT	TTTT	TTTT	TTTC	TTTT	TTTC	TTTC	TTTT	TTTT	TTTT	TTTC	TTTT	TTTT	TTTT	TTTT	TTTC	TTTT	TTTT	TTTC
PotVar0015606	A	G	----	----	----	----	----	----	----	----	----	----	----	----	----	----	----	----	----	----	----	----	----	----	----	----	----	----	----	----	----	----	----	----	----	----	----	----	----	----	----	----	----	----	----	----	----	----	----
PotVar0015617	T	C	----	----	----	----	----	----	----	----	----	----	----	----	----	----	----	----	----	----	----	----	----	----	----	----	----	----	----	----	----	----	----	----	----	----	----	----	----	----	----	----	----	----	----	----	----	----	----
PotVar0015618	A	G	----	----	----	----	----	----	----	----	----	----	----	----	----	----	----	----	----	----	----	----	----	----	----	----	----	----	----	----	----	----	----	----	----	----	----	----	----	----	----	----	----	----	----	----	----	----	----
PotVar0015634	A	C	----	----	----	----	----	----	----	----	----	----	----	----	----	----	----	----	----	----	----	----	----	----	----	----	----	----	----	----	----	----	----	----	----	----	----	----	----	----	----	----	----	----	----	----	----	----	----
PotVar0015638	A	C	----	----	----	----	----	----	----	----	----	----	----	----	----	----	----	----	----	----	----	----	----	----	----	----	----	----	----	----	----	----	----	----	----	----	----	----	----	----	----	----	----	----	----	----	----	----	----
PotVar0015639	T	C	TCCC	TTCC	CCCC	TCCC	TTCC	TCCC	CCCC	TCCC	CCCC	CCCC	CCCC	TTCC	TCCC	TCCC	TCCC	TCCC	TTCC	TTCC	CCCC	TTCC	CCCC	TCCC	CCCC	TCCC	TCCC	TCCC	TCCC	TTCC	CCCC	CCCC	TCCC	TCCC	CCCC	TTCC	TTTC	TCCC	TCCC	CCCC	TCCC	CCCC	TCCC	CCCC	TCCC	TCCC	CCCC	CCCC	TCCC
PotVar0015665	A	G	----	----	----	----	----	----	----	----	----	----	----	----	----	----	----	----	----	----	----	----	----	----	----	----	----	----	----	----	----	----	----	----	----	----	----	----	----	----	----	----	----	----	----	----	----	----	----
PotVar0015674	T	C	CCCC	TCCC	CCCC	CCCC	CCCC	CCCC	CCCC	CCCC	CCCC	CCCC	CCCC	CCCC	TCCC	TCCC	CCCC	CCCC	CCCC	CCCC	CCCC	CCCC	CCCC	CCCC	CCCC	CCCC	CCCC	CCCC	CCCC	CCCC	CCCC	CCCC	CCCC	CCCC	CCCC	CCCC	CCCC	CCCC	CCCC	CCCC	CCCC	CCCC	CCCC	CCCC	CCCC	CCCC	CCCC	CCCC	TCCC
PotVar0015675	A	C	----	----	----	----	----	----	----	----	----	----	----	----	----	----	----	----	----	----	----	----	----	----	----	----	----	----	----	----	----	----	----	----	----	----	----	----	----	----	----	----	----	----	----	----	----	----	----
PotVar0015704	T	C	CCCC	CCCC	CCCC	CCCC	CCCC	CCCC	CCCC	CCCC	CCCC	CCCC	CCCC	CCCC	CCCC	CCCC	CCCC	CCCC	CCCC	CCCC	CCCC	CCCC	CCCC	CCCC	CCCC	CCCC	CCCC	CCCC	CCCC	TTCC	CCCC	CCCC	CCCC	CCCC	CCCC	CCCC	CCCC	CCCC	CCCC	CCCC	CCCC	CCCC	CCCC	CCCC	CCCC	CCCC	CCCC	CCCC	CCCC
PotVar0015706	T	C	----	----	----	----	----	----	----	----	----	----	----	----	----	----	----	----	----	----	----	----	----	----	----	----	----	----	----	----	----	----	----	----	----	----	----	----	----	----	----	----	----	----	----	----	----	----	----
PotVar0015711	A	G	----	----	----	----	----	----	----	----	----	----	----	----	----	----	----	----	----	----	----	----	----	----	----	----	----	----	----	----	----	----	----	----	----	----	----	----	----	----	----	----	----	----	----	----	----	----	----
PotVar0015713	T	G	----	----	----	----	----	----	----	----	----	----	----	----	----	----	----	----	----	----	----	----	----	----	----	----	----	----	----	----	----	----	----	----	----	----	----	----	----	----	----	----	----	----	----	----	----	----	----
PotVar0015716	A	G	----	----	----	----	----	----	----	----	----	----	----	----	----	----	----	----	----	----	----	----	----	----	----	----	----	----	----	----	----	----	----	----	----	----	----	----	----	----	----	----	----	----	----	----	----	----	----
PotVar0015717	A	G	GGGG	AGGG	GGGG	GGGG	GGGG	GGGG	GGGG	GGGG	GGGG	GGGG	GGGG	GGGG	AGGG	AGGG	GGGG	GGGG	GGGG	GGGG	GGGG	GGGG	GGGG	GGGG	GGGG	GGGG	GGGG	GGGG	GGGG	GGGG	GGGG	GGGG	GGGG	GGGG	GGGG	GGGG	GGGG	GGGG	GGGG	GGGG	GGGG	GGGG	GGGG	GGGG	GGGG	GGGG	GGGG	GGGG	AGGG
PotVar0015718	T	C	----	----	----	----	----	----	----	----	----	----	----	----	----	----	----	----	----	----	----	----	----	----	----	----	----	----	----	----	----	----	----	----	----	----	----	----	----	----	----	----	----	----	----	----	----	----	----
PotVar0015728	A	G	AGGG	AGGG	GGGG	GGGG	GGGG	AGGG	GGGG	GGGG	GGGG	GGGG	GGGG	GGGG	GGGG	GGGG	GGGG	AGGG	AGGG	AAGG	GGGG	AGGG	GGGG	GGGG	GGGG	AGGG	AGGG	AGGG	AGGG	AGGG	GGGG	GGGG	GGGG	AGGG	GGGG	AGGG	AGGG	GGGG	GGGG	GGGG	AGGG	GGGG	GGGG	GGGG	GGGG	GGGG	GGGG	GGGG	GGGG
PotVar0015743	T	C	----	----	----	----	----	----	----	----	----	----	----	----	----	----	----	----	----	----	----	----	----	----	----	----	----	----	----	----	----	----	----	----	----	----	----	----	----	----	----	----	----	----	----	----	----	----	----
PotVar0015746	T	C	TTTT	TTTT	TTTT	TTTT	TTTC	TTTT	TTTT	TTTT	TTTT	TTTT	TTTT	TTTC	TTTT	TTTT	TTTT	TTTT	TTTC	TTTT	TTTT	TTTT	TTTT	TTTT	TTTT	TTTT	TTTT	TTTT	TTTT	TTTT	TTTT	TTTT	TTTC	TTTT	TTTT	TTTC	TTTC	TTTC	TTTC	TTTT	TTTT	TTTT	TTTC	TTTT	TTTC	TTTT	TTTT	TTTT	TTTT
PotVar0015774	T	G	----	----	----	----	----	----	----	----	----	----	----	----	----	----	----	----	----	----	----	----	----	----	----	----	----	----	----	----	----	----	----	----	----	----	----	----	----	----	----	----	----	----	----	----	----	----	----
PotVar0015777	A	C	----	----	----	----	----	----	----	----	----	----	----	----	----	----	----	----	----	----	----	----	----	----	----	----	----	----	----	----	----	----	----	----	----	----	----	----	----	----	----	----	----	----	----	----	----	----	----
PotVar0015803	T	C	----	----	----	----	----	----	----	----	----	----	----	----	----	----	----	----	----	----	----	----	----	----	----	----	----	----	----	----	----	----	----	----	----	----	----	----	----	----	----	----	----	----	----	----	----	----	----
PotVar0015809	T	C	----	----	----	----	----	----	----	----	----	----	----	----	----	----	----	----	----	----	----	----	----	----	----	----	----	----	----	----	----	----	----	----	----	----	----	----	----	----	----	----	----	----	----	----	----	----	----
PotVar0015826	A	G	----	----	----	----	----	----	----	----	----	----	----	----	----	----	----	----	----	----	----	----	----	----	----	----	----	----	----	----	----	----	----	----	----	----	----	----	----	----	----	----	----	----	----	----	----	----	----
PotVar0015848	T	G	TGGG	TTGG	GGGG	TGGG	TTGG	TGGG	GGGG	TGGG	GGGG	GGGG	GGGG	TTGG	TGGG	TGGG	TGGG	TGGG	TTGG	TTGG	GGGG	TTGG	GGGG	TGGG	GGGG	TGGG	TGGG	TGGG	TGGG	TTGG	GGGG	GGGG	TGGG	TGGG	GGGG	TTGG	TTTG	TGGG	TGGG	GGGG	TGGG	GGGG	TGGG	GGGG	TGGG	TGGG	GGGG	GGGG	TGGG
PotVar0015849	A	G	AAAA	AAAA	AAAA	AAAA	AAAA	AAAA	AAAA	AAAA	AAAA	AAAA	AAAA	AAAA	AAAA	AAAA	AAAA	AAAA	AAAA	AAAA	AAAA	AAAA	AAAA	AAAA	AAAA	AAAA	AAAA	AAAA	AAAA	AAAA	AAAA	AAAA	AAAA	AAAA	AAAA	AAAA	AAAA	AAAA	AAAA	AAAA	AAAA	AAAA	AAAA	AAAA	AAAA	AAAA	AAAA	AAAA	AAAA
PotVar0015856	A	G	----	----	----	----	----	----	----	----	----	----	----	----	----	----	----	----	----	----	----	----	----	----	----	----	----	----	----	----	----	----	----	----	----	----	----	----	----	----	----	----	----	----	----	----	----	----	----
PotVar0015864	A	G	AGGG	AGGG	GGGG	GGGG	GGGG	AGGG	GGGG	GGGG	GGGG	GGGG	GGGG	GGGG	GGGG	GGGG	GGGG	AGGG	AGGG	AAGG	GGGG	AGGG	GGGG	GGGG	GGGG	AGGG	AGGG	AGGG	AGGG	AGGG	GGGG	GGGG	GGGG	AGGG	GGGG	AGGG	GGGG	GGGG	GGGG	GGGG	AGGG	GGGG	GGGG	GGGG	GGGG	GGGG	GGGG	GGGG	GGGG
PotVar0015888	A	C	AAAA	AAAA	AAAA	AAAA	AAAA	AAAA	AAAA	AAAA	AAAA	AAAA	AAAA	AAAA	AAAA	AAAA	AAAC	AAAA	AAAA	AAAA	AAAA	AAAA	AAAA	AAAA	AAAA	AAAA	AAAA	AAAA	AAAA	AAAA	AAAA	AAAA	AAAA	AAAA	AAAA	AAAA	AAAA	AAAA	AAAA	AAAA	AAAA	AAAA	AAAA	AAAA	AAAA	AAAA	AAAA	AAAA	AAAA
PotVar0015898	A	G	----	----	----	----	----	----	----	----	----	----	----	----	----	----	----	----	----	----	----	----	----	----	----	----	----	----	----	----	----	----	----	----	----	----	----	----	----	----	----	----	----	----	----	----	----	----	----
PotVar0015899	A	G	----	----	----	----	----	----	----	----	----	----	----	----	----	----	----	----	----	----	----	----	----	----	----	----	----	----	----	----	----	----	----	----	----	----	----	----	----	----	----	----	----	----	----	----	----	----	----
PotVar0015903	A	G	GGGG	GGGG	GGGG	GGGG	AGGG	GGGG	GGGG	GGGG	GGGG	GGGG	GGGG	AGGG	GGGG	GGGG	GGGG	GGGG	AGGG	GGGG	GGGG	GGGG	GGGG	GGGG	GGGG	GGGG	GGGG	GGGG	GGGG	GGGG	GGGG	GGGG	AGGG	GGGG	GGGG	AGGG	AGGG	AGGG	AGGG	GGGG	GGGG	GGGG	AGGG	GGGG	AGGG	GGGG	GGGG	GGGG	GGGG
PotVar0015907	A	G	----	----	----	----	----	----	----	----	----	----	----	----	----	----	----	----	----	----	----	----	----	----	----	----	----	----	----	----	----	----	----	----	----	----	----	----	----	----	----	----	----	----	----	----	----	----	----
PotVar0015911	A	G	----	----	----	----	----	----	----	----	----	----	----	----	----	----	----	----	----	----	----	----	----	----	----	----	----	----	----	----	----	----	----	----	----	----	----	----	----	----	----	----	----	----	----	----	----	----	----
PotVar0015916	T	G	TTTT	TTTT	TTTT	TTTT	TTTT	TTTT	TTTT	TTTT	TTTT	TTTT	TTTT	TTTT	TTTT	TTTT	TTTT	TTTT	TTTT	TTTT	TTTT	TTTT	TTTT	TTTT	TTTT	TTTT	TTTT	TTTT	TTTT	TTTG	TTTT	TTTT	TTTT	TTTT	TTTT	TTTT	TTTT	TTTT	TTTT	TTTT	TTTT	TTTT	TTTT	TTTT	TTTT	TTTT	TTTT	TTTT	TTTT
PotVar0015918	T	C	----	----	----	----	----	----	----	----	----	----	----	----	----	----	----	----	----	----	----	----	----	----	----	----	----	----	----	----	----	----	----	----	----	----	----	----	----	----	----	----	----	----	----	----	----	----	----
PotVar0015935	A	G	GGGG	AGGG	GGGG	GGGG	GGGG	GGGG	GGGG	GGGG	GGGG	GGGG	GGGG	GGGG	AGGG	AGGG	GGGG	GGGG	GGGG	GGGG	GGGG	GGGG	GGGG	GGGG	GGGG	GGGG	GGGG	GGGG	GGGG	GGGG	GGGG	GGGG	GGGG	GGGG	GGGG	GGGG	GGGG	GGGG	GGGG	GGGG	GGGG	GGGG	GGGG	GGGG	GGGG	GGGG	GGGG	GGGG	AGGG
PotVar0015940	T	C	TCCC	TTCC	CCCC	CCCC	CCCC	TCCC	CCCC	CCCC	CCCC	TCCC	CCCC	CCCC	TCCC	TCCC	CCCC	TCCC	TCCC	TTCC	CCCC	TCCC	CCCC	CCCC	CCCC	TCCC	TCCC	TCCC	TCCC	TCCC	CCCC	CCCC	CCCC	TCCC	CCCC	TCCC	TCCC	CCCC	CCCC	CCCC	TCCC	CCCC	CCCC	CCCC	CCCC	CCCC	CCCC	CCCC	TCCC
PotVar0015944	A	G	AAAA	AAAA	AAAA	AAAA	AAAA	AAAA	AAAA	AAAA	AAAA	AAAA	AAAA	AAAA	AAAA	AAAA	AAAG	AAAA	AAAA	AAAA	AAAA	AAAA	AAAA	AAAA	AAAA	AAAA	AAAA	AAAA	AAAA	AAAA	AAAA	AAAA	AAAA	AAAA	AAAA	AAAA	AAAA	AAAA	AAAA	AAAA	AAAA	AAAA	AAAA	AAAA	AAAA	AAAA	AAAA	AAAA	AAAA
PotVar0015961	A	C	CCCC	CCCC	CCCC	CCCC	CCCC	CCCC	CCCC	CCCC	CCCC	CCCC	CCCC	CCCC	CCCC	CCCC	ACCC	CCCC	CCCC	CCCC	CCCC	CCCC	CCCC	CCCC	CCCC	CCCC	CCCC	CCCC	CCCC	CCCC	CCCC	CCCC	CCCC	CCCC	CCCC	CCCC	CCCC	CCCC	CCCC	CCCC	CCCC	CCCC	CCCC	CCCC	CCCC	CCCC	CCCC	CCCC	CCCC
PotVar0015966	A	G	----	----	----	----	----	----	----	----	----	----	----	----	----	----	----	----	----	----	----	----	----	----	----	----	----	----	----	----	----	----	----	----	----	----	----	----	----	----	----	----	----	----	----	----	----	----	----
PotVar0015986	T	C	TTTT	TTTT	TTTT	TTTT	TTTT	TTTT	TTTT	TTTT	TTTT	TTTT	TTTT	TTTT	TTTT	TTTT	TTTT	TTTT	TTTT	TTTT	TTTT	TTTT	TTTT	TTTT	TTTT	TTTT	TTTT	TTTT	TTTT	TTTC	TTTT	TTTT	TTTT	TTTT	TTTT	TTTT	TTTT	TTTT	TTTT	TTTT	TTTT	TTTT	TTTT	TTTT	TTTT	TTTT	TTTT	TTTT	TTTT
PotVar0015987	T	C	TTTC	TTCC	TTTT	TTTC	TTCC	TTTC	TTTT	TTTC	TTTT	TTTC	TTTT	TCCC	TTTC	TTTC	TTTC	TTTC	TTCC	TTCC	TTTT	TTCC	TTTT	TTTC	TTTT	TTTC	TTTC	TTTC	TTTC	TTCC	TTTT	TTTT	TTCC	TTTC	TTTT	TTCC	TCCC	TTTC	TTTC	TTTT	TTTC	TTTT	TTTC	TTTT	TTCC	TTTC	TTTT	TTTC	TTTC
PotVar0015989	A	G	----	----	----	----	----	----	----	----	----	----	----	----	----	----	----	----	----	----	----	----	----	----	----	----	----	----	----	----	----	----	----	----	----	----	----	----	----	----	----	----	----	----	----	----	----	----	----
PotVar0015998	T	G	TTTG	TTTG	TTTT	TTTT	TTTT	TTTG	TTTT	TTTT	TTTT	TTTG	TTTT	TTTT	TTTT	TTTT	TTTT	TTTG	TTTG	TTGG	TTTT	TTTG	TTTT	TTTT	TTTT	TTTG	TTTG	TTTG	TTTG	TTTG	TTTT	TTTT	TTTT	TTTG	TTTT	TTTG	TTTT	TTTT	TTTT	TTTT	TTTG	TTTT	TTTT	TTTT	TTTT	TTTT	TTTT	TTTT	TTTT
PotVar0016029	T	G	----	----	----	----	----	----	----	----	----	----	----	----	----	----	----	----	----	----	----	----	----	----	----	----	----	----	----	----	----	----	----	----	----	----	----	----	----	----	----	----	----	----	----	----	----	----	----
PotVar0016042	A	G	----	----	----	----	----	----	----	----	----	----	----	----	----	----	----	----	----	----	----	----	----	----	----	----	----	----	----	----	----	----	----	----	----	----	----	----	----	----	----	----	----	----	----	----	----	----	----
PotVar0016047	A	C	----	----	----	----	----	----	----	----	----	----	----	----	----	----	----	----	----	----	----	----	----	----	----	----	----	----	----	----	----	----	----	----	----	----	----	----	----	----	----	----	----	----	----	----	----	----	----
PotVar0016049	T	C	CCCC	CCCC	CCCC	CCCC	CCCC	CCCC	CCCC	CCCC	CCCC	CCCC	CCCC	CCCC	TCCC	CCCC	CCCC	CCCC	CCCC	CCCC	CCCC	CCCC	CCCC	CCCC	CCCC	CCCC	CCCC	CCCC	CCCC	CCCC	CCCC	CCCC	CCCC	CCCC	CCCC	CCCC	CCCC	CCCC	CCCC	CCCC	CCCC	CCCC	CCCC	CCCC	CCCC	CCCC	CCCC	CCCC	CCCC
PotVar0016075	A	G	AAAA	AAAA	AAAA	AAAA	AAAA	AAAA	AAAG	AAAG	AAAA	AAAA	AAAA	AAAA	AAAA	AAAA	AAAA	AAAA	AAAA	AAAA	AAAA	AAAA	AAAA	AAAA	AAAA	AAAA	AAAA	AAAA	AAAA	AAAA	AAAA	AAAA	AAAA	AAAA	AAAA	AAAA	AAAA	AAAA	AAAG	AAAA	AAAA	AAAA	AAAA	AAAG	AAAA	AAAA	AAAA	AAAA	AAAA
PotVar0016094	T	G	----	----	----	----	----	----	----	----	----	----	----	----	----	----	----	----	----	----	----	----	----	----	----	----	----	----	----	----	----	----	----	----	----	----	----	----	----	----	----	----	----	----	----	----	----	----	----
PotVar0016123	T	C	TTTC	TTTC	TTTT	TTTC	TTTC	TTCC	TTTT	TTTC	TTTT	TTCC	TCCC	TTTC	TTTC	TTTT	TTTC	TTTC	TTTC	TTCC	TTTC	TCCC	TTTT	TTCC	TCCC	TTTC	TTCC	TTCC	TTTC	TTCC	TTTT	TTTC	TTTT	TTCC	TCCC	TTTC	TTCC	TTTC	TTTT	TTTC	TTCC	TTTT	TTTC	TTTT	TTTC	TCCC	TCCC	TTCC	TTTC
PotVar0016129	A	G	GGGG	GGGG	GGGG	AGGG	AGGG	GGGG	GGGG	AGGG	GGGG	AGGG	AGGG	AGGG	AGGG	GGGG	AGGG	GGGG	AGGG	GGGG	AGGG	AGGG	GGGG	AAGG	AAGG	GGGG	GGGG	GGGG	GGGG	AGGG	GGGG	AGGG	AAGG	GGGG	AAGG	GGGG	AGGG	AGGG	GGGG	AGGG	AGGG	GGGG	AAGG	GGGG	AAGG	AAGG	AGGG	AAAG	AGGG
PotVar0016132	T	G	TTTT	TTTT	TGGG	TTTT	TTTG	TTTG	TTTG	----	TTGG	TTTT	TTTT	TTTT	TTTG	TTGG	TTTG	TTTG	TTGG	TTTT	TTTG	TTTT	TTTG	TTTG	TTTT	TTTG	TTTT	TTTT	TTTT	TTTT	TGGG	TTTG	TTTT	TTTT	TTTT	TTGG	TTTG	TTTT	TTGG	TTGG	TTGG	TTTG	TTTT	TTTG	TTTG	TTTG	TTTT	TTTT	TTTG
PotVar0016133	T	G	TTTT	TTTT	TTTT	TTTT	TTTT	TTTT	TTTT	TTTT	TTTT	TTTT	TTTT	TTTG	TTTT	TTTT	TTTT	TTTT	TTTG	TTTT	TTTT	TTTT	TTTT	TTTT	TTTT	TTTT	TTTT	TTTT	TTTT	TTTT	TTTT	TTTT	TTGG	TTTT	TTTT	TTTT	TTTT	TTTG	TTTT	TTTT	TTTT	TTTT	TTTG	TTTT	TTTG	TTTT	TTTT	TTTG	TTTT
PotVar0016134	A	G	----	----	----	----	----	----	----	----	----	----	----	----	----	----	----	----	----	----	----	----	----	----	----	----	----	----	----	----	----	----	----	----	----	----	----	----	----	----	----	----	----	----	----	----	----	----	----
PotVar0016137	A	G	AAAG	AAAG	AAAA	AAAG	AAAG	AAGG	AAAA	AAAG	AAAA	AAAG	AAGG	AAGG	AAAA	AAAA	AAAG	AAAG	AAGG	AAGG	AAAA	AGGG	AAAA	AAAG	AAAG	AAAG	AAGG	AAGG	AAAG	AAGG	AAAA	AAAA	AAGG	AAGG	AAAG	AAAG	AAGG	AAGG	AAAA	AAAA	AAAG	AAAA	AAAG	AAAA	AAAG	AGGG	AAGG	AAAG	AAAA
PotVar0016140	T	C	TCCC	TCCC	CCCC	TCCC	CCCC	TTCC	CCCC	CCCC	CCCC	TCCC	TTCC	TCCC	CCCC	CCCC	TCCC	TCCC	TCCC	TTCC	CCCC	TTTC	CCCC	TCCC	TCCC	TCCC	TTCC	TTCC	TCCC	TTCC	CCCC	CCCC	CCCC	TTCC	TCCC	TCCC	TCCC	TCCC	CCCC	CCCC	TCCC	CCCC	CCCC	CCCC	CCCC	TTCC	TTCC	CCCC	CCCC
PotVar0016142	A	G	GGGG	GGGG	GGGG	AGGG	GGGG	GGGG	GGGG	GGGG	GGGG	GGGG	GGGG	AGGG	GGGG	GGGG	GGGG	GGGG	GGGG	GGGG	GGGG	AGGG	GGGG	AGGG	GGGG	GGGG	GGGG	GGGG	GGGG	GGGG	GGGG	GGGG	GGGG	GGGG	GGGG	GGGG	AGGG	GGGG	GGGG	GGGG	GGGG	GGGG	GGGG	GGGG	GGGG	AGGG	GGGG	GGGG	GGGG
PotVar0016156	A	G	----	----	----	----	----	----	----	----	----	----	----	----	----	----	----	----	----	----	----	----	----	----	----	----	----	----	----	----	----	----	----	----	----	----	----	----	----	----	----	----	----	----	----	----	----	----	----
PotVar0016172	T	G	TTTG	TTTG	TTTT	TTTT	TTTT	TTGG	TTTT	TTTT	TTTT	TTTG	TTGG	TTTT	TTTT	TTTT	TTTT	TTTG	TTTG	TTGG	TTTT	TTGG	TTTT	TTTT	TTTG	TTTG	TTGG	TTGG	TTTG	----	TTTT	TTTT	TTTT	TTGG	TTTG	TTTG	TTTT	TTTG	TTTT	TTTT	TTTG	TTTT	TTTT	TTTT	TTTT	TTTG	TTGG	TTTT	TTTT
PotVar0016173	T	C	CCCC	CCCC	CCCC	CCCC	CCCC	CCCC	CCCC	CCCC	CCCC	TCCC	TCCC	CCCC	TCCC	CCCC	TCCC	CCCC	CCCC	CCCC	TCCC	CCCC	CCCC	TCCC	TTCC	CCCC	CCCC	CCCC	CCCC	CCCC	CCCC	CCCC	CCCC	CCCC	TTCC	CCCC	CCCC	CCCC	CCCC	CCCC	CCCC	CCCC	TCCC	CCCC	TCCC	CCCC	TCCC	TCCC	TCCC
PotVar0016176	T	C	CCCC	CCCC	TTTC	CCCC	TTCC	TCCC	TCCC	TCCC	TTCC	CCCC	CCCC	TCCC	TCCC	TTCC	CCCC	TCCC	TTCC	CCCC	TCCC	CCCC	TCCC	TTCC	CCCC	TCCC	CCCC	CCCC	CCCC	TCCC	TTTC	TCCC	CCCC	CCCC	CCCC	TTTC	TTCC	CCCC	TTTC	TTCC	TTCC	TCCC	CCCC	TCCC	TTCC	TCCC	CCCC	CCCC	TCCC
PotVar0016177	A	G	AGGG	AGGG	AAAG	AGGG	AAAG	AAAG	AGGG	AAAG	AAGG	AAGG	AAAG	AAGG	AAGG	AAGG	AAGG	AAGG	AAAG	AAGG	AAGG	AAAG	AGGG	----	AAAG	AAGG	AAAG	AAAG	AGGG	AAGG	AAAG	AAGG	GGGG	AAGG	AAAG	AAAA	AAAA	AGGG	AAAG	AAAG	AAAA	AGGG	AGGG	AGGG	AAAG	AAAG	AAAG	AAGG	AAGG
PotVar0016183	T	C	----	----	----	----	----	----	----	----	----	----	----	----	----	----	----	----	----	----	----	----	----	----	----	----	----	----	----	----	----	----	----	----	----	----	----	----	----	----	----	----	----	----	----	----	----	----	----
PotVar0016251	A	G	GGGG	GGGG	GGGG	GGGG	GGGG	GGGG	GGGG	GGGG	GGGG	GGGG	GGGG	AGGG	GGGG	GGGG	GGGG	GGGG	AGGG	GGGG	GGGG	GGGG	GGGG	GGGG	GGGG	GGGG	GGGG	GGGG	GGGG	GGGG	GGGG	GGGG	AAGG	GGGG	GGGG	GGGG	GGGG	AGGG	GGGG	GGGG	GGGG	GGGG	AGGG	GGGG	AGGG	GGGG	GGGG	AGGG	GGGG
PotVar0016254	T	C	TTTT	TTTT	TTTT	TTTT	TTTT	TTTT	TTTT	TTTT	TTTT	TTTT	TTTT	TTTC	TTTT	TTTT	TTTT	TTTT	TTTC	TTTT	TTTT	TTTT	TTTT	TTTT	TTTT	TTTT	TTTT	TTTT	TTTT	TTTT	TTTT	TTTT	TTCC	TTTT	TTTT	TTTT	TTTT	TTTC	TTTT	TTTT	TTTT	TTTT	TTTC	TTTT	TTTC	TTTT	TTTT	TTTC	TTTT
PotVar0016270	A	G	----	----	----	----	----	----	----	----	----	----	----	----	----	----	----	----	----	----	----	----	----	----	----	----	----	----	----	----	----	----	----	----	----	----	----	----	----	----	----	----	----	----	----	----	----	----	----
PotVar0016340	T	G	TTTT	TTTT	TTTT	TTTT	TTTT	TTTT	TTTT	TTTT	TTTT	TTTT	TTTT	TTTT	TTTT	TTTT	TTTG	TTTT	TTTT	TTTT	TTTT	TTTT	TTTT	TTTT	TTTT	TTTT	TTTT	TTTT	TTTT	TTTT	TTTT	TTTT	TTTT	TTTT	TTTT	TTTT	TTTT	TTTT	TTTT	TTTT	TTTT	TTTT	TTTT	TTTT	TTTT	TTTT	TTTT	TTTT	TTTT
PotVar0016341	T	G	GGGG	GGGG	GGGG	GGGG	GGGG	GGGG	GGGG	GGGG	GGGG	GGGG	GGGG	GGGG	GGGG	GGGG	GGGG	GGGG	GGGG	GGGG	GGGG	GGGG	GGGG	GGGG	GGGG	GGGG	GGGG	GGGG	GGGG	----	GGGG	GGGG	GGGG	GGGG	GGGG	GGGG	GGGG	GGGG	GGGG	GGGG	GGGG	GGGG	GGGG	GGGG	GGGG	GGGG	GGGG	GGGG	GGGG
PotVar0016366	T	C	----	----	----	----	----	----	----	----	----	----	----	----	----	----	----	----	----	----	----	----	----	----	----	----	----	----	----	----	----	----	----	----	----	----	----	----	----	----	----	----	----	----	----	----	----	----	----
PotVar0016374	T	C	TTTC	TTTC	TTTC	TTCC	TTCC	TCCC	TTCC	TTCC	TTTC	TTTC	TCCC	TTTC	TTTT	TTTC	TCCC	TCCC	TTTC	CCCC	TTTC	TCCC	TTCC	TTTC	TTCC	TTCC	TCCC	TCCC	TCCC	TCCC	TTTC	TTTC	TTTC	CCCC	TTCC	TTTC	TTTT	TTCC	TTTC	TTTC	TTTC	TTTT	TTCC	TCCC	TTTT	TTCC	TCCC	TTTT	TTTT
PotVar0016379	A	G	----	----	----	----	----	----	----	----	----	----	----	----	----	----	----	----	----	----	----	----	----	----	----	----	----	----	----	----	----	----	----	----	----	----	----	----	----	----	----	----	----	----	----	----	----	----	----
PotVar0016396	A	G	----	----	----	----	----	----	----	----	----	----	----	----	----	----	----	----	----	----	----	----	----	----	----	----	----	----	----	----	----	----	----	----	----	----	----	----	----	----	----	----	----	----	----	----	----	----	----
PotVar0016397	T	C	TTCC	TTTC	TCCC	TTTT	TTCC	TTTC	TTTC	TTTC	TTCC	TTTT	TTTT	TTTC	TTTC	TCCC	TTTT	TTTC	TTCC	TTTT	TTTC	TTTT	TTTC	TTCC	TTTT	TTTC	TTTT	TTTT	TTTT	TTTT	TCCC	TTCC	TTTT	TTTT	TTTT	TCCC	TTCC	TTTT	TCCC	TCCC	TCCC	TTTC	TTTT	TTTC	TTCC	TTTC	TTTT	TTTC	TTCC
PotVar0016403	T	C	TTCC	TCCC	TTTC	CCCC	TTCC	TCCC	TCCC	TCCC	TTCC	CCCC	CCCC	TTCC	TCCC	TTTC	CCCC	TCCC	TTTC	CCCC	TCCC	CCCC	TCCC	----	CCCC	TCCC	CCCC	CCCC	CCCC	CCCC	TTTC	TTCC	TTCC	CCCC	CCCC	TTTC	TTCC	TCCC	TTTC	TTTC	TTTC	TCCC	TCCC	TCCC	TTTC	TCCC	CCCC	TTCC	TTCC
PotVar0016414	T	C	TCCC	TTCC	CCCC	TTCC	CCCC	CCCC	TCCC	CCCC	TCCC	TTTC	TCCC	TCCC	TTCC	CCCC	TCCC	CCCC	CCCC	CCCC	TTCC	TCCC	TCCC	TCCC	TTCC	TCCC	CCCC	CCCC	TCCC	CCCC	CCCC	TCCC	TCCC	CCCC	TTCC	CCCC	CCCC	TCCC	CCCC	CCCC	CCCC	TCCC	TCCC	CCCC	TCCC	CCCC	TCCC	TTCC	TTCC
PotVar0016415	A	C	----	----	----	----	----	----	----	----	----	----	----	----	----	----	----	----	----	----	----	----	----	----	----	----	----	----	----	----	----	----	----	----	----	----	----	----	----	----	----	----	----	----	----	----	----	----	----
PotVar0016416	T	G	GGGG	GGGG	TGGG	TGGG	TGGG	TGGG	TTGG	TGGG	TGGG	GGGG	TGGG	GGGG	GGGG	TGGG	TTGG	TTGG	GGGG	TTGG	TGGG	GGGG	TTGG	GGGG	TGGG	TGGG	TGGG	TGGG	TTGG	----	TGGG	TGGG	TGGG	TTGG	TGGG	GGGG	GGGG	TGGG	TGGG	TGGG	GGGG	GGGG	TTGG	TTTG	GGGG	GGGG	TGGG	GGGG	GGGG
PotVar0016472	A	G	----	----	----	----	----	----	----	----	----	----	----	----	----	----	----	----	----	----	----	----	----	----	----	----	----	----	----	----	----	----	----	----	----	----	----	----	----	----	----	----	----	----	----	----	----	----	----
PotVar0016474	T	C	----	----	----	----	----	----	----	----	----	----	----	----	----	----	----	----	----	----	----	----	----	----	----	----	----	----	----	----	----	----	----	----	----	----	----	----	----	----	----	----	----	----	----	----	----	----	----
[truncated: 19,659 more rows]
[truncated: 43 more columns]
