# Supplementary material for: Genetic loci determining potato starch yield and granule morphology revealed by genome-wide association study (GWAS)
Source: PeerJ journal article supplement (doi:10.7717/peerj.10286), 2020-11-10
Supplement: Supplemental_data_S5.pdf [file Supplemental_data_S5.pdf]

**Expected -Log10(P-Value) vs. -Log10(P-Value)**

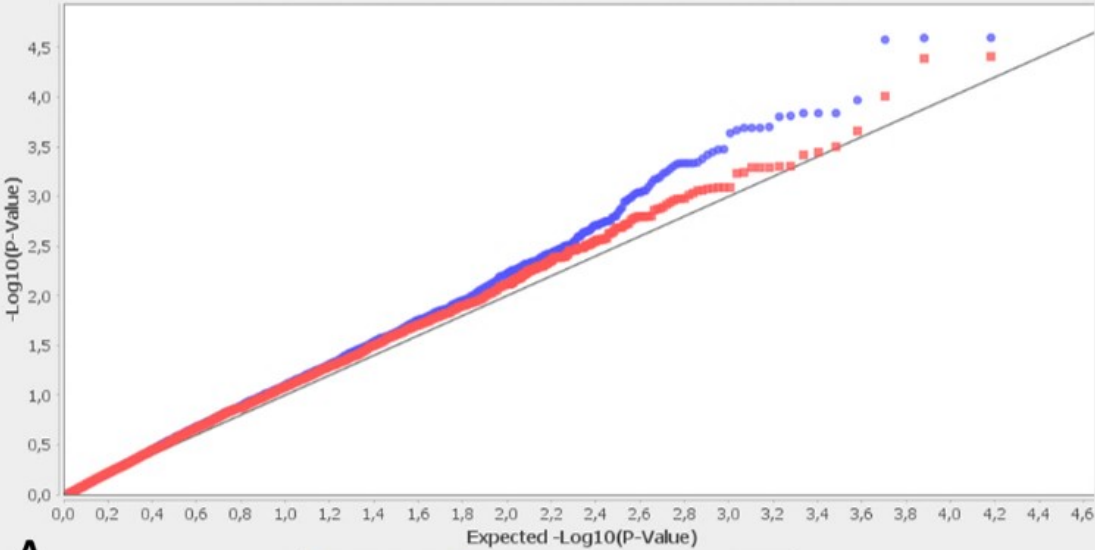

**A**

■ Feret's\_diameter ● Minimal\_Feret's\_diameter — Expected Values

**Expected -Log10(P-Value) vs. -Log10(P-Value)**

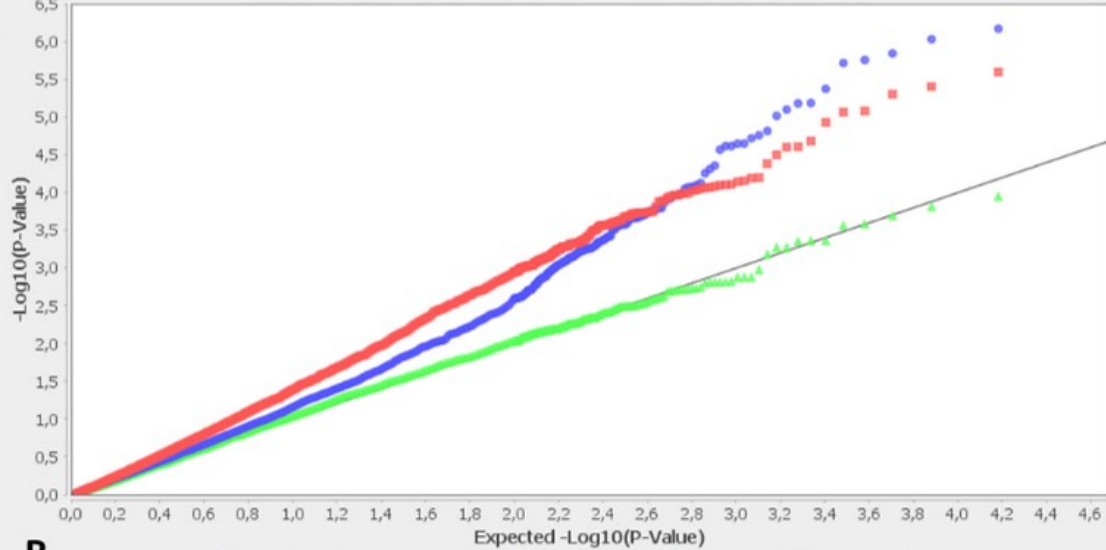

**B**

■ Preparative\_tuber\_starch\_yield,\_% ● Aspect\_Ratio\_(AR) ▲ Circularity — Expected Values

**Expected -Log10(P-Value) vs. -Log10(P-Value)**

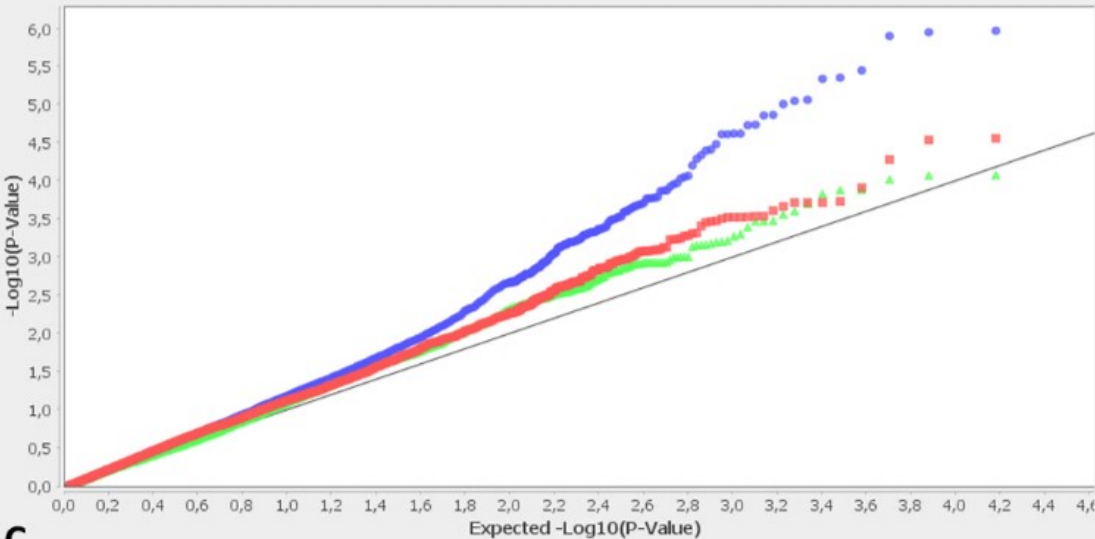

**C**

■ Area\_ ● Roundness ▲ Solidity — Expected Values

**Expected -Log10(P-Value) vs. -Log10(P-Value)**

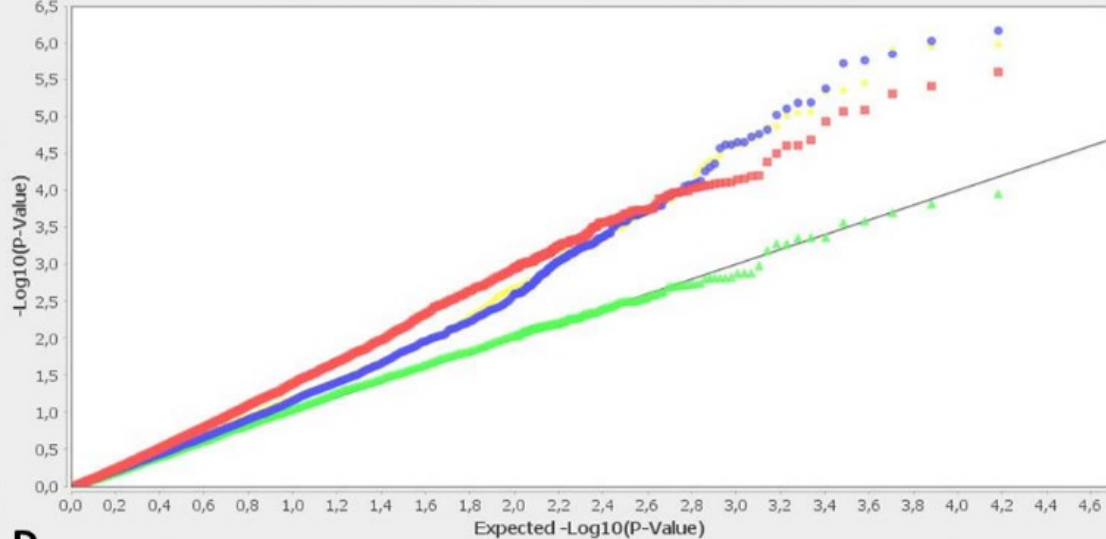

**D**

■ Preparative\_tuber\_starch\_yield,\_% ● Aspect\_Ratio\_(AR) ▲ Circularity ◆ Roundness — Expected Values
