# Supplementary material for: Genetic loci determining potato starch yield and granule morphology revealed by genome-wide association study (GWAS)
Source: PeerJ journal article supplement (doi:10.7717/peerj.10286), 2020-11-10

p-value: 0.022

$2.3 \times 10^{-10}$

$1.8 \times 10^{-62}$

$1.07 \times 10^{-29}$

$1.83 \times 10^{-11}$

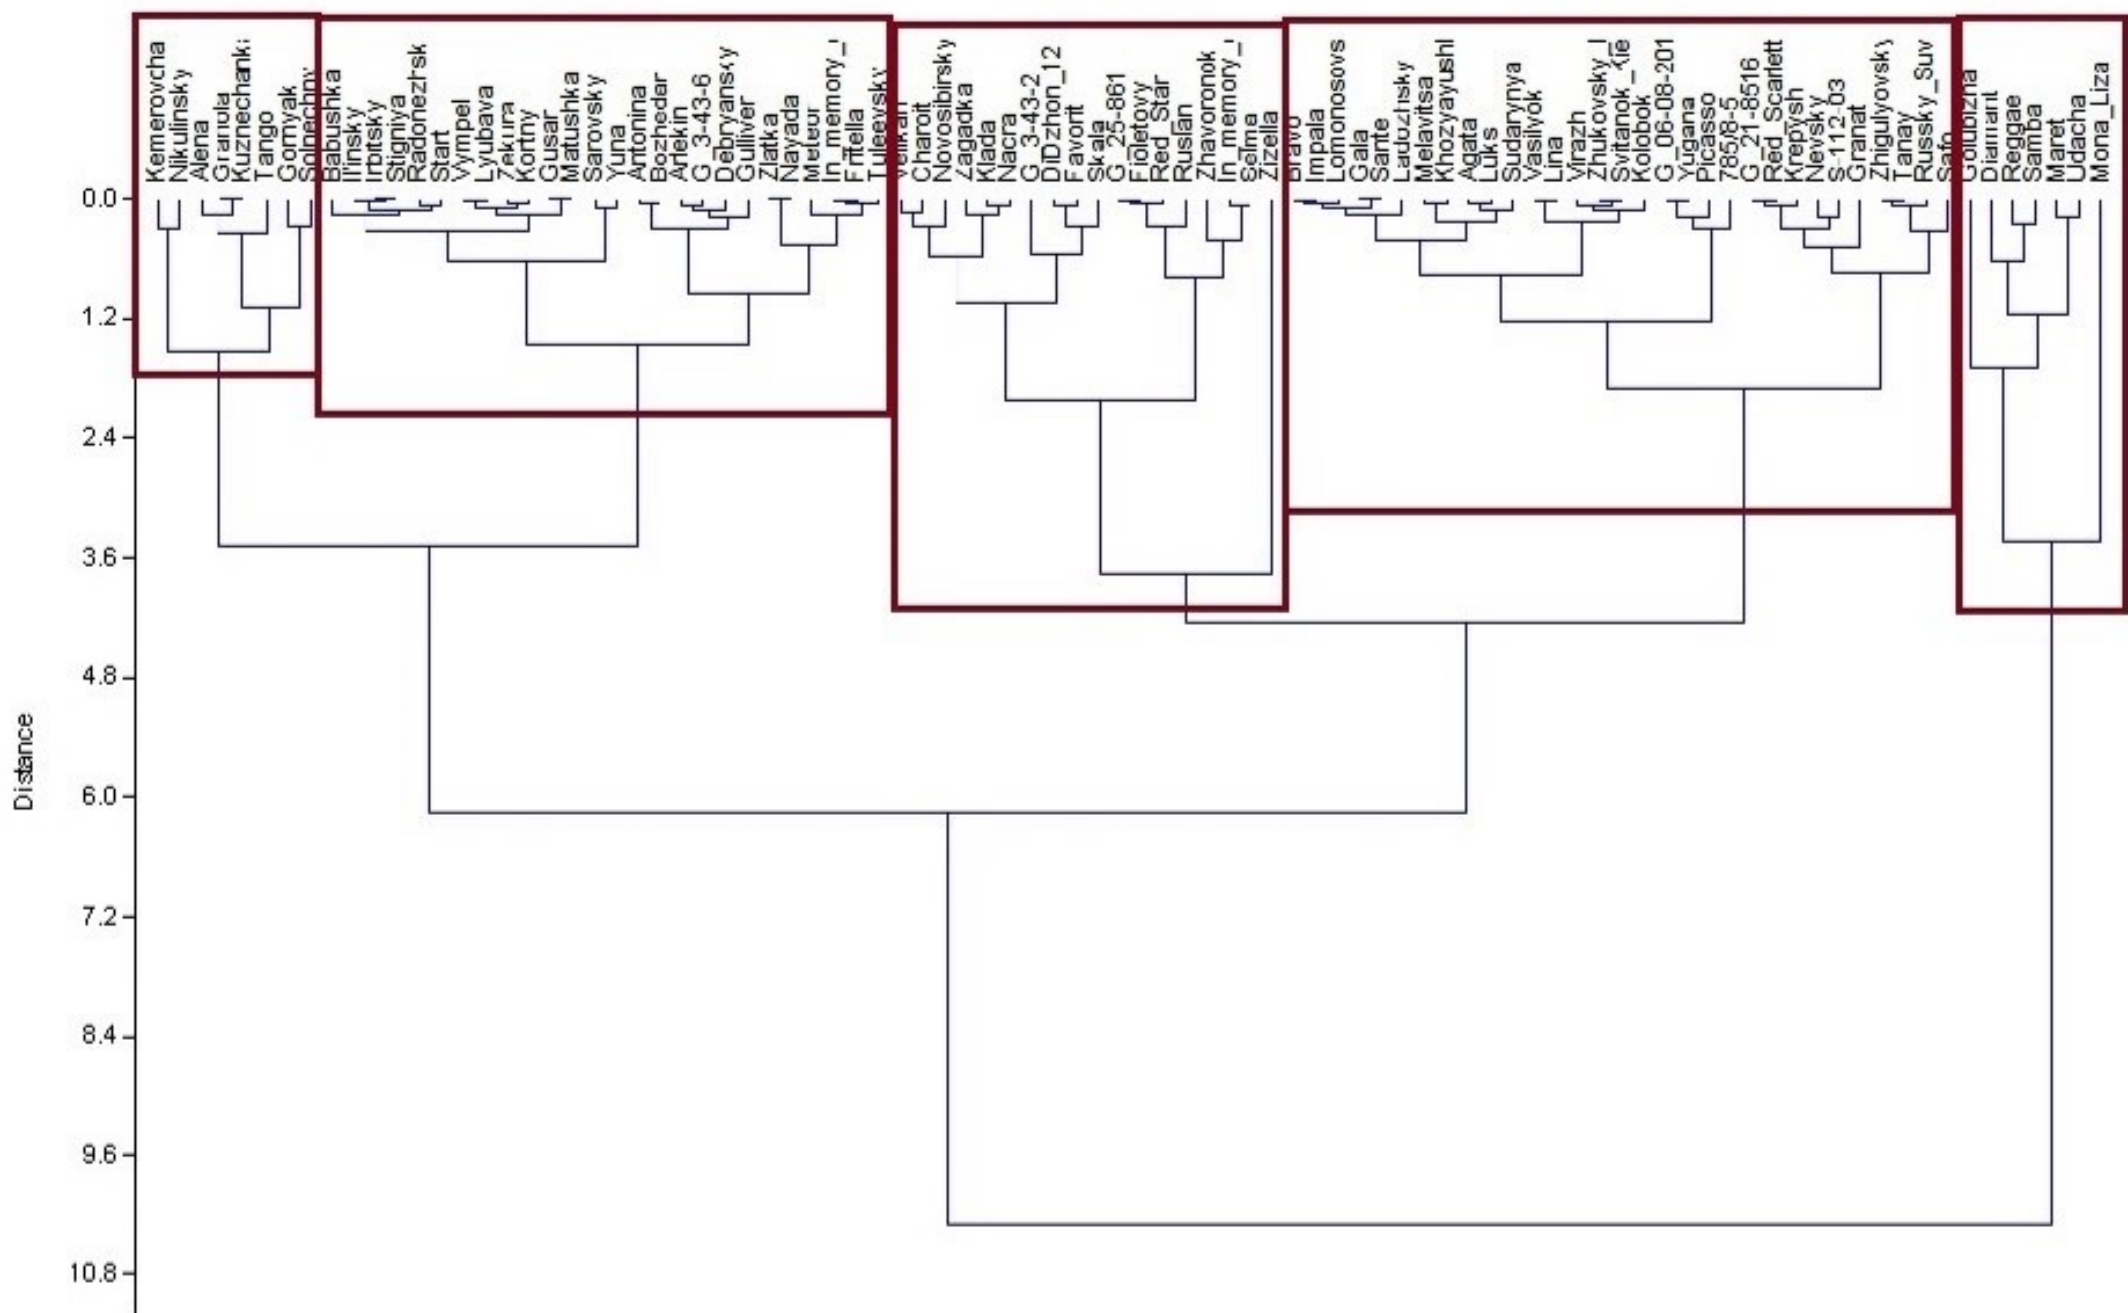

Supplement: Supplemental_data_S8.pdf [file Supplemental_data_S8.pdf]
