# Supplementary material for: Genetic loci determining potato starch yield and granule morphology revealed by genome-wide association study (GWAS)
Source: PeerJ journal article supplement (doi:10.7717/peerj.10286), 2020-11-10

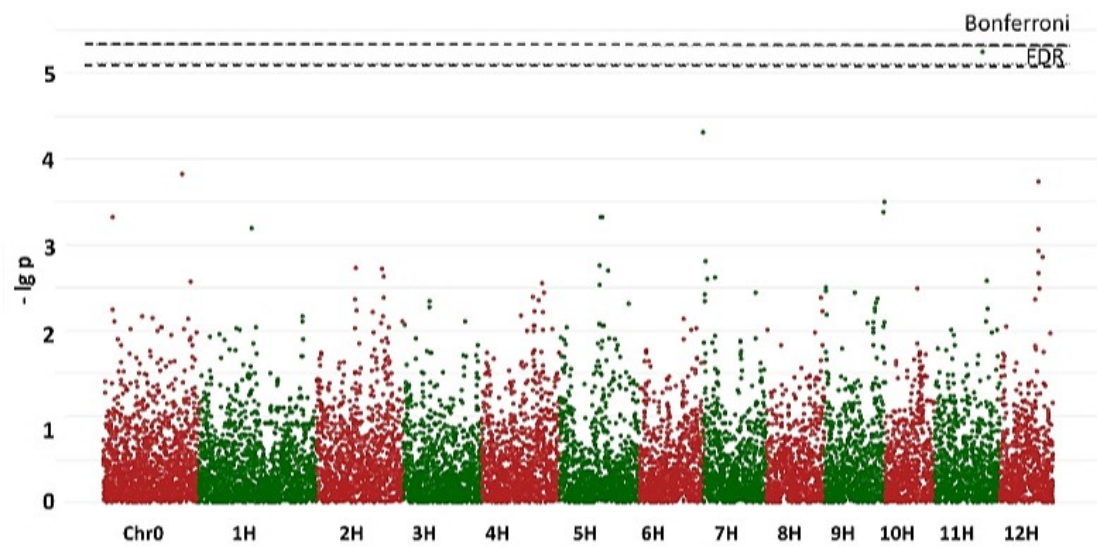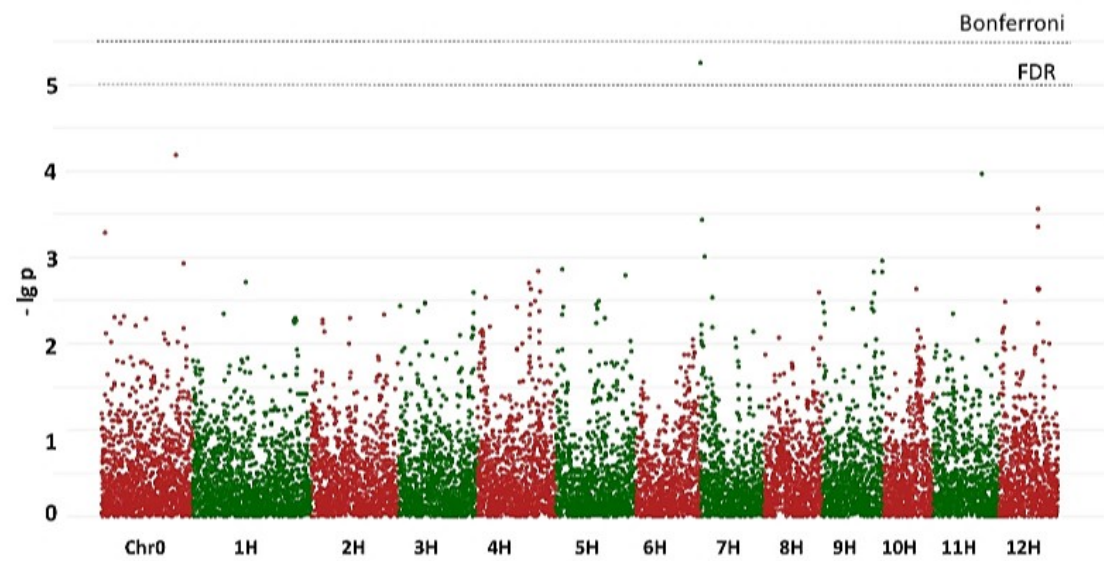

Supplement: Supplemental_data_S9.pdf [file Supplemental_data_S9.pdf]
